# Supplementary material
Source: publisher figshare collection journal article supplement (https://gsajournals.figshare.com/ndownloader/files/30587091)
Supplement: Supplementary file 1 [file 30587091]

## Sheet: Integrated_Function.anno
#GeneID	GO_annotation	KEGG_annotation	KOG_class	KOG_class_annotation	Pfam_annotation	Swissprot_annotation	TrEMBL_annotation	nr_annotation
EVM0006062.1	--	--	--	--	Polyketide cyclase / dehydrase and lipid transport	--	Uncharacterized protein {ECO:0000313|EMBL:EJF57456.1} OS=Dichomitus squalens (strain LYAD-421) PE=4 SV=1	hypothetical protein DICSQDRAFT_69328 [Dichomitus squalens LYAD-421 SS1]
EVM0007641.1	--	--	--	--	--	--	Uncharacterized protein {ECO:0000313|EMBL:EPQ60625.1} OS=Gloeophyllum trabeum (strain ATCC 11539 / FP-39264 / Madison 617) PE=4 SV=1	hypothetical protein DICSQDRAFT_158484 [Dichomitus squalens LYAD-421 SS1]
EVM0006383.1	--	K03360|0|dsq:DICSQDRAFT_58591|RNI-like protein; K03360 F-box and leucine-rich repeat protein GRR1 (A)	[R]	General function prediction only	Leucine Rich repeat	SCF E3 ubiquitin ligase complex F-box protein grrA GN=grrA OS=Emericella nidulans (strain FGSC A4 / ATCC 38163 / CBS 112.46 / NRRL PE=2 SV=1	RNI-like protein {ECO:0000313|EMBL:EJF62300.1} OS=Dichomitus squalens (strain LYAD-421) PE=4 SV=1	RNI-like protein [Dichomitus squalens LYAD-421 SS1]
EVM0007772.1	Molecular Function: metal ion binding (GO:0046872); Molecular Function: iron-sulfur cluster binding (GO:0051536);	--	--	--	Protein of unknown function (DUF455)	--	Uncharacterized protein {ECO:0000313|EMBL:CDO69732.1} OS=Pycnoporus cinnabarinus (Cinnabar-red polypore) PE=4 SV=1	DUF455-domain-containing protein [Trametes versicolor FP-101664 SS1]
EVM0005564.1	--	--	--	--	--	--	Uncharacterized protein {ECO:0000313|EMBL:CDO72287.1} OS=Pycnoporus cinnabarinus (Cinnabar-red polypore) PE=4 SV=1	hypothetical protein TRAVEDRAFT_75338 [Trametes versicolor FP-101664 SS1]
EVM0010595.2	--	--	[R]	General function prediction only	Cyclin	PHO85 cyclin-1 GN=PCL1 OS=Saccharomyces cerevisiae (strain ATCC 204508 / S288c) PE=1 SV=1	Uncharacterized protein {ECO:0000313|EMBL:CDO74176.1} OS=Pycnoporus cinnabarinus (Cinnabar-red polypore) PE=3 SV=1	hypothetical protein DICSQDRAFT_179743 [Dichomitus squalens LYAD-421 SS1]
EVM0000611.1	--	--	--	--	Heparinase II/III-like protein	--	Uncharacterized protein {ECO:0000313|EMBL:CDO72976.1} OS=Pycnoporus cinnabarinus (Cinnabar-red polypore) PE=4 SV=1	hypothetical protein DICSQDRAFT_76035 [Dichomitus squalens LYAD-421 SS1]
EVM0009601.1	--	--	[S]	Function unknown	WD domain, G-beta repeat	Uncharacterized RWD, RING finger and WD repeat-containing protein C11E3.05 GN=SPAC11E3.05 OS=Schizosaccharomyces pombe (strain 972 / ATCC 24843) PE=1 SV=1	Uncharacterized protein {ECO:0000313|EMBL:EJF57000.1} OS=Dichomitus squalens (strain LYAD-421) PE=4 SV=1	hypothetical protein DICSQDRAFT_70401 [Dichomitus squalens LYAD-421 SS1]
EVM0011180.1	--	--	--	--	--	--	Uncharacterized protein {ECO:0000313|EMBL:EJF56661.1} OS=Dichomitus squalens (strain LYAD-421) PE=4 SV=1	hypothetical protein DICSQDRAFT_183704 [Dichomitus squalens LYAD-421 SS1]
EVM0002054.1	--	--	--	--	--	--	Uncharacterized protein {ECO:0000313|EMBL:CDO71232.1} OS=Pycnoporus cinnabarinus (Cinnabar-red polypore) PE=4 SV=1	hypothetical protein DICSQDRAFT_165663 [Dichomitus squalens LYAD-421 SS1]
EVM0010598.1	Biological Process: single-organism metabolic process (GO:0044710);	K00318|0|dsq:DICSQDRAFT_90184|FAD-linked oxidoreductase; K00318 proline dehydrogenase [EC:1.5.-.-] (A)	[E]	Amino acid transport and metabolism	Proline dehydrogenase	Probable proline dehydrogenase, mitochondrial (Precursor) GN=SPCC70.03c OS=Schizosaccharomyces pombe (strain 972 / ATCC 24843) PE=3 SV=1	FAD-linked oxidoreductase {ECO:0000313|EMBL:EJF58822.1} OS=Dichomitus squalens (strain LYAD-421) PE=4 SV=1	FAD-linked oxidoreductase [Dichomitus squalens LYAD-421 SS1]
EVM0009641.1	Molecular Function: hydrolase activity, hydrolyzing O-glycosyl compounds (GO:0004553); Biological Process: carbohydrate metabolic process (GO:0005975);	K05349|0|dsq:DICSQDRAFT_201362|hypothetical protein; K05349 beta-glucosidase [EC:3.2.1.21] (A)	--	--	Glycosyl hydrolase family 3 N terminal domain	Probable beta-glucosidase L (Precursor) GN=bglL OS=Neosartorya fumigata (strain CEA10 / CBS 144.89 / FGSC A1163) PE=3 SV=1	Uncharacterized protein {ECO:0000313|EMBL:EJF60355.1} OS=Dichomitus squalens (strain LYAD-421) PE=4 SV=1	hypothetical protein DICSQDRAFT_201362 [Dichomitus squalens LYAD-421 SS1]
EVM0003097.1	--	--	--	--	Domain of unknown function (DUF4598)	--	Uncharacterized protein {ECO:0000313|EMBL:EJF61588.1} OS=Dichomitus squalens (strain LYAD-421) PE=4 SV=1	hypothetical protein DICSQDRAFT_161484 [Dichomitus squalens LYAD-421 SS1]
EVM0003544.1	Molecular Function: hydrolase activity (GO:0016787);	K01061|0|dsq:DICSQDRAFT_46550|dienelactone hydrolase; K01061 carboxymethylenebutenolidase [EC:3.1.1.45] (A)	--	--	Dienelactone hydrolase family	Putative carboxymethylenebutenolidase GN=YDL086W OS=Saccharomyces cerevisiae (strain ATCC 204508 / S288c) PE=1 SV=1	Dienelactone hydrolase {ECO:0000313|EMBL:EMD41825.1} OS=Ceriporiopsis subvermispora (strain B) PE=4 SV=1	dienelactone hydrolase [Dichomitus squalens LYAD-421 SS1]
EVM0004595.1	--	--	[S]	Function unknown	Protein of unknown function (DUF2838)	Uncharacterized membrane protein C776.05 GN=SPBC776.05 OS=Schizosaccharomyces pombe (strain 972 / ATCC 24843) PE=4 SV=2	Uncharacterized protein {ECO:0000313|EMBL:CDO74556.1} OS=Pycnoporus cinnabarinus (Cinnabar-red polypore) PE=4 SV=1	hypothetical protein DICSQDRAFT_83576 [Dichomitus squalens LYAD-421 SS1]
EVM0012065.1	--	--	[R]	General function prediction only	Reverse transcriptase (RNA-dependent DNA polymerase)	--	Uncharacterized protein {ECO:0000313|EMBL:CDO70490.1} OS=Pycnoporus cinnabarinus (Cinnabar-red polypore) PE=4 SV=1	hypothetical protein BN946_scf184569.g33 [Trametes cinnabarina]
EVM0007481.1	--	--	--	--	--	--	FAD/NAD(P)-binding domain-containing protein {ECO:0000313|EMBL:EJF59786.1} OS=Dichomitus squalens (strain LYAD-421) PE=4 SV=1	FAD/NAD(P)-binding domain-containing protein [Dichomitus squalens LYAD-421 SS1]
EVM0000426.2	--	--	--	--	--	--	Uncharacterized protein {ECO:0000313|EMBL:CDO76824.1} OS=Pycnoporus cinnabarinus (Cinnabar-red polypore) PE=4 SV=1	hypothetical protein DICSQDRAFT_167751 [Dichomitus squalens LYAD-421 SS1]
EVM0008773.1	Molecular Function: threonine-type endopeptidase activity (GO:0004298); Cellular Component: nucleus (GO:0005634); Cellular Component: cytoplasm (GO:0005737); Biological Process: ubiquitin-dependent protein catabolic process (GO:0006511); Cellular Component: proteasome core complex, alpha-subunit complex (GO:0019773);	K02727|1.35462e-169|dsq:DICSQDRAFT_93445|20S proteasome subunit; K02727 20S proteasome subunit alpha 7 [EC:3.4.25.1] (A)	[O]	Posttranslational modification, protein turnover, chaperones	Proteasome subunit	Probable proteasome subunit alpha type-7 GN=O6650 OS=Saccharomyces cerevisiae (strain ATCC 204508 / S288c) PE=1 SV=2	Proteasome subunit alpha type {ECO:0000256|RuleBase:RU000551} OS=Dichomitus squalens (strain LYAD-421) PE=3 SV=1	20S proteasome subunit [Dichomitus squalens LYAD-421 SS1]
EVM0011081.1	Cellular Component: membrane (GO:0016020);	--	[S]	Function unknown	SNARE associated Golgi protein	Golgi apparatus membrane protein TVP38 GN=TVP38 OS=Coprinopsis cinerea (strain Okayama-7 / 130 / ATCC MYA-4618 / FGSC PE=3 SV=1	Golgi apparatus membrane protein TVP38 {ECO:0000313|EMBL:EJF61306.1} OS=Dichomitus squalens (strain LYAD-421) PE=4 SV=1	Golgi apparatus membrane protein TVP38 [Dichomitus squalens LYAD-421 SS1]
EVM0003539.2	Molecular Function: zinc ion binding (GO:0008270); Molecular Function: oxidoreductase activity (GO:0016491); Biological Process: oxidation-reduction process (GO:0055114);	K05351|0|dsq:DICSQDRAFT_86636|xylitol dehydrogenase; K05351 D-xylulose reductase [EC:1.1.1.9] (A)	[Q]	Secondary metabolites biosynthesis, transport and catabolism	Alcohol dehydrogenase GroES-like domain	Probable D-xylulose reductase A GN=xdhA OS=Aspergillus clavatus (strain ATCC 1007 / CBS 513.65 / DSM 816 / NCTC PE=3 SV=2	Xylitol dehydrogenase {ECO:0000313|EMBL:EJF61183.1} OS=Dichomitus squalens (strain LYAD-421) PE=4 SV=1	xylitol dehydrogenase [Dichomitus squalens LYAD-421 SS1]
EVM0007529.1	--	--	--	--	--	--	Uncharacterized protein {ECO:0000313|EMBL:CDO77814.1} OS=Pycnoporus cinnabarinus (Cinnabar-red polypore) PE=4 SV=1	hypothetical protein TRAVEDRAFT_65506 [Trametes versicolor FP-101664 SS1]
EVM0001811.2	--	--	--	--	--	--	Uncharacterized protein {ECO:0000313|EMBL:CDO68834.1} OS=Pycnoporus cinnabarinus (Cinnabar-red polypore) PE=4 SV=1	hypothetical protein TRAVEDRAFT_37052 [Trametes versicolor FP-101664 SS1]
EVM0010496.1	--	--	--	--	C2H2-type zinc finger	--	Uncharacterized protein {ECO:0000313|EMBL:EJF59734.1} OS=Dichomitus squalens (strain LYAD-421) PE=4 SV=1	hypothetical protein DICSQDRAFT_156086 [Dichomitus squalens LYAD-421 SS1]
EVM0011173.1	--	--	--	--	--	--	Uncharacterized protein {ECO:0000313|EMBL:EIW51828.1} OS=Trametes versicolor (strain FP-101664) PE=4 SV=1	hypothetical protein TRAVEDRAFT_49590 [Trametes versicolor FP-101664 SS1]
EVM0012170.1	Molecular Function: transferase activity (GO:0016740);	K10967|0|dsq:DICSQDRAFT_105020|glycosyltransferase family 15 protein; K10967 alpha 1,2-mannosyltransferase [EC:2.4.1.-] (A)	[G]	Carbohydrate transport and metabolism	Glycolipid 2-alpha-mannosyltransferase	Glycolipid 2-alpha-mannosyltransferase GN=D8035.26 OS=Saccharomyces cerevisiae (strain ATCC 204508 / S288c) PE=1 SV=1	Glycosyltransferase family 15 protein {ECO:0000313|EMBL:EJF61914.1} OS=Dichomitus squalens (strain LYAD-421) PE=4 SV=1	glycosyltransferase family 15 protein [Dichomitus squalens LYAD-421 SS1]
EVM0008011.2	--	--	[R]	General function prediction only	Major Facilitator Superfamily	MFS antiporter QDR3 {ECO:0000305} OS=Candida albicans (strain SC5314 / ATCC MYA-2876) PE=2 SV=1	MFS general substrate transporter {ECO:0000313|EMBL:EJF56307.1} OS=Dichomitus squalens (strain LYAD-421) PE=4 SV=1	MFS general substrate transporter [Dichomitus squalens LYAD-421 SS1]
EVM0005209.1	--	--	--	--	--	--	Uncharacterized protein {ECO:0000313|EMBL:EJF56336.1} OS=Dichomitus squalens (strain LYAD-421) PE=4 SV=1	hypothetical protein DICSQDRAFT_141312 [Dichomitus squalens LYAD-421 SS1]
EVM0008791.1	--	--	--	--	Glycosyl Hydrolase Family 88	--	Uncharacterized protein {ECO:0000313|EMBL:EJF61292.1} OS=Dichomitus squalens (strain LYAD-421) PE=4 SV=1	hypothetical protein DICSQDRAFT_127282 [Dichomitus squalens LYAD-421 SS1]
EVM0004189.1	--	--	--	--	Transposase family tnp2	--	Uncharacterized protein {ECO:0000313|EMBL:EJF57317.1} (Fragment) OS=Dichomitus squalens (strain LYAD-421) PE=4 SV=1	hypothetical protein DICSQDRAFT_35914, partial [Dichomitus squalens LYAD-421 SS1]
EVM0001942.1	Cellular Component: membrane (GO:0016020);	--	[PQ]	--	Ferric reductase like transmembrane component	Ferric reductase transmembrane component 3 (Precursor) GN=FRE3 OS=Saccharomyces cerevisiae (strain ATCC 204508 / S288c) PE=1 SV=1	Iron reductase {ECO:0000313|EMBL:EJF58895.1} OS=Dichomitus squalens (strain LYAD-421) PE=4 SV=1	iron reductase [Dichomitus squalens LYAD-421 SS1]
EVM0010356.1	--	K15193|0|dsq:DICSQDRAFT_133358|hypothetical protein; K15193 protein SPT2 (A)	--	--	SPT2 chromatin protein	Protein spt2 GN=spt2 OS=Schizosaccharomyces pombe (strain 972 / ATCC 24843) PE=3 SV=1	Uncharacterized protein {ECO:0000313|EMBL:EMD34105.1} OS=Ceriporiopsis subvermispora (strain B) PE=4 SV=1	hypothetical protein DICSQDRAFT_133358 [Dichomitus squalens LYAD-421 SS1]
EVM0002287.2	--	--	--	--	--	--	Uncharacterized protein {ECO:0000313|EMBL:CDO72914.1} OS=Pycnoporus cinnabarinus (Cinnabar-red polypore) PE=4 SV=1	hypothetical protein DICSQDRAFT_159109 [Dichomitus squalens LYAD-421 SS1]
EVM0002149.1	--	--	--	--	--	--	Uncharacterized protein {ECO:0000313|EMBL:EJF57581.1} OS=Dichomitus squalens (strain LYAD-421) PE=4 SV=1	hypothetical protein DICSQDRAFT_183109 [Dichomitus squalens LYAD-421 SS1]
EVM0001258.1	--	--	--	--	--	--	Uncharacterized protein {ECO:0000313|EMBL:EJF58859.1} OS=Dichomitus squalens (strain LYAD-421) PE=4 SV=1	hypothetical protein DICSQDRAFT_172518 [Dichomitus squalens LYAD-421 SS1]
EVM0009175.1	--	K00974|0|dsq:DICSQDRAFT_139389|hypothetical protein; K00974 tRNA nucleotidyltransferase (CCA-adding enzyme) [EC:2.7.7.72 3.1.3.- 3.1.4.-] (A)	[J]	Translation, ribosomal structure and biogenesis	Poly A polymerase head domain	CCA tRNA nucleotidyltransferase, mitochondrial (Precursor) GN=CCA1 OS=Saccharomyces cerevisiae (strain ATCC 204508 / S288c) PE=1 SV=1	Uncharacterized protein {ECO:0000313|EMBL:EJF58457.1} OS=Dichomitus squalens (strain LYAD-421) PE=3 SV=1	hypothetical protein DICSQDRAFT_139389 [Dichomitus squalens LYAD-421 SS1]
EVM0000002.1	Biological Process: RNA splicing (GO:0008380); Cellular Component: small nuclear ribonucleoprotein complex (GO:0030532);	K11096|3.92994e-75|dsq:DICSQDRAFT_142202|Sm-like ribonucleo protein; K11096 small nuclear ribonucleoprotein D2 (A)	[A]	RNA processing and modification	LSM domain	Small nuclear ribonucleoprotein Sm D2 GN=smd2 OS=Schizosaccharomyces pombe (strain 972 / ATCC 24843) PE=1 SV=1	Uncharacterized protein {ECO:0000313|EMBL:EPT04241.1} OS=Fomitopsis pinicola (strain FP-58527) PE=4 SV=1	Sm-like ribonucleo protein [Dichomitus squalens LYAD-421 SS1]
EVM0011429.1	--	K08773|0|dsq:DICSQDRAFT_178675|hypothetical protein; K08773 RalA-binding protein 1 (A)	[T]	Signal transduction mechanisms	RhoGAP domain	Probable Rho-type GTPase-activating protein 2 GN=rga2 OS=Schizosaccharomyces pombe (strain 972 / ATCC 24843) PE=1 SV=1	Uncharacterized protein {ECO:0000313|EMBL:CDO74684.1} OS=Pycnoporus cinnabarinus (Cinnabar-red polypore) PE=4 SV=1	hypothetical protein DICSQDRAFT_178675 [Dichomitus squalens LYAD-421 SS1]
EVM0013230.1	Molecular Function: organic cyclic compound binding (GO:0097159); Molecular Function: heterocyclic compound binding (GO:1901363);	K07050|0|dsq:DICSQDRAFT_103029|hypothetical protein; K07050 misacylated tRNA(Ala) deacylase [EC:3.1.1.-] (A)	[R]	General function prediction only	--	Putative alanyl-tRNA editing protein alaX GN=YNL040W OS=Saccharomyces cerevisiae (strain ATCC 204508 / S288c) PE=1 SV=1	Uncharacterized protein {ECO:0000313|EMBL:CDO71386.1} OS=Pycnoporus cinnabarinus (Cinnabar-red polypore) PE=4 SV=1	hypothetical protein DICSQDRAFT_103029 [Dichomitus squalens LYAD-421 SS1]
EVM0001958.1	Molecular Function: catalytic activity (GO:0003824);	--	--	--	Cyclic phosphodiesterase-like protein	--	Uncharacterized protein {ECO:0000313|EMBL:EIW51764.1} (Fragment) OS=Trametes versicolor (strain FP-101664) PE=4 SV=1	hypothetical protein DICSQDRAFT_98312 [Dichomitus squalens LYAD-421 SS1]
EVM0003726.1	--	--	[R]	General function prediction only	Sugar (and other) transporter	Lactose permease GN=LAC12 OS=Kluyveromyces lactis (strain ATCC 8585 / CBS 2359 / DSM 70799 / NBRC PE=3 SV=1	Uncharacterized protein {ECO:0000313|EMBL:EMD33795.1} OS=Ceriporiopsis subvermispora (strain B) PE=3 SV=1	general substrate transporter [Dichomitus squalens LYAD-421 SS1]
EVM0003512.2	--	--	[R]	General function prediction only	Major Facilitator Superfamily	Uncharacterized MFS-type transporter C1271.10c GN=SPBC1271.10c OS=Schizosaccharomyces pombe (strain 972 / ATCC 24843) PE=1 SV=1	Uncharacterized protein {ECO:0000313|EMBL:KDR85575.1} OS=Galerina marginata CBS 339.88 PE=4 SV=1	MFS general substrate transporter [Trametes versicolor FP-101664 SS1]
EVM0008364.1	--	--	[U]	Intracellular trafficking, secretion, and vesicular transport	Endoplasmic reticulum vesicle transporter	ER-derived vesicles protein ERV41 GN=ERV41 OS=Saccharomyces cerevisiae (strain ATCC 204508 / S288c) PE=1 SV=1	Uncharacterized protein {ECO:0000313|EMBL:EJF59129.1} OS=Dichomitus squalens (strain LYAD-421) PE=4 SV=1	hypothetical protein DICSQDRAFT_156384 [Dichomitus squalens LYAD-421 SS1]
EVM0009047.1	--	--	[OR]	--	Serine carboxypeptidase S28	--	Uncharacterized protein {ECO:0000313|EMBL:EJF57333.1} OS=Dichomitus squalens (strain LYAD-421) PE=4 SV=1	hypothetical protein DICSQDRAFT_69770 [Dichomitus squalens LYAD-421 SS1]
EVM0000942.1	--	K11236|3.86521e-87|dsq:DICSQDRAFT_177799|hypothetical protein; K11236 cell division control protein 24 (A)	--	--	--	--	Uncharacterized protein {ECO:0000313|EMBL:CDO78162.1} OS=Pycnoporus cinnabarinus (Cinnabar-red polypore) PE=4 SV=1	hypothetical protein DICSQDRAFT_177799 [Dichomitus squalens LYAD-421 SS1]
EVM0002112.1	--	--	--	--	--	--	Predicted protein {ECO:0000313|EMBL:EED85481.1} (Fragment) OS=Postia placenta (strain ATCC 44394 / Madison 698-R) PE=4 SV=1	hypothetical protein TRAVEDRAFT_130524 [Trametes versicolor FP-101664 SS1]
EVM0004839.1	--	--	--	--	--	--	Uncharacterized protein {ECO:0000313|EMBL:CCM06805.1} OS=Fibroporia radiculosa (strain TFFH 294) PE=4 SV=1	hypothetical protein TRAVEDRAFT_65494 [Trametes versicolor FP-101664 SS1]
EVM0003578.1	--	--	--	--	--	--	Uncharacterized protein {ECO:0000313|EMBL:EJF60023.1} (Fragment) OS=Dichomitus squalens (strain LYAD-421) PE=4 SV=1	hypothetical protein DICSQDRAFT_88487, partial [Dichomitus squalens LYAD-421 SS1]
EVM0000944.1	--	--	--	--	--	--	Uncharacterized protein {ECO:0000313|EMBL:EJF61007.1} OS=Dichomitus squalens (strain LYAD-421) PE=4 SV=1	hypothetical protein DICSQDRAFT_180986 [Dichomitus squalens LYAD-421 SS1]
EVM0009910.1	--	--	[T]	Signal transduction mechanisms	Carboxylesterase family	Lipase 4 (Precursor) GN=LIP4 OS=Candida rugosa (Yeast) PE=3 SV=1	Carotenoid ester lipase {ECO:0000313|EMBL:EJF57054.1} OS=Dichomitus squalens (strain LYAD-421) PE=3 SV=1	carotenoid ester lipase [Dichomitus squalens LYAD-421 SS1]
EVM0000878.1	--	K01102|0|dsq:DICSQDRAFT_99771|protein serine/threonine phosphatase 2C; K01102 pyruvate dehydrogenase phosphatase [EC:3.1.3.43] (A)	[T]	Signal transduction mechanisms	Protein phosphatase 2C	[Pyruvate dehydrogenase [acetyl-transferring]]-phosphatase 1, mitochondrial (Precursor) GN=YOR3157C OS=Saccharomyces cerevisiae (strain ATCC 204508 / S288c) PE=1 SV=1	Uncharacterized protein {ECO:0000313|EMBL:ETW76513.1} OS=Heterobasidion irregulare TC 32-1 PE=4 SV=1	protein serine/threonine phosphatase 2C [Dichomitus squalens LYAD-421 SS1]
EVM0003338.1	--	--	--	--	--	--	Uncharacterized protein {ECO:0000313|EMBL:EJF55692.1} OS=Dichomitus squalens (strain LYAD-421) PE=4 SV=1	hypothetical protein TRAVEDRAFT_51609 [Trametes versicolor FP-101664 SS1]
EVM0005010.1	Biological Process: transport (GO:0006810);	--	[U]	Intracellular trafficking, secretion, and vesicular transport	Clathrin adaptor complex small chain	Probable coatomer subunit zeta GN=ret3 OS=Schizosaccharomyces pombe (strain 972 / ATCC 24843) PE=3 SV=1	Uncharacterized protein {ECO:0000313|EMBL:CDO74702.1} OS=Pycnoporus cinnabarinus (Cinnabar-red polypore) PE=4 SV=1	hypothetical protein BN946_scf184847.g10 [Trametes cinnabarina]
EVM0004734.1	--	--	--	--	--	--	Uncharacterized protein {ECO:0000313|EMBL:KDR64866.1} OS=Galerina marginata CBS 339.88 PE=4 SV=1	hypothetical protein CY34DRAFT_18499 [Suillus luteus UH-Slu-Lm8-n1]
EVM0008445.2	--	--	--	--	Thaumatin family	--	Osmotin, thaumatin-like protein {ECO:0000313|EMBL:EPQ60063.1} OS=Gloeophyllum trabeum (strain ATCC 11539 / FP-39264 / Madison 617) PE=4 SV=1	Osmotin thaumatin-like protein [Dichomitus squalens LYAD-421 SS1]
EVM0001515.1	--	K15267|0|dsq:DICSQDRAFT_166202|S-adenosyl-L-methionine-dependent methyltransferase; K15267 mitochondrial transcription factor 1 (A)	--	--	Ribosomal RNA adenine dimethylase	Mitochondrial transcription factor 1 GN=MTF1 OS=Saccharomyces cerevisiae (strain ATCC 204508 / S288c) PE=1 SV=4	Uncharacterized protein {ECO:0000313|EMBL:CCM06868.1} OS=Fibroporia radiculosa (strain TFFH 294) PE=4 SV=1	S-adenosyl-L-methionine-dependent methyltransferase [Dichomitus squalens LYAD-421 SS1]
EVM0002950.3	--	--	--	--	--	--	Predicted protein {ECO:0000313|EMBL:EED85005.1} OS=Postia placenta (strain ATCC 44394 / Madison 698-R) PE=4 SV=1	hypothetical protein TRAVEDRAFT_74413 [Trametes versicolor FP-101664 SS1]
EVM0004935.1	--	--	--	--	--	--	Uncharacterized protein {ECO:0000313|EMBL:EJF58330.1} OS=Dichomitus squalens (strain LYAD-421) PE=4 SV=1	hypothetical protein DICSQDRAFT_139421 [Dichomitus squalens LYAD-421 SS1]
EVM0006049.1	Molecular Function: metalloendopeptidase activity (GO:0004222); Biological Process: proteolysis (GO:0006508); Molecular Function: metal ion binding (GO:0046872);	K17732|0|dsq:DICSQDRAFT_106645|mitochondrial processing peptidase beta subunit; K17732 mitochondrial-processing peptidase subunit beta [EC:3.4.24.64] (A)	[O]	Posttranslational modification, protein turnover, chaperones	Insulinase (Peptidase family M16)	Mitochondrial-processing peptidase subunit beta (Precursor) GN=mppB OS=Lentinula edodes (Shiitake mushroom) PE=3 SV=1	Mitochondrial processing peptidase beta subunit {ECO:0000313|EMBL:EJF61001.1} OS=Dichomitus squalens (strain LYAD-421) PE=3 SV=1	mitochondrial processing peptidase beta subunit [Dichomitus squalens LYAD-421 SS1]
EVM0009337.1	--	--	--	--	GRF zinc finger	--	Uncharacterized protein {ECO:0000313|EMBL:CDO75350.1} OS=Pycnoporus cinnabarinus (Cinnabar-red polypore) PE=4 SV=1	hypothetical protein DICSQDRAFT_159493 [Dichomitus squalens LYAD-421 SS1]
EVM0007730.1	--	--	--	--	--	--	Uncharacterized protein {ECO:0000313|EMBL:EPQ58224.1} OS=Gloeophyllum trabeum (strain ATCC 11539 / FP-39264 / Madison 617) PE=4 SV=1	hypothetical protein DICSQDRAFT_132150 [Dichomitus squalens LYAD-421 SS1]
EVM0005390.1	--	--	--	--	--	--	Uncharacterized protein {ECO:0000313|EMBL:EPT01014.1} OS=Fomitopsis pinicola (strain FP-58527) PE=4 SV=1	hypothetical protein TRAVEDRAFT_28986 [Trametes versicolor FP-101664 SS1]
EVM0001676.1	--	--	--	--	--	--	Response regulator receiver {ECO:0000313|EMBL:EMD37750.1} OS=Ceriporiopsis subvermispora (strain B) PE=4 SV=1	hypothetical protein DICSQDRAFT_19546, partial [Dichomitus squalens LYAD-421 SS1]
EVM0008814.1	--	--	[Q]	Secondary metabolites biosynthesis, transport and catabolism	Cytochrome P450	O-methylsterigmatocystin oxidoreductase GN=ordA OS=Aspergillus parasiticus PE=1 SV=1	Cytochrome P450 {ECO:0000313|EMBL:EJF56877.1} OS=Dichomitus squalens (strain LYAD-421) PE=4 SV=1	cytochrome P450 [Dichomitus squalens LYAD-421 SS1]
EVM0004345.1	--	--	--	--	--	--	Uncharacterized protein {ECO:0000313|EMBL:EJF56434.1} OS=Dichomitus squalens (strain LYAD-421) PE=4 SV=1	hypothetical protein DICSQDRAFT_174885 [Dichomitus squalens LYAD-421 SS1]
EVM0010023.1	--	--	--	--	--	--	Uncharacterized protein {ECO:0000313|EMBL:EJF58601.1} OS=Dichomitus squalens (strain LYAD-421) PE=4 SV=1	hypothetical protein DICSQDRAFT_182430 [Dichomitus squalens LYAD-421 SS1]
EVM0000577.1	Molecular Function: acid-amino acid ligase activity (GO:0016881);	K10575|1.38213e-110|dsq:DICSQDRAFT_155896|ubiquitin-conjugating enzyme; K10575 ubiquitin-conjugating enzyme E2 G1 [EC:6.3.2.19] (A)	[O]	Posttranslational modification, protein turnover, chaperones	Ubiquitin-conjugating enzyme	Ubiquitin-conjugating enzyme E2 15 GN=ubc15 OS=Schizosaccharomyces pombe (strain 972 / ATCC 24843) PE=3 SV=1	Ubiquitin conjugating enzyme {ECO:0000313|EMBL:AHC00618.1} OS=Ganoderma lucidum (Ling zhi medicinal fungus) PE=2 SV=1	ubiquitin conjugating enzyme [Ganoderma lucidum]
EVM0008833.1	Cellular Component: mitochondrial inner membrane (GO:0005743); Biological Process: mitochondrial pyruvate transport (GO:0006850);	--	[S]	Function unknown	Uncharacterised protein family (UPF0041)	Probable mitochondrial pyruvate carrier 1 {ECO:0000250|UniProtKB:P53157} OS=Schizosaccharomyces pombe (strain 972 / ATCC 24843) PE=3 SV=3	UPF0041-domain-containing protein {ECO:0000313|EMBL:EPQ60651.1} OS=Gloeophyllum trabeum (strain ATCC 11539 / FP-39264 / Madison 617) PE=4 SV=1	hypothetical protein DICSQDRAFT_164572 [Dichomitus squalens LYAD-421 SS1]
EVM0011427.1	--	--	--	--	Protein of unknown function (DUF2413)	Maintenance of telomere capping protein 1 GN=SPCC1322.09 OS=Schizosaccharomyces pombe (strain 972 / ATCC 24843) PE=3 SV=1	Uncharacterized protein {ECO:0000313|EMBL:CDO70282.1} OS=Pycnoporus cinnabarinus (Cinnabar-red polypore) PE=4 SV=1	hypothetical protein DICSQDRAFT_123147 [Dichomitus squalens LYAD-421 SS1]
EVM0012197.1	--	--	[S]	Function unknown	Leucine Rich repeats (2 copies)	Adenylate cyclase GN=cyr1 OS=Schizosaccharomyces pombe (strain 972 / ATCC 24843) PE=1 SV=1	Uncharacterized protein {ECO:0000313|EMBL:EJF58587.1} OS=Dichomitus squalens (strain LYAD-421) PE=4 SV=1	hypothetical protein DICSQDRAFT_109895 [Dichomitus squalens LYAD-421 SS1]
EVM0007350.1	--	--	--	--	--	--	Uncharacterized protein {ECO:0000313|EMBL:EJF60457.1} OS=Dichomitus squalens (strain LYAD-421) PE=4 SV=1	hypothetical protein DICSQDRAFT_137539 [Dichomitus squalens LYAD-421 SS1]
EVM0003068.1	Molecular Function: catalytic activity (GO:0003824); Biological Process: cellular metabolic process (GO:0044237); Molecular Function: coenzyme binding (GO:0050662);	K02377|0|dsq:DICSQDRAFT_105592|epimerase-domain-containing protein; K02377 GDP-L-fucose synthase [EC:1.1.1.271] (A)	[GO]	--	NAD dependent epimerase/dehydratase family	Aldose 1-epimerase GN=gal10 OS=Schizosaccharomyces pombe (strain 972 / ATCC 24843) PE=3 SV=1	Epimerase-domain-containing protein {ECO:0000313|EMBL:EJF61864.1} OS=Dichomitus squalens (strain LYAD-421) PE=3 SV=1	epimerase-domain-containing protein [Dichomitus squalens LYAD-421 SS1]
EVM0000559.1	--	--	[U]	Intracellular trafficking, secretion, and vesicular transport	Transport protein particle (TRAPP) component	Uncharacterized protein C13G6.05c GN=SPAC13G6.05c OS=Schizosaccharomyces pombe (strain 972 / ATCC 24843) PE=1 SV=3	Transport protein particle component {ECO:0000313|EMBL:EJF55933.1} OS=Dichomitus squalens (strain LYAD-421) PE=4 SV=1	transport protein particle component [Dichomitus squalens LYAD-421 SS1]
EVM0000078.1	--	--	--	--	--	--	Uncharacterized protein {ECO:0000313|EMBL:EJF60902.1} OS=Dichomitus squalens (strain LYAD-421) PE=4 SV=1	hypothetical protein DICSQDRAFT_181129 [Dichomitus squalens LYAD-421 SS1]
EVM0007908.1	Molecular Function: structural constituent of ribosome (GO:0003735); Cellular Component: ribosome (GO:0005840); Biological Process: translation (GO:0006412); Molecular Function: rRNA binding (GO:0019843); Molecular Function: metal ion binding (GO:0046872);	K02922|1.48403e-59|dsq:DICSQDRAFT_178778|hypothetical protein; K02922 large subunit ribosomal protein L37e (A)	[J]	Translation, ribosomal structure and biogenesis	Ribosomal protein L37e	60S ribosomal protein L37-A GN=L9470.6 OS=Saccharomyces cerevisiae (strain ATCC 204508 / S288c) PE=1 SV=2	Ribosomal protein L37 {ECO:0000256|RuleBase:RU000576} OS=Postia placenta (strain ATCC 44394 / Madison 698-R) PE=3 SV=1	hypothetical protein DICSQDRAFT_178778 [Dichomitus squalens LYAD-421 SS1]
EVM0002488.2	--	--	--	--	Voltage-dependent anion channel	Sulfite efflux pump SSU1 GN=SSU1 OS=Arthroderma benhamiae (Trichophyton mentagrophytes) PE=2 SV=1	Uncharacterized protein {ECO:0000313|EMBL:EJF58632.1} OS=Dichomitus squalens (strain LYAD-421) PE=4 SV=1	hypothetical protein DICSQDRAFT_172828 [Dichomitus squalens LYAD-421 SS1]
EVM0004357.1	--	K18932|4.46591e-139|gtr:GLOTRDRAFT_121300|zf-DHHC-domain-containing protein; K18932 palmitoyltransferase [EC:2.3.1.225] (A)	[R]	General function prediction only	DHHC palmitoyltransferase	Palmitoyltransferase pfa3 GN=ptr-3 OS=Neurospora crassa (strain ATCC 24698 / 74-OR23-1A / CBS 708.71 / DSM PE=3 SV=3	Palmitoyltransferase {ECO:0000256|RuleBase:RU079119} OS=Ceriporiopsis subvermispora (strain B) PE=3 SV=1	zf-DHHC-domain-containing protein [Trametes versicolor FP-101664 SS1]
EVM0006281.1	Molecular Function: triose-phosphate isomerase activity (GO:0004807); Biological Process: gluconeogenesis (GO:0006094); Biological Process: glycolytic process (GO:0006096);	K01803|1.07419e-151|dsq:DICSQDRAFT_81871|triose phosphate isomerase; K01803 triosephosphate isomerase (TIM) [EC:5.3.1.1] (A)	[G]	Carbohydrate transport and metabolism	Triosephosphate isomerase	Triosephosphate isomerase GN=TPI OS=Coprinopsis cinerea (strain Okayama-7 / 130 / ATCC MYA-4618 / FGSC PE=3 SV=2	Triosephosphate isomerase {ECO:0000256|RuleBase:RU000517} OS=Fibroporia radiculosa (strain TFFH 294) PE=3 SV=1	triose phosphate isomerase [Dichomitus squalens LYAD-421 SS1]
EVM0002496.1	--	--	--	--	Galactose oxidase, central domain	--	Uncharacterized protein {ECO:0000313|EMBL:CDO71013.1} OS=Pycnoporus cinnabarinus (Cinnabar-red polypore) PE=4 SV=1	hypothetical protein BN946_scf184844.g17 [Trametes cinnabarina]
EVM0010745.1	Molecular Function: structural constituent of ribosome (GO:0003735); Cellular Component: ribosome (GO:0005840); Biological Process: translation (GO:0006412);	K02953|3.82211e-105|dsq:DICSQDRAFT_156835|hypothetical protein; K02953 small subunit ribosomal protein S13e (A)	[J]	Translation, ribosomal structure and biogenesis	Ribosomal S13/S15 N-terminal domain	40S ribosomal protein S13 GN=RPS13 OS=Agaricus bisporus (White button mushroom) PE=2 SV=1	Uncharacterized protein {ECO:0000313|EMBL:CDO71010.1} OS=Pycnoporus cinnabarinus (Cinnabar-red polypore) PE=3 SV=1	hypothetical protein BN946_scf184844.g14 [Trametes cinnabarina]
EVM0009682.1	Biological Process: Mo-molybdopterin cofactor biosynthetic process (GO:0006777);	K03635|1.20344e-104|dsq:DICSQDRAFT_142348|molybdenum cofactor synthesis 2; K03635 molybdopterin synthase catalytic subunit [EC:2.8.1.12] (A)	[H]	Coenzyme transport and metabolism	MoaE protein	Molybdopterin synthase catalytic subunit {ECO:0000255|HAMAP-Rule:MF_03052} OS=Magnaporthe oryzae (strain 70-15 / ATCC MYA-4617 / FGSC 8958) PE=3 SV=1	Molybdopterin synthase catalytic subunit {ECO:0000256|HAMAP-Rule:MF_03052} OS=Phanerochaete carnosa (strain HHB-10118-sp) PE=3 SV=1	molybdenum cofactor synthesis 2 [Dichomitus squalens LYAD-421 SS1]
EVM0006603.1	--	--	[Z]	Cytoskeleton	Microtubule-associated protein CRIPT	--	Uncharacterized protein {ECO:0000313|EMBL:EJF57202.1} OS=Dichomitus squalens (strain LYAD-421) PE=4 SV=1	hypothetical protein DICSQDRAFT_69965 [Dichomitus squalens LYAD-421 SS1]
EVM0003200.1	Molecular Function: transferase activity, transferring acyl groups other than amino-acyl groups (GO:0016747);	K14457|7.83572e-107|dsq:DICSQDRAFT_167581|DAGAT-domain-containing protein; K14457 2-acylglycerol O-acyltransferase 2 [EC:2.3.1.22] (A)	[I]	Lipid transport and metabolism	Diacylglycerol acyltransferase	Diacylglycerol O-acyltransferase 2B GN=DGAT2B OS=Umbelopsis ramanniana (Oleaginous fungus) PE=1 SV=1	Uncharacterized protein {ECO:0000313|EMBL:EMD39095.1} OS=Ceriporiopsis subvermispora (strain B) PE=4 SV=1	DAGAT-domain-containing protein [Dichomitus squalens LYAD-421 SS1]
EVM0010684.1	--	--	[S]	Function unknown	Uncharacterised ACR, YagE family COG1723	Uncharacterized protein YDR282C GN=YDR282C OS=Saccharomyces cerevisiae (strain ATCC 204508 / S288c) PE=3 SV=1	Uncharacterized protein {ECO:0000313|EMBL:CDO73712.1} OS=Pycnoporus cinnabarinus (Cinnabar-red polypore) PE=4 SV=1	hypothetical protein DICSQDRAFT_153114 [Dichomitus squalens LYAD-421 SS1]
EVM0003719.1	--	--	--	--	--	--	Uncharacterized protein {ECO:0000313|EMBL:EJF60841.1} OS=Dichomitus squalens (strain LYAD-421) PE=4 SV=1	hypothetical protein DICSQDRAFT_181084 [Dichomitus squalens LYAD-421 SS1]
EVM0008188.1	--	--	--	--	--	--	Uncharacterized protein {ECO:0000313|EMBL:CDO78206.1} OS=Pycnoporus cinnabarinus (Cinnabar-red polypore) PE=4 SV=1	hypothetical protein DICSQDRAFT_51896 [Dichomitus squalens LYAD-421 SS1]
EVM0003802.1	--	--	--	--	Heterokaryon incompatibility protein (HET)	--	HET-domain-containing protein {ECO:0000313|EMBL:EJF57964.1} OS=Dichomitus squalens (strain LYAD-421) PE=4 SV=1	HET-domain-containing protein [Dichomitus squalens LYAD-421 SS1]
EVM0003118.1	--	--	--	--	--	--	Uncharacterized protein {ECO:0000313|EMBL:EJF59479.1} OS=Dichomitus squalens (strain LYAD-421) PE=4 SV=1	hypothetical protein DICSQDRAFT_172074 [Dichomitus squalens LYAD-421 SS1]
EVM0012181.1	--	--	[Q]	Secondary metabolites biosynthesis, transport and catabolism	short chain dehydrogenase	NADPH-dependent 1-acyldihydroxyacetone phosphate reductase GN=ayr1 OS=Schizosaccharomyces pombe (strain 972 / ATCC 24843) PE=3 SV=2	Uncharacterized protein {ECO:0000313|EMBL:CDO73057.1} OS=Pycnoporus cinnabarinus (Cinnabar-red polypore) PE=3 SV=1	NAD-P-binding protein [Trametes versicolor FP-101664 SS1]
EVM0007814.1	--	--	--	--	Arsenical pump membrane protein	--	Uncharacterized protein {ECO:0000313|EMBL:EJF57157.1} OS=Dichomitus squalens (strain LYAD-421) PE=4 SV=1	hypothetical protein DICSQDRAFT_157516 [Dichomitus squalens LYAD-421 SS1]
EVM0007526.1	--	--	--	--	--	--	Uncharacterized protein {ECO:0000313|EMBL:CDO75550.1} OS=Pycnoporus cinnabarinus (Cinnabar-red polypore) PE=4 SV=1	hypothetical protein DICSQDRAFT_80885 [Dichomitus squalens LYAD-421 SS1]
EVM0000869.1	--	--	[R]	General function prediction only	--	Transposon Tf2-9 polyprotein GN=Tf2-9 OS=Schizosaccharomyces pombe (strain 972 / ATCC 24843) PE=3 SV=1	Uncharacterized protein {ECO:0000313|EMBL:EEB89419.1} OS=Moniliophthora perniciosa (strain FA553 / isolate CP02) PE=4 SV=1	hypothetical protein MPER_12484 [Moniliophthora perniciosa FA553]
EVM0005319.1	Molecular Function: catalytic activity (GO:0003824);	K01792|0|dsq:DICSQDRAFT_75659|galactose mutarotase-like protein; K01792 glucose-6-phosphate 1-epimerase [EC:5.1.3.15] (A)	[G]	Carbohydrate transport and metabolism	Aldose 1-epimerase	Glucose-6-phosphate 1-epimerase GN=YMR099C OS=Saccharomyces cerevisiae (strain ATCC 204508 / S288c) PE=1 SV=1	Uncharacterized protein {ECO:0000313|EMBL:CCM01982.1} OS=Fibroporia radiculosa (strain TFFH 294) PE=4 SV=1	galactose mutarotase-like protein [Dichomitus squalens LYAD-421 SS1]
EVM0003149.1	--	--	--	--	--	--	Uncharacterized protein {ECO:0000313|EMBL:EIW51366.1} OS=Trametes versicolor (strain FP-101664) PE=4 SV=1	hypothetical protein TRAVEDRAFT_137512 [Trametes versicolor FP-101664 SS1]
EVM0000861.1	--	--	--	--	--	--	Uncharacterized protein {ECO:0000313|EMBL:EJF61491.1} OS=Dichomitus squalens (strain LYAD-421) PE=4 SV=1	hypothetical protein DICSQDRAFT_169905 [Dichomitus squalens LYAD-421 SS1]
EVM0006156.1	--	K17412|9.38751e-47|dsq:DICSQDRAFT_83538|hypothetical protein; K17412 small subunit ribosomal protein S34 (A)	--	--	--	--	Uncharacterized protein {ECO:0000313|EMBL:EMD40445.1} OS=Ceriporiopsis subvermispora (strain B) PE=4 SV=1	hypothetical protein TRAVEDRAFT_143871 [Trametes versicolor FP-101664 SS1]
EVM0005149.1	--	--	[L]	Replication, recombination and repair	hAT family C-terminal dimerisation region	--	Uncharacterized protein {ECO:0000313|EMBL:EJF60759.1} OS=Dichomitus squalens (strain LYAD-421) PE=4 SV=1	hypothetical protein PAXRUDRAFT_16219 [Paxillus rubicundulus Ve08.2h10]
EVM0012608.1	--	--	[Z]	Cytoskeleton	Regulator of Vps4 activity in the MVB pathway	Vacuolar protein sorting-associated protein IST1 GN=IST1 OS=Saccharomyces cerevisiae (strain ATCC 204508 / S288c) PE=1 SV=1	Uncharacterized protein {ECO:0000313|EMBL:EKM61469.1} OS=Phanerochaete carnosa (strain HHB-10118-sp) PE=4 SV=1	hypothetical protein DICSQDRAFT_176815 [Dichomitus squalens LYAD-421 SS1]
EVM0000354.1	--	--	[Y]	Nuclear structure	Iron only hydrogenase large subunit, C-terminal domain	Cytosolic Fe-S cluster assembly factor NAR1 GN=NAR1 OS=Cryptococcus neoformans var. neoformans serotype D (strain B-3501A) PE=3 SV=1	Uncharacterized protein {ECO:0000313|EMBL:KDQ53481.1} OS=Jaapia argillacea MUCL 33604 PE=4 SV=1	iron hydrogenase [Dichomitus squalens LYAD-421 SS1]
EVM0011402.1	Molecular Function: structural constituent of ribosome (GO:0003735); Cellular Component: ribosome (GO:0005840); Biological Process: translation (GO:0006412);	K02910|2.00044e-79|dsq:DICSQDRAFT_85835|60S ribosomal protein L31; K02910 large subunit ribosomal protein L31e (A)	[J]	Translation, ribosomal structure and biogenesis	Ribosomal protein L31e	60S ribosomal protein L31-B GN=RPL31B OS=Saccharomyces cerevisiae (strain ATCC 204508 / S288c) PE=1 SV=1	60S ribosomal protein L31 {ECO:0000313|EMBL:EJF61758.1} OS=Dichomitus squalens (strain LYAD-421) PE=4 SV=1	60S ribosomal protein L31 [Trametes versicolor FP-101664 SS1]
EVM0009170.2	--	K14544|0|dsq:DICSQDRAFT_157625|Nrap protein; K14544 U3 small nucleolar RNA-associated protein 22 (A)	[S]	Function unknown	Nrap protein	U3 small nucleolar RNA-associated protein 22 OS=Schizosaccharomyces pombe (strain 972 / ATCC 24843) PE=3 SV=1	Nrap protein {ECO:0000313|EMBL:EJF57013.1} OS=Dichomitus squalens (strain LYAD-421) PE=4 SV=1	Nrap protein [Dichomitus squalens LYAD-421 SS1]
EVM0012835.1	--	--	[R]	General function prediction only	RAM signalling pathway protein	Leucine-rich repeat-containing protein sog2 OS=Schizosaccharomyces pombe (strain 972 / ATCC 24843) PE=1 SV=1	Uncharacterized protein {ECO:0000313|EMBL:CDO72893.1} OS=Pycnoporus cinnabarinus (Cinnabar-red polypore) PE=4 SV=1	hypothetical protein DICSQDRAFT_97759 [Dichomitus squalens LYAD-421 SS1]
EVM0000486.1	Cellular Component: nucleus (GO:0005634);	K12877|7.6212e-106|dsq:DICSQDRAFT_183522|mago nashi; K12877 protein mago nashi (A)	[A]	RNA processing and modification	Mago nashi protein	Protein mago nashi homolog GN=mnh1 OS=Schizosaccharomyces pombe (strain 972 / ATCC 24843) PE=3 SV=1	Mago nashi {ECO:0000313|EMBL:EJF56963.1} OS=Dichomitus squalens (strain LYAD-421) PE=4 SV=1	mago nashi [Dichomitus squalens LYAD-421 SS1]
EVM0010235.1	--	--	--	--	--	--	Uncharacterized protein {ECO:0000313|EMBL:CDO71894.1} OS=Pycnoporus cinnabarinus (Cinnabar-red polypore) PE=4 SV=1	hypothetical protein BN946_scf184940.g41 [Trametes cinnabarina]
EVM0003507.1	--	--	--	--	--	--	Uncharacterized protein {ECO:0000313|EMBL:EJF61944.1} OS=Dichomitus squalens (strain LYAD-421) PE=4 SV=1	hypothetical protein DICSQDRAFT_59050 [Dichomitus squalens LYAD-421 SS1]
EVM0004103.1	--	--	--	--	--	--	Uncharacterized protein {ECO:0000313|EMBL:EJF60654.1} OS=Dichomitus squalens (strain LYAD-421) PE=4 SV=1	carbohydrate esterase family 16 protein [Plicaturopsis crispa FD-325 SS-3]
EVM0009280.1	Molecular Function: nucleic acid binding (GO:0003676); Biological Process: nucleobase-containing compound metabolic process (GO:0006139); Molecular Function: nucleotidyltransferase activity (GO:0016779);	K02350|0|dsq:DICSQDRAFT_176481|hypothetical protein; K02350 DNA polymerase zeta [EC:2.7.7.7] (A)	[L]	Replication, recombination and repair	DNA polymerase family B	DNA polymerase zeta catalytic subunit GN=REV3 OS=Saccharomyces cerevisiae (strain ATCC 204508 / S288c) PE=1 SV=1	DNA polymerase {ECO:0000256|RuleBase:RU000442} OS=Pycnoporus cinnabarinus (Cinnabar-red polypore) PE=3 SV=1	hypothetical protein DICSQDRAFT_176481 [Dichomitus squalens LYAD-421 SS1]
EVM0000337.1	--	--	--	--	--	--	Uncharacterized protein {ECO:0000313|EMBL:CDO77814.1} OS=Pycnoporus cinnabarinus (Cinnabar-red polypore) PE=4 SV=1	hypothetical protein TRAVEDRAFT_65501 [Trametes versicolor FP-101664 SS1]
EVM0004119.1	--	K15633|1.37643e-36|dsq:DICSQDRAFT_151721|cofactor-independent phosphoglycerate mutase; K15633 2,3-bisphosphoglycerate-independent phosphoglycerate mutase [EC:5.4.2.12] (A)	[G]	Carbohydrate transport and metabolism	Metalloenzyme superfamily	--	Uncharacterized protein {ECO:0000313|EMBL:EPS97803.1} OS=Fomitopsis pinicola (strain FP-58527) PE=3 SV=1	hypothetical protein FOMPIDRAFT_1024867 [Fomitopsis pinicola FP-58527 SS1]
EVM0004635.1	Biological Process: cellulose catabolic process (GO:0030245); Molecular Function: cellobiose glucosidase activity (GO:0080079);	K01188|0|dsq:DICSQDRAFT_101924|beta-glucosidase 1A; K01188 beta-glucosidase [EC:3.2.1.21] (A)	[G]	Carbohydrate transport and metabolism	Glycosyl hydrolase family 1	Beta-glucosidase 1B {ECO:0000303|PubMed:16896601, ECO:0000312|EMBL:BAE87009.1} OS=Phanerochaete chrysosporium (White-rot fungus) PE=1 SV=1	Uncharacterized protein {ECO:0000313|EMBL:CCM00730.1} OS=Fibroporia radiculosa (strain TFFH 294) PE=3 SV=1	beta-glucosidase 1A [Dichomitus squalens LYAD-421 SS1]
EVM0007890.1	Molecular Function: zinc ion binding (GO:0008270); Molecular Function: oxidoreductase activity, acting on the CH-OH group of donors, NAD or NADP as acceptor (GO:0016616); Molecular Function: cofactor binding (GO:0048037); Biological Process: oxidation-reduction process (GO:0055114);	--	[Q]	Secondary metabolites biosynthesis, transport and catabolism	Alcohol dehydrogenase GroES-like domain	NADP-dependent alcohol dehydrogenase 6 GN=ADH6 OS=Saccharomyces cerevisiae (strain ATCC 204508 / S288c) PE=1 SV=1	GroES-like protein {ECO:0000313|EMBL:EJF57780.1} OS=Dichomitus squalens (strain LYAD-421) PE=4 SV=1	GroES-like protein [Dichomitus squalens LYAD-421 SS1]
EVM0003082.1	--	--	--	--	F-box-like	--	Uncharacterized protein {ECO:0000313|EMBL:CDO69884.1} OS=Pycnoporus cinnabarinus (Cinnabar-red polypore) PE=4 SV=1	hypothetical protein DICSQDRAFT_82758 [Dichomitus squalens LYAD-421 SS1]
EVM0004968.1	--	--	--	--	--	--	Uncharacterized protein {ECO:0000313|EMBL:EJF59066.1} OS=Dichomitus squalens (strain LYAD-421) PE=4 SV=1	hypothetical protein DICSQDRAFT_172387 [Dichomitus squalens LYAD-421 SS1]
EVM0010890.2	--	--	--	--	--	--	Uncharacterized protein {ECO:0000313|EMBL:EJF55947.1} OS=Dichomitus squalens (strain LYAD-421) PE=4 SV=1	hypothetical protein DICSQDRAFT_94192 [Dichomitus squalens LYAD-421 SS1]
EVM0013126.1	--	--	--	--	BTB/POZ domain	--	Uncharacterized protein {ECO:0000313|EMBL:EJF58276.1} (Fragment) OS=Dichomitus squalens (strain LYAD-421) PE=4 SV=1	hypothetical protein DICSQDRAFT_17217, partial [Dichomitus squalens LYAD-421 SS1]
EVM0000340.1	--	--	--	--	--	--	Uncharacterized protein {ECO:0000313|EMBL:EJF56129.1} OS=Dichomitus squalens (strain LYAD-421) PE=4 SV=1	hypothetical protein DICSQDRAFT_141479 [Dichomitus squalens LYAD-421 SS1]
EVM0010222.1	--	K11982|1.92822e-168|dsq:DICSQDRAFT_76588|hypothetical protein; K11982 E3 ubiquitin-protein ligase RNF115/126 [EC:6.3.2.19] (A)	[O]	Posttranslational modification, protein turnover, chaperones	Ring finger domain	Uncharacterized RING finger protein P32A8.03c GN=SPAP32A8.03c OS=Schizosaccharomyces pombe (strain 972 / ATCC 24843) PE=3 SV=1	Uncharacterized protein {ECO:0000313|EMBL:CDO73110.1} OS=Pycnoporus cinnabarinus (Cinnabar-red polypore) PE=4 SV=1	hypothetical protein DICSQDRAFT_76588 [Dichomitus squalens LYAD-421 SS1]
EVM0007128.1	--	K15205|0|dsq:DICSQDRAFT_98155|hypothetical protein; K15205 transcription factor C subunit 6 (A)	--	--	WD domain, G-beta repeat	Transcription factor tau subunit sfc6 OS=Schizosaccharomyces pombe (strain 972 / ATCC 24843) PE=1 SV=1	Uncharacterized protein {ECO:0000313|EMBL:CDO73671.1} OS=Pycnoporus cinnabarinus (Cinnabar-red polypore) PE=4 SV=1	hypothetical protein DICSQDRAFT_98155 [Dichomitus squalens LYAD-421 SS1]
EVM0010440.1	--	--	[R]	General function prediction only	Ankyrin repeats (3 copies)	Ankyrin repeat-containing protein P16F5.05c GN=SPBP16F5.05c OS=Schizosaccharomyces pombe (strain 972 / ATCC 24843) PE=3 SV=1	Ankyrin {ECO:0000313|EMBL:EJF60735.1} OS=Dichomitus squalens (strain LYAD-421) PE=4 SV=1	ankyrin [Dichomitus squalens LYAD-421 SS1]
EVM0003286.1	--	--	--	--	--	--	Uncharacterized protein {ECO:0000313|EMBL:EJF60205.1} OS=Dichomitus squalens (strain LYAD-421) PE=4 SV=1	hypothetical protein DICSQDRAFT_171430 [Dichomitus squalens LYAD-421 SS1]
EVM0003463.1	--	K18168|5.56567e-85|dsq:DICSQDRAFT_64425|hypothetical protein; K18168 succinate dehydrogenase assembly factor 2 (A)	[S]	Function unknown	Flavinator of succinate dehydrogenase	Succinate dehydrogenase assembly factor 2, mitochondrial {ECO:0000255|HAMAP-Rule:MF_03057} (Precursor) GN=CNA04680 OS=Cryptococcus neoformans var. neoformans serotype D (strain JEC21 / PE=3 SV=1	Succinate dehydrogenase assembly factor 2, mitochondrial {ECO:0000256|HAMAP-Rule:MF_03057} OS=Dichomitus squalens (strain LYAD-421) PE=3 SV=1	hypothetical protein DICSQDRAFT_64425 [Dichomitus squalens LYAD-421 SS1]
EVM0001818.1	--	--	--	--	--	--	Uncharacterized protein {ECO:0000313|EMBL:EJF60732.1} OS=Dichomitus squalens (strain LYAD-421) PE=4 SV=1	hypothetical protein DICSQDRAFT_161922 [Dichomitus squalens LYAD-421 SS1]
EVM0008993.1	Biological Process: cellular protein modification process (GO:0006464); Cellular Component: cell part (GO:0044464); Biological Process: single-organism process (GO:0044699);	K08770|2.13849e-34|pfj:MYCFIDRAFT_60610|hypothetical protein; K08770 ubiquitin C (A)	[OR]	--	Ubiquitin family	Ubiquitin (Precursor) GN=UBI4 OS=Candida albicans (Yeast) PE=1 SV=1	Ubi4p {ECO:0000313|EMBL:EGA57707.1} OS=Saccharomyces cerevisiae (strain FostersB) PE=4 SV=1	Ubiquitin-like protein [Medicago truncatula]
EVM0001137.2	Cellular Component: cytoplasm (GO:0005737); Cellular Component: membrane (GO:0016020); Biological Process: Golgi vesicle transport (GO:0048193);	--	[U]	Intracellular trafficking, secretion, and vesicular transport	Uso1 / p115 like vesicle tethering protein, head region	Intracellular protein transport protein uso1 GN=uso1 OS=Schizosaccharomyces pombe (strain 972 / ATCC 24843) PE=3 SV=3	Uncharacterized protein {ECO:0000313|EMBL:EJF60729.1} OS=Dichomitus squalens (strain LYAD-421) PE=4 SV=1	hypothetical protein DICSQDRAFT_170873 [Dichomitus squalens LYAD-421 SS1]
EVM0005882.1	--	--	[S]	Function unknown	Uncharacterised conserved protein (DUF2315)	--	Uncharacterized protein {ECO:0000313|EMBL:CDO69522.1} OS=Pycnoporus cinnabarinus (Cinnabar-red polypore) PE=4 SV=1	hypothetical protein DICSQDRAFT_77787 [Dichomitus squalens LYAD-421 SS1]
EVM0009700.1	--	--	[L]	Replication, recombination and repair	hAT family C-terminal dimerisation region	--	Uncharacterized protein {ECO:0000313|EMBL:CDO75086.1} OS=Pycnoporus cinnabarinus (Cinnabar-red polypore) PE=4 SV=1	hypothetical protein M378DRAFT_18219, partial [Amanita muscaria Koide BX008]
EVM0000457.1	--	--	[CR]	--	--	Zinc-type alcohol dehydrogenase-like protein C1773.06c GN=SPBC1773.06c OS=Schizosaccharomyces pombe (strain 972 / ATCC 24843) PE=3 SV=1	Uncharacterized protein {ECO:0000313|EMBL:CDO68763.1} OS=Pycnoporus cinnabarinus (Cinnabar-red polypore) PE=4 SV=1	hypothetical protein BN946_scf184989.g29 [Trametes cinnabarina]
EVM0012498.4	Molecular Function: G-protein coupled receptor binding (GO:0001664); Molecular Function: GTPase activity (GO:0003924); Molecular Function: signal transducer activity (GO:0004871); Molecular Function: GTP binding (GO:0005525); Biological Process: obsolete GTP catabolic process (GO:0006184); Biological Process: adenylate cyclase-activating G-protein coupled receptor signaling pathway (GO:0007189); …	K04640|0|dsq:DICSQDRAFT_72482|heterotrimeric G protein alpha subunit 4; K04640 guanine nucleotide-binding protein subunit alpha, other (A)	[DT]	--	G-protein alpha subunit	Guanine nucleotide-binding protein alpha-2 subunit GN=GPA2 OS=Ustilago maydis (strain 521 / FGSC 9021) PE=3 SV=1	Heterotrimeric G protein alpha subunit 4 {ECO:0000313|EMBL:EJF55942.1} OS=Dichomitus squalens (strain LYAD-421) PE=4 SV=1	heterotrimeric G protein alpha subunit 4 [Dichomitus squalens LYAD-421 SS1]
EVM0000409.1	Cellular Component: nucleus (GO:0005634); Biological Process: ribosome biogenesis (GO:0042254);	K14852|8.75933e-159|ppl:POSPLDRAFT_88493|hypothetical protein; K14852 regulator of ribosome biosynthesis (A)	[J]	Translation, ribosomal structure and biogenesis	Ribosome biogenesis regulatory protein (RRS1)	Regulator of ribosome biosynthesis GN=RRS1 OS=Saccharomyces cerevisiae (strain ATCC 204508 / S288c) PE=1 SV=1	Uncharacterized protein {ECO:0000313|EMBL:CDO73793.1} OS=Pycnoporus cinnabarinus (Cinnabar-red polypore) PE=4 SV=1	hypothetical protein BN946_scf185015.g122 [Trametes cinnabarina]
EVM0008418.1	--	K08775|0|dsq:DICSQDRAFT_142816|hypothetical protein; K08775 breast cancer 2 susceptibility protein (A)	[L]	Replication, recombination and repair	BRCA2, oligonucleotide/oligosaccharide-binding, domain 1	--	Uncharacterized protein {ECO:0000313|EMBL:CDO73012.1} OS=Pycnoporus cinnabarinus (Cinnabar-red polypore) PE=4 SV=1	hypothetical protein DICSQDRAFT_142816 [Dichomitus squalens LYAD-421 SS1]
EVM0010394.1	Biological Process: protein folding (GO:0006457); Cellular Component: prefoldin complex (GO:0016272); Molecular Function: unfolded protein binding (GO:0051082);	K09549|2.40611e-74|dsq:DICSQDRAFT_58481|Prefoldin beta-like protein; K09549 prefoldin subunit 2 (A)	[O]	Posttranslational modification, protein turnover, chaperones	Prefoldin subunit	Probable prefoldin subunit 2 GN=SPAC227.10 OS=Schizosaccharomyces pombe (strain 972 / ATCC 24843) PE=3 SV=1	Prefoldin beta-like protein {ECO:0000313|EMBL:EJF62381.1} OS=Dichomitus squalens (strain LYAD-421) PE=4 SV=1	Prefoldin beta-like protein [Dichomitus squalens LYAD-421 SS1]
EVM0008616.1	--	--	[IR]	--	Methyltransferase domain	--	S-adenosyl-L-methionine-dependent methyltransferase {ECO:0000313|EMBL:EJF60557.1} (Fragment) OS=Dichomitus squalens (strain LYAD-421) PE=4 SV=1	S-adenosyl-L-methionine-dependent methyltransferase, partial [Dichomitus squalens LYAD-421 SS1]
EVM0007445.1	--	--	--	--	--	--	Uncharacterized protein {ECO:0000313|EMBL:EJF56655.1} OS=Dichomitus squalens (strain LYAD-421) PE=4 SV=1	hypothetical protein DICSQDRAFT_150308 [Dichomitus squalens LYAD-421 SS1]
EVM0001715.1	--	K17786|4.3561e-130|dsq:DICSQDRAFT_183610|hypothetical protein; K17786 mitochondrial organizing structure protein 2 (A)	--	--	Apolipoprotein O	MICOS subunit MIC26 GN=G8575 OS=Saccharomyces cerevisiae (strain ATCC 204508 / S288c) PE=1 SV=1	Uncharacterized protein {ECO:0000313|EMBL:EJF56807.1} OS=Dichomitus squalens (strain LYAD-421) PE=4 SV=1	hypothetical protein DICSQDRAFT_183610 [Dichomitus squalens LYAD-421 SS1]
EVM0007863.1	--	--	--	--	--	--	Uncharacterized protein {ECO:0000313|EMBL:CDO77715.1} OS=Pycnoporus cinnabarinus (Cinnabar-red polypore) PE=4 SV=1	hypothetical protein TRAVEDRAFT_64792 [Trametes versicolor FP-101664 SS1]
EVM0007390.1	--	--	--	--	--	--	--	hypothetical protein DICSQDRAFT_166059 [Dichomitus squalens LYAD-421 SS1]
EVM0000139.1	--	--	--	--	--	--	Uncharacterized protein {ECO:0000313|EMBL:EJF55526.1} OS=Dichomitus squalens (strain LYAD-421) PE=4 SV=1	hypothetical protein DICSQDRAFT_175800 [Dichomitus squalens LYAD-421 SS1]
EVM0004336.1	--	--	--	--	--	--	Uncharacterized protein {ECO:0000313|EMBL:EJF60984.1} OS=Dichomitus squalens (strain LYAD-421) PE=4 SV=1	hypothetical protein DICSQDRAFT_178829 [Dichomitus squalens LYAD-421 SS1]
EVM0001204.1	--	K11870|0|dsq:DICSQDRAFT_146528|cysteine proteinase; K11870 ubiquitin carboxyl-terminal hydrolase 1 [EC:3.4.19.12] (A)	--	--	Ubiquitin carboxyl-terminal hydrolase	Ubiquitin carboxyl-terminal hydrolase 16 GN=ubp16 OS=Emericella nidulans (strain FGSC A4 / ATCC 38163 / CBS 112.46 / NRRL PE=3 SV=1	Cysteine proteinase {ECO:0000313|EMBL:EJF62254.1} OS=Dichomitus squalens (strain LYAD-421) PE=4 SV=1	cysteine proteinase [Dichomitus squalens LYAD-421 SS1]
EVM0011243.1	--	--	--	--	--	--	Uncharacterized protein {ECO:0000313|EMBL:CDO69836.1} OS=Pycnoporus cinnabarinus (Cinnabar-red polypore) PE=4 SV=1	hypothetical protein TRAVEDRAFT_42698 [Trametes versicolor FP-101664 SS1]
EVM0008237.1	--	K14306|0|dsq:DICSQDRAFT_163813|hypothetical protein; K14306 nuclear pore complex protein Nup62 (A)	[Y]	Nuclear structure	Nsp1-like C-terminal region	Nucleoporin nsp1 GN=nsp1 OS=Schizosaccharomyces pombe (strain 972 / ATCC 24843) PE=1 SV=1	Uncharacterized protein {ECO:0000313|EMBL:EJF56592.1} OS=Dichomitus squalens (strain LYAD-421) PE=4 SV=1	hypothetical protein DICSQDRAFT_163813 [Dichomitus squalens LYAD-421 SS1]
EVM0006264.1	--	--	[S]	Function unknown	Protein of unknown function (DUF788)	Meiotically up-regulated gene 69 protein GN=mug69 OS=Schizosaccharomyces pombe (strain 972 / ATCC 24843) PE=1 SV=4	Uncharacterized protein {ECO:0000313|EMBL:CDO74004.1} OS=Pycnoporus cinnabarinus (Cinnabar-red polypore) PE=4 SV=1	putative opsin [Dichomitus squalens LYAD-421 SS1]
EVM0007812.2	--	--	--	--	--	--	Uncharacterized protein {ECO:0000313|EMBL:EJF56166.1} OS=Dichomitus squalens (strain LYAD-421) PE=4 SV=1	hypothetical protein DICSQDRAFT_93916 [Dichomitus squalens LYAD-421 SS1]
EVM0003730.1	--	K09602|6.47346e-106|gtr:GLOTRDRAFT_60500|cysteine proteinase; K09602 ubiquitin thioesterase protein OTUB1 [EC:3.4.19.12] (A)	[S]	Function unknown	Peptidase C65 Otubain	--	Uncharacterized protein {ECO:0000313|EMBL:CDO70422.1} OS=Pycnoporus cinnabarinus (Cinnabar-red polypore) PE=4 SV=1	hypothetical protein BN946_scf184999.g63 [Trametes cinnabarina]
EVM0011471.1	Molecular Function: transferase activity, transferring phosphorus-containing groups (GO:0016772);	K08869|0|dsq:DICSQDRAFT_66527|ABC1-domain-containing protein; K08869 aarF domain-containing kinase (A)	[R]	General function prediction only	ABC1 family	Protein ABC1 homolog, mitochondrial (Precursor) GN=abc1 OS=Schizosaccharomyces pombe (strain 972 / ATCC 24843) PE=2 SV=1	ABC1-domain-containing protein {ECO:0000313|EMBL:EJF58716.1} OS=Dichomitus squalens (strain LYAD-421) PE=4 SV=1	ABC1-domain-containing protein [Dichomitus squalens LYAD-421 SS1]
EVM0004541.1	Biological Process: phospholipid biosynthetic process (GO:0008654); Cellular Component: membrane (GO:0016020); Molecular Function: phosphotransferase activity, for other substituted phosphate groups (GO:0016780);	K00993|0|dsq:DICSQDRAFT_131616|Choline/ethanolaminephosphotransferase; K00993 ethanolaminephosphotransferase [EC:2.7.8.1] (A)	[I]	Lipid transport and metabolism	CDP-alcohol phosphatidyltransferase	Uncharacterized CDP-alcohol phosphatidyltransferase class-I family protein C22A12.10 GN=SPAC22A12.10 OS=Schizosaccharomyces pombe (strain 972 / ATCC 24843) PE=3 SV=1	Uncharacterized protein {ECO:0000313|EMBL:EMD42276.1} OS=Ceriporiopsis subvermispora (strain B) PE=3 SV=1	Choline/ethanolaminephosphotransferase [Dichomitus squalens LYAD-421 SS1]
EVM0011956.1	--	--	[R]	General function prediction only	Sugar (and other) transporter	High-affinity glucose transporter GN=HGT1 OS=Kluyveromyces lactis (strain ATCC 8585 / CBS 2359 / DSM 70799 / NBRC PE=3 SV=1	General substrate transporter {ECO:0000313|EMBL:EJF59515.1} OS=Dichomitus squalens (strain LYAD-421) PE=3 SV=1	general substrate transporter [Dichomitus squalens LYAD-421 SS1]
EVM0001916.1	--	--	--	--	--	--	Uncharacterized protein {ECO:0000313|EMBL:EJF55692.1} OS=Dichomitus squalens (strain LYAD-421) PE=4 SV=1	hypothetical protein TRAVEDRAFT_51610 [Trametes versicolor FP-101664 SS1]
EVM0007959.1	--	--	--	--	--	--	Uncharacterized protein {ECO:0000313|EMBL:EJF59502.1} OS=Dichomitus squalens (strain LYAD-421) PE=4 SV=1	hypothetical protein DICSQDRAFT_171904 [Dichomitus squalens LYAD-421 SS1]
EVM0002604.1	Molecular Function: protein kinase activity (GO:0004672); Biological Process: primary metabolic process (GO:0044238); Biological Process: cellular macromolecule metabolic process (GO:0044260);	K08852|1.72677e-51|dsq:DICSQDRAFT_113101|hypothetical protein; K08852 serine/threonine-protein kinase/endoribonuclease IRE1 [EC:2.7.11.1 3.1.26.-] (A)	[T]	Signal transduction mechanisms	Protein kinase domain	Serine/threonine-protein kinase ppk4 (Precursor) GN=ppk4 OS=Schizosaccharomyces pombe (strain 972 / ATCC 24843) PE=3 SV=1	Uncharacterized protein {ECO:0000313|EMBL:EJF56482.1} OS=Dichomitus squalens (strain LYAD-421) PE=4 SV=1	hypothetical protein TRAVEDRAFT_174175 [Trametes versicolor FP-101664 SS1]
EVM0007157.1	--	--	--	--	--	--	Uncharacterized protein {ECO:0000313|EMBL:CDO69792.1} OS=Pycnoporus cinnabarinus (Cinnabar-red polypore) PE=4 SV=1	hypothetical protein DICSQDRAFT_167573 [Dichomitus squalens LYAD-421 SS1]
EVM0000424.1	Molecular Function: threonine-type endopeptidase activity (GO:0004298); Cellular Component: nucleus (GO:0005634); Cellular Component: cytoplasm (GO:0005737); Biological Process: ubiquitin-dependent protein catabolic process (GO:0006511); Cellular Component: proteasome core complex, alpha-subunit complex (GO:0019773);	K02729|6.02783e-176|dsq:DICSQDRAFT_131813|proteasome subunit alpha type 5; K02729 20S proteasome subunit alpha 5 [EC:3.4.25.1] (A)	[O]	Posttranslational modification, protein turnover, chaperones	Proteasome subunit	Probable proteasome subunit alpha type-5 GN=pup2 OS=Schizosaccharomyces pombe (strain 972 / ATCC 24843) PE=1 SV=1	Proteasome subunit alpha type {ECO:0000256|RuleBase:RU000551} OS=Pycnoporus cinnabarinus (Cinnabar-red polypore) PE=3 SV=1	proteasome subunit alpha type 5 [Dichomitus squalens LYAD-421 SS1]
EVM0000842.1	--	--	--	--	--	--	Uncharacterized protein {ECO:0000313|EMBL:EJF57811.1} OS=Dichomitus squalens (strain LYAD-421) PE=4 SV=1	hypothetical protein DICSQDRAFT_173555 [Dichomitus squalens LYAD-421 SS1]
EVM0006886.1	Molecular Function: metal ion binding (GO:0046872);	--	[TZ]	--	RhoGAP domain	Rho-type GTPase-activating protein 1 GN=rga1 OS=Schizosaccharomyces pombe (strain 972 / ATCC 24843) PE=1 SV=1	Uncharacterized protein {ECO:0000313|EMBL:CDO73280.1} OS=Pycnoporus cinnabarinus (Cinnabar-red polypore) PE=4 SV=1	RhoGAP-domain-containing protein [Dichomitus squalens LYAD-421 SS1]
EVM0013131.1	Biological Process: single-organism cellular process (GO:0044763);	K16732|0|dsq:DICSQDRAFT_178963|hypothetical protein; K16732 protein regulator of cytokinesis 1 (A)	[DZ]	--	Microtubule associated protein (MAP65/ASE1 family)	Anaphase spindle elongation protein 1 GN=ase1 OS=Schizosaccharomyces pombe (strain 972 / ATCC 24843) PE=1 SV=1	Uncharacterized protein {ECO:0000313|EMBL:CDO70098.1} OS=Pycnoporus cinnabarinus (Cinnabar-red polypore) PE=4 SV=1	hypothetical protein DICSQDRAFT_178963 [Dichomitus squalens LYAD-421 SS1]
EVM0002693.1	--	--	--	--	--	--	Uncharacterized protein {ECO:0000313|EMBL:EIW51828.1} OS=Trametes versicolor (strain FP-101664) PE=4 SV=1	hypothetical protein TRAVEDRAFT_49590 [Trametes versicolor FP-101664 SS1]
EVM0002308.1	Molecular Function: binding (GO:0005488); Molecular Function: oxidoreductase activity (GO:0016491);	--	[Q]	Secondary metabolites biosynthesis, transport and catabolism	Cytochrome P450	NADPH--cytochrome P450 reductase GN=CYP505 OS=Fusarium oxysporum (Fusarium vascular wilt) PE=1 SV=1	Cytochrome P450 {ECO:0000313|EMBL:EJF62016.1} OS=Dichomitus squalens (strain LYAD-421) PE=3 SV=1	cytochrome P450 [Dichomitus squalens LYAD-421 SS1]
EVM0007231.2	Molecular Function: protein serine/threonine kinase activity (GO:0004674); Molecular Function: ATP binding (GO:0005524); Biological Process: protein phosphorylation (GO:0006468);	--	[D]	Cell cycle control, cell division, chromosome partitioning	Protein kinase domain	Serine/threonine-protein kinase oca2 OS=Schizosaccharomyces pombe (strain 972 / ATCC 24843) PE=1 SV=1	Uncharacterized protein {ECO:0000313|EMBL:CDO71241.1} OS=Pycnoporus cinnabarinus (Cinnabar-red polypore) PE=3 SV=1	Pkinase-domain-containing protein [Trametes versicolor FP-101664 SS1]
EVM0004076.1	--	K01379|0|dsq:DICSQDRAFT_127694|protease; K01379 cathepsin D [EC:3.4.23.5] (A)	[O]	Posttranslational modification, protein turnover, chaperones	Eukaryotic aspartyl protease	Aspartic protease {ECO:0000303|PubMed:10091328, ECO:0000312|EMBL:AAC17105.1} (Precursor) OS=Phaffia rhodozyma (Yeast) PE=1 SV=1	Protease {ECO:0000313|EMBL:EJF60406.1} OS=Dichomitus squalens (strain LYAD-421) PE=3 SV=1	protease [Dichomitus squalens LYAD-421 SS1]
EVM0012437.1	--	--	--	--	--	--	Uncharacterized protein {ECO:0000313|EMBL:EIW51396.1} OS=Trametes versicolor (strain FP-101664) PE=4 SV=1	hypothetical protein TRAVEDRAFT_21311 [Trametes versicolor FP-101664 SS1]
EVM0008996.1	--	K16572|0|dsq:DICSQDRAFT_169361|hypothetical protein; K16572 gamma-tubulin complex component 5 (A)	[S]	Function unknown	Spc97 / Spc98 family	--	Uncharacterized protein {ECO:0000313|EMBL:EJF62328.1} OS=Dichomitus squalens (strain LYAD-421) PE=4 SV=1	hypothetical protein DICSQDRAFT_169361 [Dichomitus squalens LYAD-421 SS1]
EVM0012247.1	Molecular Function: glucose-6-phosphate isomerase activity (GO:0004347); Cellular Component: cytoplasm (GO:0005737); Biological Process: gluconeogenesis (GO:0006094); Biological Process: glycolytic process (GO:0006096);	K01810|0|dsq:DICSQDRAFT_183613|glucose-6-phosphate isomerase; K01810 glucose-6-phosphate isomerase [EC:5.3.1.9] (A)	[G]	Carbohydrate transport and metabolism	Phosphoglucose isomerase	Glucose-6-phosphate isomerase GN=gpi1 OS=Agaricus bisporus (White button mushroom) PE=3 SV=1	Glucose-6-phosphate isomerase {ECO:0000256|RuleBase:RU000612} OS=Dichomitus squalens (strain LYAD-421) PE=3 SV=1	glucose-6-phosphate isomerase [Dichomitus squalens LYAD-421 SS1]
EVM0008152.1	Molecular Function: cation binding (GO:0043169);	--	[EH]	--	Thiamine pyrophosphate enzyme, N-terminal TPP binding domain	Acetolactate synthase, mitochondrial (Precursor) GN=ilv1 OS=Schizosaccharomyces pombe (strain 972 / ATCC 24843) PE=3 SV=2	Thiamin diphosphate-binding protein {ECO:0000313|EMBL:EJF57888.1} (Fragment) OS=Dichomitus squalens (strain LYAD-421) PE=3 SV=1	Thiamin diphosphate-binding protein, partial [Dichomitus squalens LYAD-421 SS1]
EVM0004923.1	Cellular Component: spindle microtubule (GO:0005876); Biological Process: mitotic spindle organization in nucleus (GO:0030472); Cellular Component: DASH complex (GO:0042729);	K11572|6.97114e-56|shs:STEHIDRAFT_81146|hypothetical protein; K11572 DASH complex subunit SPC19 (A)	--	--	Spc19	DASH complex subunit SPC19 GN=SPC19 OS=Debaryomyces hansenii (strain ATCC 36239 / CBS 767 / JCM 1990 / NBRC PE=3 SV=2	Uncharacterized protein {ECO:0000313|EMBL:EPS98738.1} OS=Fomitopsis pinicola (strain FP-58527) PE=4 SV=1	hypothetical protein FOMPIDRAFT_126458 [Fomitopsis pinicola FP-58527 SS1]
EVM0007054.1	--	--	--	--	--	--	Uncharacterized protein {ECO:0000313|EMBL:EJF58287.1} OS=Dichomitus squalens (strain LYAD-421) PE=4 SV=1	hypothetical protein DICSQDRAFT_173108 [Dichomitus squalens LYAD-421 SS1]
EVM0001539.1	--	--	[CR]	--	FAD binding domain	Kynurenine 3-monooxygenase {ECO:0000255|HAMAP-Rule:MF_03018} GN=YBL098W OS=Saccharomyces cerevisiae (strain ATCC 204508 / S288c) PE=1 SV=1	Monooxygenase {ECO:0000313|EMBL:EJF58085.1} OS=Dichomitus squalens (strain LYAD-421) PE=4 SV=1	monooxygenase [Dichomitus squalens LYAD-421 SS1]
EVM0008041.1	--	--	--	--	OTT_1508-like deaminase	--	--	hypothetical protein PILCRDRAFT_139131 [Piloderma croceum F 1598]
EVM0007285.1	--	--	[R]	General function prediction only	Cyclin	Nuc-1 negative regulatory protein preg GN=preg OS=Neurospora crassa (strain ATCC 24698 / 74-OR23-1A / CBS 708.71 / DSM PE=1 SV=1	Uncharacterized protein {ECO:0000313|EMBL:EKM53962.1} OS=Phanerochaete carnosa (strain HHB-10118-sp) PE=4 SV=1	cyclin-domain-containing protein [Dichomitus squalens LYAD-421 SS1]
EVM0008412.1	--	--	--	--	--	--	Uncharacterized protein {ECO:0000313|EMBL:EJF62401.1} OS=Dichomitus squalens (strain LYAD-421) PE=4 SV=1	hypothetical protein DICSQDRAFT_126642 [Dichomitus squalens LYAD-421 SS1]
EVM0009695.1	--	--	--	--	--	--	--	hypothetical protein DICSQDRAFT_166896 [Dichomitus squalens LYAD-421 SS1]
EVM0002931.1	--	--	--	--	--	--	Uncharacterized protein {ECO:0000313|EMBL:EJF58042.1} OS=Dichomitus squalens (strain LYAD-421) PE=4 SV=1	--
EVM0008860.1	Molecular Function: metal ion binding (GO:0046872);	K12827|0|dsq:DICSQDRAFT_93488|RNA splicing factor PRP9; K12827 splicing factor 3A subunit 3 (A)	[A]	RNA processing and modification	Domain of unknown function (DUF3449)	Pre-mRNA-splicing factor sap61 GN=sap61 OS=Schizosaccharomyces pombe (strain 972 / ATCC 24843) PE=1 SV=1	RNA splicing factor PRP9 {ECO:0000313|EMBL:EJF56615.1} OS=Dichomitus squalens (strain LYAD-421) PE=4 SV=1	RNA splicing factor PRP9 [Dichomitus squalens LYAD-421 SS1]
EVM0010045.2	--	--	--	--	Heterokaryon incompatibility protein (HET)	Vegetative incompatibility protein HET-E-1 GN=HET-E1 OS=Podospora anserina (Pleurage anserina) PE=3 SV=1	HET-domain-containing protein {ECO:0000313|EMBL:EJF60426.1} OS=Dichomitus squalens (strain LYAD-421) PE=4 SV=1	HET-domain-containing protein [Dichomitus squalens LYAD-421 SS1]
EVM0007941.1	--	--	[Z]	Cytoskeleton	Actin	Actin-related protein 4 GN=ARP4 OS=Ustilago maydis (strain 521 / FGSC 9021) PE=3 SV=1	Uncharacterized protein {ECO:0000313|EMBL:CDO74032.1} OS=Pycnoporus cinnabarinus (Cinnabar-red polypore) PE=3 SV=1	brg1-associated factor b [Dichomitus squalens LYAD-421 SS1]
EVM0003743.1	--	--	--	--	BTB/POZ domain	--	Uncharacterized protein {ECO:0000313|EMBL:EJF56009.1} OS=Dichomitus squalens (strain LYAD-421) PE=4 SV=1	hypothetical protein DICSQDRAFT_141590 [Dichomitus squalens LYAD-421 SS1]
EVM0003428.1	--	--	--	--	F-box-like	--	Uncharacterized protein {ECO:0000313|EMBL:EJF57957.1} OS=Dichomitus squalens (strain LYAD-421) PE=4 SV=1	hypothetical protein DICSQDRAFT_182887 [Dichomitus squalens LYAD-421 SS1]
EVM0008895.1	--	--	--	--	--	--	Uncharacterized protein {ECO:0000313|EMBL:EPQ53271.1} OS=Gloeophyllum trabeum (strain ATCC 11539 / FP-39264 / Madison 617) PE=4 SV=1	hypothetical protein TRAVEDRAFT_22528 [Trametes versicolor FP-101664 SS1]
EVM0006828.2	--	--	--	--	PQ loop repeat	Uncharacterized protein C4C5.03 GN=SPAC4C5.03 OS=Schizosaccharomyces pombe (strain 972 / ATCC 24843) PE=4 SV=1	Uncharacterized protein {ECO:0000313|EMBL:EJF59669.1} OS=Dichomitus squalens (strain LYAD-421) PE=4 SV=1	hypothetical protein DICSQDRAFT_138398 [Dichomitus squalens LYAD-421 SS1]
EVM0003556.1	--	--	--	--	--	--	--	hypothetical protein TRAVEDRAFT_21704 [Trametes versicolor FP-101664 SS1]
EVM0004745.1	--	K03132|0|dsq:DICSQDRAFT_132040|hypothetical protein; K03132 transcription initiation factor TFIID subunit 7 (A)	[K]	Transcription	TAFII55 protein conserved region	Transcription initiation factor TFIID subunit 7 GN=taf7 OS=Schizosaccharomyces pombe (strain 972 / ATCC 24843) PE=1 SV=1	Uncharacterized protein {ECO:0000313|EMBL:CDO68302.1} OS=Pycnoporus cinnabarinus (Cinnabar-red polypore) PE=4 SV=1	hypothetical protein DICSQDRAFT_132040 [Dichomitus squalens LYAD-421 SS1]
EVM0002460.1	Molecular Function: catalytic activity (GO:0003824);	--	--	--	Fungal family of unknown function (DUF1776)	--	Uncharacterized protein {ECO:0000313|EMBL:CDO77931.1} OS=Pycnoporus cinnabarinus (Cinnabar-red polypore) PE=4 SV=1	hypothetical protein BN946_scf184679.g10 [Trametes cinnabarina]
EVM0005110.1	--	--	--	--	--	--	--	hypothetical protein TRAVEDRAFT_26484 [Trametes versicolor FP-101664 SS1]
EVM0007644.2	--	--	[QI]	--	Cytochrome P450	Tryprostatin B 6-hydroxylase GN=ftmP450-1 OS=Neosartorya fumigata (strain ATCC MYA-4609 / Af293 / CBS 101355 / FGSC PE=3 SV=2	High nitrogen upregulated cytochrome P450 monooxygenase 2 {ECO:0000313|EMBL:EJF55648.1} OS=Dichomitus squalens (strain LYAD-421) PE=3 SV=1	high nitrogen upregulated cytochrome P450 monooxygenase 2 [Dichomitus squalens LYAD-421 SS1]
EVM0013266.1	--	--	--	--	WH2 motif	--	Uncharacterized protein {ECO:0000313|EMBL:EJF61233.1} OS=Dichomitus squalens (strain LYAD-421) PE=4 SV=1	hypothetical protein DICSQDRAFT_155314 [Dichomitus squalens LYAD-421 SS1]
EVM0009325.1	--	--	[G]	Carbohydrate transport and metabolism	Major Facilitator Superfamily	Uncharacterized transporter C11D3.18C GN=SPAC11D3.18c OS=Schizosaccharomyces pombe (strain 972 / ATCC 24843) PE=3 SV=1	Uncharacterized protein {ECO:0000313|EMBL:CDO69415.1} OS=Pycnoporus cinnabarinus (Cinnabar-red polypore) PE=4 SV=1	hypothetical protein BN946_scf184791.g10 [Trametes cinnabarina]
EVM0007253.1	--	--	--	--	--	--	Uncharacterized protein {ECO:0000313|EMBL:EJF61948.1} OS=Dichomitus squalens (strain LYAD-421) PE=4 SV=1	hypothetical protein TRAVEDRAFT_29827 [Trametes versicolor FP-101664 SS1]
EVM0002638.1	--	--	--	--	--	--	Uncharacterized protein {ECO:0000313|EMBL:EJF59434.1} OS=Dichomitus squalens (strain LYAD-421) PE=4 SV=1	hypothetical protein TRAVEDRAFT_61213 [Trametes versicolor FP-101664 SS1]
EVM0006148.1	--	--	--	--	Heterokaryon incompatibility protein (HET)	--	Uncharacterized protein {ECO:0000313|EMBL:EEB91665.1} (Fragment) OS=Moniliophthora perniciosa (strain FA553 / isolate CP02) PE=4 SV=1	hypothetical protein HYDPIDRAFT_119193 [Hydnomerulius pinastri MD-312]
EVM0012647.1	--	K17970|0|dsq:DICSQDRAFT_67021|WD40 repeat-like protein; K17970 mitochondrial division protein 1 (A)	[R]	General function prediction only	WD domain, G-beta repeat	Mitochondrial division protein 1 GN=MDV1 OS=Cryptococcus neoformans var. neoformans serotype D (strain JEC21 / PE=3 SV=1	Uncharacterized protein {ECO:0000313|EMBL:CDO70898.1} OS=Pycnoporus cinnabarinus (Cinnabar-red polypore) PE=4 SV=1	hypothetical protein BN946_scf184829.g6 [Trametes cinnabarina]
EVM0004037.1	--	--	--	--	--	--	Uncharacterized protein {ECO:0000313|EMBL:EJF57040.1} OS=Dichomitus squalens (strain LYAD-421) PE=4 SV=1	hypothetical protein DICSQDRAFT_183445 [Dichomitus squalens LYAD-421 SS1]
EVM0012136.1	Molecular Function: kinase activity (GO:0016301); Biological Process: phosphorylation (GO:0016310);	K17541|0|dsq:DICSQDRAFT_49968|other/SCY1 protein kinase; K17541 SCY1-like protein 2 (A)	[T]	Signal transduction mechanisms	Protein kinase domain	Protein kinase domain-containing protein ppk32 GN=ppk32 OS=Schizosaccharomyces pombe (strain 972 / ATCC 24843) PE=1 SV=1	Uncharacterized protein {ECO:0000313|EMBL:EPT00156.1} OS=Fomitopsis pinicola (strain FP-58527) PE=4 SV=1	other/SCY1 protein kinase [Dichomitus squalens LYAD-421 SS1]
EVM0010478.1	--	--	--	--	Protein of unknown function (DUF2462)	UPF0390 protein CND04920 GN=CND04920 OS=Cryptococcus neoformans var. neoformans serotype D (strain JEC21 / PE=3 SV=1	Uncharacterized protein {ECO:0000313|EMBL:EKM51979.1} OS=Phanerochaete carnosa (strain HHB-10118-sp) PE=4 SV=1	hypothetical protein PHACADRAFT_262420 [Phanerochaete carnosa HHB-10118-sp]
EVM0010818.1	Molecular Function: 5-methyltetrahydropteroyltriglutamate-homocysteine S-methyltransferase activity (GO:0003871); Biological Process: methionine biosynthetic process (GO:0009086);	--	--	--	Cobalamin-independent synthase, Catalytic domain	--	Putative methionine synthase vitamin-b12 independent protein {ECO:0000313|EMBL:EOD44406.1} OS=Botryosphaeria parva (strain UCR-NP2) PE=4 SV=1	putative methionine synthase vitamin-b12 independent protein [Neofusicoccum parvum UCRNP2]
EVM0007561.1	--	--	--	--	Dioxygenase	--	Uncharacterized protein {ECO:0000313|EMBL:CDO77203.1} OS=Pycnoporus cinnabarinus (Cinnabar-red polypore) PE=4 SV=1	hypothetical protein BN946_scf184747.g16 [Trametes cinnabarina]
EVM0003699.1	--	--	[R]	General function prediction only	Homeobox domain	Homeobox protein HD-9 GN=HD-9 OS=Encephalitozoon cuniculi (strain GB-M1) PE=3 SV=1	Uncharacterized protein {ECO:0000313|EMBL:CDO73034.1} OS=Pycnoporus cinnabarinus (Cinnabar-red polypore) PE=4 SV=1	homeobox-domain-containing protein [Dichomitus squalens LYAD-421 SS1]
EVM0002031.1	Molecular Function: hydrolase activity, hydrolyzing O-glycosyl compounds (GO:0004553); Biological Process: carbohydrate metabolic process (GO:0005975);	K01192|0|dsq:DICSQDRAFT_46134|glycoside hydrolase; K01192 beta-mannosidase [EC:3.2.1.25] (A)	[G]	Carbohydrate transport and metabolism	--	Beta-mannosidase A (Precursor) GN=mndA OS=Aspergillus terreus (strain NIH 2624 / FGSC A1156) PE=3 SV=2	Glycoside hydrolase family 2 protein {ECO:0000313|EMBL:EMD33695.1} OS=Ceriporiopsis subvermispora (strain B) PE=4 SV=1	glycoside hydrolase [Dichomitus squalens LYAD-421 SS1]
EVM0008851.1	Biological Process: transport (GO:0006810); Cellular Component: membrane (GO:0016020);	--	[C]	Energy production and conversion	Mitochondrial carrier protein	Peroxisomal adenine nucleotide transporter 1 GN=ANT1 OS=Saccharomyces cerevisiae (strain ATCC 204508 / S288c) PE=1 SV=1	Uncharacterized protein {ECO:0000313|EMBL:EMD33889.1} OS=Ceriporiopsis subvermispora (strain B) PE=3 SV=1	adenine nucleotide transporter [Dichomitus squalens LYAD-421 SS1]
EVM0000289.1	--	--	--	--	--	--	Uncharacterized protein {ECO:0000313|EMBL:EJF58097.1} OS=Dichomitus squalens (strain LYAD-421) PE=4 SV=1	hypothetical protein DICSQDRAFT_110833 [Dichomitus squalens LYAD-421 SS1]
EVM0008423.1	--	--	--	--	--	--	Uncharacterized protein {ECO:0000313|EMBL:CDO76728.1} OS=Pycnoporus cinnabarinus (Cinnabar-red polypore) PE=4 SV=1	hypothetical protein BN946_scf184796.g22 [Trametes cinnabarina]
EVM0009848.2	Biological Process: tRNA dihydrouridine synthesis (GO:0002943); Molecular Function: tRNA dihydrouridine synthase activity (GO:0017150); Molecular Function: flavin adenine dinucleotide binding (GO:0050660); Biological Process: oxidation-reduction process (GO:0055114);	K05543|0|dsq:DICSQDRAFT_131815|FMN-linked oxidoreductase; K05543 tRNA-dihydrouridine synthase 2 [EC:1.3.1.91] (A)	[J]	Translation, ribosomal structure and biogenesis	Dihydrouridine synthase (Dus)	tRNA-dihydrouridine(20) synthase [NAD(P)+] GN=dus2 OS=Schizosaccharomyces pombe (strain 972 / ATCC 24843) PE=3 SV=1	Uncharacterized protein {ECO:0000313|EMBL:CDO77279.1} OS=Pycnoporus cinnabarinus (Cinnabar-red polypore) PE=4 SV=1	FMN-linked oxidoreductase [Dichomitus squalens LYAD-421 SS1]
EVM0011032.1	--	--	--	--	--	--	Uncharacterized protein {ECO:0000313|EMBL:CDO75904.1} OS=Pycnoporus cinnabarinus (Cinnabar-red polypore) PE=4 SV=1	hypothetical protein BN946_scf184768.g6 [Trametes cinnabarina]
EVM0008131.1	--	--	--	--	BTB/POZ domain	--	Uncharacterized protein {ECO:0000313|EMBL:EJF58276.1} (Fragment) OS=Dichomitus squalens (strain LYAD-421) PE=4 SV=1	hypothetical protein DICSQDRAFT_17217, partial [Dichomitus squalens LYAD-421 SS1]
EVM0008619.1	--	K03649|2.89164e-85|dsq:DICSQDRAFT_67668|DNA glycosylase; K03649 TDG/mug DNA glycosylase family protein [EC:3.2.2.-] (A)	[L]	Replication, recombination and repair	Uracil DNA glycosylase superfamily	G/U mismatch-specific uracil DNA glycosylase GN=thp1 OS=Schizosaccharomyces pombe (strain 972 / ATCC 24843) PE=3 SV=1	Uncharacterized protein {ECO:0000313|EMBL:CDO72827.1} OS=Pycnoporus cinnabarinus (Cinnabar-red polypore) PE=4 SV=1	hypothetical protein BN946_scf185002.g12 [Trametes cinnabarina]
EVM0010848.1	--	K11593|0|dsq:DICSQDRAFT_155289|argonaute-like protein; K11593 eukaryotic translation initiation factor 2C (A)	[J]	Translation, ribosomal structure and biogenesis	Piwi domain	Protein argonaute GN=ago1 OS=Schizosaccharomyces pombe (strain 972 / ATCC 24843) PE=1 SV=1	Argonaute-like protein {ECO:0000313|EMBL:EJF61200.1} OS=Dichomitus squalens (strain LYAD-421) PE=4 SV=1	argonaute-like protein [Dichomitus squalens LYAD-421 SS1]
EVM0005531.2	--	--	--	--	--	--	Uncharacterized protein {ECO:0000313|EMBL:EJF58958.1} OS=Dichomitus squalens (strain LYAD-421) PE=4 SV=1	hypothetical protein DICSQDRAFT_138856 [Dichomitus squalens LYAD-421 SS1]
EVM0009467.1	--	K15634|6.01091e-110|dsq:DICSQDRAFT_98036|phosphoglycerate mutase-like protein; K15634 probable phosphoglycerate mutase [EC:5.4.2.12] (A)	[G]	Carbohydrate transport and metabolism	Histidine phosphatase superfamily (branch 1)	Probable phosphatase C1687.21 OS=Schizosaccharomyces pombe (strain 972 / ATCC 24843) PE=3 SV=1	Uncharacterized protein {ECO:0000313|EMBL:CDO73618.1} OS=Pycnoporus cinnabarinus (Cinnabar-red polypore) PE=4 SV=1	phosphoglycerate mutase-like protein [Dichomitus squalens LYAD-421 SS1]
EVM0001484.1	--	K07297|0|dsq:DICSQDRAFT_139891|HlyIII-domain-containing protein; K07297 adiponectin receptor (A)	[RT]	--	Haemolysin-III related	ADIPOR-like receptor SPBC12C2.09c GN=SPBC12C2.09c OS=Schizosaccharomyces pombe (strain 972 / ATCC 24843) PE=3 SV=1	HlyIII-domain-containing protein {ECO:0000313|EMBL:EJF57954.1} OS=Dichomitus squalens (strain LYAD-421) PE=4 SV=1	HlyIII-domain-containing protein [Dichomitus squalens LYAD-421 SS1]
EVM0003673.2	--	--	--	--	--	--	Uncharacterized protein {ECO:0000313|EMBL:EMD35867.1} OS=Ceriporiopsis subvermispora (strain B) PE=4 SV=1	hypothetical protein CERSUDRAFT_115786 [Ceriporiopsis subvermispora B]
EVM0005097.1	--	--	--	--	--	--	Uncharacterized protein {ECO:0000313|EMBL:EJF61123.1} OS=Dichomitus squalens (strain LYAD-421) PE=4 SV=1	hypothetical protein DICSQDRAFT_106079 [Dichomitus squalens LYAD-421 SS1]
EVM0006336.1	Biological Process: DNA metabolic process (GO:0006259);	--	[D]	Cell cycle control, cell division, chromosome partitioning	PIF1-like helicase	ATP-dependent DNA helicase PIF1 {ECO:0000255|HAMAP-Rule:MF_03176} GN=pif1 OS=Emericella nidulans (strain FGSC A4 / ATCC 38163 / CBS 112.46 / NRRL PE=3 SV=2	ATP-dependent DNA helicase PIF1 {ECO:0000313|EMBL:EAU89526.2} OS=Coprinopsis cinerea (strain Okayama-7 / 130 / ATCC MYA-4618 / FGSC PE=4 SV=2	ATP-dependent DNA helicase PIF1 [Coprinopsis cinerea okayama7#130]
EVM0013144.1	--	--	--	--	--	--	Uncharacterized protein {ECO:0000313|EMBL:KDQ25744.1} OS=Pleurotus ostreatus PC15 PE=4 SV=1	hypothetical protein M413DRAFT_448873 [Hebeloma cylindrosporum h7]
EVM0012045.1	--	--	--	--	--	--	Uncharacterized protein {ECO:0000313|EMBL:EJF60373.1} OS=Dichomitus squalens (strain LYAD-421) PE=4 SV=1	hypothetical protein DICSQDRAFT_171095 [Dichomitus squalens LYAD-421 SS1]
EVM0004726.1	--	--	--	--	--	--	--	hypothetical protein TRAVEDRAFT_21449 [Trametes versicolor FP-101664 SS1]
EVM0001819.1	--	--	[B]	Chromatin structure and dynamics	Chromo (CHRromatin Organisation MOdifier) domain	--	Uncharacterized protein {ECO:0000313|EMBL:CDO73264.1} OS=Pycnoporus cinnabarinus (Cinnabar-red polypore) PE=4 SV=1	hypothetical protein DICSQDRAFT_133894 [Dichomitus squalens LYAD-421 SS1]
EVM0001796.1	--	--	--	--	--	--	Uncharacterized protein {ECO:0000313|EMBL:CDO72290.1} OS=Pycnoporus cinnabarinus (Cinnabar-red polypore) PE=4 SV=1	hypothetical protein BN946_scf184970.g142 [Trametes cinnabarina]
EVM0004290.1	--	--	--	--	--	--	Uncharacterized protein {ECO:0000313|EMBL:EJF58122.1} OS=Dichomitus squalens (strain LYAD-421) PE=4 SV=1	hypothetical protein DICSQDRAFT_173215 [Dichomitus squalens LYAD-421 SS1]
EVM0013079.2	--	--	--	--	--	--	Uncharacterized protein {ECO:0000313|EMBL:EJF61760.1} OS=Dichomitus squalens (strain LYAD-421) PE=4 SV=1	hypothetical protein DICSQDRAFT_161382 [Dichomitus squalens LYAD-421 SS1]
EVM0009255.1	--	--	[S]	Function unknown	--	Small RNA 2&apos;-O-methyltransferase GN=SPBC336.05c OS=Schizosaccharomyces pombe (strain 972 / ATCC 24843) PE=3 SV=1	Predicted protein {ECO:0000313|EMBL:EED86029.1} OS=Postia placenta (strain ATCC 44394 / Madison 698-R) PE=4 SV=1	hypothetical protein DICSQDRAFT_144307 [Dichomitus squalens LYAD-421 SS1]
EVM0008325.1	--	--	--	--	--	--	Uncharacterized protein {ECO:0000313|EMBL:EIW51828.1} OS=Trametes versicolor (strain FP-101664) PE=4 SV=1	hypothetical protein TRAVEDRAFT_49588 [Trametes versicolor FP-101664 SS1]
EVM0011880.1	--	--	[S]	Function unknown	Fcf2 pre-rRNA processing	rRNA-processing protein fcf2 GN=fcf2 OS=Schizosaccharomyces pombe (strain 972 / ATCC 24843) PE=3 SV=1	Fcf2-domain-containing protein {ECO:0000313|EMBL:EJF57103.1} OS=Dichomitus squalens (strain LYAD-421) PE=4 SV=1	Fcf2-domain-containing protein [Dichomitus squalens LYAD-421 SS1]
EVM0007221.1	--	--	--	--	--	--	Uncharacterized protein {ECO:0000313|EMBL:EIW51305.1} OS=Trametes versicolor (strain FP-101664) PE=4 SV=1	hypothetical protein TRAVEDRAFT_48836 [Trametes versicolor FP-101664 SS1]
EVM0006375.1	--	--	--	--	--	--	Uncharacterized protein {ECO:0000313|EMBL:EJF57181.1} OS=Dichomitus squalens (strain LYAD-421) PE=4 SV=1	hypothetical protein DICSQDRAFT_163546 [Dichomitus squalens LYAD-421 SS1]
EVM0006360.1	Biological Process: amino acid transmembrane transport (GO:0003333); Molecular Function: amino acid transmembrane transporter activity (GO:0015171); Cellular Component: integral component of membrane (GO:0016021);	--	[E]	Amino acid transport and metabolism	Amino acid permease	Uncharacterized amino-acid permease C15C4.04c GN=SPBC15C4.04c OS=Schizosaccharomyces pombe (strain 972 / ATCC 24843) PE=3 SV=1	APC amino acid permease {ECO:0000313|EMBL:EJF61992.1} OS=Dichomitus squalens (strain LYAD-421) PE=4 SV=1	APC amino acid permease [Dichomitus squalens LYAD-421 SS1]
EVM0000719.1	--	--	--	--	--	--	Uncharacterized protein {ECO:0000313|EMBL:CDO76890.1} OS=Pycnoporus cinnabarinus (Cinnabar-red polypore) PE=4 SV=1	hypothetical protein BN946_scf184903.g11 [Trametes cinnabarina]
EVM0010149.1	Molecular Function: cofactor binding (GO:0048037);	--	--	--	CoA binding domain	--	Uncharacterized protein {ECO:0000313|EMBL:EMD33784.1} OS=Ceriporiopsis subvermispora (strain B) PE=4 SV=1	NAD(P)-binding protein [Dichomitus squalens LYAD-421 SS1]
EVM0004608.1	Molecular Function: triglyceride lipase activity (GO:0004806); Biological Process: lipid metabolic process (GO:0006629);	--	[I]	Lipid transport and metabolism	Lipase (class 3)	Lipase (Precursor) GN=LIP OS=Thermomyces lanuginosus (Humicola lanuginosa) PE=1 SV=1	Uncharacterized protein {ECO:0000313|EMBL:CDO68819.1} OS=Pycnoporus cinnabarinus (Cinnabar-red polypore) PE=4 SV=1	lipase [Dichomitus squalens LYAD-421 SS1]
EVM0007420.4	--	--	--	--	--	--	Uncharacterized protein {ECO:0000313|EMBL:EJF58861.1} OS=Dichomitus squalens (strain LYAD-421) PE=4 SV=1	hypothetical protein DICSQDRAFT_128591 [Dichomitus squalens LYAD-421 SS1]
EVM0003134.1	--	--	--	--	--	--	Uncharacterized protein {ECO:0000313|EMBL:EJF55665.1} OS=Dichomitus squalens (strain LYAD-421) PE=4 SV=1	hypothetical protein DICSQDRAFT_164197 [Dichomitus squalens LYAD-421 SS1]
EVM0002147.1	--	--	--	--	F-box-like	--	Uncharacterized protein {ECO:0000313|EMBL:EJF56483.1} OS=Dichomitus squalens (strain LYAD-421) PE=4 SV=1	hypothetical protein DICSQDRAFT_163884 [Dichomitus squalens LYAD-421 SS1]
EVM0003034.3	Molecular Function: acetyl-CoA carboxylase activity (GO:0003989); Molecular Function: biotin carboxylase activity (GO:0004075); Molecular Function: ATP binding (GO:0005524); Biological Process: fatty acid biosynthetic process (GO:0006633); Molecular Function: metal ion binding (GO:0046872);	K11262|0|dsq:DICSQDRAFT_80920|acetyl CoA carboxylase; K11262 acetyl-CoA carboxylase / biotin carboxylase [EC:6.4.1.2 6.3.4.14] (A)	[I]	Lipid transport and metabolism	Acetyl-CoA carboxylase, central region	Biotin carboxylase GN=cut6 OS=Schizosaccharomyces pombe (strain 972 / ATCC 24843) PE=1 SV=2	Uncharacterized protein {ECO:0000313|EMBL:CDO72088.1} OS=Pycnoporus cinnabarinus (Cinnabar-red polypore) PE=4 SV=1	acetyl CoA carboxylase [Dichomitus squalens LYAD-421 SS1]
EVM0001735.1	--	--	[G]	Carbohydrate transport and metabolism	--	CRP1 short C-terminal subpeptide GN=CRP1 OS=Saccharomyces cerevisiae (strain AWRI796) PE=3 SV=2	Carbohydrate-binding module family 48 protein {ECO:0000313|EMBL:EKM59599.1} (Fragment) OS=Phanerochaete carnosa (strain HHB-10118-sp) PE=4 SV=1	hypothetical protein TRAVEDRAFT_63412 [Trametes versicolor FP-101664 SS1]
EVM0005230.1	--	K04718|0|dsq:DICSQDRAFT_77846|hypothetical protein; K04718 sphingosine kinase [EC:2.7.1.91] (A)	[IT]	--	Diacylglycerol kinase catalytic domain	Sphingoid long chain base kinase 4 GN=lcb4 OS=Schizosaccharomyces pombe (strain 972 / ATCC 24843) PE=3 SV=1	Uncharacterized protein {ECO:0000313|EMBL:EIW51685.1} OS=Trametes versicolor (strain FP-101664) PE=4 SV=1	hypothetical protein DICSQDRAFT_77846 [Dichomitus squalens LYAD-421 SS1]
EVM0001874.1	Molecular Function: iron ion binding (GO:0005506); Cellular Component: endoplasmic reticulum (GO:0005783); Biological Process: fatty acid biosynthetic process (GO:0006633); Biological Process: sphingolipid metabolic process (GO:0006665); Molecular Function: oxidoreductase activity (GO:0016491); Molecular Function: heme binding (GO:0020037); Biological Process: oxidation-reduction process (GO:0055…	--	[I]	Lipid transport and metabolism	Cytochrome b5-like Heme/Steroid binding domain	Ceramide very long chain fatty acid hydroxylase SCS7 GN=YM8156.14C OS=Saccharomyces cerevisiae (strain ATCC 204508 / S288c) PE=1 SV=1	Uncharacterized protein {ECO:0000313|EMBL:CDO75739.1} OS=Pycnoporus cinnabarinus (Cinnabar-red polypore) PE=4 SV=1	oxidoreductase [Dichomitus squalens LYAD-421 SS1]
EVM0010734.1	--	--	--	--	--	--	Glycopeptide {ECO:0000313|EMBL:EJF59100.1} OS=Dichomitus squalens (strain LYAD-421) PE=4 SV=1	hypothetical protein DICSQDRAFT_169088 [Dichomitus squalens LYAD-421 SS1]
EVM0010252.1	--	--	[R]	General function prediction only	WD domain, G-beta repeat	Uncharacterized WD repeat-containing protein C32H8.09 OS=Schizosaccharomyces pombe (strain 972 / ATCC 24843) PE=3 SV=1	WD repeat-containing protein 8 {ECO:0000313|EMBL:EJF60800.1} OS=Dichomitus squalens (strain LYAD-421) PE=4 SV=1	WD repeat-containing protein 8 [Dichomitus squalens LYAD-421 SS1]
EVM0001620.2	--	K18167|6.17116e-54|dsq:DICSQDRAFT_55520|hypothetical protein; K18167 succinate dehydrogenase assembly factor 1 (A)	[S]	Function unknown	Complex1_LYR-like	Succinate dehydrogenase assembly factor 1, mitochondrial {ECO:0000250|UniProtKB:Q3E785} GN=SPAC664.12c OS=Schizosaccharomyces pombe (strain 972 / ATCC 24843) PE=3 SV=1	Uncharacterized protein {ECO:0000313|EMBL:EMD39940.1} OS=Ceriporiopsis subvermispora (strain B) PE=4 SV=1	hypothetical protein DICSQDRAFT_55520 [Dichomitus squalens LYAD-421 SS1]
EVM0005107.1	--	--	--	--	--	--	Uncharacterized protein {ECO:0000313|EMBL:CDO70773.1} OS=Pycnoporus cinnabarinus (Cinnabar-red polypore) PE=4 SV=1	hypothetical protein DICSQDRAFT_177188 [Dichomitus squalens LYAD-421 SS1]
EVM0011320.1	Cellular Component: nucleosome (GO:0000786); Molecular Function: DNA binding (GO:0003677); Cellular Component: nucleus (GO:0005634); Biological Process: nucleosome assembly (GO:0006334); Molecular Function: protein heterodimerization activity (GO:0046982);	K11252|6.56055e-98|dsq:DICSQDRAFT_137367|histone-fold-containing protein; K11252 histone H2B (A)	[B]	Chromatin structure and dynamics	Core histone H2A/H2B/H3/H4	Histone H2B GN=htbA OS=Agaricus bisporus (White button mushroom) PE=2 SV=3	Histone H2B {ECO:0000256|RuleBase:RU000451} OS=Dichomitus squalens (strain LYAD-421) PE=3 SV=1	histone-fold-containing protein [Dichomitus squalens LYAD-421 SS1]
EVM0011013.1	--	--	[L]	Replication, recombination and repair	Calcineurin-like phosphoesterase	Uncharacterized protein C630.12 (Precursor) GN=SPAC630.12 OS=Schizosaccharomyces pombe (strain 972 / ATCC 24843) PE=3 SV=1	Uncharacterized protein {ECO:0000313|EMBL:CDO69293.1} OS=Pycnoporus cinnabarinus (Cinnabar-red polypore) PE=4 SV=1	Metallo-dependent phosphatase [Dichomitus squalens LYAD-421 SS1]
EVM0012941.1	Biological Process: tryptophan biosynthetic process (GO:0000162); Molecular Function: tryptophan synthase activity (GO:0004834);	K01694|0|dsq:DICSQDRAFT_98330|bifunctional tryptophan synthase TRP1; K01694 tryptophan synthase [EC:4.2.1.20] (A)	[E]	Amino acid transport and metabolism	Tryptophan synthase alpha chain	Tryptophan synthase GN=TRP-1 OS=Coprinopsis cinerea (strain Okayama-7 / 130 / ATCC MYA-4618 / FGSC PE=3 SV=2	Uncharacterized protein {ECO:0000313|EMBL:CDO77645.1} OS=Pycnoporus cinnabarinus (Cinnabar-red polypore) PE=3 SV=1	bifunctional tryptophan synthase TRP1 [Dichomitus squalens LYAD-421 SS1]
EVM0004191.2	--	--	--	--	--	--	Uncharacterized protein {ECO:0000313|EMBL:CDO70761.1} OS=Pycnoporus cinnabarinus (Cinnabar-red polypore) PE=4 SV=1	hypothetical protein DICSQDRAFT_77444 [Dichomitus squalens LYAD-421 SS1]
EVM0003348.1	--	--	--	--	Beta-glucan synthesis-associated protein (SKN1)	Beta-glucan synthesis-associated protein KRE6 GN=KRE6 OS=Saccharomyces cerevisiae (strain ATCC 204508 / S288c) PE=1 SV=2	Glycoside Hydrolase Family 16 protein {ECO:0000313|EMBL:CDO70840.1} OS=Pycnoporus cinnabarinus (Cinnabar-red polypore) PE=4 SV=1	Glycoside Hydrolase Family 16 protein [Trametes cinnabarina]
EVM0010715.2	--	--	--	--	--	--	Uncharacterized protein {ECO:0000313|EMBL:KDQ60966.1} OS=Jaapia argillacea MUCL 33604 PE=4 SV=1	hypothetical protein DICSQDRAFT_179606 [Dichomitus squalens LYAD-421 SS1]
EVM0007513.1	Cellular Component: nucleus (GO:0005634); Biological Process: intracellular protein transport (GO:0006886); Molecular Function: Ran GTPase binding (GO:0008536);	--	[YU]	--	HEAT repeats	Probable importin subunit beta-4 GN=kap123 OS=Schizosaccharomyces pombe (strain 972 / ATCC 24843) PE=3 SV=1	ARM repeat-containing protein {ECO:0000313|EMBL:EJF60572.1} OS=Dichomitus squalens (strain LYAD-421) PE=4 SV=1	ARM repeat-containing protein [Dichomitus squalens LYAD-421 SS1]
EVM0004940.1	--	--	--	--	Caspase domain	--	Uncharacterized protein {ECO:0000313|EMBL:EJF62171.1} OS=Dichomitus squalens (strain LYAD-421) PE=4 SV=1	hypothetical protein DICSQDRAFT_169199 [Dichomitus squalens LYAD-421 SS1]
EVM0004567.1	--	--	--	--	--	--	Uncharacterized protein {ECO:0000313|EMBL:EJF61519.1} (Fragment) OS=Dichomitus squalens (strain LYAD-421) PE=4 SV=1	hypothetical protein DICSQDRAFT_60260, partial [Dichomitus squalens LYAD-421 SS1]
EVM0011566.1	--	--	--	--	Terpene synthase family, metal binding domain	Delta(6)-protoilludene synthase GN=PRO1 OS=Armillaria gallica (Bulbous honey fungus) PE=1 SV=1	Uncharacterized protein {ECO:0000313|EMBL:EMD33938.1} OS=Ceriporiopsis subvermispora (strain B) PE=4 SV=1	hypothetical protein CERSUDRAFT_97863 [Ceriporiopsis subvermispora B]
EVM0005427.1	--	K13577|0|dsq:DICSQDRAFT_136500|dicarboxylic acid transporter; K13577 solute carrier family 25 (mitochondrial dicarboxylate transporter), member 10 (A)	[C]	Energy production and conversion	Mitochondrial carrier protein	Mitochondrial dicarboxylate transporter GN=DIC1 OS=Candida glabrata (strain ATCC 2001 / CBS 138 / JCM 3761 / NBRC 0622 / PE=3 SV=1	Dicarboxylic acid transporter {ECO:0000313|EMBL:EJF61622.1} OS=Dichomitus squalens (strain LYAD-421) PE=3 SV=1	dicarboxylic acid transporter [Dichomitus squalens LYAD-421 SS1]
EVM0010619.1	Biological Process: regulation of transcription, DNA-templated (GO:0006355); Biological Process: transcription from RNA polymerase II promoter (GO:0006366);	--	--	--	Fungal Zn(2)-Cys(6) binuclear cluster domain	Uncharacterized transcriptional regulatory protein C27B12.11c OS=Schizosaccharomyces pombe (strain 972 / ATCC 24843) PE=1 SV=1	Uncharacterized protein {ECO:0000313|EMBL:CDS02876.1} OS=Absidia idahoensis var. thermophila PE=4 SV=1	hypothetical protein DICSQDRAFT_123664 [Dichomitus squalens LYAD-421 SS1]
EVM0004823.1	--	--	--	--	Zinc finger, C2H2 type	Transcriptional regulator CRZ1 GN=CRZ1 OS=Candida albicans (strain SC5314 / ATCC MYA-2876) PE=1 SV=1	Uncharacterized protein {ECO:0000313|EMBL:EJF56888.1} OS=Dichomitus squalens (strain LYAD-421) PE=4 SV=1	hypothetical protein DICSQDRAFT_183536 [Dichomitus squalens LYAD-421 SS1]
EVM0005982.1	--	K06889|0|dsq:DICSQDRAFT_136463|alpha/beta-hydrolase; K06889 (A)	[R]	General function prediction only	Alpha/beta hydrolase family	Protein bem46 GN=bem46 OS=Schizosaccharomyces pombe (strain 972 / ATCC 24843) PE=2 SV=3	Alpha/beta-hydrolase {ECO:0000313|EMBL:EJF61573.1} OS=Dichomitus squalens (strain LYAD-421) PE=4 SV=1	alpha/beta-hydrolase [Dichomitus squalens LYAD-421 SS1]
EVM0010594.1	--	--	--	--	--	--	Uncharacterized protein {ECO:0000313|EMBL:EPS97566.1} (Fragment) OS=Fomitopsis pinicola (strain FP-58527) PE=4 SV=1	hypothetical protein FOMPIDRAFT_1128399, partial [Fomitopsis pinicola FP-58527 SS1]
EVM0004220.1	--	--	--	--	DASH complex subunit Duo1	--	Uncharacterized protein {ECO:0000313|EMBL:CDO75358.1} OS=Pycnoporus cinnabarinus (Cinnabar-red polypore) PE=4 SV=1	hypothetical protein DICSQDRAFT_79492 [Dichomitus squalens LYAD-421 SS1]
EVM0010179.2	--	--	[K]	Transcription	Helix-loop-helix DNA-binding domain	Processed sterol regulatory element-binding protein 1 OS=Schizosaccharomyces pombe (strain 972 / ATCC 24843) PE=1 SV=1	Uncharacterized protein {ECO:0000313|EMBL:EMD34676.1} OS=Ceriporiopsis subvermispora (strain B) PE=4 SV=1	hypothetical protein DICSQDRAFT_82426 [Dichomitus squalens LYAD-421 SS1]
EVM0010064.1	Biological Process: lipid metabolic process (GO:0006629); Molecular Function: hydrolase activity (GO:0016787);	K14676|3.01346e-68|dsq:DICSQDRAFT_151551|patatin-domain-containing protein; K14676 lysophospholipid hydrolase [EC:3.1.1.5] (A)	[R]	General function prediction only	Cyclic nucleotide-binding domain	Lysophospholipase NTE1 GN=NTE1 OS=Ustilago maydis (strain 521 / FGSC 9021) PE=3 SV=1	Uncharacterized protein {ECO:0000313|EMBL:CDO73038.1} OS=Pycnoporus cinnabarinus (Cinnabar-red polypore) PE=4 SV=1	patatin-domain-containing protein [Dichomitus squalens LYAD-421 SS1]
EVM0006295.1	--	--	[G]	Carbohydrate transport and metabolism	Major Facilitator Superfamily	Uncharacterized transporter C11D3.18C GN=SPAC11D3.18c OS=Schizosaccharomyces pombe (strain 972 / ATCC 24843) PE=3 SV=1	Major facilitator superfamily {ECO:0000313|EMBL:ETW76676.1} OS=Heterobasidion irregulare TC 32-1 PE=4 SV=1	MFS general substrate transporter [Dichomitus squalens LYAD-421 SS1]
EVM0004179.1	--	--	--	--	Glycosyl hydrolase family 92	--	Glycoside hydrolase family 92 protein {ECO:0000313|EMBL:EJF59982.1} OS=Dichomitus squalens (strain LYAD-421) PE=4 SV=1	glycoside hydrolase family 92 protein [Dichomitus squalens LYAD-421 SS1]
EVM0010234.1	Molecular Function: hydrolase activity (GO:0016787);	K11841|0|dsq:DICSQDRAFT_49789|cysteine proteinase; K11841 ubiquitin carboxyl-terminal hydrolase 10 [EC:3.4.19.12] (A)	[O]	Posttranslational modification, protein turnover, chaperones	Ubiquitin carboxyl-terminal hydrolase	Probable ubiquitin carboxyl-terminal hydrolase 3 GN=ubp3 OS=Schizosaccharomyces pombe (strain 972 / ATCC 24843) PE=3 SV=1	Ubiquitin carboxyl-terminal hydrolase {ECO:0000256|RuleBase:RU004435} OS=Pycnoporus cinnabarinus (Cinnabar-red polypore) PE=3 SV=1	cysteine proteinase [Dichomitus squalens LYAD-421 SS1]
EVM0009715.1	--	--	[S]	Function unknown	Membrane magnesium transporter	--	Uncharacterized protein {ECO:0000313|EMBL:EPT00988.1} OS=Fomitopsis pinicola (strain FP-58527) PE=4 SV=1	hypothetical protein DICSQDRAFT_53485 [Dichomitus squalens LYAD-421 SS1]
EVM0006843.1	--	--	[Q]	Secondary metabolites biosynthesis, transport and catabolism	Cytochrome P450	Tryprostatin B 6-hydroxylase GN=ftmP450-1 OS=Neosartorya fischeri (strain ATCC 1020 / DSM 3700 / FGSC A1164 / NRRL PE=3 SV=1	High nitrogen upregulated cytochrome P450 monooxygenase 2 {ECO:0000313|EMBL:EJF55986.1} (Fragment) OS=Dichomitus squalens (strain LYAD-421) PE=3 SV=1	high nitrogen upregulated cytochrome P450 monooxygenase 2, partial [Dichomitus squalens LYAD-421 SS1]
EVM0000603.1	Molecular Function: organic cyclic compound binding (GO:0097159); Molecular Function: heterocyclic compound binding (GO:1901363);	K08734|0|dsq:DICSQDRAFT_54537|DNA binding protein; K08734 DNA mismatch repair protein MLH1 (A)	[L]	Replication, recombination and repair	DNA mismatch repair protein, C-terminal domain	Putative MutL protein homolog 1 GN=mlh1 OS=Schizosaccharomyces pombe (strain 972 / ATCC 24843) PE=2 SV=1	Uncharacterized protein {ECO:0000313|EMBL:EPS97454.1} OS=Fomitopsis pinicola (strain FP-58527) PE=4 SV=1	DNA binding protein [Dichomitus squalens LYAD-421 SS1]
EVM0010445.2	--	--	[Q]	Secondary metabolites biosynthesis, transport and catabolism	ABC transporter transmembrane region	ATP-binding cassette transporter abc4 OS=Schizosaccharomyces pombe (strain 972 / ATCC 24843) PE=3 SV=1	P-loop containing nucleoside triphosphate hydrolase protein {ECO:0000313|EMBL:EJF59677.1} OS=Dichomitus squalens (strain LYAD-421) PE=3 SV=1	P-loop containing nucleoside triphosphate hydrolase protein [Dichomitus squalens LYAD-421 SS1]
EVM0005220.1	--	--	--	--	--	--	Uncharacterized protein {ECO:0000313|EMBL:EJF61416.1} OS=Dichomitus squalens (strain LYAD-421) PE=4 SV=1	hypothetical protein DICSQDRAFT_60448 [Dichomitus squalens LYAD-421 SS1]
EVM0008316.1	Molecular Function: structural constituent of cell wall (GO:0005199); Cellular Component: fungal-type cell wall (GO:0009277);	--	--	--	Fungal hydrophobin	Fruiting body protein SC1 (Precursor) GN=SC1 OS=Schizophyllum commune (Split gill fungus) PE=2 SV=2	Uncharacterized protein {ECO:0000313|EMBL:CDO75028.1} OS=Pycnoporus cinnabarinus (Cinnabar-red polypore) PE=4 SV=1	fungal hydrophobin [Trametes versicolor FP-101664 SS1]
EVM0007885.1	--	--	[JIT]	--	Amidase	Acetamidase GN=amdS OS=Aspergillus oryzae (strain ATCC 42149 / RIB 40) PE=3 SV=2	Amidase signature enzyme {ECO:0000313|EMBL:EJF58979.1} OS=Dichomitus squalens (strain LYAD-421) PE=4 SV=1	amidase signature enzyme [Dichomitus squalens LYAD-421 SS1]
EVM0011226.1	--	K16912|0|dsq:DICSQDRAFT_66946|Las1-domain-containing protein; K16912 ribosomal biogenesis protein LAS1 (A)	[R]	General function prediction only	Las1-like	Protein LAS1 GN=LAS1 OS=Saccharomyces cerevisiae (strain ATCC 204508 / S288c) PE=1 SV=1	Las1-domain-containing protein {ECO:0000313|EMBL:EJF58409.1} OS=Dichomitus squalens (strain LYAD-421) PE=4 SV=1	Las1-domain-containing protein [Dichomitus squalens LYAD-421 SS1]
EVM0010565.1	--	--	--	--	--	--	--	hypothetical protein TRAVEDRAFT_108110, partial [Trametes versicolor FP-101664 SS1]
EVM0008853.1	--	--	--	--	Peptidase inhibitor I9	Serine proteinase inhibitor IA-1 OS=Pleurotus ostreatus (Oyster mushroom) PE=1 SV=1	Uncharacterized protein {ECO:0000313|EMBL:KDQ57619.1} OS=Jaapia argillacea MUCL 33604 PE=4 SV=1	protease propeptide/inhibitor [Trametes versicolor FP-101664 SS1]
EVM0000391.1	--	K03036|0|dsq:DICSQDRAFT_98396|PCI-domain-containing protein; K03036 26S proteasome regulatory subunit N6 (A)	[O]	Posttranslational modification, protein turnover, chaperones	PCI domain	Probable 26S proteasome regulatory subunit rpn6 GN=rpn6 OS=Schizosaccharomyces pombe (strain 972 / ATCC 24843) PE=3 SV=1	PCI-domain-containing protein {ECO:0000313|EMBL:EIW51776.1} OS=Trametes versicolor (strain FP-101664) PE=4 SV=1	PCI-domain-containing protein [Dichomitus squalens LYAD-421 SS1]
EVM0005623.1	Molecular Function: FMN binding (GO:0010181); Molecular Function: oxidoreductase activity (GO:0016491); Biological Process: oxidation-reduction process (GO:0055114);	--	[CR]	--	NADH:flavin oxidoreductase / NADH oxidase family	Putative NADPH dehydrogenase C23G7.10c GN=SPBC23G7.10c OS=Schizosaccharomyces pombe (strain 972 / ATCC 24843) PE=3 SV=1	FMN-linked oxidoreductase {ECO:0000313|EMBL:EJF57159.1} OS=Dichomitus squalens (strain LYAD-421) PE=4 SV=1	FMN-linked oxidoreductase [Dichomitus squalens LYAD-421 SS1]
EVM0010493.1	--	K04627|0|dsq:DICSQDRAFT_156468|STE3-domain-containing protein; K04627 pheromone a factor receptor (A)	--	--	Pheromone A receptor	Pheromone B alpha 3 receptor GN=BAR3 OS=Schizophyllum commune (strain H4-8 / FGSC 9210) PE=3 SV=2	STE3-domain-containing protein {ECO:0000313|EMBL:EJF59110.1} OS=Dichomitus squalens (strain LYAD-421) PE=4 SV=1	STE3-domain-containing protein [Dichomitus squalens LYAD-421 SS1]
EVM0007155.1	--	--	--	--	--	--	Uncharacterized protein {ECO:0000313|EMBL:CDO70591.1} OS=Pycnoporus cinnabarinus (Cinnabar-red polypore) PE=4 SV=1	hypothetical protein DICSQDRAFT_166409 [Dichomitus squalens LYAD-421 SS1]
EVM0012515.1	--	--	--	--	Alpha/beta hydrolase family	--	Uncharacterized protein {ECO:0000313|EMBL:EJF57019.1} OS=Dichomitus squalens (strain LYAD-421) PE=4 SV=1	hypothetical protein DICSQDRAFT_140743 [Dichomitus squalens LYAD-421 SS1]
EVM0003819.1	Molecular Function: protein serine/threonine kinase activity (GO:0004674); Molecular Function: ATP binding (GO:0005524); Biological Process: protein phosphorylation (GO:0006468);	K03097|0|dsq:DICSQDRAFT_47971|Pkinase-domain-containing protein; K03097 casein kinase II subunit alpha [EC:2.7.11.1] (A)	[TDK]	--	Protein kinase domain	Casein kinase II subunit alpha GN=cka1 OS=Schizosaccharomyces pombe (strain 972 / ATCC 24843) PE=2 SV=2	Uncharacterized protein {ECO:0000313|EMBL:EPS99094.1} OS=Fomitopsis pinicola (strain FP-58527) PE=4 SV=1	Pkinase-domain-containing protein [Dichomitus squalens LYAD-421 SS1]
EVM0004194.1	Molecular Function: catalytic activity (GO:0003824);	K11713|0|dsq:DICSQDRAFT_106602|terpenoid cyclases/Protein prenyltransferase; K11713 geranylgeranyl transferase type-1 subunit beta [EC:2.5.1.59] (A)	[O]	Posttranslational modification, protein turnover, chaperones	Prenyltransferase and squalene oxidase repeat	Geranylgeranyl transferase type-1 subunit beta GN=cwg2 OS=Schizosaccharomyces pombe (strain 972 / ATCC 24843) PE=3 SV=1	Terpenoid cyclases/Protein prenyltransferase {ECO:0000313|EMBL:EJF60972.1} OS=Dichomitus squalens (strain LYAD-421) PE=4 SV=1	terpenoid cyclases/Protein prenyltransferase [Dichomitus squalens LYAD-421 SS1]
EVM0004157.1	--	--	--	--	--	--	Uncharacterized protein {ECO:0000313|EMBL:CDO77197.1} OS=Pycnoporus cinnabarinus (Cinnabar-red polypore) PE=4 SV=1	hypothetical protein BN946_scf184747.g10 [Trametes cinnabarina]
EVM0013166.1	--	--	--	--	--	--	Uncharacterized protein {ECO:0000313|EMBL:EJF59441.1} OS=Dichomitus squalens (strain LYAD-421) PE=4 SV=1	hypothetical protein DICSQDRAFT_138570 [Dichomitus squalens LYAD-421 SS1]
EVM0001711.1	--	--	--	--	--	--	Uncharacterized protein {ECO:0000313|EMBL:EJF59835.1} OS=Dichomitus squalens (strain LYAD-421) PE=4 SV=1	hypothetical protein DICSQDRAFT_181628 [Dichomitus squalens LYAD-421 SS1]
EVM0004804.1	--	K11761|0|dsq:DICSQDRAFT_85768|hypothetical protein; K11761 chromatin structure-remodeling complex protein RSC7 (A)	--	--	Chromatin remodelling complex Rsc7/Swp82 subunit	Chromatin structure-remodeling complex subunit RSC7 GN=YM9582.16C OS=Saccharomyces cerevisiae (strain ATCC 204508 / S288c) PE=1 SV=1	Uncharacterized protein {ECO:0000313|EMBL:EJF61715.1} OS=Dichomitus squalens (strain LYAD-421) PE=4 SV=1	hypothetical protein DICSQDRAFT_85768 [Dichomitus squalens LYAD-421 SS1]
EVM0000362.1	Molecular Function: nucleotide binding (GO:0000166); Molecular Function: nucleoside-triphosphatase activity (GO:0017111);	--	[IR]	--	ABC transporter	Heavy metal tolerance protein (Precursor) GN=hmt1 OS=Schizosaccharomyces pombe (strain 972 / ATCC 24843) PE=2 SV=3	Uncharacterized protein {ECO:0000313|EMBL:EMD32621.1} OS=Ceriporiopsis subvermispora (strain B) PE=3 SV=1	P-loop containing nucleoside triphosphate hydrolase protein [Dichomitus squalens LYAD-421 SS1]
EVM0002041.3	--	--	--	--	--	--	Uncharacterized protein {ECO:0000313|EMBL:EJF61666.1} OS=Dichomitus squalens (strain LYAD-421) PE=4 SV=1	hypothetical protein DICSQDRAFT_136542 [Dichomitus squalens LYAD-421 SS1]
EVM0011679.1	--	--	[S]	Function unknown	Cysteine-rich secretory protein family	Probable pathogenesis-related protein CaO19.6200 (Precursor) OS=Candida albicans (strain SC5314 / ATCC MYA-2876) PE=2 SV=1	PR-1-like protein {ECO:0000313|EMBL:EJF62380.1} OS=Dichomitus squalens (strain LYAD-421) PE=4 SV=1	PR-1-like protein [Dichomitus squalens LYAD-421 SS1]
EVM0000502.1	Molecular Function: ATP binding (GO:0005524); Cellular Component: cytoplasm (GO:0005737); Biological Process: protein folding (GO:0006457); Molecular Function: unfolded protein binding (GO:0051082);	K09494|0|dsq:DICSQDRAFT_135394|hypothetical protein; K09494 T-complex protein 1 subunit beta (A)	[O]	Posttranslational modification, protein turnover, chaperones	TCP-1/cpn60 chaperonin family	Probable T-complex protein 1 subunit beta GN=cct2 OS=Schizosaccharomyces pombe (strain 972 / ATCC 24843) PE=3 SV=1	Uncharacterized protein {ECO:0000313|EMBL:EMD31775.1} OS=Ceriporiopsis subvermispora (strain B) PE=3 SV=1	hypothetical protein DICSQDRAFT_135394 [Dichomitus squalens LYAD-421 SS1]
EVM0011285.1	--	K10581|0|dsq:DICSQDRAFT_104652|hypothetical protein; K10581 ubiquitin-conjugating enzyme E2 O [EC:6.3.2.19] (A)	[O]	Posttranslational modification, protein turnover, chaperones	Ubiquitin-conjugating enzyme	Ubiquitin-conjugating enzyme E2 2 GN=rhp6 OS=Schizosaccharomyces pombe (strain 972 / ATCC 24843) PE=1 SV=3	Uncharacterized protein {ECO:0000313|EMBL:EJF62287.1} OS=Dichomitus squalens (strain LYAD-421) PE=4 SV=1	hypothetical protein DICSQDRAFT_104652 [Dichomitus squalens LYAD-421 SS1]
EVM0007292.1	Biological Process: mitotic spindle organization in nucleus (GO:0030472); Cellular Component: DASH complex (GO:0042729); Cellular Component: mitotic spindle (GO:0072686);	K11553|1.31636e-36|pco:PHACADRAFT_154039|hypothetical protein; K11553 DASH complex subunit DAD1 (A)	--	--	DASH complex subunit Dad1	DASH complex subunit DAD1 GN=DAD1 OS=Yarrowia lipolytica (strain CLIB 122 / E 150) PE=3 SV=1	Uncharacterized protein {ECO:0000313|EMBL:CDO75329.1} OS=Pycnoporus cinnabarinus (Cinnabar-red polypore) PE=4 SV=1	hypothetical protein BN946_scf184848.g6 [Trametes cinnabarina]
EVM0008786.1	--	K12870|0|dsq:DICSQDRAFT_105423|pre-mRNA-splicing factor ISY1; K12870 pre-mRNA-splicing factor ISY1 (A)	[A]	RNA processing and modification	Isy1-like splicing family	Pre-mRNA-splicing factor ISY1 GN=ISY1 OS=Cryptococcus neoformans var. neoformans serotype D (strain JEC21 / PE=3 SV=1	Pre-mRNA-splicing factor ISY1 {ECO:0000313|EMBL:EJF61751.1} OS=Dichomitus squalens (strain LYAD-421) PE=4 SV=1	pre-mRNA-splicing factor ISY1 [Dichomitus squalens LYAD-421 SS1]
EVM0000084.1	--	--	--	--	--	--	Uncharacterized protein {ECO:0000313|EMBL:EJF57205.1} OS=Dichomitus squalens (strain LYAD-421) PE=4 SV=1	hypothetical protein DICSQDRAFT_174160 [Dichomitus squalens LYAD-421 SS1]
EVM0002424.1	--	--	--	--	Thioredoxin	--	Uncharacterized protein {ECO:0000313|EMBL:EJF62331.1} OS=Dichomitus squalens (strain LYAD-421) PE=4 SV=1	hypothetical protein DICSQDRAFT_58612 [Dichomitus squalens LYAD-421 SS1]
EVM0007915.1	--	--	--	--	--	--	Uncharacterized protein {ECO:0000313|EMBL:EMD32350.1} OS=Ceriporiopsis subvermispora (strain B) PE=4 SV=1	hypothetical protein CERSUDRAFT_58618 [Ceriporiopsis subvermispora B]
EVM0010187.1	--	--	[U]	Intracellular trafficking, secretion, and vesicular transport	Vacuolar import and degradation protein	Vacuolar import and degradation protein 24 GN=YBR0834 OS=Saccharomyces cerevisiae (strain ATCC 204508 / S288c) PE=1 SV=1	Uncharacterized protein {ECO:0000313|EMBL:EMD38554.1} OS=Ceriporiopsis subvermispora (strain B) PE=4 SV=1	hypothetical protein DICSQDRAFT_77664, partial [Dichomitus squalens LYAD-421 SS1]
EVM0006858.1	Molecular Function: nucleic acid binding (GO:0003676); Molecular Function: ATP binding (GO:0005524); Molecular Function: ATP-dependent helicase activity (GO:0008026);	K12820|0|dsq:DICSQDRAFT_183024|P-loop containing nucleoside triphosphate hydrolase protein; K12820 pre-mRNA-splicing factor ATP-dependent RNA helicase DHX15/PRP43 [EC:3.6.4.13] (A)	[A]	RNA processing and modification	Helicase associated domain (HA2)	Pre-mRNA-splicing factor ATP-dependent RNA helicase PRP43 GN=PRP43 OS=Saccharomyces cerevisiae (strain ATCC 204508 / S288c) PE=1 SV=1	P-loop containing nucleoside triphosphate hydrolase protein {ECO:0000313|EMBL:EJF57706.1} OS=Dichomitus squalens (strain LYAD-421) PE=4 SV=1	P-loop containing nucleoside triphosphate hydrolase protein [Dichomitus squalens LYAD-421 SS1]
EVM0011694.1	--	K00799|6.96769e-147|dsq:DICSQDRAFT_100284|hypothetical protein; K00799 glutathione S-transferase [EC:2.5.1.18] (A)	[O]	Posttranslational modification, protein turnover, chaperones	Glutathione S-transferase, N-terminal domain	--	Uncharacterized protein {ECO:0000313|EMBL:CDO74671.1} OS=Pycnoporus cinnabarinus (Cinnabar-red polypore) PE=4 SV=1	hypothetical protein DICSQDRAFT_100284 [Dichomitus squalens LYAD-421 SS1]
EVM0010589.2	--	--	[S]	Function unknown	Uncharacterized protein family UPF0016	GDT1-like protein C17G8.08c GN=SPAC17G8.08c OS=Schizosaccharomyces pombe (strain 972 / ATCC 24843) PE=3 SV=1	Uncharacterized protein {ECO:0000313|EMBL:EJF58520.1} OS=Dichomitus squalens (strain LYAD-421) PE=4 SV=1	hypothetical protein DICSQDRAFT_182475 [Dichomitus squalens LYAD-421 SS1]
EVM0008811.1	--	--	[S]	Function unknown	Uncharacterized protein family UPF0029	Protein IMPACT homolog GN=YIH1 OS=Saccharomyces cerevisiae (strain ATCC 204508 / S288c) PE=1 SV=1	Ribosomal protein S5 domain 2-like protein {ECO:0000313|EMBL:EJF56820.1} OS=Dichomitus squalens (strain LYAD-421) PE=4 SV=1	ribosomal protein S5 domain 2-like protein [Dichomitus squalens LYAD-421 SS1]
EVM0012098.1	--	--	--	--	SAP domain	--	Uncharacterized protein {ECO:0000313|EMBL:CDO76566.1} OS=Pycnoporus cinnabarinus (Cinnabar-red polypore) PE=4 SV=1	hypothetical protein BN946_scf184831.g2 [Trametes cinnabarina]
EVM0002489.1	--	--	--	--	F-box-like	--	Uncharacterized protein {ECO:0000313|EMBL:EJF59819.1} OS=Dichomitus squalens (strain LYAD-421) PE=4 SV=1	hypothetical protein DICSQDRAFT_181775 [Dichomitus squalens LYAD-421 SS1]
EVM0010020.1	--	--	--	--	--	--	Uncharacterized protein {ECO:0000313|EMBL:CDO68320.1} OS=Pycnoporus cinnabarinus (Cinnabar-red polypore) PE=4 SV=1	hypothetical protein DICSQDRAFT_165524 [Dichomitus squalens LYAD-421 SS1]
EVM0003423.1	--	--	--	--	--	--	Uncharacterized protein {ECO:0000313|EMBL:EJF56308.1} OS=Dichomitus squalens (strain LYAD-421) PE=4 SV=1	hypothetical protein DICSQDRAFT_163936 [Dichomitus squalens LYAD-421 SS1]
EVM0001463.1	--	--	--	--	Domain of unknown function (DUF4451)	Meiotic expression up-regulated protein 26 GN=meu26 OS=Schizosaccharomyces pombe (strain 972 / ATCC 24843) PE=2 SV=1	Uncharacterized protein {ECO:0000313|EMBL:EJF56954.1} OS=Dichomitus squalens (strain LYAD-421) PE=4 SV=1	hypothetical protein DICSQDRAFT_129807 [Dichomitus squalens LYAD-421 SS1]
EVM0000478.1	--	--	--	--	--	--	Uncharacterized protein {ECO:0000313|EMBL:EJF60436.1} OS=Dichomitus squalens (strain LYAD-421) PE=4 SV=1	hypothetical protein DICSQDRAFT_137521 [Dichomitus squalens LYAD-421 SS1]
EVM0011634.2	--	--	--	--	F-box-like	--	Uncharacterized protein {ECO:0000313|EMBL:CDO69160.1} OS=Pycnoporus cinnabarinus (Cinnabar-red polypore) PE=4 SV=1	hypothetical protein DICSQDRAFT_31885, partial [Dichomitus squalens LYAD-421 SS1]
EVM0006182.1	--	--	--	--	BTB/POZ domain	--	Uncharacterized protein {ECO:0000313|EMBL:CDO73343.1} OS=Pycnoporus cinnabarinus (Cinnabar-red polypore) PE=4 SV=1	hypothetical protein DICSQDRAFT_160095 [Dichomitus squalens LYAD-421 SS1]
EVM0013286.1	--	--	--	--	--	--	Uncharacterized protein {ECO:0000313|EMBL:EJF58928.1} OS=Dichomitus squalens (strain LYAD-421) PE=4 SV=1	hypothetical protein DICSQDRAFT_66062 [Dichomitus squalens LYAD-421 SS1]
EVM0003797.1	--	K14830|0|dsq:DICSQDRAFT_125330|WD40 repeat-like protein; K14830 protein MAK11 (A)	[S]	Function unknown	WD domain, G-beta repeat	Protein MAK11 GN=MAK11 OS=Saccharomyces cerevisiae (strain ATCC 204508 / S288c) PE=1 SV=1	Uncharacterized protein {ECO:0000313|EMBL:EPT01159.1} OS=Fomitopsis pinicola (strain FP-58527) PE=4 SV=1	WD40 repeat-like protein [Trametes versicolor FP-101664 SS1]
EVM0011828.1	Molecular Function: nucleic acid binding (GO:0003676); Cellular Component: nucleus (GO:0005634);	K12581|0|dsq:DICSQDRAFT_70148|CAF1-domain-containing protein; K12581 CCR4-NOT transcription complex subunit 7/8 (A)	[A]	RNA processing and modification	CAF1 family ribonuclease	Poly(A) ribonuclease pop2 GN=caf1 OS=Schizosaccharomyces pombe (strain 972 / ATCC 24843) PE=1 SV=2	CAF1-domain-containing protein {ECO:0000313|EMBL:EJF57113.1} OS=Dichomitus squalens (strain LYAD-421) PE=4 SV=1	CAF1-domain-containing protein [Dichomitus squalens LYAD-421 SS1]
EVM0006515.1	--	--	--	--	--	--	Uncharacterized protein {ECO:0000313|EMBL:CDO71840.1} OS=Pycnoporus cinnabarinus (Cinnabar-red polypore) PE=4 SV=1	hypothetical protein DICSQDRAFT_124950 [Dichomitus squalens LYAD-421 SS1]
EVM0000652.1	--	K03671|3.9899e-87|dsq:DICSQDRAFT_46641|thioredoxin-like protein; K03671 thioredoxin 1 (A)	[O]	Posttranslational modification, protein turnover, chaperones	Thioredoxin	Thioredoxin-2 GN=TRX2 OS=Saccharomyces cerevisiae (strain ATCC 204508 / S288c) PE=1 SV=3	Uncharacterized protein {ECO:0000313|EMBL:CDO73080.1} OS=Pycnoporus cinnabarinus (Cinnabar-red polypore) PE=4 SV=1	thioredoxin-like protein [Dichomitus squalens LYAD-421 SS1]
EVM0001639.1	--	--	--	--	--	--	Uncharacterized protein {ECO:0000313|EMBL:CDO73565.1} OS=Pycnoporus cinnabarinus (Cinnabar-red polypore) PE=4 SV=1	hypothetical protein DICSQDRAFT_132260 [Dichomitus squalens LYAD-421 SS1]
EVM0006369.2	Molecular Function: binding (GO:0005488); Molecular Function: oxidoreductase activity (GO:0016491);	--	[Q]	Secondary metabolites biosynthesis, transport and catabolism	Cytochrome P450	Pisatin demethylase GN=PDAT9 OS=Fusarium solani subsp. pisi (Nectria haematococca) PE=3 SV=1	Cytochrome P450 {ECO:0000313|EMBL:EJF55944.1} OS=Dichomitus squalens (strain LYAD-421) PE=3 SV=1	cytochrome P450 [Dichomitus squalens LYAD-421 SS1]
EVM0003576.1	--	--	[UO]	--	Domain of unknown function (DUF202)	Vacuolar transporter chaperone 2 GN=VTC2 OS=Saccharomyces cerevisiae (strain ATCC 204508 / S288c) PE=1 SV=1	Predicted protein {ECO:0000313|EMBL:EED83254.1} OS=Postia placenta (strain ATCC 44394 / Madison 698-R) PE=4 SV=1	hypothetical protein DICSQDRAFT_100137 [Dichomitus squalens LYAD-421 SS1]
EVM0010680.1	--	--	--	--	--	--	Uncharacterized protein {ECO:0000313|EMBL:EJF62153.1} OS=Dichomitus squalens (strain LYAD-421) PE=4 SV=1	hypothetical protein DICSQDRAFT_180044 [Dichomitus squalens LYAD-421 SS1]
EVM0002113.1	--	--	[S]	Function unknown	Uncharacterised ACR, YagE family COG1723	Sporulation protein RMD8 GN=RMD8 OS=Saccharomyces cerevisiae (strain ATCC 204508 / S288c) PE=1 SV=1	Uncharacterized protein {ECO:0000313|EMBL:EJF56228.1} OS=Dichomitus squalens (strain LYAD-421) PE=4 SV=1	hypothetical protein DICSQDRAFT_113304 [Dichomitus squalens LYAD-421 SS1]
EVM0003221.1	--	--	[S]	Function unknown	TPR repeat	TPR repeat protein oca3 GN=oca3 OS=Schizosaccharomyces pombe (strain 972 / ATCC 24843) PE=3 SV=3	Uncharacterized protein {ECO:0000313|EMBL:CDO72111.1} OS=Pycnoporus cinnabarinus (Cinnabar-red polypore) PE=4 SV=1	hypothetical protein BN946_scf184962.g54 [Trametes cinnabarina]
EVM0006967.1	--	--	--	--	Protein of unknown function (DUF4449)	Uncharacterized protein C32A11.02c GN=SPAC32A11.02c OS=Schizosaccharomyces pombe (strain 972 / ATCC 24843) PE=4 SV=1	Uncharacterized protein {ECO:0000313|EMBL:CDO71185.1} OS=Pycnoporus cinnabarinus (Cinnabar-red polypore) PE=4 SV=1	hypothetical protein DICSQDRAFT_81848 [Dichomitus squalens LYAD-421 SS1]
EVM0001560.1	Molecular Function: structural constituent of ribosome (GO:0003735); Cellular Component: ribosome (GO:0005840); Biological Process: translational elongation (GO:0006414);	K02942|4.51784e-35|ppl:POSPLDRAFT_114189|60S acidic ribosomal protein P1; K02942 large subunit ribosomal protein LP1 (A)	[J]	Translation, ribosomal structure and biogenesis	60s Acidic ribosomal protein	60S acidic ribosomal protein P1-alpha 1 GN=rpa1 OS=Schizosaccharomyces pombe (strain 972 / ATCC 24843) PE=3 SV=1	60S acidic ribosomal protein P1 {ECO:0000313|EMBL:EED82031.1} OS=Postia placenta (strain ATCC 44394 / Madison 698-R) PE=3 SV=1	60S acidic ribosomal protein P1 [Postia placenta Mad-698-R]
EVM0010074.1	--	--	--	--	--	--	Uncharacterized protein {ECO:0000313|EMBL:EKM55642.1} OS=Phanerochaete carnosa (strain HHB-10118-sp) PE=4 SV=1	hypothetical protein DICSQDRAFT_123881 [Dichomitus squalens LYAD-421 SS1]
EVM0012807.2	Molecular Function: structural constituent of ribosome (GO:0003735); Cellular Component: ribosome (GO:0005840); Biological Process: translation (GO:0006412);	K02903|1.28226e-62|dsq:DICSQDRAFT_131729|ribosomal protein L28e; K02903 large subunit ribosomal protein L28e (A)	[J]	Translation, ribosomal structure and biogenesis	Ribosomal L28e protein family	Probable 60S ribosomal protein L28e GN=rpl28e OS=Schizosaccharomyces pombe (strain 972 / ATCC 24843) PE=1 SV=1	Uncharacterized protein {ECO:0000313|EMBL:CDO76490.1} OS=Pycnoporus cinnabarinus (Cinnabar-red polypore) PE=4 SV=1	ribosomal protein L28e [Dichomitus squalens LYAD-421 SS1]
EVM0007475.2	--	--	--	--	--	--	Uncharacterized protein {ECO:0000313|EMBL:EJF60465.1} OS=Dichomitus squalens (strain LYAD-421) PE=4 SV=1	hypothetical protein DICSQDRAFT_181372 [Dichomitus squalens LYAD-421 SS1]
EVM0004244.1	--	--	--	--	--	--	Uncharacterized protein {ECO:0000313|EMBL:CDO73920.1} OS=Pycnoporus cinnabarinus (Cinnabar-red polypore) PE=4 SV=1	hypothetical protein BN946_scf185016.g77 [Trametes cinnabarina]
EVM0005239.1	--	--	--	--	BTB/POZ domain	--	Uncharacterized protein {ECO:0000313|EMBL:KDQ62746.1} OS=Jaapia argillacea MUCL 33604 PE=4 SV=1	hypothetical protein DICSQDRAFT_134600 [Dichomitus squalens LYAD-421 SS1]
EVM0005252.1	--	--	--	--	--	--	Uncharacterized protein {ECO:0000313|EMBL:EJF55641.1} OS=Dichomitus squalens (strain LYAD-421) PE=4 SV=1	hypothetical protein DICSQDRAFT_73286 [Dichomitus squalens LYAD-421 SS1]
EVM0003204.1	--	K00108|0|dsq:DICSQDRAFT_134737|GMC oxidoreductase; K00108 choline dehydrogenase [EC:1.1.99.1] (A)	[R]	General function prediction only	GMC oxidoreductase	Alcohol oxidase GN=AOD1 OS=Candida boidinii (Yeast) PE=1 SV=1	Uncharacterized protein {ECO:0000313|EMBL:EMD33982.1} OS=Ceriporiopsis subvermispora (strain B) PE=3 SV=1	GMC oxidoreductase [Dichomitus squalens LYAD-421 SS1]
EVM0001980.1	--	--	--	--	--	--	Uncharacterized protein {ECO:0000313|EMBL:EJF59146.1} OS=Dichomitus squalens (strain LYAD-421) PE=4 SV=1	hypothetical protein DICSQDRAFT_182095 [Dichomitus squalens LYAD-421 SS1]
EVM0001660.1	--	--	[S]	Function unknown	Der1-like family	DER1-like family member protein 1 GN=DFM1 OS=Saccharomyces cerevisiae (strain ATCC 204508 / S288c) PE=1 SV=1	Uncharacterized protein {ECO:0000313|EMBL:CDO75442.1} OS=Pycnoporus cinnabarinus (Cinnabar-red polypore) PE=4 SV=1	hypothetical protein DICSQDRAFT_153693 [Dichomitus squalens LYAD-421 SS1]
EVM0007634.1	--	--	--	--	--	--	Uncharacterized protein {ECO:0000313|EMBL:EJF60212.1} OS=Dichomitus squalens (strain LYAD-421) PE=4 SV=1	hypothetical protein DICSQDRAFT_107955 [Dichomitus squalens LYAD-421 SS1]
EVM0009606.1	--	--	--	--	--	--	Uncharacterized protein {ECO:0000313|EMBL:CDO76447.1} OS=Pycnoporus cinnabarinus (Cinnabar-red polypore) PE=4 SV=1	hypothetical protein BN946_scf184781.g24 [Trametes cinnabarina]
EVM0012271.1	--	--	--	--	--	--	Uncharacterized protein {ECO:0000313|EMBL:CDO76215.1} OS=Pycnoporus cinnabarinus (Cinnabar-red polypore) PE=4 SV=1	hypothetical protein BN946_scf184894.g4 [Trametes cinnabarina]
EVM0003611.1	--	--	--	--	--	--	Uncharacterized protein {ECO:0000313|EMBL:EKM56437.1} OS=Phanerochaete carnosa (strain HHB-10118-sp) PE=4 SV=1	hypothetical protein PHACADRAFT_118113 [Phanerochaete carnosa HHB-10118-sp]
EVM0009946.1	--	--	--	--	Bucentaur or craniofacial development	SWR1-complex protein 5 GN=SWC5 OS=Debaryomyces hansenii (strain ATCC 36239 / CBS 767 / JCM 1990 / NBRC PE=3 SV=2	Uncharacterized protein {ECO:0000313|EMBL:EJF58476.1} OS=Dichomitus squalens (strain LYAD-421) PE=4 SV=1	hypothetical protein DICSQDRAFT_172989 [Dichomitus squalens LYAD-421 SS1]
EVM0005429.1	--	--	--	--	--	--	Uncharacterized protein {ECO:0000313|EMBL:CDO77465.1} OS=Pycnoporus cinnabarinus (Cinnabar-red polypore) PE=4 SV=1	hypothetical protein BN946_scf184881.g9 [Trametes cinnabarina]
EVM0003695.1	--	--	--	--	NmrA-like family	--	Uncharacterized protein {ECO:0000313|EMBL:CCL99318.1} OS=Fibroporia radiculosa (strain TFFH 294) PE=4 SV=1	NAD(P)-binding protein [Dichomitus squalens LYAD-421 SS1]
EVM0010469.1	--	--	[R]	General function prediction only	Homeobox domain	Mating-type protein A-alpha Y3 OS=Schizophyllum commune (Split gill fungus) PE=2 SV=1	Predicted protein {ECO:0000313|EMBL:EED85210.1} OS=Postia placenta (strain ATCC 44394 / Madison 698-R) PE=4 SV=1	hypothetical protein DICSQDRAFT_164697 [Dichomitus squalens LYAD-421 SS1]
EVM0009559.1	--	--	[G]	Carbohydrate transport and metabolism	Major Facilitator Superfamily	Riboflavin transporter MCH5 GN=MCH5 OS=Saccharomyces cerevisiae (strain ATCC 204508 / S288c) PE=1 SV=2	Monocarboxylate permease {ECO:0000313|EMBL:EJF60629.1} OS=Dichomitus squalens (strain LYAD-421) PE=4 SV=1	monocarboxylate permease [Dichomitus squalens LYAD-421 SS1]
EVM0003765.1	Molecular Function: ketol-acid reductoisomerase activity (GO:0004455); Biological Process: branched-chain amino acid biosynthetic process (GO:0009082); Molecular Function: isomerase activity (GO:0016853); Molecular Function: coenzyme binding (GO:0050662); Biological Process: oxidation-reduction process (GO:0055114);	K00053|0|dsq:DICSQDRAFT_133274|ketol-acid reductoisomerase; K00053 ketol-acid reductoisomerase [EC:1.1.1.86] (A)	--	--	Acetohydroxy acid isomeroreductase, catalytic domain	Probable ketol-acid reductoisomerase, mitochondrial (Precursor) GN=ilv5 OS=Schizosaccharomyces pombe (strain 972 / ATCC 24843) PE=1 SV=2	Uncharacterized protein {ECO:0000313|EMBL:CDO77008.1} OS=Pycnoporus cinnabarinus (Cinnabar-red polypore) PE=4 SV=1	ketol-acid reductoisomerase [Dichomitus squalens LYAD-421 SS1]
EVM0011570.1	--	K00222|0|dsq:DICSQDRAFT_179308|ERG4/ERG24 ergosterol biosynthesis protein; K00222 delta14-sterol reductase [EC:1.3.1.70] (A)	[IT]	--	Ergosterol biosynthesis ERG4/ERG24 family	Delta(14)-sterol reductase GN=erg24 OS=Schizosaccharomyces pombe (strain 972 / ATCC 24843) PE=2 SV=1	Uncharacterized protein {ECO:0000313|EMBL:CDO76083.1} OS=Pycnoporus cinnabarinus (Cinnabar-red polypore) PE=4 SV=1	ERG4/ERG24 ergosterol biosynthesis protein [Dichomitus squalens LYAD-421 SS1]
EVM0005694.1	--	--	--	--	--	--	Uncharacterized protein {ECO:0000313|EMBL:CCA77651.1} OS=Piriformospora indica (strain DSM 11827) PE=4 SV=1	hypothetical protein PIIN_11629 [Piriformospora indica DSM 11827]
EVM0002141.1	--	--	--	--	EthD domain	--	Uncharacterized protein {ECO:0000313|EMBL:EJF61118.1} OS=Dichomitus squalens (strain LYAD-421) PE=4 SV=1	hypothetical protein DICSQDRAFT_86477 [Dichomitus squalens LYAD-421 SS1]
EVM0001235.1	Cellular Component: mitochondrion (GO:0005739);	--	[S]	Function unknown	Complex 1 protein (LYR family)	Succinate dehydrogenase assembly factor 3, mitochondrial {ECO:0000250|UniProtKB:Q04401} (Precursor) GN=UM02176 OS=Ustilago maydis (strain 521 / FGSC 9021) PE=3 SV=2	Uncharacterized protein {ECO:0000313|EMBL:EPT05577.1} OS=Fomitopsis pinicola (strain FP-58527) PE=4 SV=1	ACN9-domain-containing protein [Dichomitus squalens LYAD-421 SS1]
EVM0003457.1	Molecular Function: phosphoric ester hydrolase activity (GO:0042578);	--	[I]	Lipid transport and metabolism	SacI homology domain	Polyphosphoinositide phosphatase GN=FIG4 OS=Saccharomyces cerevisiae (strain ATCC 204508 / S288c) PE=1 SV=1	Uncharacterized protein {ECO:0000313|EMBL:EJF60117.1} OS=Dichomitus squalens (strain LYAD-421) PE=4 SV=1	hypothetical protein DICSQDRAFT_63603 [Dichomitus squalens LYAD-421 SS1]
EVM0007443.1	Molecular Function: binding (GO:0005488); Cellular Component: intracellular (GO:0005622);	--	[K]	Transcription	Histone-like transcription factor (CBF/NF-Y) and archaeal histone	DNA polymerase epsilon subunit D GN=dpb4 OS=Schizosaccharomyces pombe (strain 972 / ATCC 24843) PE=1 SV=1	Histone-fold-containing protein {ECO:0000313|EMBL:EJF61986.1} OS=Dichomitus squalens (strain LYAD-421) PE=4 SV=1	histone-fold-containing protein [Dichomitus squalens LYAD-421 SS1]
EVM0001104.1	--	--	--	--	--	--	Uncharacterized protein {ECO:0000313|EMBL:KDR69122.1} OS=Galerina marginata CBS 339.88 PE=4 SV=1	hypothetical protein GALMADRAFT_230903 [Galerina marginata CBS 339.88]
EVM0009379.1	Molecular Function: nucleic acid binding (GO:0003676); Molecular Function: ATP binding (GO:0005524); Molecular Function: ATP-dependent helicase activity (GO:0008026);	K13181|0|dsq:DICSQDRAFT_95337|DEAD-domain-containing protein; K13181 ATP-dependent RNA helicase DDX27 [EC:3.6.4.13] (A)	[A]	RNA processing and modification	DEAD/DEAH box helicase	ATP-dependent RNA helicase DRS1 GN=DRS1 OS=Cryptococcus neoformans var. neoformans serotype D (strain JEC21 / PE=3 SV=1	Uncharacterized protein {ECO:0000313|EMBL:CDO71552.1} OS=Pycnoporus cinnabarinus (Cinnabar-red polypore) PE=3 SV=1	DEAD-domain-containing protein [Dichomitus squalens LYAD-421 SS1]
EVM0012118.1	Molecular Function: binding (GO:0005488); Molecular Function: oxidoreductase activity (GO:0016491);	--	[Q]	Secondary metabolites biosynthesis, transport and catabolism	Cytochrome P450	Phenylacetate 2-hydroxylase GN=phacA OS=Emericella nidulans (Aspergillus nidulans) PE=1 SV=1	Uncharacterized protein {ECO:0000313|EMBL:KDQ57977.1} OS=Jaapia argillacea MUCL 33604 PE=3 SV=1	cytochrome P450 [Trametes versicolor FP-101664 SS1]
EVM0003490.1	Molecular Function: N-acetyltransferase activity (GO:0008080);	--	--	--	Acetyltransferase (GNAT) domain	--	Uncharacterized protein {ECO:0000313|EMBL:CDO73101.1} OS=Pycnoporus cinnabarinus (Cinnabar-red polypore) PE=4 SV=1	hypothetical protein DICSQDRAFT_76613 [Dichomitus squalens LYAD-421 SS1]
EVM0009513.1	--	--	--	--	--	--	Uncharacterized protein {ECO:0000313|EMBL:EMD30852.1} OS=Ceriporiopsis subvermispora (strain B) PE=4 SV=1	hypothetical protein TRAVEDRAFT_50893 [Trametes versicolor FP-101664 SS1]
EVM0003649.1	--	K15462|0|dsq:DICSQDRAFT_96841|RCC1/BLIP-II; K15462 protein ATS1 (A)	[S]	Function unknown	Regulator of chromosome condensation (RCC1) repeat	RCC1 repeat-containing protein C10F6.04 GN=SPAC10F6.04 OS=Schizosaccharomyces pombe (strain 972 / ATCC 24843) PE=3 SV=1	Uncharacterized protein {ECO:0000313|EMBL:EMD32622.1} OS=Ceriporiopsis subvermispora (strain B) PE=4 SV=1	RCC1/BLIP-II [Dichomitus squalens LYAD-421 SS1]
EVM0003051.1	--	--	--	--	2OG-Fe(II) oxygenase superfamily	--	Uncharacterized protein {ECO:0000313|EMBL:EJF57889.1} OS=Dichomitus squalens (strain LYAD-421) PE=4 SV=1	hypothetical protein DICSQDRAFT_182926 [Dichomitus squalens LYAD-421 SS1]
EVM0009793.1	Cellular Component: integral component of membrane (GO:0016021); Molecular Function: substrate-specific transmembrane transporter activity (GO:0022891); Biological Process: transmembrane transport (GO:0055085);	--	[R]	General function prediction only	Sugar (and other) transporter	Lactose permease GN=LAC12 OS=Kluyveromyces lactis (strain ATCC 8585 / CBS 2359 / DSM 70799 / NBRC PE=3 SV=1	Hexose transporter {ECO:0000313|EMBL:EJF62162.1} OS=Dichomitus squalens (strain LYAD-421) PE=3 SV=1	hexose transporter [Dichomitus squalens LYAD-421 SS1]
EVM0010070.1	--	--	--	--	Heterokaryon incompatibility protein (HET)	Vegetative incompatibility protein HET-E-1 GN=HET-E1 OS=Podospora anserina (Pleurage anserina) PE=3 SV=1	HET-domain-containing protein {ECO:0000313|EMBL:EJF56036.1} (Fragment) OS=Dichomitus squalens (strain LYAD-421) PE=4 SV=1	HET-domain-containing protein, partial [Dichomitus squalens LYAD-421 SS1]
EVM0009168.1	--	--	--	--	RhoGEF domain	--	Uncharacterized protein {ECO:0000313|EMBL:CDO73090.1} OS=Pycnoporus cinnabarinus (Cinnabar-red polypore) PE=4 SV=1	hypothetical protein TRAVEDRAFT_67905 [Trametes versicolor FP-101664 SS1]
EVM0008164.1	--	--	--	--	--	--	Uncharacterized protein {ECO:0000313|EMBL:EJF56485.1} OS=Dichomitus squalens (strain LYAD-421) PE=4 SV=1	hypothetical protein DICSQDRAFT_174868 [Dichomitus squalens LYAD-421 SS1]
EVM0009142.1	--	--	[S]	Function unknown	HEAT repeats	Pof6 interactor protein 1 GN=sip1 OS=Schizosaccharomyces pombe (strain 972 / ATCC 24843) PE=1 SV=1	Clathrin-coated vesicle protein {ECO:0000313|EMBL:EJF60107.1} OS=Dichomitus squalens (strain LYAD-421) PE=4 SV=1	clathrin-coated vesicle protein [Dichomitus squalens LYAD-421 SS1]
EVM0005957.2	--	--	--	--	--	--	Uncharacterized protein {ECO:0000313|EMBL:EJF61650.1} OS=Dichomitus squalens (strain LYAD-421) PE=4 SV=1	hypothetical protein DICSQDRAFT_60172 [Dichomitus squalens LYAD-421 SS1]
EVM0009603.1	--	--	--	--	--	--	Uncharacterized protein {ECO:0000313|EMBL:EIW51828.1} OS=Trametes versicolor (strain FP-101664) PE=4 SV=1	hypothetical protein TRAVEDRAFT_49590 [Trametes versicolor FP-101664 SS1]
EVM0007395.1	--	--	--	--	--	--	Uncharacterized protein {ECO:0000313|EMBL:EPS99443.1} OS=Fomitopsis pinicola (strain FP-58527) PE=4 SV=1	hypothetical protein DICSQDRAFT_46271 [Dichomitus squalens LYAD-421 SS1]
EVM0001214.1	--	--	--	--	--	--	Uncharacterized protein {ECO:0000313|EMBL:EJF58870.1} OS=Dichomitus squalens (strain LYAD-421) PE=4 SV=1	hypothetical protein DICSQDRAFT_172529 [Dichomitus squalens LYAD-421 SS1]
EVM0003041.1	Molecular Function: mannosyltransferase activity (GO:0000030); Biological Process: protein O-linked glycosylation (GO:0006493); Cellular Component: membrane (GO:0016020);	K00728|0|dsq:DICSQDRAFT_143598|glycosyltransferase family 39 protein; K00728 dolichyl-phosphate-mannose-protein mannosyltransferase [EC:2.4.1.109] (A)	[O]	Posttranslational modification, protein turnover, chaperones	Dolichyl-phosphate-mannose-protein mannosyltransferase	Dolichyl-phosphate-mannose--protein mannosyltransferase 2 {ECO:0000305} OS=Saccharomyces cerevisiae (strain ATCC 204508 / S288c) PE=1 SV=2	Glycosyltransferase Family 39 protein {ECO:0000313|EMBL:CDO68626.1} OS=Pycnoporus cinnabarinus (Cinnabar-red polypore) PE=3 SV=1	glycosyltransferase family 39 protein [Dichomitus squalens LYAD-421 SS1]
EVM0011100.1	--	--	--	--	--	--	Uncharacterized protein {ECO:0000313|EMBL:KDQ30234.1} OS=Pleurotus ostreatus PC15 PE=4 SV=1	hypothetical protein PILCRDRAFT_4231 [Piloderma croceum F 1598]
EVM0002539.1	--	--	--	--	--	--	Uncharacterized protein {ECO:0000313|EMBL:CDO70617.1} OS=Pycnoporus cinnabarinus (Cinnabar-red polypore) PE=4 SV=1	hypothetical protein DICSQDRAFT_134342 [Dichomitus squalens LYAD-421 SS1]
EVM0012253.1	--	--	--	--	--	--	Uncharacterized protein {ECO:0000313|EMBL:EMD34897.1} OS=Ceriporiopsis subvermispora (strain B) PE=4 SV=1	hypothetical protein TRAVEDRAFT_170382 [Trametes versicolor FP-101664 SS1]
EVM0010783.1	Molecular Function: binding (GO:0005488); Molecular Function: oxidoreductase activity (GO:0016491);	--	[QI]	--	Cytochrome P450	Cytochrome P450 52A1 GN=CYP52A1 OS=Candida tropicalis (Yeast) PE=1 SV=3	Cytochrome P450 {ECO:0000313|EMBL:EJF57948.1} OS=Dichomitus squalens (strain LYAD-421) PE=4 SV=1	cytochrome P450 [Dichomitus squalens LYAD-421 SS1]
EVM0011314.1	Molecular Function: 1,4-alpha-glucan branching enzyme activity (GO:0003844); Molecular Function: hydrolase activity, hydrolyzing O-glycosyl compounds (GO:0004553); Biological Process: glycogen biosynthetic process (GO:0005978); Molecular Function: cation binding (GO:0043169);	K00700|0|dsq:DICSQDRAFT_163829|glycoside hydrolase; K00700 1,4-alpha-glucan branching enzyme [EC:2.4.1.18] (A)	[G]	Carbohydrate transport and metabolism	Alpha amylase, C-terminal all-beta domain	1,4-alpha-glucan-branching enzyme GN=gbeA OS=Aspergillus oryzae (strain ATCC 42149 / RIB 40) PE=2 SV=1	Glycoside hydrolase {ECO:0000313|EMBL:EJF56622.1} OS=Dichomitus squalens (strain LYAD-421) PE=4 SV=1	glycoside hydrolase [Dichomitus squalens LYAD-421 SS1]
EVM0011391.1	--	--	--	--	--	--	Uncharacterized protein {ECO:0000313|EMBL:EJF55422.1} OS=Dichomitus squalens (strain LYAD-421) PE=4 SV=1	hypothetical protein TRAVEDRAFT_152979 [Trametes versicolor FP-101664 SS1]
EVM0001203.1	Molecular Function: structural constituent of ribosome (GO:0003735); Cellular Component: ribosome (GO:0005840); Biological Process: translation (GO:0006412); Molecular Function: rRNA binding (GO:0019843);	--	[J]	Translation, ribosomal structure and biogenesis	Ribosomal protein L16p/L10e	54S ribosomal protein L16, mitochondrial (Precursor) GN=mrpl16 OS=Schizosaccharomyces pombe (strain 972 / ATCC 24843) PE=3 SV=1	Mitochondrial ribosomal protein L16 {ECO:0000313|EMBL:EJF58957.1} OS=Dichomitus squalens (strain LYAD-421) PE=3 SV=1	mitochondrial ribosomal protein L16 [Dichomitus squalens LYAD-421 SS1]
EVM0007099.1	--	K12471|5.96943e-22|dsq:DICSQDRAFT_77172|ENTH-domain-containing protein; K12471 epsin (A)	--	--	--	--	Uncharacterized protein {ECO:0000313|EMBL:EPS99423.1} OS=Fomitopsis pinicola (strain FP-58527) PE=4 SV=1	ENTH-domain-containing protein [Dichomitus squalens LYAD-421 SS1]
EVM0005330.1	--	--	--	--	--	--	Uncharacterized protein {ECO:0000313|EMBL:EJF58870.1} OS=Dichomitus squalens (strain LYAD-421) PE=4 SV=1	hypothetical protein DICSQDRAFT_172529 [Dichomitus squalens LYAD-421 SS1]
EVM0005589.1	--	--	--	--	--	--	Uncharacterized protein {ECO:0000313|EMBL:EJF60732.1} OS=Dichomitus squalens (strain LYAD-421) PE=4 SV=1	hypothetical protein DICSQDRAFT_161922 [Dichomitus squalens LYAD-421 SS1]
EVM0012145.2	--	--	--	--	Glycosyl hydrolases family 16	Probable glycosidase C21B10.07 GN=SPBC21B10.07 OS=Schizosaccharomyces pombe (strain 972 / ATCC 24843) PE=3 SV=1	Endo-beta-glucanase {ECO:0000313|EMBL:EJF56125.1} OS=Dichomitus squalens (strain LYAD-421) PE=4 SV=1	endo-beta-glucanase [Dichomitus squalens LYAD-421 SS1]
EVM0004543.1	Molecular Function: phosphoprotein phosphatase activity (GO:0004721); Cellular Component: nucleus (GO:0005634);	K17618|0|dsq:DICSQDRAFT_143489|HAD IIID h; K17618 ubiquitin-like domain-containing CTD phosphatase 1 [EC:3.1.3.16] (A)	[K]	Transcription	NLI interacting factor-like phosphatase	--	Uncharacterized protein {ECO:0000313|EMBL:CDO73589.1} OS=Pycnoporus cinnabarinus (Cinnabar-red polypore) PE=4 SV=1	HAD IIID h [Dichomitus squalens LYAD-421 SS1]
EVM0005781.1	--	--	[IE]	--	3-beta hydroxysteroid dehydrogenase/isomerase family	Sterol-4-alpha-carboxylate 3-dehydrogenase, decarboxylating GN=erg26 OS=Schizosaccharomyces pombe (strain 972 / ATCC 24843) PE=3 SV=1	NAD-binding protein {ECO:0000313|EMBL:EPS97405.1} OS=Fomitopsis pinicola (strain FP-58527) PE=3 SV=1	NAD(P)-binding protein [Dichomitus squalens LYAD-421 SS1]
EVM0008085.1	--	--	--	--	--	Serine protease inhibitor OS=Lentinula edodes (Shiitake mushroom) PE=1 SV=1	Uncharacterized protein {ECO:0000313|EMBL:ESK88374.1} OS=Moniliophthora roreri (strain MCA 2997) PE=4 SV=1	hypothetical protein Moror_14760 [Moniliophthora roreri MCA 2997]
EVM0005510.1	--	K12400|0|dsq:DICSQDRAFT_49121|ARM repeat-containing protein; K12400 AP-4 complex subunit epsilon-1 (A)	[U]	Intracellular trafficking, secretion, and vesicular transport	Adaptin N terminal region	AP-3 complex subunit delta GN=apl5 OS=Schizosaccharomyces pombe (strain 972 / ATCC 24843) PE=3 SV=2	Uncharacterized protein {ECO:0000313|EMBL:EPS95437.1} OS=Fomitopsis pinicola (strain FP-58527) PE=4 SV=1	ARM repeat-containing protein [Dichomitus squalens LYAD-421 SS1]
EVM0012972.1	Molecular Function: GTP binding (GO:0005525);	K06944|0|dsq:DICSQDRAFT_86941|developmentally regulated GTP binding protein 1; K06944 (A)	[T]	Signal transduction mechanisms	TGS domain	Uncharacterized GTP-binding protein C9.07c GN=SPAC9.07c OS=Schizosaccharomyces pombe (strain 972 / ATCC 24843) PE=2 SV=1	Developmentally regulated GTP binding protein 1 {ECO:0000313|EMBL:EJF61319.1} OS=Dichomitus squalens (strain LYAD-421) PE=4 SV=1	developmentally regulated GTP binding protein 1 [Dichomitus squalens LYAD-421 SS1]
EVM0004361.1	--	--	--	--	Ser-Thr-rich glycosyl-phosphatidyl-inositol-anchored membrane family	Uncharacterized protein C553.10 (Precursor) GN=SPCC553.10 OS=Schizosaccharomyces pombe (strain 972 / ATCC 24843) PE=3 SV=1	Uncharacterized protein {ECO:0000313|EMBL:CDO68142.1} OS=Pycnoporus cinnabarinus (Cinnabar-red polypore) PE=4 SV=1	hypothetical protein TRAVEDRAFT_56791 [Trametes versicolor FP-101664 SS1]
EVM0000187.1	--	--	--	--	--	--	Uncharacterized protein {ECO:0000313|EMBL:EJF62307.1} OS=Dichomitus squalens (strain LYAD-421) PE=4 SV=1	hypothetical protein DICSQDRAFT_169340 [Dichomitus squalens LYAD-421 SS1]
EVM0010092.1	Cellular Component: proteasome complex (GO:0000502); Molecular Function: enzyme regulator activity (GO:0030234); Biological Process: regulation of protein catabolic process (GO:0042176); Biological Process: regulation of catalytic activity (GO:0050790);	K03033|0|dsq:DICSQDRAFT_91479|diphenol oxidase-A2; K03033 26S proteasome regulatory subunit N3 (A)	[O]	Posttranslational modification, protein turnover, chaperones	PCI domain	Probable 26S proteasome regulatory subunit rpn3 GN=rpn3 OS=Schizosaccharomyces pombe (strain 972 / ATCC 24843) PE=3 SV=2	Diphenol oxidase-A2 {ECO:0000313|EMBL:EJF57930.1} OS=Dichomitus squalens (strain LYAD-421) PE=4 SV=1	diphenol oxidase-A2 [Dichomitus squalens LYAD-421 SS1]
EVM0012243.1	--	--	[TG]	--	Gti1/Pac2 family	Global transcription regulator sge1 {ECO:0000305} OS=Gibberella fujikuroi (strain CBS 195.34 / IMI 58289 / NRRL A-6831) PE=2 SV=1	Uncharacterized protein {ECO:0000313|EMBL:EJF58502.1} (Fragment) OS=Dichomitus squalens (strain LYAD-421) PE=4 SV=1	hypothetical protein DICSQDRAFT_90507, partial [Dichomitus squalens LYAD-421 SS1]
EVM0003518.1	--	--	--	--	--	--	Uncharacterized protein {ECO:0000313|EMBL:EMD38578.1} OS=Ceriporiopsis subvermispora (strain B) PE=4 SV=1	hypothetical protein TRAVEDRAFT_165420 [Trametes versicolor FP-101664 SS1]
EVM0008015.1	Molecular Function: selenium binding (GO:0008430); Biological Process: cell redox homeostasis (GO:0045454);	--	--	--	Rdx family	--	Uncharacterized protein {ECO:0000313|EMBL:EPT02882.1} OS=Fomitopsis pinicola (strain FP-58527) PE=4 SV=1	hypothetical protein DICSQDRAFT_179633 [Dichomitus squalens LYAD-421 SS1]
EVM0005680.2	--	--	--	--	--	--	Uncharacterized protein {ECO:0000313|EMBL:EJF58216.1} OS=Dichomitus squalens (strain LYAD-421) PE=4 SV=1	hypothetical protein DICSQDRAFT_182697 [Dichomitus squalens LYAD-421 SS1]
EVM0002174.2	--	--	--	--	--	--	Uncharacterized protein {ECO:0000313|EMBL:EJF61519.1} (Fragment) OS=Dichomitus squalens (strain LYAD-421) PE=4 SV=1	hypothetical protein DICSQDRAFT_55910 [Dichomitus squalens LYAD-421 SS1]
EVM0007579.1	Biological Process: intracellular protein transport (GO:0006886); Cellular Component: ESCRT-0 complex (GO:0033565); Biological Process: late endosome to vacuole transport (GO:0045324); Molecular Function: metal ion binding (GO:0046872);	K12182|0|dsq:DICSQDRAFT_109700|ubiquitin binding protein; K12182 hepatocyte growth factor-regulated tyrosine kinase substrate (A)	[TU]	--	VHS domain	Vacuolar protein sorting-associated protein 27 GN=vps27 OS=Aspergillus terreus (strain NIH 2624 / FGSC A1156) PE=3 SV=1	Ubiquitin binding protein {ECO:0000313|EMBL:EJF58826.1} OS=Dichomitus squalens (strain LYAD-421) PE=4 SV=1	ubiquitin binding protein [Dichomitus squalens LYAD-421 SS1]
EVM0011413.1	--	--	[S]	Function unknown	Protein of unknown function DUF89	UPF0364 protein C1393.13 GN=SPCC1393.13 OS=Schizosaccharomyces pombe (strain 972 / ATCC 24843) PE=3 SV=1	Uncharacterized protein {ECO:0000313|EMBL:EJF60112.1} OS=Dichomitus squalens (strain LYAD-421) PE=4 SV=1	hypothetical protein DICSQDRAFT_107779 [Dichomitus squalens LYAD-421 SS1]
EVM0013357.1	Molecular Function: 2 iron, 2 sulfur cluster binding (GO:0051537); Biological Process: transmembrane transport (GO:0055085);	--	--	--	OPT oligopeptide transporter protein	Putative oligopeptide transporter YGL114W GN=YGL114W OS=Saccharomyces cerevisiae (strain ATCC 204508 / S288c) PE=1 SV=1	Oligopeptide transporter {ECO:0000313|EMBL:EJF56509.1} OS=Dichomitus squalens (strain LYAD-421) PE=4 SV=1	oligopeptide transporter [Dichomitus squalens LYAD-421 SS1]
EVM0005705.1	--	--	--	--	--	--	Uncharacterized protein {ECO:0000313|EMBL:CDO76566.1} OS=Pycnoporus cinnabarinus (Cinnabar-red polypore) PE=4 SV=1	hypothetical protein BN946_scf184831.g2 [Trametes cinnabarina]
EVM0001393.1	Molecular Function: GTP binding (GO:0005525); Cellular Component: nucleolus (GO:0005730);	K14537|0|dsq:DICSQDRAFT_77049|NGP1NT-domain-containing protein; K14537 nuclear GTP-binding protein (A)	[R]	General function prediction only	NGP1NT (NUC091) domain	Nucleolar GTP-binding protein 2 GN=NOG2 OS=Cryptococcus neoformans var. grubii serotype A (strain H99 / ATCC PE=3 SV=2	Uncharacterized protein {ECO:0000313|EMBL:EPS94758.1} OS=Fomitopsis pinicola (strain FP-58527) PE=4 SV=1	NGP1NT-domain-containing protein [Dichomitus squalens LYAD-421 SS1]
EVM0006027.1	--	--	--	--	Terpene synthase family, metal binding domain	Delta(6)-protoilludene synthase GN=PRO1 OS=Armillaria gallica (Bulbous honey fungus) PE=1 SV=1	Terpenoid synthase {ECO:0000313|EMBL:EJF62143.1} OS=Dichomitus squalens (strain LYAD-421) PE=4 SV=1	terpenoid synthase [Dichomitus squalens LYAD-421 SS1]
EVM0010982.1	--	K16330|0|dsq:DICSQDRAFT_75803|indigoidine synthase A-like protein; K16330 pseudouridine-5'-phosphate glycosidase / pseudouridine kinase [EC:3.2.-.- 2.7.1.83] (A)	[R]	General function prediction only	Indigoidine synthase A like protein	Pseudouridine kinase {ECO:0000250|UniProtKB:P30235} GN=SPBC1861.05 OS=Schizosaccharomyces pombe (strain 972 / ATCC 24843) PE=3 SV=1	Uncharacterized protein {ECO:0000313|EMBL:CDO71636.1} OS=Pycnoporus cinnabarinus (Cinnabar-red polypore) PE=3 SV=1	indigoidine synthase A-like protein [Dichomitus squalens LYAD-421 SS1]
EVM0001245.2	--	--	--	--	--	--	Uncharacterized protein {ECO:0000313|EMBL:EJF56280.1} OS=Dichomitus squalens (strain LYAD-421) PE=4 SV=1	hypothetical protein DICSQDRAFT_175018 [Dichomitus squalens LYAD-421 SS1]
EVM0007133.1	--	K09419|0|dsq:DICSQDRAFT_177536|hypothetical protein; K09419 heat shock transcription factor, other eukaryote (A)	[K]	Transcription	HSF-type DNA-binding	Heat shock factor protein GN=hsf1 OS=Schizosaccharomyces pombe (strain 972 / ATCC 24843) PE=1 SV=2	Uncharacterized protein {ECO:0000313|EMBL:CDO73628.1} OS=Pycnoporus cinnabarinus (Cinnabar-red polypore) PE=3 SV=1	hypothetical protein DICSQDRAFT_177536, partial [Dichomitus squalens LYAD-421 SS1]
EVM0013210.3	Molecular Function: transferase activity, transferring phosphorus-containing groups (GO:0016772);	--	--	--	--	--	Uncharacterized protein {ECO:0000313|EMBL:CDO78197.1} OS=Pycnoporus cinnabarinus (Cinnabar-red polypore) PE=4 SV=1	hypothetical protein BN946_scf184974.g5 [Trametes cinnabarina]
EVM0003050.1	Molecular Function: fatty-acyl-CoA binding (GO:0000062);	K08762|2.36423e-62|dsq:DICSQDRAFT_152992|hypothetical protein; K08762 diazepam-binding inhibitor (GABA receptor modulator, acyl-CoA-binding protein) (A)	[I]	Lipid transport and metabolism	Acyl CoA binding protein	Putative acyl-CoA-binding protein GN=SPBC1539.06 OS=Schizosaccharomyces pombe (strain 972 / ATCC 24843) PE=3 SV=1	Acyl--binding protein {ECO:0000313|EMBL:ESK94037.1} OS=Moniliophthora roreri (strain MCA 2997) PE=4 SV=1	hypothetical protein DICSQDRAFT_152992 [Dichomitus squalens LYAD-421 SS1]
EVM0001352.1	--	K09250|1.71136e-105|mrr:Moror_17466|zinc knuckle domain protein; K09250 cellular nucleic acid-binding protein (A)	[O]	Posttranslational modification, protein turnover, chaperones	Zinc knuckle	Zinc finger protein GIS2 GN=GIS2 OS=Saccharomyces cerevisiae (strain ATCC 204508 / S288c) PE=1 SV=1	Zinc knuckle domain protein {ECO:0000313|EMBL:ESK97604.1} OS=Moniliophthora roreri (strain MCA 2997) PE=4 SV=1	zinc knuckle domain protein [Moniliophthora roreri MCA 2997]
EVM0005358.1	--	--	[T]	Signal transduction mechanisms	Carboxylesterase family	Lipase 4 (Precursor) GN=LIP4 OS=Candida rugosa (Yeast) PE=3 SV=1	Carotenoid ester lipase {ECO:0000313|EMBL:EJF60948.1} OS=Dichomitus squalens (strain LYAD-421) PE=3 SV=1	carotenoid ester lipase precursor [Dichomitus squalens LYAD-421 SS1]
EVM0011891.1	--	--	--	--	--	--	Uncharacterized protein {ECO:0000313|EMBL:KDR81145.1} OS=Galerina marginata CBS 339.88 PE=4 SV=1	hypothetical protein GALMADRAFT_1122685 [Galerina marginata CBS 339.88]
EVM0007447.1	--	--	--	--	Ser-Thr-rich glycosyl-phosphatidyl-inositol-anchored membrane family	--	Uncharacterized protein {ECO:0000313|EMBL:CDO76077.1} OS=Pycnoporus cinnabarinus (Cinnabar-red polypore) PE=4 SV=1	hypothetical protein DICSQDRAFT_38874, partial [Dichomitus squalens LYAD-421 SS1]
EVM0006944.1	--	--	--	--	Small nuclear RNA activating complex (SNAPc), subunit SNAP43	--	Uncharacterized protein {ECO:0000313|EMBL:CCM05197.1} OS=Fibroporia radiculosa (strain TFFH 294) PE=4 SV=1	hypothetical protein DICSQDRAFT_95569 [Dichomitus squalens LYAD-421 SS1]
EVM0004510.1	--	--	[S]	Function unknown	SNARE associated Golgi protein	Golgi apparatus membrane protein TVP38 GN=TVP38 OS=Podospora anserina (strain S / ATCC MYA-4624 / DSM 980 / FGSC 10383) PE=3 SV=1	Uncharacterized protein {ECO:0000313|EMBL:EJF56011.1} OS=Dichomitus squalens (strain LYAD-421) PE=4 SV=1	hypothetical protein DICSQDRAFT_164046 [Dichomitus squalens LYAD-421 SS1]
EVM0000836.1	--	--	--	--	--	--	Uncharacterized protein {ECO:0000313|EMBL:CDO72517.1} OS=Pycnoporus cinnabarinus (Cinnabar-red polypore) PE=4 SV=1	hypothetical protein DICSQDRAFT_143909 [Dichomitus squalens LYAD-421 SS1]
EVM0011149.1	--	--	--	--	--	--	Uncharacterized protein {ECO:0000313|EMBL:CDO77462.1} OS=Pycnoporus cinnabarinus (Cinnabar-red polypore) PE=4 SV=1	hypothetical protein TRAVEDRAFT_48927 [Trametes versicolor FP-101664 SS1]
EVM0013035.1	Cellular Component: extracellular region (GO:0005576); Biological Process: carbohydrate metabolic process (GO:0005975); Molecular Function: cellulase activity (GO:0008810); Molecular Function: cellulose binding (GO:0030248);	K01179|0|dsq:DICSQDRAFT_65561|endoglucanase; K01179 endoglucanase [EC:3.2.1.4] (A)	--	--	Cellulase (glycosyl hydrolase family 5)	Endoglucanase 3 (Precursor) GN=CMC3 OS=Humicola insolens (Soft-rot fungus) PE=1 SV=1	Endoglucanase {ECO:0000313|EMBL:EJF59188.1} OS=Dichomitus squalens (strain LYAD-421) PE=3 SV=1	endoglucanase [Dichomitus squalens LYAD-421 SS1]
EVM0001896.1	--	K16302|0|dsq:DICSQDRAFT_111418|hypothetical protein; K16302 metal transporter CNNM (A)	[S]	Function unknown	Domain of unknown function DUF21	Protein MAM3 GN=MAM3 OS=Saccharomyces cerevisiae (strain ATCC 204508 / S288c) PE=1 SV=1	Uncharacterized protein {ECO:0000313|EMBL:EJF57635.1} OS=Dichomitus squalens (strain LYAD-421) PE=4 SV=1	hypothetical protein DICSQDRAFT_111418 [Dichomitus squalens LYAD-421 SS1]
EVM0003703.1	--	--	--	--	--	--	Uncharacterized protein {ECO:0000313|EMBL:EJF60239.1} OS=Dichomitus squalens (strain LYAD-421) PE=4 SV=1	hypothetical protein DICSQDRAFT_107631 [Dichomitus squalens LYAD-421 SS1]
EVM0000301.1	--	--	[G]	Carbohydrate transport and metabolism	Major Facilitator Superfamily	High-affinity nicotinic acid transporter GN=TNA1 OS=Saccharomyces cerevisiae (strain ATCC 204508 / S288c) PE=1 SV=1	MFS general substrate transporter {ECO:0000313|EMBL:EJF57066.1} OS=Dichomitus squalens (strain LYAD-421) PE=4 SV=1	MFS general substrate transporter [Dichomitus squalens LYAD-421 SS1]
EVM0009224.1	--	--	[R]	General function prediction only	Alpha/beta hydrolase family	Abhydrolase domain-containing protein C22H12.03 GN=SPAC22H12.03 OS=Schizosaccharomyces pombe (strain 972 / ATCC 24843) PE=3 SV=1	Uncharacterized protein {ECO:0000313|EMBL:CDO74947.1} OS=Pycnoporus cinnabarinus (Cinnabar-red polypore) PE=4 SV=1	alpha/beta-hydrolase [Dichomitus squalens LYAD-421 SS1]
EVM0003453.1	--	--	--	--	O-methyltransferase	Sterigmatocystin 8-O-methyltransferase (Precursor) GN=omtA OS=Aspergillus parasiticus PE=1 SV=1	S-adenosyl-L-methionine-dependent methyltransferase {ECO:0000313|EMBL:EJF57429.1} OS=Dichomitus squalens (strain LYAD-421) PE=4 SV=1	S-adenosyl-L-methionine-dependent methyltransferase [Dichomitus squalens LYAD-421 SS1]
EVM0011044.1	--	--	--	--	--	--	--	hypothetical protein TRAVEDRAFT_46484 [Trametes versicolor FP-101664 SS1]
EVM0007739.1	--	--	[I]	Lipid transport and metabolism	Histidine phosphatase superfamily (branch 2)	--	Phosphoglycerate mutase-like protein {ECO:0000313|EMBL:EJF61011.1} OS=Dichomitus squalens (strain LYAD-421) PE=4 SV=1	phosphoglycerate mutase-like protein [Dichomitus squalens LYAD-421 SS1]
EVM0009259.1	--	--	[Q]	Secondary metabolites biosynthesis, transport and catabolism	short chain dehydrogenase	Uncharacterized oxidoreductase C162.03 GN=SPCC162.03 OS=Schizosaccharomyces pombe (strain 972 / ATCC 24843) PE=3 SV=1	Uncharacterized protein {ECO:0000313|EMBL:ETW75276.1} (Fragment) OS=Heterobasidion irregulare TC 32-1 PE=3 SV=1	NAD-P-binding protein [Trametes versicolor FP-101664 SS1]
EVM0009240.1	--	--	--	--	--	--	Uncharacterized protein {ECO:0000313|EMBL:EJF58330.1} OS=Dichomitus squalens (strain LYAD-421) PE=4 SV=1	hypothetical protein DICSQDRAFT_165302 [Dichomitus squalens LYAD-421 SS1]
EVM0007319.1	--	K11137|0|dsq:DICSQDRAFT_154331|hypothetical protein; K11137 telomere length regulation protein (A)	[S]	Function unknown	Telomere length regulation protein	DNA replication checkpoint protein tel2 GN=tel2 OS=Schizosaccharomyces pombe (strain 972 / ATCC 24843) PE=1 SV=1	Uncharacterized protein {ECO:0000313|EMBL:CCM02859.1} OS=Fibroporia radiculosa (strain TFFH 294) PE=4 SV=1	hypothetical protein DICSQDRAFT_154331 [Dichomitus squalens LYAD-421 SS1]
EVM0011744.7	--	--	--	--	FHA domain	--	Uncharacterized protein {ECO:0000313|EMBL:EJF59445.1} OS=Dichomitus squalens (strain LYAD-421) PE=4 SV=1	hypothetical protein DICSQDRAFT_148514 [Dichomitus squalens LYAD-421 SS1]
EVM0009689.1	--	--	[T]	Signal transduction mechanisms	Carboxylesterase family	Lipase 1 (Precursor) GN=LIP1 OS=Candida rugosa (Yeast) PE=1 SV=3	Carotenoid ester lipase {ECO:0000313|EMBL:EJF60605.1} OS=Dichomitus squalens (strain LYAD-421) PE=3 SV=1	carotenoid ester lipase precursor [Dichomitus squalens LYAD-421 SS1]
EVM0009581.1	--	--	--	--	Ankyrin repeats (3 copies)	Ankyrin repeat-containing protein C105.02c GN=SPAC105.02c OS=Schizosaccharomyces pombe (strain 972 / ATCC 24843) PE=3 SV=1	Putative uncharacterized protein {ECO:0000313|EMBL:EFI91544.1} (Fragment) OS=Schizophyllum commune (strain H4-8 / FGSC 9210) PE=4 SV=1	ankyrin [Trametes versicolor FP-101664 SS1]
EVM0004708.1	--	--	--	--	--	--	Uncharacterized protein {ECO:0000313|EMBL:CDO73268.1} OS=Pycnoporus cinnabarinus (Cinnabar-red polypore) PE=4 SV=1	hypothetical protein TRAVEDRAFT_123610 [Trametes versicolor FP-101664 SS1]
EVM0007798.1	--	--	--	--	--	--	Uncharacterized protein {ECO:0000313|EMBL:CDO75503.1} OS=Pycnoporus cinnabarinus (Cinnabar-red polypore) PE=4 SV=1	hypothetical protein DICSQDRAFT_142410 [Dichomitus squalens LYAD-421 SS1]
EVM0008379.1	--	--	--	--	--	--	Uncharacterized protein {ECO:0000313|EMBL:CDO76049.1} OS=Pycnoporus cinnabarinus (Cinnabar-red polypore) PE=4 SV=1	hypothetical protein DICSQDRAFT_152470 [Dichomitus squalens LYAD-421 SS1]
EVM0003206.1	Molecular Function: hydrolase activity, acting on carbon-nitrogen (but not peptide) bonds (GO:0016810);	--	--	--	Amidohydrolase family	--	Uncharacterized protein {ECO:0000313|EMBL:CDO68900.1} OS=Pycnoporus cinnabarinus (Cinnabar-red polypore) PE=4 SV=1	hypothetical protein DICSQDRAFT_57465 [Dichomitus squalens LYAD-421 SS1]
EVM0004186.1	Molecular Function: 3-deoxy-7-phosphoheptulonate synthase activity (GO:0003849); Biological Process: aromatic amino acid family biosynthetic process (GO:0009073); Biological Process: chorismate biosynthetic process (GO:0009423);	K01626|0|dsq:DICSQDRAFT_56084|3-deoxy-7-phosphoheptulonate synthase; K01626 3-deoxy-7-phosphoheptulonate synthase [EC:2.5.1.54] (A)	--	--	DAHP synthetase I family	Phospho-2-dehydro-3-deoxyheptonate aldolase, tyrosine-inhibited GN=aro4 OS=Schizosaccharomyces pombe (strain 972 / ATCC 24843) PE=3 SV=1	Phospho-2-dehydro-3-deoxyheptonate aldolase {ECO:0000256|PIRNR:PIRNR001361} OS=Pycnoporus cinnabarinus (Cinnabar-red polypore) PE=3 SV=1	3-deoxy-7-phosphoheptulonate synthase [Trametes versicolor FP-101664 SS1]
EVM0012509.1	Biological Process: metabolic process (GO:0008152); Molecular Function: oxidoreductase activity, acting on the CH-CH group of donors (GO:0016627);	--	[I]	Lipid transport and metabolism	Acyl-CoA dehydrogenase, C-terminal domain	--	Uncharacterized protein {ECO:0000313|EMBL:CDO71419.1} OS=Pycnoporus cinnabarinus (Cinnabar-red polypore) PE=3 SV=1	hypothetical protein DICSQDRAFT_102788 [Dichomitus squalens LYAD-421 SS1]
EVM0006822.1	Biological Process: mRNA splicing, via spliceosome (GO:0000398); Cellular Component: spliceosomal complex (GO:0005681); Molecular Function: U6 snRNA binding (GO:0017070); Molecular Function: U5 snRNA binding (GO:0030623);	K12856|0|dsq:DICSQDRAFT_183400|pre-mRNA-processing-splicing factor; K12856 pre-mRNA-processing factor 8 (A)	[A]	RNA processing and modification	PROCN (NUC071) domain	Pre-mRNA-splicing factor spp42 GN=spp42 OS=Schizosaccharomyces pombe (strain 972 / ATCC 24843) PE=1 SV=1	Pre-mRNA-processing-splicing factor {ECO:0000313|EMBL:EJF57100.1} OS=Dichomitus squalens (strain LYAD-421) PE=4 SV=1	pre-mRNA-processing-splicing factor [Dichomitus squalens LYAD-421 SS1]
EVM0002376.2	Molecular Function: nuclease activity (GO:0004518);	--	--	--	--	--	Putative endonuclease exonuclease phosphatase family protein {ECO:0000313|EMBL:EOD47151.1} OS=Botryosphaeria parva (strain UCR-NP2) PE=4 SV=1	putative endonuclease exonuclease phosphatase family protein [Neofusicoccum parvum UCRNP2]
EVM0010465.3	--	--	--	--	--	--	Uncharacterized protein {ECO:0000313|EMBL:EJF59006.1} OS=Dichomitus squalens (strain LYAD-421) PE=4 SV=1	hypothetical protein DICSQDRAFT_65891 [Dichomitus squalens LYAD-421 SS1]
EVM0009489.1	--	--	--	--	--	--	Uncharacterized protein {ECO:0000313|EMBL:CDO69782.1} OS=Pycnoporus cinnabarinus (Cinnabar-red polypore) PE=4 SV=1	hypothetical protein BN946_scf184766.g27 [Trametes cinnabarina]
EVM0002160.1	--	--	--	--	F-box-like	--	Uncharacterized protein {ECO:0000313|EMBL:CDO69830.1} OS=Pycnoporus cinnabarinus (Cinnabar-red polypore) PE=4 SV=1	hypothetical protein TRAVEDRAFT_42698 [Trametes versicolor FP-101664 SS1]
EVM0000933.1	--	--	--	--	EthD domain	--	Uncharacterized protein {ECO:0000313|EMBL:EJF61118.1} OS=Dichomitus squalens (strain LYAD-421) PE=4 SV=1	hypothetical protein DICSQDRAFT_86477 [Dichomitus squalens LYAD-421 SS1]
EVM0003630.1	Biological Process: single-organism transport (GO:0044765);	--	[P]	Inorganic ion transport and metabolism	Sodium/hydrogen exchanger family	Na(+)/H(+) antiporter GN=NHA1 OS=Saccharomyces cerevisiae (strain ATCC 204508 / S288c) PE=1 SV=1	Uncharacterized protein {ECO:0000313|EMBL:CDO74442.1} OS=Pycnoporus cinnabarinus (Cinnabar-red polypore) PE=4 SV=1	hypothetical protein DICSQDRAFT_145567 [Dichomitus squalens LYAD-421 SS1]
EVM0006199.1	--	--	--	--	--	--	Delta-endotoxin CytB {ECO:0000313|EMBL:EPQ55393.1} OS=Gloeophyllum trabeum (strain ATCC 11539 / FP-39264 / Madison 617) PE=4 SV=1	Delta-endotoxin CytB, partial [Metarhizium majus ARSEF 297]
EVM0004254.1	--	--	--	--	--	--	Uncharacterized protein {ECO:0000313|EMBL:CDO77463.1} OS=Pycnoporus cinnabarinus (Cinnabar-red polypore) PE=4 SV=1	hypothetical protein BN946_scf184881.g6 [Trametes cinnabarina]
EVM0005453.1	--	--	--	--	--	--	Uncharacterized protein {ECO:0000313|EMBL:EJF57875.1} OS=Dichomitus squalens (strain LYAD-421) PE=4 SV=1	hypothetical protein DICSQDRAFT_149477 [Dichomitus squalens LYAD-421 SS1]
EVM0010824.1	--	--	--	--	--	--	Uncharacterized protein {ECO:0000313|EMBL:CDO73680.1} OS=Pycnoporus cinnabarinus (Cinnabar-red polypore) PE=4 SV=1	hypothetical protein DICSQDRAFT_145287 [Dichomitus squalens LYAD-421 SS1]
EVM0001547.1	Molecular Function: binding (GO:0005488); Molecular Function: oxidoreductase activity (GO:0016491);	--	[Q]	Secondary metabolites biosynthesis, transport and catabolism	Cytochrome P450	Cytochrome P450 52A11 GN=CYP52A11 OS=Candida maltosa (Yeast) PE=2 SV=1	Cytochrome P450 {ECO:0000313|EMBL:EJF55944.1} OS=Dichomitus squalens (strain LYAD-421) PE=3 SV=1	cytochrome P450 [Dichomitus squalens LYAD-421 SS1]
EVM0009825.1	--	K07119|5.23448e-136|dsq:DICSQDRAFT_53157|NAD(P)-binding protein; K07119 (A)	[R]	General function prediction only	Zinc-binding dehydrogenase	Zinc-type alcohol dehydrogenase-like protein PB24D3.08c GN=SPAPB24D3.08c OS=Schizosaccharomyces pombe (strain 972 / ATCC 24843) PE=3 SV=1	Uncharacterized protein {ECO:0000313|EMBL:CDO77399.1} OS=Pycnoporus cinnabarinus (Cinnabar-red polypore) PE=4 SV=1	hypothetical protein BN946_scf184857.g5 [Trametes cinnabarina]
EVM0002751.1	--	--	--	--	F-box-like	--	Uncharacterized protein {ECO:0000313|EMBL:EJF58042.1} OS=Dichomitus squalens (strain LYAD-421) PE=4 SV=1	hypothetical protein DICSQDRAFT_163150 [Dichomitus squalens LYAD-421 SS1]
EVM0010687.1	--	K15601|0|dsq:DICSQDRAFT_103145|Clavaminate synthase-like protein; K15601 lysine-specific demethylase 3 [EC:1.14.11.-] (A)	[K]	Transcription	JmjC domain, hydroxylase	--	Uncharacterized protein {ECO:0000313|EMBL:CDO74624.1} OS=Pycnoporus cinnabarinus (Cinnabar-red polypore) PE=4 SV=1	Clavaminate synthase-like protein [Dichomitus squalens LYAD-421 SS1]
EVM0006427.1	--	--	--	--	--	--	Uncharacterized protein {ECO:0000313|EMBL:EJF55895.1} OS=Dichomitus squalens (strain LYAD-421) PE=4 SV=1	hypothetical protein DICSQDRAFT_130399 [Dichomitus squalens LYAD-421 SS1]
EVM0005852.1	--	--	--	--	Alpha/beta hydrolase family	--	Alpha/beta-hydrolase {ECO:0000313|EMBL:EJF57802.1} OS=Dichomitus squalens (strain LYAD-421) PE=4 SV=1	alpha/beta-hydrolase [Dichomitus squalens LYAD-421 SS1]
EVM0003926.1	Molecular Function: aspartic-type endopeptidase activity (GO:0004190); Biological Process: proteolysis (GO:0006508);	--	[O]	Posttranslational modification, protein turnover, chaperones	Eukaryotic aspartyl protease	Aspartic protease {ECO:0000303|PubMed:10091328, ECO:0000312|EMBL:AAC17105.1} (Precursor) OS=Phaffia rhodozyma (Yeast) PE=1 SV=1	Uncharacterized protein {ECO:0000313|EMBL:CDO70781.1} OS=Pycnoporus cinnabarinus (Cinnabar-red polypore) PE=3 SV=1	acid protease, partial [Dichomitus squalens LYAD-421 SS1]
EVM0012603.2	--	--	[A]	RNA processing and modification	Putative methyltransferase	Protein-lysine N-methyltransferase EFM2 {ECO:0000305|PubMed:22522802} GN=YBR1739 OS=Saccharomyces cerevisiae (strain ATCC 204508 / S288c) PE=1 SV=1	Uncharacterized protein {ECO:0000313|EMBL:EJF59088.1} OS=Dichomitus squalens (strain LYAD-421) PE=4 SV=1	hypothetical protein DICSQDRAFT_162633 [Dichomitus squalens LYAD-421 SS1]
EVM0011348.1	--	--	--	--	Trichodiene synthase (TRI5)	Trichodiene synthase GN=TRI5 OS=Trichoderma harzianum (Hypocrea lixii) PE=3 SV=1	Terpenoid synthase {ECO:0000313|EMBL:EJF61095.1} OS=Dichomitus squalens (strain LYAD-421) PE=4 SV=1	terpenoid synthase [Dichomitus squalens LYAD-421 SS1]
EVM0006322.1	Molecular Function: sedoheptulose-7-phosphate:D-glyceraldehyde-3-phosphate glyceronetransferase activity (GO:0004801); Cellular Component: cytoplasm (GO:0005737); Biological Process: pentose-phosphate shunt (GO:0006098);	K00616|0|gtr:GLOTRDRAFT_81419|transaldolase; K00616 transaldolase [EC:2.2.1.2] (A)	[G]	Carbohydrate transport and metabolism	Transaldolase	Transaldolase GN=tal1 OS=Schizosaccharomyces pombe (strain 972 / ATCC 24843) PE=1 SV=2	Transaldolase {ECO:0000256|RuleBase:RU000501} OS=Pycnoporus cinnabarinus (Cinnabar-red polypore) PE=3 SV=1	transaldolase [Trametes versicolor FP-101664 SS1]
EVM0003513.1	--	--	--	--	--	--	Uncharacterized protein {ECO:0000313|EMBL:EJF57449.1} OS=Dichomitus squalens (strain LYAD-421) PE=4 SV=1	hypothetical protein DICSQDRAFT_173907 [Dichomitus squalens LYAD-421 SS1]
EVM0012017.1	--	--	--	--	DNA repair protein endonuclease SAE2/CtIP C-terminus	--	Uncharacterized protein {ECO:0000313|EMBL:EJF61794.1} OS=Dichomitus squalens (strain LYAD-421) PE=4 SV=1	hypothetical protein DICSQDRAFT_154988 [Dichomitus squalens LYAD-421 SS1]
EVM0009136.1	--	--	--	--	--	--	Uncharacterized protein {ECO:0000313|EMBL:EJF59413.1} OS=Dichomitus squalens (strain LYAD-421) PE=4 SV=1	hypothetical protein DICSQDRAFT_148499 [Dichomitus squalens LYAD-421 SS1]
EVM0005121.1	--	--	--	--	--	--	Uncharacterized protein {ECO:0000313|EMBL:EPT00423.1} OS=Fomitopsis pinicola (strain FP-58527) PE=4 SV=1	hypothetical protein TRAVEDRAFT_99981, partial [Trametes versicolor FP-101664 SS1]
EVM0003231.1	--	--	--	--	--	--	Uncharacterized protein {ECO:0000313|EMBL:KDR81283.1} OS=Galerina marginata CBS 339.88 PE=4 SV=1	hypothetical protein TRAVEDRAFT_23774 [Trametes versicolor FP-101664 SS1]
EVM0009728.1	--	--	--	--	--	--	Uncharacterized protein {ECO:0000313|EMBL:EJF58546.1} OS=Dichomitus squalens (strain LYAD-421) PE=4 SV=1	hypothetical protein DICSQDRAFT_162874 [Dichomitus squalens LYAD-421 SS1]
EVM0004747.1	Molecular Function: kinase activity (GO:0016301);	--	[T]	Signal transduction mechanisms	Protein kinase domain	Negative regulator of sexual conjugation and meiosis GN=ran1 OS=Schizosaccharomyces pombe (strain 972 / ATCC 24843) PE=1 SV=2	Kinase-like protein {ECO:0000313|EMBL:EJF62188.1} OS=Dichomitus squalens (strain LYAD-421) PE=3 SV=1	kinase-like protein [Dichomitus squalens LYAD-421 SS1]
EVM0003710.1	--	--	[R]	General function prediction only	Major Facilitator Superfamily	Uncharacterized MFS-type transporter C1683.03c GN=SPBC1683.03c OS=Schizosaccharomyces pombe (strain 972 / ATCC 24843) PE=3 SV=1	Efflux transporter {ECO:0000313|EMBL:EJF55999.1} OS=Dichomitus squalens (strain LYAD-421) PE=4 SV=1	efflux transporter [Dichomitus squalens LYAD-421 SS1]
EVM0006966.1	Biological Process: transmembrane transport (GO:0055085);	--	[T]	Signal transduction mechanisms	OPT oligopeptide transporter protein	Glutathione transporter 1 GN=pgt1 OS=Schizosaccharomyces pombe (strain 972 / ATCC 24843) PE=1 SV=1	Oligopeptide transporter 6 {ECO:0000313|EMBL:AGA20377.1} OS=Phanerochaete chrysosporium (White-rot fungus) PE=2 SV=1	oligopeptide transporter [Dichomitus squalens LYAD-421 SS1]
EVM0002352.1	Biological Process: cellular amino acid metabolic process (GO:0006520); Molecular Function: lyase activity (GO:0016829); Molecular Function: pyridoxal phosphate binding (GO:0030170);	K01620|0|dsq:DICSQDRAFT_130763|hypothetical protein; K01620 threonine aldolase [EC:4.1.2.5] (A)	[E]	Amino acid transport and metabolism	Beta-eliminating lyase	Probable low-specificity L-threonine aldolase GN=gly1 OS=Schizosaccharomyces pombe (strain 972 / ATCC 24843) PE=3 SV=1	Uncharacterized protein {ECO:0000313|EMBL:EMD41712.1} OS=Ceriporiopsis subvermispora (strain B) PE=4 SV=1	hypothetical protein DICSQDRAFT_130763 [Dichomitus squalens LYAD-421 SS1]
EVM0009775.1	Molecular Function: transporter activity (GO:0005215); Cellular Component: integral component of membrane (GO:0016021); Biological Process: transmembrane transport (GO:0055085);	--	[R]	General function prediction only	Major Facilitator Superfamily	Uncharacterized MFS-type transporter C409.08 GN=SPBC409.08 OS=Schizosaccharomyces pombe (strain 972 / ATCC 24843) PE=3 SV=1	Uncharacterized protein {ECO:0000313|EMBL:CDO75197.1} OS=Pycnoporus cinnabarinus (Cinnabar-red polypore) PE=4 SV=1	hypothetical protein BN946_scf184794.g4 [Trametes cinnabarina]
EVM0005392.1	--	--	--	--	--	--	Uncharacterized protein {ECO:0000313|EMBL:EJF57136.1} OS=Dichomitus squalens (strain LYAD-421) PE=4 SV=1	hypothetical protein DICSQDRAFT_174197 [Dichomitus squalens LYAD-421 SS1]
EVM0004540.1	Molecular Function: nucleoside diphosphate kinase activity (GO:0004550); Molecular Function: ATP binding (GO:0005524); Biological Process: nucleoside diphosphate phosphorylation (GO:0006165); Biological Process: GTP biosynthetic process (GO:0006183); Biological Process: UTP biosynthetic process (GO:0006228); Biological Process: CTP biosynthetic process (GO:0006241);	K00940|9.02027e-103|dsq:DICSQDRAFT_131849|nucleoside diphosphate kinase; K00940 nucleoside-diphosphate kinase [EC:2.7.4.6] (A)	[F]	Nucleotide transport and metabolism	Nucleoside diphosphate kinase	Nucleoside diphosphate kinase GN=ndk-1 OS=Neurospora crassa (strain ATCC 24698 / 74-OR23-1A / CBS 708.71 / DSM PE=2 SV=2	Nucleoside diphosphate kinase {ECO:0000256|RuleBase:RU004013} OS=Ceriporiopsis subvermispora (strain B) PE=3 SV=1	nucleoside diphosphate kinase [Dichomitus squalens LYAD-421 SS1]
EVM0006736.1	--	--	--	--	--	--	Uncharacterized protein {ECO:0000313|EMBL:EJF61894.1} OS=Dichomitus squalens (strain LYAD-421) PE=4 SV=1	hypothetical protein DICSQDRAFT_169475 [Dichomitus squalens LYAD-421 SS1]
EVM0002698.1	--	--	[R]	General function prediction only	--	Transposon Tf2-8 polyprotein GN=Tf2-8 OS=Schizosaccharomyces pombe (strain 972 / ATCC 24843) PE=3 SV=1	Uncharacterized protein {ECO:0000313|EnsemblFungi:PTTG_10843P0} (Fragment) OS=Puccinia triticina (isolate 1-1 / race 1 (BBBD) PE=4 SV=2	hypothetical protein MPER_12484 [Moniliophthora perniciosa FA553]
EVM0011908.1	--	--	[F]	Nucleotide transport and metabolism	Inosine-uridine preferring nucleoside hydrolase	Uncharacterized protein C1683.06c GN=SPBC1683.06c OS=Schizosaccharomyces pombe (strain 972 / ATCC 24843) PE=3 SV=1	Uncharacterized protein {ECO:0000313|EMBL:CDO70597.1} OS=Pycnoporus cinnabarinus (Cinnabar-red polypore) PE=4 SV=1	nucleoside hydrolase [Dichomitus squalens LYAD-421 SS1]
EVM0001995.1	Biological Process: transcription, DNA-templated (GO:0006351);	--	--	--	Fungal specific transcription factor domain	Protein priB GN=priB OS=Lentinula edodes (Shiitake mushroom) PE=2 SV=1	Uncharacterized protein {ECO:0000313|EMBL:CDO74907.1} OS=Pycnoporus cinnabarinus (Cinnabar-red polypore) PE=4 SV=1	hypothetical protein DICSQDRAFT_166722 [Dichomitus squalens LYAD-421 SS1]
EVM0006363.3	--	--	--	--	Frag1/DRAM/Sfk1 family	Protein sfk1 GN=sfk1 OS=Schizosaccharomyces pombe (strain 972 / ATCC 24843) PE=3 SV=1	Uncharacterized protein {ECO:0000313|EMBL:CCM04243.1} OS=Fibroporia radiculosa (strain TFFH 294) PE=4 SV=1	hypothetical protein DICSQDRAFT_144301 [Dichomitus squalens LYAD-421 SS1]
EVM0003948.1	Molecular Function: glycerol-3-phosphate dehydrogenase [NAD+] activity (GO:0004367); Biological Process: carbohydrate metabolic process (GO:0005975); Cellular Component: glycerol-3-phosphate dehydrogenase complex (GO:0009331); Biological Process: glycerol-3-phosphate catabolic process (GO:0046168); Molecular Function: NAD binding (GO:0051287); Biological Process: oxidation-reduction process (GO:0…	--	[C]	Energy production and conversion	NAD-dependent glycerol-3-phosphate dehydrogenase C-terminus	Glycerol-3-phosphate dehydrogenase [NAD(+)] 2 GN=gpd2 OS=Cyberlindnera jadinii (Torula yeast) PE=3 SV=2	Glycerol-3-phosphate dehydrogenase [NAD(+)] {ECO:0000256|RuleBase:RU361243} OS=Pycnoporus cinnabarinus (Cinnabar-red polypore) PE=3 SV=1	NAD-dependent glycerol-3-phosphate dehydrogenase [Dichomitus squalens LYAD-421 SS1]
EVM0001141.1	--	K10632|0|dsq:DICSQDRAFT_100857|zf-UBP-domain-containing protein; K10632 BRCA1-associated protein [EC:6.3.2.19] (A)	[R]	General function prediction only	BRCA1-associated protein 2	RING finger protein ETP1 homolog GN=SPAC16E8.13 OS=Schizosaccharomyces pombe (strain 972 / ATCC 24843) PE=3 SV=1	Uncharacterized protein {ECO:0000313|EMBL:CDO75820.1} OS=Pycnoporus cinnabarinus (Cinnabar-red polypore) PE=4 SV=1	zf-UBP-domain-containing protein [Dichomitus squalens LYAD-421 SS1]
EVM0005631.1	Cellular Component: integral component of membrane (GO:0016021); Biological Process: vesicle-mediated transport (GO:0016192);	K08515|3.57247e-147|dsq:DICSQDRAFT_101584|vesicle-associated membrane protein; K08515 vesicle-associated membrane protein 7 (A)	[U]	Intracellular trafficking, secretion, and vesicular transport	Synaptobrevin	Protein transport protein sec22 GN=sec22 OS=Schizosaccharomyces pombe (strain 972 / ATCC 24843) PE=3 SV=2	Uncharacterized protein {ECO:0000313|EMBL:EMD36448.1} OS=Ceriporiopsis subvermispora (strain B) PE=4 SV=1	vesicle-associated membrane protein [Dichomitus squalens LYAD-421 SS1]
EVM0010753.2	Biological Process: transport (GO:0006810); Cellular Component: integral component of membrane (GO:0016021);	K15100|0|dsq:DICSQDRAFT_72572|mitochondrial tricarboxylate transporter; K15100 solute carrier family 25 (mitochondrial citrate transporter), member 1 (A)	[C]	Energy production and conversion	Mitochondrial carrier protein	Uncharacterized mitochondrial carrier C19G12.05 GN=SPAC19G12.05 OS=Schizosaccharomyces pombe (strain 972 / ATCC 24843) PE=3 SV=1	Mitochondrial tricarboxylate transporter {ECO:0000313|EMBL:EJF55924.1} OS=Dichomitus squalens (strain LYAD-421) PE=3 SV=1	mitochondrial tricarboxylate transporter [Dichomitus squalens LYAD-421 SS1]
EVM0010873.1	--	K15272|0|dsq:DICSQDRAFT_97381|nucleotide-sugar transporter; K15272 solute carrier family 35 (UDP-sugar transporter), member A1/2/3 (A)	[G]	Carbohydrate transport and metabolism	Nucleotide-sugar transporter	UDP-galactose transporter GN=gms1 OS=Schizosaccharomyces pombe (strain 972 / ATCC 24843) PE=2 SV=3	Uncharacterized protein {ECO:0000313|EMBL:CDO68299.1} OS=Pycnoporus cinnabarinus (Cinnabar-red polypore) PE=4 SV=1	hypothetical protein BN946_scf184799.g26 [Trametes cinnabarina]
EVM0004021.1	--	--	--	--	F-box-like	--	Uncharacterized protein {ECO:0000313|EMBL:EJF56483.1} OS=Dichomitus squalens (strain LYAD-421) PE=4 SV=1	hypothetical protein TRAVEDRAFT_74956 [Trametes versicolor FP-101664 SS1]
EVM0008486.1	--	--	--	--	--	--	Uncharacterized protein {ECO:0000313|EMBL:CDO69305.1} OS=Pycnoporus cinnabarinus (Cinnabar-red polypore) PE=4 SV=1	hypothetical protein BN946_scf184976.g24 [Trametes cinnabarina]
EVM0002919.1	--	K00108|0|dsq:DICSQDRAFT_171858|FAD/NAD(P)-binding domain-containing protein (A)	--	--	LysM domain	Uncharacterized protein AN12072 GN=AN12072 OS=Emericella nidulans (strain FGSC A4 / ATCC 38163 / CBS 112.46 / NRRL PE=4 SV=1	FAD/NAD(P)-binding domain-containing protein {ECO:0000313|EMBL:EJF59683.1} OS=Dichomitus squalens (strain LYAD-421) PE=3 SV=1	FAD/NAD(P)-binding domain-containing protein [Dichomitus squalens LYAD-421 SS1]
EVM0006508.1	--	--	[R]	General function prediction only	FHA domain	--	Uncharacterized protein {ECO:0000313|EMBL:CDO77383.1} OS=Pycnoporus cinnabarinus (Cinnabar-red polypore) PE=4 SV=1	hypothetical protein DICSQDRAFT_99923 [Dichomitus squalens LYAD-421 SS1]
EVM0005129.1	--	--	[R]	General function prediction only	PPR repeat family	Mitochondrial group I intron splicing factor CCM1 (Precursor) GN=CCM1 OS=Yarrowia lipolytica (strain CLIB 122 / E 150) PE=3 SV=1	Uncharacterized protein {ECO:0000313|EMBL:CDO75675.1} OS=Pycnoporus cinnabarinus (Cinnabar-red polypore) PE=4 SV=1	hypothetical protein DICSQDRAFT_166520 [Dichomitus squalens LYAD-421 SS1]
EVM0010421.2	--	--	[CR]	--	FAD binding domain	--	Monooxygenase {ECO:0000313|EMBL:EJF58085.1} OS=Dichomitus squalens (strain LYAD-421) PE=4 SV=1	monooxygenase [Dichomitus squalens LYAD-421 SS1]
EVM0002343.1	--	--	--	--	F-box-like	--	Uncharacterized protein {ECO:0000313|EMBL:CCM05194.1} OS=Fibroporia radiculosa (strain TFFH 294) PE=4 SV=1	hypothetical protein DICSQDRAFT_154348 [Dichomitus squalens LYAD-421 SS1]
EVM0010867.1	Cellular Component: mitochondrion (GO:0005739); Cellular Component: membrane (GO:0016020);	K17785|0|dsq:DICSQDRAFT_100211|hypothetical protein; K17785 mitofilin (A)	[M]	Cell wall/membrane/envelope biogenesis	Mitochondrial inner membrane protein	MICOS complex subunit MIC60 (Precursor) GN=MIC60 OS=Pyrenophora tritici-repentis (strain Pt-1C-BFP) PE=3 SV=1	Uncharacterized protein {ECO:0000313|EMBL:CDO75188.1} OS=Pycnoporus cinnabarinus (Cinnabar-red polypore) PE=4 SV=1	hypothetical protein DICSQDRAFT_100211 [Dichomitus squalens LYAD-421 SS1]
EVM0001703.1	--	--	--	--	--	--	Uncharacterized protein {ECO:0000313|EMBL:EIN04005.1} OS=Punctularia strigosozonata (strain HHB-11173) PE=4 SV=1	hypothetical protein PUNSTDRAFT_139046 [Punctularia strigosozonata HHB-11173 SS5]
EVM0006916.1	--	--	--	--	--	--	Uncharacterized protein {ECO:0000313|EMBL:EJF57969.1} (Fragment) OS=Dichomitus squalens (strain LYAD-421) PE=4 SV=1	hypothetical protein DICSQDRAFT_111017, partial [Dichomitus squalens LYAD-421 SS1]
EVM0004584.2	--	--	[CR]	--	Zinc-binding dehydrogenase	Zinc-type alcohol dehydrogenase-like protein C2E1P3.01 GN=SPAC2E1P3.01 OS=Schizosaccharomyces pombe (strain 972 / ATCC 24843) PE=3 SV=1	GroES-like protein {ECO:0000313|EMBL:EJF58613.1} OS=Dichomitus squalens (strain LYAD-421) PE=4 SV=1	GroES-like protein [Dichomitus squalens LYAD-421 SS1]
EVM0002241.1	--	K12188|2.14683e-167|dsq:DICSQDRAFT_129884|hypothetical protein; K12188 ESCRT-II complex subunit VPS22 (A)	[K]	Transcription	EAP30/Vps36 family	Vacuolar-sorting protein dot2 GN=dot2 OS=Schizosaccharomyces pombe (strain 972 / ATCC 24843) PE=3 SV=1	Uncharacterized protein {ECO:0000313|EMBL:EJF56793.1} OS=Dichomitus squalens (strain LYAD-421) PE=4 SV=1	hypothetical protein DICSQDRAFT_129884 [Dichomitus squalens LYAD-421 SS1]
EVM0006565.1	--	--	--	--	--	--	Uncharacterized protein {ECO:0000313|EMBL:EJF58217.1} OS=Dichomitus squalens (strain LYAD-421) PE=4 SV=1	hypothetical protein DICSQDRAFT_173175 [Dichomitus squalens LYAD-421 SS1]
EVM0004321.1	--	--	[B]	Chromatin structure and dynamics	MYND finger	--	Uncharacterized protein {ECO:0000313|EMBL:CDO78120.1} OS=Pycnoporus cinnabarinus (Cinnabar-red polypore) PE=4 SV=1	hypothetical protein TRAVEDRAFT_31301 [Trametes versicolor FP-101664 SS1]
EVM0007226.1	Molecular Function: calcium ion binding (GO:0005509);	--	[T]	Signal transduction mechanisms	EF hand	Peflin GN=PEF1 OS=Saccharomyces cerevisiae (strain ATCC 204508 / S288c) PE=1 SV=2	EF-hand {ECO:0000313|EMBL:EJF60685.1} OS=Dichomitus squalens (strain LYAD-421) PE=4 SV=1	EF-hand [Dichomitus squalens LYAD-421 SS1]
EVM0007473.1	--	K14300|0|dsq:DICSQDRAFT_49916|hypothetical protein; K14300 nuclear pore complex protein Nup133 (A)	[YU]	--	Non-repetitive/WGA-negative nucleoporin C-terminal	Nucleoporin nup132 GN=nup132 OS=Schizosaccharomyces pombe (strain 972 / ATCC 24843) PE=1 SV=1	Uncharacterized protein {ECO:0000313|EMBL:EIW51716.1} OS=Trametes versicolor (strain FP-101664) PE=4 SV=1	hypothetical protein DICSQDRAFT_49916 [Dichomitus squalens LYAD-421 SS1]
EVM0011454.1	--	--	--	--	Vacuole effluxer Atg22 like	Autophagy-related protein 22 GN=ATG22 OS=Pichia angusta (Yeast) PE=3 SV=1	Uncharacterized protein {ECO:0000313|EMBL:CDO75187.1} OS=Pycnoporus cinnabarinus (Cinnabar-red polypore) PE=4 SV=1	MFS general substrate transporter [Dichomitus squalens LYAD-421 SS1]
EVM0004452.1	--	--	--	--	--	--	Uncharacterized protein {ECO:0000313|EMBL:EJF56510.1} OS=Dichomitus squalens (strain LYAD-421) PE=4 SV=1	hypothetical protein DICSQDRAFT_157886 [Dichomitus squalens LYAD-421 SS1]
EVM0007754.1	--	--	--	--	Acetyltransferase (GNAT) family	--	Acyl-CoA N-acyltransferase {ECO:0000313|EMBL:EJF61274.1} OS=Dichomitus squalens (strain LYAD-421) PE=4 SV=1	acyl-CoA N-acyltransferase [Dichomitus squalens LYAD-421 SS1]
EVM0011096.1	--	--	[T]	Signal transduction mechanisms	SH3 domain	Protein csh3 GN=csh3 OS=Schizosaccharomyces pombe (strain 972 / ATCC 24843) PE=2 SV=1	SH3-domain-containing protein {ECO:0000313|EMBL:EJF55843.1} OS=Dichomitus squalens (strain LYAD-421) PE=4 SV=1	SH3-domain-containing protein [Dichomitus squalens LYAD-421 SS1]
EVM0008138.1	--	--	--	--	--	--	Uncharacterized protein {ECO:0000313|EMBL:EJF60028.1} OS=Dichomitus squalens (strain LYAD-421) PE=4 SV=1	hypothetical protein DICSQDRAFT_148149 [Dichomitus squalens LYAD-421 SS1]
EVM0002228.1	--	--	--	--	--	--	Uncharacterized protein {ECO:0000313|EMBL:EMD38982.1} OS=Ceriporiopsis subvermispora (strain B) PE=4 SV=1	hypothetical protein DICSQDRAFT_153369 [Dichomitus squalens LYAD-421 SS1]
EVM0006716.1	--	--	[R]	General function prediction only	WD domain, G-beta repeat	WD repeat protein iqw1 GN=iqw1 OS=Schizosaccharomyces pombe (strain 972 / ATCC 24843) PE=1 SV=1	WD40 repeat-like protein {ECO:0000313|EMBL:EJF61237.1} OS=Dichomitus squalens (strain LYAD-421) PE=4 SV=1	WD40 repeat-like protein [Dichomitus squalens LYAD-421 SS1]
EVM0009766.3	--	--	--	--	--	--	Uncharacterized protein {ECO:0000313|EMBL:EJF57957.1} OS=Dichomitus squalens (strain LYAD-421) PE=4 SV=1	hypothetical protein DICSQDRAFT_182887 [Dichomitus squalens LYAD-421 SS1]
EVM0004176.1	--	K14842|0|dsq:DICSQDRAFT_98540|TGF beta-inducible nuclear protein 1; K14842 ribosome biogenesis protein NSA2 (A)	[R]	General function prediction only	Ribosomal protein S8e	Ribosome biogenesis protein NSA2 GN=NSA2 OS=Cryptococcus neoformans var. neoformans serotype D (strain JEC21 / PE=3 SV=1	Uncharacterized protein {ECO:0000313|EMBL:EPT05051.1} OS=Fomitopsis pinicola (strain FP-58527) PE=4 SV=1	TGF beta-inducible nuclear protein 1 [Dichomitus squalens LYAD-421 SS1]
EVM0005992.1	--	--	--	--	--	--	Uncharacterized protein {ECO:0000313|EMBL:EJF60194.1} OS=Dichomitus squalens (strain LYAD-421) PE=4 SV=1	hypothetical protein DICSQDRAFT_155938 [Dichomitus squalens LYAD-421 SS1]
EVM0013345.1	--	--	--	--	--	--	--	hypothetical protein TRAVEDRAFT_45207 [Trametes versicolor FP-101664 SS1]
EVM0000703.1	--	--	--	--	Heterokaryon incompatibility protein (HET)	Vegetative incompatibility protein HET-E-1 GN=HET-E1 OS=Podospora anserina (Pleurage anserina) PE=3 SV=1	Uncharacterized protein {ECO:0000313|EMBL:CDO75834.1} OS=Pycnoporus cinnabarinus (Cinnabar-red polypore) PE=4 SV=1	HET-domain-containing protein [Dichomitus squalens LYAD-421 SS1]
EVM0007976.1	--	--	--	--	Cupin domain	--	RmlC-like cupin {ECO:0000313|EMBL:EJF57653.1} OS=Dichomitus squalens (strain LYAD-421) PE=4 SV=1	RmlC-like cupin [Dichomitus squalens LYAD-421 SS1]
EVM0000662.1	--	--	[R]	General function prediction only	Zinc-finger double-stranded RNA-binding	Transcription factor IIIA GN=sfc2 OS=Schizosaccharomyces pombe (strain 972 / ATCC 24843) PE=2 SV=1	Uncharacterized protein {ECO:0000313|EMBL:CDO71194.1} OS=Pycnoporus cinnabarinus (Cinnabar-red polypore) PE=4 SV=1	hypothetical protein DICSQDRAFT_54480 [Dichomitus squalens LYAD-421 SS1]
EVM0008671.1	--	--	[PQ]	--	Ferric reductase like transmembrane component	Ferric reductase transmembrane component 5 (Precursor) GN=FRE5 OS=Saccharomyces cerevisiae (strain ATCC 204508 / S288c) PE=2 SV=1	Iron reductase {ECO:0000313|EMBL:EJF61615.1} OS=Dichomitus squalens (strain LYAD-421) PE=4 SV=1	iron reductase [Dichomitus squalens LYAD-421 SS1]
EVM0006450.1	--	K15430|0|dsq:DICSQDRAFT_51154|tRNA guanosine-2'-O-methyltransferase; K15430 tRNA (guanine10-N2)-methyltransferase [EC:2.1.1.214] (A)	[L]	Replication, recombination and repair	Methyltransferase domain	tRNA (guanine(10)-N2)-methyltransferase GN=trm11 OS=Schizosaccharomyces pombe (strain 972 / ATCC 24843) PE=3 SV=2	Uncharacterized protein {ECO:0000313|EMBL:EPT04532.1} OS=Fomitopsis pinicola (strain FP-58527) PE=4 SV=1	tRNA guanosine-2&apos;-O-methyltransferase [Dichomitus squalens LYAD-421 SS1]
EVM0011972.1	--	--	--	--	--	--	Uncharacterized protein {ECO:0000313|EMBL:EJF62186.1} OS=Dichomitus squalens (strain LYAD-421) PE=4 SV=1	hypothetical protein DICSQDRAFT_161078 [Dichomitus squalens LYAD-421 SS1]
EVM0001494.1	Molecular Function: GTPase activator activity (GO:0008060); Molecular Function: zinc ion binding (GO:0008270); Biological Process: regulation of GTPase activity (GO:0032312);	K12493|0|dsq:DICSQDRAFT_68164|ArfGap-domain-containing protein; K12493 ADP-ribosylation factor GTPase-activating protein 2/3 (A)	[T]	Signal transduction mechanisms	Putative GTPase activating protein for Arf	ADP-ribosylation factor GTPase-activating protein glo3 GN=glo3 OS=Schizosaccharomyces pombe (strain 972 / ATCC 24843) PE=3 SV=2	ArfGap-domain-containing protein {ECO:0000313|EMBL:EJF57895.1} OS=Dichomitus squalens (strain LYAD-421) PE=4 SV=1	ArfGap-domain-containing protein [Dichomitus squalens LYAD-421 SS1]
EVM0009906.1	--	--	--	--	Membrane transport protein	Protein ECM3 GN=ECM3 OS=Saccharomyces cerevisiae (strain ATCC 204508 / S288c) PE=1 SV=1	Uncharacterized protein {ECO:0000313|EMBL:EJF57457.1} OS=Dichomitus squalens (strain LYAD-421) PE=4 SV=1	hypothetical protein DICSQDRAFT_69432 [Dichomitus squalens LYAD-421 SS1]
EVM0000235.2	--	--	--	--	Domain of unknown function (DUF3328)	--	Uncharacterized protein {ECO:0000313|EMBL:EJF59555.1} OS=Dichomitus squalens (strain LYAD-421) PE=4 SV=1	hypothetical protein DICSQDRAFT_171954 [Dichomitus squalens LYAD-421 SS1]
EVM0008973.1	--	--	--	--	--	--	Uncharacterized protein {ECO:0000313|EMBL:CDO75902.1} OS=Pycnoporus cinnabarinus (Cinnabar-red polypore) PE=4 SV=1	hypothetical protein BN946_scf184768.g4 [Trametes cinnabarina]
EVM0008126.2	Biological Process: protein dephosphorylation (GO:0006470); Molecular Function: protein tyrosine/serine/threonine phosphatase activity (GO:0008138);	K18042|3.14782e-116|dsq:DICSQDRAFT_102560|phosphatases II; K18042 serine/threonine/tyrosine-interacting protein (A)	[V]	Defense mechanisms	Dual specificity phosphatase, catalytic domain	Tyrosine-protein phosphatase yvh1 GN=yvh1 OS=Schizosaccharomyces pombe (strain 972 / ATCC 24843) PE=3 SV=1	Uncharacterized protein {ECO:0000313|EMBL:CDO76095.1} OS=Pycnoporus cinnabarinus (Cinnabar-red polypore) PE=4 SV=1	phosphatases II [Dichomitus squalens LYAD-421 SS1]
EVM0011099.1	--	--	--	--	--	--	Uncharacterized protein {ECO:0000313|EMBL:CDO69799.1} OS=Pycnoporus cinnabarinus (Cinnabar-red polypore) PE=4 SV=1	hypothetical protein TRAVEDRAFT_170977 [Trametes versicolor FP-101664 SS1]
EVM0009453.1	--	K07561|0|dsq:DICSQDRAFT_60750|Diphthamide synthesis; K07561 2-(3-amino-3-carboxypropyl)histidine synthase [EC:2.5.1.108] (A)	[J]	Translation, ribosomal structure and biogenesis	Putative diphthamide synthesis protein	Diphthamide biosynthesis protein 1 GN=DPH1 OS=Ustilago maydis (strain 521 / FGSC 9021) PE=3 SV=1	Diphthamide synthesis {ECO:0000313|EMBL:EJF61153.1} OS=Dichomitus squalens (strain LYAD-421) PE=4 SV=1	Diphthamide synthesis [Dichomitus squalens LYAD-421 SS1]
EVM0006595.1	--	--	--	--	--	--	Uncharacterized protein {ECO:0000313|EMBL:CDO73204.1} OS=Pycnoporus cinnabarinus (Cinnabar-red polypore) PE=4 SV=1	hypothetical protein DICSQDRAFT_46116 [Dichomitus squalens LYAD-421 SS1]
EVM0005884.1	--	--	[G]	Carbohydrate transport and metabolism	Major Facilitator Superfamily	Uncharacterized transporter ESBP6 OS=Saccharomyces cerevisiae (strain ATCC 204508 / S288c) PE=1 SV=1	Uncharacterized protein {ECO:0000313|EMBL:CDO70615.1} OS=Pycnoporus cinnabarinus (Cinnabar-red polypore) PE=4 SV=1	hypothetical protein BN946_scf184748.g12 [Trametes cinnabarina]
EVM0004120.1	--	--	--	--	--	--	Putative kinase-like protein {ECO:0000313|EMBL:EMR85629.1} OS=Botryotinia fuckeliana (strain BcDW1) PE=4 SV=1	putative kinase-like protein [Botrytis cinerea BcDW1]
EVM0007051.1	Molecular Function: calcium ion binding (GO:0005509);	K16466|1.61994e-111|dsq:DICSQDRAFT_131713|EF-hand; K16466 centrin-3 (A)	[ZD]	--	EF hand	Cell division control protein 31 GN=cdc31 OS=Schizosaccharomyces pombe (strain 972 / ATCC 24843) PE=1 SV=1	Uncharacterized protein {ECO:0000313|EMBL:EKM61781.1} OS=Phanerochaete carnosa (strain HHB-10118-sp) PE=4 SV=1	EF-hand [Dichomitus squalens LYAD-421 SS1]
EVM0003067.1	--	--	--	--	Up-regulated During Septation	Up-regulated during septation protein 1 GN=uds1 OS=Schizosaccharomyces pombe (strain 972 / ATCC 24843) PE=1 SV=1	Uncharacterized protein {ECO:0000313|EMBL:EJF62289.1} OS=Dichomitus squalens (strain LYAD-421) PE=4 SV=1	hypothetical protein DICSQDRAFT_180160 [Dichomitus squalens LYAD-421 SS1]
EVM0010244.1	--	--	[T]	Signal transduction mechanisms	Muskelin N-terminus	Mei4-dependent protein 6 GN=mde6 OS=Schizosaccharomyces pombe (strain 972 / ATCC 24843) PE=4 SV=2	Uncharacterized protein {ECO:0000313|EMBL:EPT04675.1} OS=Fomitopsis pinicola (strain FP-58527) PE=4 SV=1	hypothetical protein DICSQDRAFT_79600 [Dichomitus squalens LYAD-421 SS1]
EVM0009813.1	Biological Process: intracellular protein transport (GO:0006886); Molecular Function: protein transporter activity (GO:0008565); Biological Process: vesicle-mediated transport (GO:0016192); Cellular Component: membrane coat (GO:0030117);	--	[U]	Intracellular trafficking, secretion, and vesicular transport	Adaptin N terminal region	AP-1 complex subunit beta-1 GN=apl2 OS=Schizosaccharomyces pombe (strain 972 / ATCC 24843) PE=1 SV=1	Clathrin binding protein {ECO:0000313|EMBL:EJF55926.1} OS=Dichomitus squalens (strain LYAD-421) PE=4 SV=1	clathrin binding protein [Dichomitus squalens LYAD-421 SS1]
EVM0007675.1	--	--	--	--	O-methyltransferase	--	S-adenosyl-L-methionine-dependent methyltransferase {ECO:0000313|EMBL:EJF57429.1} OS=Dichomitus squalens (strain LYAD-421) PE=4 SV=1	S-adenosyl-L-methionine-dependent methyltransferase [Dichomitus squalens LYAD-421 SS1]
EVM0006286.1	--	--	--	--	Cupin domain	--	Uncharacterized protein {ECO:0000313|EMBL:CDO71621.1} OS=Pycnoporus cinnabarinus (Cinnabar-red polypore) PE=4 SV=1	hypothetical protein BN946_scf184911.g91 [Trametes cinnabarina]
EVM0007471.1	--	K12180|2.18217e-176|dsq:DICSQDRAFT_172997|hypothetical protein; K12180 COP9 signalosome complex subunit 7 (A)	[OT]	--	PCI domain	COP9 signalosome complex subunit 7a GN=csn-7a OS=Neurospora crassa (strain ATCC 24698 / 74-OR23-1A / CBS 708.71 / DSM PE=1 SV=1	Uncharacterized protein {ECO:0000313|EMBL:EJF58484.1} OS=Dichomitus squalens (strain LYAD-421) PE=4 SV=1	hypothetical protein DICSQDRAFT_172997 [Dichomitus squalens LYAD-421 SS1]
EVM0002898.1	--	K13120|5.43712e-63|dsq:DICSQDRAFT_95693|hypothetical protein; K13120 protein FAM32A (A)	[S]	Function unknown	Eukaryotic family of unknown function (DUF1754)	Uncharacterized protein C31G5.21 OS=Schizosaccharomyces pombe (strain 972 / ATCC 24843) PE=4 SV=1	Uncharacterized protein {ECO:0000313|EMBL:CDO72957.1} OS=Pycnoporus cinnabarinus (Cinnabar-red polypore) PE=4 SV=1	hypothetical protein DICSQDRAFT_95693 [Dichomitus squalens LYAD-421 SS1]
EVM0005744.1	--	--	--	--	--	--	Uncharacterized protein {ECO:0000313|EMBL:EJF58265.1} OS=Dichomitus squalens (strain LYAD-421) PE=4 SV=1	hypothetical protein DICSQDRAFT_182642 [Dichomitus squalens LYAD-421 SS1]
EVM0006874.1	--	K14005|0|dsq:DICSQDRAFT_182729|WD40 repeat-like protein; K14005 protein transport protein SEC31 (A)	[U]	Intracellular trafficking, secretion, and vesicular transport	WD domain, G-beta repeat	Protein transport protein sec31 GN=sec31 OS=Neurospora crassa (strain ATCC 24698 / 74-OR23-1A / CBS 708.71 / DSM PE=3 SV=1	WD40 repeat-like protein {ECO:0000313|EMBL:EJF58127.1} OS=Dichomitus squalens (strain LYAD-421) PE=4 SV=1	WD40 repeat-like protein [Dichomitus squalens LYAD-421 SS1]
EVM0012894.1	--	--	--	--	Haloacid dehalogenase-like hydrolase	--	Haloacid dehalogenase {ECO:0000313|EMBL:EJF60431.1} OS=Dichomitus squalens (strain LYAD-421) PE=4 SV=1	haloacid dehalogenase [Dichomitus squalens LYAD-421 SS1]
EVM0005662.1	--	K07119|0|dsq:DICSQDRAFT_80738|alcohol dehydrogenase; K07119 (A)	[R]	General function prediction only	Zinc-binding dehydrogenase	Zinc-type alcohol dehydrogenase-like protein PB24D3.08c GN=SPAPB24D3.08c OS=Schizosaccharomyces pombe (strain 972 / ATCC 24843) PE=3 SV=1	Uncharacterized protein {ECO:0000313|EMBL:CDO70644.1} OS=Pycnoporus cinnabarinus (Cinnabar-red polypore) PE=4 SV=1	alcohol dehydrogenase [Dichomitus squalens LYAD-421 SS1]
EVM0012650.1	--	--	--	--	--	--	Uncharacterized protein {ECO:0000313|EMBL:CDO69713.1} OS=Pycnoporus cinnabarinus (Cinnabar-red polypore) PE=4 SV=1	hypothetical protein TRAVEDRAFT_64702 [Trametes versicolor FP-101664 SS1]
EVM0001728.1	Molecular Function: actin binding (GO:0003779); Molecular Function: calcium ion binding (GO:0005509);	--	[Z]	Cytoskeleton	Calponin homology (CH) domain	Fimbrin GN=fim1 OS=Schizosaccharomyces pombe (strain 972 / ATCC 24843) PE=1 SV=1	Fimbrin {ECO:0000313|EMBL:EJF58977.1} OS=Dichomitus squalens (strain LYAD-421) PE=4 SV=1	fimbrin [Dichomitus squalens LYAD-421 SS1]
EVM0007696.1	Molecular Function: helicase activity (GO:0004386); Biological Process: DNA metabolic process (GO:0006259);	K10901|0|dsq:DICSQDRAFT_57685|ATP-dependent RNA helicase; K10901 bloom syndrome protein [EC:3.6.4.12] (A)	[L]	Replication, recombination and repair	DEAD/DEAH box helicase	ATP-dependent DNA helicase hus2/rqh1 GN=rqh1 OS=Schizosaccharomyces pombe (strain 972 / ATCC 24843) PE=1 SV=1	Uncharacterized protein {ECO:0000313|EMBL:CDO69123.1} OS=Pycnoporus cinnabarinus (Cinnabar-red polypore) PE=4 SV=1	ATP-dependent RNA helicase [Dichomitus squalens LYAD-421 SS1]
EVM0012886.1	--	--	--	--	--	--	Uncharacterized protein {ECO:0000313|EMBL:EJF59733.1} OS=Dichomitus squalens (strain LYAD-421) PE=4 SV=1	hypothetical protein DICSQDRAFT_168727 [Dichomitus squalens LYAD-421 SS1]
EVM0011424.1	--	K00681|0|dsq:DICSQDRAFT_164807|gamma-glutamyltranspeptidase; K00681 gamma-glutamyltranspeptidase / glutathione hydrolase [EC:2.3.2.2 3.4.19.13] (A)	[E]	Amino acid transport and metabolism	Gamma-glutamyltranspeptidase	Gamma-glutamyltranspeptidase 2 light chain (Precursor) GN=ggt2 OS=Schizosaccharomyces pombe (strain 972 / ATCC 24843) PE=2 SV=1	Uncharacterized protein {ECO:0000313|EMBL:CDO73517.1} OS=Pycnoporus cinnabarinus (Cinnabar-red polypore) PE=4 SV=1	gamma-glutamyltranspeptidase [Dichomitus squalens LYAD-421 SS1]
EVM0011360.1	Molecular Function: acid-amino acid ligase activity (GO:0016881);	K10573|1.39172e-118|dsq:DICSQDRAFT_89108|ubiquitin-conjugating enzyme; K10573 ubiquitin-conjugating enzyme E2 A [EC:6.3.2.19] (A)	[O]	Posttranslational modification, protein turnover, chaperones	Ubiquitin-conjugating enzyme	Ubiquitin-conjugating enzyme E2 2 GN=UBC2 OS=Ustilago maydis (strain 521 / FGSC 9021) PE=3 SV=1	Ubiquitin-conjugating enzyme {ECO:0000313|EMBL:EJF59714.1} OS=Dichomitus squalens (strain LYAD-421) PE=3 SV=1	ubiquitin-conjugating enzyme [Dichomitus squalens LYAD-421 SS1]
EVM0011643.1	--	--	--	--	--	--	Uncharacterized protein {ECO:0000313|EMBL:CDO73693.1} OS=Pycnoporus cinnabarinus (Cinnabar-red polypore) PE=4 SV=1	hypothetical protein DICSQDRAFT_101839 [Dichomitus squalens LYAD-421 SS1]
EVM0004447.1	Molecular Function: NADH dehydrogenase (ubiquinone) activity (GO:0008137); Molecular Function: FMN binding (GO:0010181); Molecular Function: NAD binding (GO:0051287); Molecular Function: 4 iron, 4 sulfur cluster binding (GO:0051539); Biological Process: oxidation-reduction process (GO:0055114);	K03942|0|dsq:DICSQDRAFT_93733|NADH-ubiquinone oxidoreductase; K03942 NADH dehydrogenase (ubiquinone) flavoprotein 1 [EC:1.6.5.3 1.6.99.3] (A)	[C]	Energy production and conversion	Respiratory-chain NADH dehydrogenase 51 Kd subunit	NADH-ubiquinone oxidoreductase 51 kDa subunit, mitochondrial (Precursor) GN=nuo-51 OS=Neurospora crassa (strain ATCC 24698 / 74-OR23-1A / CBS 708.71 / DSM PE=2 SV=2	NADH-ubiquinone oxidoreductase {ECO:0000313|EMBL:EJF56341.1} OS=Dichomitus squalens (strain LYAD-421) PE=4 SV=1	NADH-ubiquinone oxidoreductase [Dichomitus squalens LYAD-421 SS1]
EVM0004821.1	Biological Process: DNA metabolic process (GO:0006259);	--	[D]	Cell cycle control, cell division, chromosome partitioning	PIF1-like helicase	ATP-dependent DNA helicase RRM3 {ECO:0000255|HAMAP-Rule:MF_03177} GN=YHR031C OS=Saccharomyces cerevisiae (strain ATCC 204508 / S288c) PE=1 SV=1	Uncharacterized protein {ECO:0000313|EMBL:CDO69287.1} OS=Pycnoporus cinnabarinus (Cinnabar-red polypore) PE=4 SV=1	hypothetical protein BN946_scf184976.g6 [Trametes cinnabarina]
EVM0009159.1	Molecular Function: nucleic acid binding (GO:0003676);	K02332|0|dsq:DICSQDRAFT_183548|gamma DNA-directed DNA polymerase; K02332 DNA polymerase gamma 1 [EC:2.7.7.7] (A)	[L]	Replication, recombination and repair	DNA polymerase family A	DNA polymerase gamma, mitochondrial (Precursor) GN=mip-1 OS=Neurospora crassa (strain ATCC 24698 / 74-OR23-1A / CBS 708.71 / DSM PE=3 SV=2	Gamma DNA-directed DNA polymerase {ECO:0000313|EMBL:EJF56908.1} OS=Dichomitus squalens (strain LYAD-421) PE=3 SV=1	gamma DNA-directed DNA polymerase [Dichomitus squalens LYAD-421 SS1]
EVM0006935.1	Biological Process: metabolic process (GO:0008152); Molecular Function: oxidoreductase activity (GO:0016491); Molecular Function: metal ion binding (GO:0046872);	--	[S]	Function unknown	Essential protein Yae1, N terminal	--	Uncharacterized protein {ECO:0000313|EMBL:EJF61905.1} OS=Dichomitus squalens (strain LYAD-421) PE=4 SV=1	hypothetical protein DICSQDRAFT_85407 [Dichomitus squalens LYAD-421 SS1]
EVM0000290.1	--	--	--	--	--	--	Uncharacterized protein {ECO:0000313|EMBL:CDO69789.1} OS=Pycnoporus cinnabarinus (Cinnabar-red polypore) PE=4 SV=1	hypothetical protein DICSQDRAFT_134004 [Dichomitus squalens LYAD-421 SS1]
EVM0004562.1	Molecular Function: actin binding (GO:0003779); Molecular Function: phospholipid binding (GO:0005543);	--	[Z]	Cytoskeleton	ANTH domain	Endocytosis protein end4 GN=end4 OS=Schizosaccharomyces pombe (strain 972 / ATCC 24843) PE=1 SV=2	Uncharacterized protein {ECO:0000313|EMBL:EMD41891.1} OS=Ceriporiopsis subvermispora (strain B) PE=4 SV=1	cytoskeleton assembly control protein [Dichomitus squalens LYAD-421 SS1]
EVM0006058.1	--	--	--	--	--	--	Predicted protein {ECO:0000313|EMBL:EDR04222.1} OS=Laccaria bicolor (strain S238N-H82 / ATCC MYA-4686) PE=4 SV=1	hypothetical protein TRAVEDRAFT_35644 [Trametes versicolor FP-101664 SS1]
EVM0009351.1	--	K01934|2.2599e-136|dsq:DICSQDRAFT_108388|5-formyltetrahydrofolate cyclo-ligase; K01934 5-formyltetrahydrofolate cyclo-ligase [EC:6.3.3.2] (A)	[H]	Coenzyme transport and metabolism	5-formyltetrahydrofolate cyclo-ligase family	Probable 5-formyltetrahydrofolate cyclo-ligase GN=SPBC1703.08c OS=Schizosaccharomyces pombe (strain 972 / ATCC 24843) PE=3 SV=1	5-formyltetrahydrofolate cyclo-ligase {ECO:0000313|EMBL:EJF59771.1} OS=Dichomitus squalens (strain LYAD-421) PE=4 SV=1	5-formyltetrahydrofolate cyclo-ligase [Dichomitus squalens LYAD-421 SS1]
EVM0007501.1	--	--	--	--	--	--	Uncharacterized protein {ECO:0000313|EMBL:EMD31924.1} OS=Ceriporiopsis subvermispora (strain B) PE=4 SV=1	hypothetical protein TRAVEDRAFT_68408 [Trametes versicolor FP-101664 SS1]
EVM0000071.1	--	--	--	--	--	--	Uncharacterized protein {ECO:0000313|EMBL:CCM00030.1} OS=Fibroporia radiculosa (strain TFFH 294) PE=4 SV=1	predicted protein [Fibroporia radiculosa]
EVM0007029.1	Molecular Function: ATP binding (GO:0005524); Cellular Component: cytoplasm (GO:0005737); Biological Process: protein folding (GO:0006457); Molecular Function: unfolded protein binding (GO:0051082);	K03350|0|dsq:DICSQDRAFT_49884|protein prenylyltransferase; K03350 anaphase-promoting complex subunit 3 (A)	[O]	Posttranslational modification, protein turnover, chaperones	TCP-1/cpn60 chaperonin family	T-complex protein 1 subunit alpha GN=cct1 OS=Schizosaccharomyces pombe (strain 972 / ATCC 24843) PE=3 SV=1	T-complex protein 1 subunit alpha {ECO:0000256|RuleBase:RU004191} OS=Fibroporia radiculosa (strain TFFH 294) PE=3 SV=1	protein prenylyltransferase [Dichomitus squalens LYAD-421 SS1]
EVM0005750.1	--	--	--	--	--	--	Uncharacterized protein {ECO:0000313|EMBL:EIW51995.1} OS=Trametes versicolor (strain FP-101664) PE=4 SV=1	hypothetical protein TRAVEDRAFT_134703 [Trametes versicolor FP-101664 SS1]
EVM0001471.1	--	--	[S]	Function unknown	Uncharacterised protein family (UPF0220)	UPF0220 protein C8D2.02c OS=Schizosaccharomyces pombe (strain 972 / ATCC 24843) PE=3 SV=1	Uncharacterized protein {ECO:0000313|EMBL:EJF58379.1} OS=Dichomitus squalens (strain LYAD-421) PE=4 SV=1	hypothetical protein DICSQDRAFT_139460 [Dichomitus squalens LYAD-421 SS1]
EVM0003009.1	Cellular Component: chromosome (GO:0005694); Biological Process: chromosome segregation (GO:0007059); Biological Process: cell cycle process (GO:0022402); Biological Process: chromosome condensation (GO:0030261); Biological Process: cellular response to stimulus (GO:0051716);	K06674|0|dsq:DICSQDRAFT_161869|condensin complex subunit SMC2; K06674 structural maintenance of chromosome 2 (A)	[BD]	--	RecF/RecN/SMC N terminal domain	Structural maintenance of chromosomes protein 2 GN=cut14 OS=Schizosaccharomyces pombe (strain 972 / ATCC 24843) PE=1 SV=2	Structural maintenance of chromosomes protein {ECO:0000256|PIRNR:PIRNR005719} OS=Dichomitus squalens (strain LYAD-421) PE=3 SV=1	condensin complex subunit SMC2 [Dichomitus squalens LYAD-421 SS1]
EVM0013205.1	--	--	[O]	Posttranslational modification, protein turnover, chaperones	Zinc finger, C3HC4 type (RING finger)	--	Uncharacterized protein {ECO:0000313|EMBL:EJF57371.1} OS=Dichomitus squalens (strain LYAD-421) PE=4 SV=1	hypothetical protein DICSQDRAFT_163437 [Dichomitus squalens LYAD-421 SS1]
EVM0008578.1	--	K13993|1.15272e-78|dsq:DICSQDRAFT_182911|small heat shock protein; K13993 HSP20 family protein (A)	[O]	Posttranslational modification, protein turnover, chaperones	Hsp20/alpha crystallin family	Heat shock protein 16 GN=hsp16 OS=Schizosaccharomyces pombe (strain 972 / ATCC 24843) PE=1 SV=1	Uncharacterized protein {ECO:0000313|EMBL:CDO76514.1} OS=Pycnoporus cinnabarinus (Cinnabar-red polypore) PE=3 SV=1	hypothetical protein BN946_scf184712.g4 [Trametes cinnabarina]
EVM0013281.1	--	K18174|1.67684e-37|dsq:DICSQDRAFT_41535|hypothetical protein; K18174 cytochrome c oxidase assembly factor 2 (A)	--	--	--	--	Uncharacterized protein {ECO:0000313|EMBL:CDO74047.1} OS=Pycnoporus cinnabarinus (Cinnabar-red polypore) PE=4 SV=1	hypothetical protein TRAVEDRAFT_116512 [Trametes versicolor FP-101664 SS1]
EVM0004326.1	Biological Process: protein peptidyl-prolyl isomerization (GO:0000413); Molecular Function: peptidyl-prolyl cis-trans isomerase activity (GO:0003755); Biological Process: protein folding (GO:0006457);	--	[O]	Posttranslational modification, protein turnover, chaperones	Cyclophilin type peptidyl-prolyl cis-trans isomerase/CLD	Peptidyl-prolyl cis-trans isomerase GN=ppi1 OS=Schizosaccharomyces pombe (strain 972 / ATCC 24843) PE=3 SV=1	Peptidyl-prolyl cis-trans isomerase {ECO:0000256|RuleBase:RU000493} OS=Ganoderma lucidum (Ling zhi medicinal fungus) PE=2 SV=1	cyclophilin [Ganoderma lucidum]
EVM0012438.1	--	--	--	--	--	--	Uncharacterized protein {ECO:0000313|EMBL:CDO71406.1} OS=Pycnoporus cinnabarinus (Cinnabar-red polypore) PE=4 SV=1	hypothetical protein BN946_scf184908.g164 [Trametes cinnabarina]
EVM0001438.3	--	--	--	--	--	--	Uncharacterized protein {ECO:0000313|EMBL:CDO74263.1} OS=Pycnoporus cinnabarinus (Cinnabar-red polypore) PE=4 SV=1	hypothetical protein TRAVEDRAFT_59579 [Trametes versicolor FP-101664 SS1]
EVM0002165.1	--	--	--	--	--	--	Uncharacterized protein {ECO:0000313|EMBL:CDO77102.1} OS=Pycnoporus cinnabarinus (Cinnabar-red polypore) PE=4 SV=1	hypothetical protein DICSQDRAFT_99337 [Dichomitus squalens LYAD-421 SS1]
EVM0004228.1	--	--	--	--	--	--	Uncharacterized protein {ECO:0000313|EMBL:CDO76352.1} OS=Pycnoporus cinnabarinus (Cinnabar-red polypore) PE=4 SV=1	hypothetical protein TRAVEDRAFT_45061 [Trametes versicolor FP-101664 SS1]
EVM0009167.1	--	--	--	--	--	--	Uncharacterized protein {ECO:0000313|EMBL:EJF55675.1} OS=Dichomitus squalens (strain LYAD-421) PE=4 SV=1	hypothetical protein DICSQDRAFT_184244 [Dichomitus squalens LYAD-421 SS1]
EVM0009518.1	Molecular Function: phosphogluconate dehydrogenase (decarboxylating) activity (GO:0004616); Biological Process: pentose-phosphate shunt (GO:0006098); Biological Process: valine metabolic process (GO:0006573); Molecular Function: 3-hydroxyisobutyrate dehydrogenase activity (GO:0008442); Molecular Function: coenzyme binding (GO:0050662);	--	[R]	General function prediction only	NAD binding domain of 6-phosphogluconate dehydrogenase	--	3-hydroxyisobutyrate dehydrogenase {ECO:0000256|RuleBase:RU910714} OS=Pycnoporus cinnabarinus (Cinnabar-red polypore) PE=3 SV=1	3-hydroxyisobutyrate dehydrogenase [Dichomitus squalens LYAD-421 SS1]
EVM0012904.1	--	--	--	--	Meiotically up-regulated gene 113	--	Uncharacterized protein {ECO:0000313|EMBL:EKM55964.1} OS=Phanerochaete carnosa (strain HHB-10118-sp) PE=4 SV=1	hypothetical protein PLICRDRAFT_108997 [Plicaturopsis crispa FD-325 SS-3]
EVM0010536.1	--	--	--	--	--	--	Uncharacterized protein {ECO:0000313|EMBL:EJF56986.1} OS=Dichomitus squalens (strain LYAD-421) PE=4 SV=1	hypothetical protein DICSQDRAFT_163615 [Dichomitus squalens LYAD-421 SS1]
EVM0000833.1	--	--	[L]	Replication, recombination and repair	DEAD/DEAH box helicase	ATP-dependent DNA helicase hus2/rqh1 GN=rqh1 OS=Schizosaccharomyces pombe (strain 972 / ATCC 24843) PE=1 SV=1	Uncharacterized protein {ECO:0000313|EMBL:EPS97624.1} OS=Fomitopsis pinicola (strain FP-58527) PE=4 SV=1	hypothetical protein FOMPIDRAFT_117753 [Fomitopsis pinicola FP-58527 SS1]
EVM0002763.1	--	--	--	--	--	--	--	hypothetical protein DICSQDRAFT_178253 [Dichomitus squalens LYAD-421 SS1]
EVM0003909.1	--	--	--	--	--	--	Uncharacterized protein {ECO:0000313|EMBL:EJF57254.1} OS=Dichomitus squalens (strain LYAD-421) PE=4 SV=1	hypothetical protein DICSQDRAFT_183303 [Dichomitus squalens LYAD-421 SS1]
EVM0001162.1	--	--	--	--	--	--	Uncharacterized protein {ECO:0000313|EMBL:CDO76992.1} OS=Pycnoporus cinnabarinus (Cinnabar-red polypore) PE=4 SV=1	hypothetical protein BN946_scf184298.g19 [Trametes cinnabarina]
EVM0004920.1	--	--	--	--	--	--	Uncharacterized protein {ECO:0000313|EMBL:CDO75467.1} OS=Pycnoporus cinnabarinus (Cinnabar-red polypore) PE=4 SV=1	hypothetical protein BN946_scf184935.g3 [Trametes cinnabarina]
EVM0011883.1	Molecular Function: structural constituent of ribosome (GO:0003735); Cellular Component: ribosome (GO:0005840); Biological Process: translation (GO:0006412); Molecular Function: metal ion binding (GO:0046872);	K02978|1.70196e-53|dsq:DICSQDRAFT_164315|40S ribosomal protein S27; K02978 small subunit ribosomal protein S27e (A)	[J]	Translation, ribosomal structure and biogenesis	Ribosomal protein S27	40S ribosomal protein S27 GN=rps27 OS=Schizosaccharomyces pombe (strain 972 / ATCC 24843) PE=3 SV=1	40S ribosomal protein S27 {ECO:0000256|RuleBase:RU000671} OS=Heterobasidion irregulare TC 32-1 PE=3 SV=1	40S ribosomal protein S27 [Dichomitus squalens LYAD-421 SS1]
EVM0012484.1	--	--	--	--	Fungal cellulose binding domain	Endo-1,4-beta-xylanase C (Precursor) GN=xynC OS=Phanerochaete chrysosporium (White-rot fungus) PE=1 SV=1	Uncharacterized protein {ECO:0000313|EMBL:EJF61867.1} OS=Dichomitus squalens (strain LYAD-421) PE=4 SV=1	hypothetical protein DICSQDRAFT_59956 [Dichomitus squalens LYAD-421 SS1]
EVM0013350.2	--	--	--	--	--	--	Uncharacterized protein {ECO:0000313|EMBL:EJF59125.1} (Fragment) OS=Dichomitus squalens (strain LYAD-421) PE=4 SV=1	hypothetical protein DICSQDRAFT_65656, partial [Dichomitus squalens LYAD-421 SS1]
EVM0002901.1	--	--	[K]	Transcription	Fork head domain	Fork head protein homolog 2 GN=FKH2 OS=Saccharomyces cerevisiae (strain ATCC 204508 / S288c) PE=1 SV=1	Uncharacterized protein {ECO:0000313|EMBL:CCM03752.1} OS=Fibroporia radiculosa (strain TFFH 294) PE=4 SV=1	hypothetical protein DICSQDRAFT_142725 [Dichomitus squalens LYAD-421 SS1]
EVM0012957.1	--	--	[G]	Carbohydrate transport and metabolism	Major Facilitator Superfamily	Riboflavin transporter MCH5 GN=MCH5 OS=Saccharomyces cerevisiae (strain ATCC 204508 / S288c) PE=1 SV=2	MFS general substrate transporter {ECO:0000313|EMBL:EJF55723.1} OS=Dichomitus squalens (strain LYAD-421) PE=4 SV=1	MFS general substrate transporter [Dichomitus squalens LYAD-421 SS1]
EVM0000298.1	--	K01247|1.02773e-151|dsq:DICSQDRAFT_159443|hypothetical protein; K01247 DNA-3-methyladenine glycosylase II [EC:3.2.2.21] (A)	[L]	Replication, recombination and repair	HhH-GPD superfamily base excision DNA repair protein	DNA-3-methyladenine glycosylase 1 GN=mag1 OS=Schizosaccharomyces pombe (strain 972 / ATCC 24843) PE=1 SV=1	Uncharacterized protein {ECO:0000313|EMBL:EMD37811.1} OS=Ceriporiopsis subvermispora (strain B) PE=4 SV=1	DNA glycosylase [Trametes versicolor FP-101664 SS1]
EVM0002841.1	--	--	--	--	Domain of unknown function (DUF4112)	Uncharacterized membrane protein YLR326W GN=YLR326W OS=Saccharomyces cerevisiae (strain ATCC 204508 / S288c) PE=1 SV=1	Uncharacterized protein {ECO:0000313|EMBL:CDO75548.1} OS=Pycnoporus cinnabarinus (Cinnabar-red polypore) PE=4 SV=1	hypothetical protein DICSQDRAFT_100518 [Dichomitus squalens LYAD-421 SS1]
EVM0013292.1	--	--	--	--	--	--	Uncharacterized protein {ECO:0000313|EMBL:EJF56377.1} OS=Dichomitus squalens (strain LYAD-421) PE=4 SV=1	hypothetical protein DICSQDRAFT_183846 [Dichomitus squalens LYAD-421 SS1]
EVM0000110.1	--	--	--	--	--	--	Uncharacterized protein {ECO:0000313|EMBL:CDO77660.1} OS=Pycnoporus cinnabarinus (Cinnabar-red polypore) PE=4 SV=1	hypothetical protein BN946_scf184969.g11 [Trametes cinnabarina]
EVM0008134.1	--	--	--	--	TAP-like protein	--	Uncharacterized protein {ECO:0000313|EMBL:EJF61451.1} OS=Dichomitus squalens (strain LYAD-421) PE=4 SV=1	hypothetical protein DICSQDRAFT_170201 [Dichomitus squalens LYAD-421 SS1]
EVM0004446.1	--	--	--	--	--	--	Uncharacterized protein {ECO:0000313|EMBL:CDO68195.1} OS=Pycnoporus cinnabarinus (Cinnabar-red polypore) PE=4 SV=1	hypothetical protein BN946_scf184938.g47 [Trametes cinnabarina]
EVM0003259.2	Molecular Function: nucleotide binding (GO:0000166);	--	[U]	Intracellular trafficking, secretion, and vesicular transport	Ras family	Ras-like GTP-binding protein RYL2 GN=RYL2 OS=Yarrowia lipolytica (strain CLIB 122 / E 150) PE=3 SV=2	Uncharacterized protein {ECO:0000313|EMBL:EJF61287.1} OS=Dichomitus squalens (strain LYAD-421) PE=3 SV=1	hypothetical protein DICSQDRAFT_136853 [Dichomitus squalens LYAD-421 SS1]
EVM0004160.2	--	--	--	--	--	--	Uncharacterized protein {ECO:0000313|EMBL:CDO74076.1} OS=Pycnoporus cinnabarinus (Cinnabar-red polypore) PE=4 SV=1	hypothetical protein DICSQDRAFT_126110 [Dichomitus squalens LYAD-421 SS1]
EVM0001084.1	--	--	--	--	--	--	Uncharacterized protein {ECO:0000313|EMBL:CCL99288.1} OS=Fibroporia radiculosa (strain TFFH 294) PE=4 SV=1	hypothetical protein PLICRDRAFT_628411 [Plicaturopsis crispa FD-325 SS-3]
EVM0002197.1	--	--	--	--	Protein of unknown function (DUF2420)	--	Uncharacterized protein {ECO:0000313|EMBL:EMD38587.1} OS=Ceriporiopsis subvermispora (strain B) PE=4 SV=1	hypothetical protein DICSQDRAFT_131914 [Dichomitus squalens LYAD-421 SS1]
EVM0007757.1	--	--	--	--	--	--	Uncharacterized protein {ECO:0000313|EMBL:EJF60664.1} OS=Dichomitus squalens (strain LYAD-421) PE=4 SV=1	hypothetical protein DICSQDRAFT_147671 [Dichomitus squalens LYAD-421 SS1]
EVM0006321.1	--	--	--	--	--	--	Uncharacterized protein {ECO:0000313|EMBL:EJF56594.1} OS=Dichomitus squalens (strain LYAD-421) PE=4 SV=1	hypothetical protein DICSQDRAFT_112889 [Dichomitus squalens LYAD-421 SS1]
EVM0003998.1	Biological Process: carbohydrate metabolic process (GO:0005975); Molecular Function: cellulose 1,4-beta-cellobiosidase activity (GO:0016162);	--	--	--	Glycosyl hydrolase family 7	Exoglucanase 1 (Precursor) GN=CBH1 OS=Phanerochaete chrysosporium (White-rot fungus) PE=2 SV=1	Glucanase {ECO:0000256|RuleBase:RU361164} OS=Pycnoporus cinnabarinus (Cinnabar-red polypore) PE=3 SV=1	cellobiohydrolaseI [Dichomitus squalens LYAD-421 SS1]
EVM0006017.1	--	--	--	--	--	--	Uncharacterized protein {ECO:0000313|EMBL:CDO76489.1} OS=Pycnoporus cinnabarinus (Cinnabar-red polypore) PE=4 SV=1	hypothetical protein DICSQDRAFT_46241 [Dichomitus squalens LYAD-421 SS1]
EVM0012495.1	--	K17066|0|dsq:DICSQDRAFT_149587|alcohol oxidase-like protein; K17066 alcohol oxidase [EC:1.1.3.13] (A)	[R]	General function prediction only	GMC oxidoreductase	Alcohol oxidase GN=MOX OS=Pichia angusta (Yeast) PE=1 SV=1	Alcohol oxidase-like protein {ECO:0000313|EMBL:EJF57772.1} OS=Dichomitus squalens (strain LYAD-421) PE=4 SV=1	alcohol oxidase-like protein [Dichomitus squalens LYAD-421 SS1]
EVM0006406.1	Biological Process: sulfate assimilation (GO:0000103); Molecular Function: adenylylsulfate kinase activity (GO:0004020); Molecular Function: ATP binding (GO:0005524); Biological Process: phosphorylation (GO:0016310); Biological Process: hydrogen sulfide biosynthetic process (GO:0070814);	K00860|1.01239e-134|dsq:DICSQDRAFT_78846|adenylylsulfate kinase; K00860 adenylylsulfate kinase [EC:2.7.1.25] (A)	[P]	Inorganic ion transport and metabolism	Adenylylsulphate kinase	Adenylyl-sulfate kinase GN=MET14 OS=Saccharomyces cerevisiae (strain ATCC 204508 / S288c) PE=1 SV=1	Adenylyl-sulfate kinase {ECO:0000256|RuleBase:RU004347} OS=Jaapia argillacea MUCL 33604 PE=3 SV=1	adenylylsulfate kinase [Dichomitus squalens LYAD-421 SS1]
EVM0005137.1	--	--	--	--	--	--	Uncharacterized protein {ECO:0000313|EMBL:EIN04127.1} OS=Punctularia strigosozonata (strain HHB-11173) PE=4 SV=1	hypothetical protein DICSQDRAFT_101821 [Dichomitus squalens LYAD-421 SS1]
EVM0006535.1	--	--	--	--	--	--	Uncharacterized protein {ECO:0000313|EMBL:EJF57221.1} OS=Dichomitus squalens (strain LYAD-421) PE=4 SV=1	hypothetical protein DICSQDRAFT_174173 [Dichomitus squalens LYAD-421 SS1]
EVM0010311.1	--	--	--	--	BTB/POZ domain	--	Uncharacterized protein {ECO:0000313|EMBL:CDO71429.1} OS=Pycnoporus cinnabarinus (Cinnabar-red polypore) PE=4 SV=1	hypothetical protein DICSQDRAFT_145706 [Dichomitus squalens LYAD-421 SS1]
EVM0004872.1	Cellular Component: integral component of membrane (GO:0016021); Biological Process: transmembrane transport (GO:0055085);	--	[G]	Carbohydrate transport and metabolism	Major Facilitator Superfamily	Uncharacterized transporter C1002.16c GN=SPAC1002.16c OS=Schizosaccharomyces pombe (strain 972 / ATCC 24843) PE=3 SV=1	MFS general substrate transporter {ECO:0000313|EMBL:EJF55809.1} OS=Dichomitus squalens (strain LYAD-421) PE=4 SV=1	MFS general substrate transporter [Dichomitus squalens LYAD-421 SS1]
EVM0006131.1	--	--	[S]	Function unknown	SRR1	SRR1-like protein GN=SPBC14C8.13 OS=Schizosaccharomyces pombe (strain 972 / ATCC 24843) PE=3 SV=1	Uncharacterized protein {ECO:0000313|EMBL:EMD38602.1} OS=Ceriporiopsis subvermispora (strain B) PE=4 SV=1	SRR1-domain-containing protein [Dichomitus squalens LYAD-421 SS1]
EVM0012745.1	--	--	--	--	Sin3 binding region of histone deacetylase complex subunit SAP30	--	Uncharacterized protein {ECO:0000313|EMBL:CDO71757.1} OS=Pycnoporus cinnabarinus (Cinnabar-red polypore) PE=4 SV=1	hypothetical protein BN946_scf184920.g41 [Trametes cinnabarina]
EVM0008598.1	--	--	--	--	Hsp20/alpha crystallin family	--	Uncharacterized protein {ECO:0000313|EMBL:EJF61855.1} OS=Dichomitus squalens (strain LYAD-421) PE=3 SV=1	hypothetical protein DICSQDRAFT_146975 [Dichomitus squalens LYAD-421 SS1]
EVM0003624.1	--	--	[P]	Inorganic ion transport and metabolism	Phosphate transport (Pho88)	Inorganic phosphate transport protein PHO88 GN=PHO88 OS=Saccharomyces cerevisiae (strain ATCC 204508 / S288c) PE=1 SV=1	Inorganic phosphate transporter {ECO:0000313|EMBL:EJF56012.1} OS=Dichomitus squalens (strain LYAD-421) PE=4 SV=1	inorganic phosphate transporter [Dichomitus squalens LYAD-421 SS1]
EVM0005987.1	Cellular Component: integral component of membrane (GO:0016021); Biological Process: vesicle-mediated transport (GO:0016192);	--	[U]	Intracellular trafficking, secretion, and vesicular transport	Got1/Sft2-like family	Protein transport protein SFT2 GN=SFT2 OS=Saccharomyces cerevisiae (strain ATCC 204508 / S288c) PE=1 SV=1	ER-to-golgi vesicle protein transport Sft2 {ECO:0000313|EMBL:EJF60130.1} OS=Dichomitus squalens (strain LYAD-421) PE=4 SV=1	ER-to-golgi vesicle protein transport Sft2 [Dichomitus squalens LYAD-421 SS1]
EVM0001367.1	Molecular Function: binding (GO:0005488); Biological Process: transcription, DNA-templated (GO:0006351);	--	--	--	Fungal specific transcription factor domain	Transcriptional activator protein acu-15 GN=acu-15 OS=Neurospora crassa (strain ATCC 24698 / 74-OR23-1A / CBS 708.71 / DSM PE=1 SV=2	Uncharacterized protein {ECO:0000313|EMBL:CDO73555.1} OS=Pycnoporus cinnabarinus (Cinnabar-red polypore) PE=4 SV=1	hypothetical protein DICSQDRAFT_132247 [Dichomitus squalens LYAD-421 SS1]
EVM0007126.1	Molecular Function: N-acetyltransferase activity (GO:0008080);	K00670|1.12622e-95|dsq:DICSQDRAFT_150521|acyl-CoA N-acyltransferase; K00670 peptide alpha-N-acetyltransferase [EC:2.3.1.88] (A)	[R]	General function prediction only	Acetyltransferase (GNAT) family	N-terminal acetyltransferase A complex catalytic subunit ard1 GN=ard1 OS=Schizosaccharomyces pombe (strain 972 / ATCC 24843) PE=1 SV=1	Acyl-CoA N-acyltransferase {ECO:0000313|EMBL:EJF56266.1} OS=Dichomitus squalens (strain LYAD-421) PE=4 SV=1	acyl-CoA N-acyltransferase [Dichomitus squalens LYAD-421 SS1]
EVM0003856.1	--	--	--	--	Alpha/beta hydrolase family	--	Uncharacterized protein {ECO:0000313|EMBL:EJF60429.1} OS=Dichomitus squalens (strain LYAD-421) PE=4 SV=1	hypothetical protein DICSQDRAFT_166050 [Dichomitus squalens LYAD-421 SS1]
EVM0009953.2	Cellular Component: 1,3-beta-D-glucan synthase complex (GO:0000148); Molecular Function: 1,3-beta-D-glucan synthase activity (GO:0003843); Biological Process: (1->3)-beta-D-glucan biosynthetic process (GO:0006075);	K00706|0|dsq:DICSQDRAFT_49951|1,3-beta-glucan synthase; K00706 1,3-beta-glucan synthase [EC:2.4.1.34] (A)	[M]	Cell wall/membrane/envelope biogenesis	1,3-beta-glucan synthase component	1,3-beta-glucan synthase component FKS1 GN=FKS1 OS=Cryptococcus neoformans var. grubii serotype A (strain H99 / ATCC PE=3 SV=3	Glycosyltransferase Family 48 protein {ECO:0000313|EMBL:CDO68303.1} OS=Pycnoporus cinnabarinus (Cinnabar-red polypore) PE=4 SV=1	Glycosyltransferase Family 48 protein [Trametes cinnabarina]
EVM0007552.1	Biological Process: lipid metabolic process (GO:0006629); Molecular Function: hydrolase activity (GO:0016787);	--	[R]	General function prediction only	Domain of unknown function (DUF3336)	Patatin-like phospholipase domain-containing protein CNBE2340 GN=CNBE2340 OS=Cryptococcus neoformans var. neoformans serotype D (strain B-3501A) PE=3 SV=1	Patatin-domain-containing protein {ECO:0000313|EMBL:EJF61243.1} OS=Dichomitus squalens (strain LYAD-421) PE=4 SV=1	patatin-domain-containing protein [Dichomitus squalens LYAD-421 SS1]
EVM0012514.1	--	K10879|1.01692e-167|dsq:DICSQDRAFT_142566|hypothetical protein; K10879 DNA-repair protein XRCC2 (A)	[L]	Replication, recombination and repair	--	--	Uncharacterized protein {ECO:0000313|EMBL:CDO76615.1} OS=Pycnoporus cinnabarinus (Cinnabar-red polypore) PE=4 SV=1	hypothetical protein DICSQDRAFT_142566 [Dichomitus squalens LYAD-421 SS1]
EVM0009266.1	Molecular Function: alpha-amylase activity (GO:0004556); Molecular Function: calcium ion binding (GO:0005509); Biological Process: carbohydrate catabolic process (GO:0016052);	K01176|0|dsq:DICSQDRAFT_84199|alpha-amylase; K01176 alpha-amylase [EC:3.2.1.1] (A)	[G]	Carbohydrate transport and metabolism	Alpha amylase, catalytic domain	Alpha-amylase 1 (Precursor) GN=LKA1 OS=Lipomyces kononenkoae (Yeast) PE=1 SV=2	Glycoside Hydrolase Family 13 protein {ECO:0000313|EMBL:CDO69036.1} OS=Pycnoporus cinnabarinus (Cinnabar-red polypore) PE=4 SV=1	alpha-amylase [Dichomitus squalens LYAD-421 SS1]
EVM0012441.1	--	--	[K]	Transcription	Transcription initiation factor TFIID component TAF4 family	Transcription initiation factor TFIID subunit 4 GN=taf4 OS=Schizosaccharomyces pombe (strain 972 / ATCC 24843) PE=3 SV=1	Uncharacterized protein {ECO:0000313|EMBL:EJF62176.1} OS=Dichomitus squalens (strain LYAD-421) PE=4 SV=1	hypothetical protein DICSQDRAFT_58605 [Dichomitus squalens LYAD-421 SS1]
EVM0001876.2	--	--	--	--	--	--	Uncharacterized protein {ECO:0000313|EMBL:CDO77814.1} OS=Pycnoporus cinnabarinus (Cinnabar-red polypore) PE=4 SV=1	hypothetical protein BN946_scf184722.g6 [Trametes cinnabarina]
EVM0001477.1	--	--	--	--	F-box-like	--	Uncharacterized protein {ECO:0000313|EMBL:EJF58042.1} OS=Dichomitus squalens (strain LYAD-421) PE=4 SV=1	hypothetical protein DICSQDRAFT_163150 [Dichomitus squalens LYAD-421 SS1]
EVM0013151.1	--	--	--	--	--	--	Uncharacterized protein {ECO:0000313|EMBL:CDO73316.1} OS=Pycnoporus cinnabarinus (Cinnabar-red polypore) PE=4 SV=1	hypothetical protein TRAVEDRAFT_72111 [Trametes versicolor FP-101664 SS1]
EVM0007624.1	--	--	--	--	--	--	Uncharacterized protein {ECO:0000313|EMBL:EMD40257.1} (Fragment) OS=Ceriporiopsis subvermispora (strain B) PE=4 SV=1	hypothetical protein CERSUDRAFT_28712, partial [Ceriporiopsis subvermispora B]
EVM0001554.1	--	K18185|5.71358e-54|dsq:DICSQDRAFT_144914|hypothetical protein; K18185 cytochrome c oxidase assembly protein subunit 23 (A)	[S]	Function unknown	CHCH domain	Cytochrome c oxidase-assembly factor COX23, mitochondrial (Precursor) GN=COX23 OS=Cryptococcus neoformans var. neoformans serotype D (strain JEC21 / PE=3 SV=1	Cytochrome c oxidase-assembly factor cox23 {ECO:0000313|EMBL:ESK94886.1} OS=Moniliophthora roreri (strain MCA 2997) PE=4 SV=1	hypothetical protein DICSQDRAFT_144914 [Dichomitus squalens LYAD-421 SS1]
EVM0000851.1	--	--	[R]	General function prediction only	gag-polypeptide of LTR copia-type	--	Uncharacterized protein {ECO:0000313|EMBL:CDO78278.1} (Fragment) OS=Pycnoporus cinnabarinus (Cinnabar-red polypore) PE=4 SV=1	hypothetical protein BN946_scf184660.g5, partial [Trametes cinnabarina]
EVM0000373.1	Biological Process: lipid biosynthetic process (GO:0008610);	K00574|0|psq:PUNSTDRAFT_126253|cyclopropane fatty acid synthase; K00574 cyclopropane-fatty-acyl-phospholipid synthase [EC:2.1.1.79] (A)	--	--	Mycolic acid cyclopropane synthetase	--	Putative cyclopropane fatty acid synthase {ECO:0000313|EMBL:EGO26057.1} OS=Serpula lacrymans var. lacrymans (strain S7.9) PE=4 SV=1	cyclopropane fatty acid synthase [Punctularia strigosozonata HHB-11173 SS5]
EVM0011912.1	--	--	--	--	--	--	Uncharacterized protein {ECO:0000313|EMBL:EJF55318.1} OS=Dichomitus squalens (strain LYAD-421) PE=4 SV=1	hypothetical protein DICSQDRAFT_176091 [Dichomitus squalens LYAD-421 SS1]
EVM0002144.1	--	K01918|0|dsq:DICSQDRAFT_157481|Pantoate-beta-alanine ligase; K01918 pantoate--beta-alanine ligase [EC:6.3.2.1] (A)	[H]	Coenzyme transport and metabolism	Pantoate-beta-alanine ligase	Pantoate--beta-alanine ligase GN=PAN6 OS=Saccharomyces cerevisiae (strain ATCC 204508 / S288c) PE=1 SV=2	Pantoate-beta-alanine ligase {ECO:0000313|EMBL:EJF57207.1} OS=Dichomitus squalens (strain LYAD-421) PE=3 SV=1	Pantoate-beta-alanine ligase [Dichomitus squalens LYAD-421 SS1]
EVM0004806.1	--	K12765|0|dsq:DICSQDRAFT_176501|Pkinase-domain-containing protein; K12765 meiosis induction protein kinase IME2/SME1 [EC:2.7.11.1] (A)	[T]	Signal transduction mechanisms	Protein kinase domain	Sporulation protein kinase pit1 GN=pit1 OS=Schizosaccharomyces pombe (strain 972 / ATCC 24843) PE=1 SV=1	Uncharacterized protein {ECO:0000313|EMBL:CDO71584.1} OS=Pycnoporus cinnabarinus (Cinnabar-red polypore) PE=4 SV=1	Pkinase-domain-containing protein [Dichomitus squalens LYAD-421 SS1]
EVM0008741.1	--	--	--	--	JmjC domain, hydroxylase	Protein PNS1 GN=PNS1 OS=Ashbya gossypii (strain ATCC 10895 / CBS 109.51 / FGSC 9923 / NRRL PE=3 SV=1	Uncharacterized protein {ECO:0000313|EMBL:EMD37724.1} OS=Ceriporiopsis subvermispora (strain B) PE=4 SV=1	hypothetical protein DICSQDRAFT_50077 [Dichomitus squalens LYAD-421 SS1]
EVM0008303.1	Cellular Component: nucleus (GO:0005634); Biological Process: cell cycle (GO:0007049); Molecular Function: zinc ion binding (GO:0008270);	K10842|0|dsq:DICSQDRAFT_131932|CDK-activating kinase assembly factor; K10842 CDK-activating kinase assembly factor MAT1 (A)	[O]	Posttranslational modification, protein turnover, chaperones	CDK-activating kinase assembly factor MAT1	RNA polymerase II transcription factor B subunit 3 GN=TFB3 OS=Debaryomyces hansenii (strain ATCC 36239 / CBS 767 / JCM 1990 / NBRC PE=3 SV=2	Uncharacterized protein {ECO:0000313|EMBL:EPT05934.1} OS=Fomitopsis pinicola (strain FP-58527) PE=4 SV=1	CDK-activating kinase assembly factor [Dichomitus squalens LYAD-421 SS1]
EVM0005619.1	--	--	[BT]	--	Cupin-like domain	--	Uncharacterized protein {ECO:0000313|EMBL:CDO68874.1} OS=Pycnoporus cinnabarinus (Cinnabar-red polypore) PE=4 SV=1	Clavaminate synthase-like protein [Dichomitus squalens LYAD-421 SS1]
EVM0002201.1	--	--	--	--	Clathrin light chain	--	Clathrin light chain {ECO:0000313|EMBL:EJF60749.1} OS=Dichomitus squalens (strain LYAD-421) PE=4 SV=1	clathrin light chain [Dichomitus squalens LYAD-421 SS1]
EVM0007795.1	Molecular Function: alpha-mannosidase activity (GO:0004559); Biological Process: mannose metabolic process (GO:0006013); Molecular Function: zinc ion binding (GO:0008270); Molecular Function: carbohydrate binding (GO:0030246);	K01191|0|dsq:DICSQDRAFT_90032|glycoside hydrolase family 38 protein; K01191 alpha-mannosidase [EC:3.2.1.24] (A)	[G]	Carbohydrate transport and metabolism	Glycosyl hydrolases family 38 N-terminal domain	Alpha-mannosidase GN=ams1 OS=Schizosaccharomyces pombe (strain 972 / ATCC 24843) PE=3 SV=1	Alpha-mannosidase {ECO:0000256|RuleBase:RU361199} OS=Dichomitus squalens (strain LYAD-421) PE=3 SV=1	glycoside hydrolase family 38 protein [Dichomitus squalens LYAD-421 SS1]
EVM0007073.1	--	--	--	--	--	--	Uncharacterized protein {ECO:0000313|EMBL:EIW51897.1} OS=Trametes versicolor (strain FP-101664) PE=4 SV=1	hypothetical protein M413DRAFT_14653 [Hebeloma cylindrosporum h7]
EVM0005065.1	--	--	--	--	--	--	Uncharacterized protein {ECO:0000313|EMBL:EJF57267.1} OS=Dichomitus squalens (strain LYAD-421) PE=4 SV=1	hypothetical protein DICSQDRAFT_163491 [Dichomitus squalens LYAD-421 SS1]
EVM0012463.1	--	--	--	--	--	--	Uncharacterized protein {ECO:0000313|EMBL:EJF55692.1} OS=Dichomitus squalens (strain LYAD-421) PE=4 SV=1	hypothetical protein DICSQDRAFT_184240 [Dichomitus squalens LYAD-421 SS1]
EVM0005323.1	--	--	--	--	--	--	Uncharacterized protein {ECO:0000313|EMBL:EJF60247.1} OS=Dichomitus squalens (strain LYAD-421) PE=4 SV=1	hypothetical protein TRAVEDRAFT_127290 [Trametes versicolor FP-101664 SS1]
EVM0004122.2	--	--	--	--	--	--	Uncharacterized protein {ECO:0000313|EMBL:EJF59377.1} OS=Dichomitus squalens (strain LYAD-421) PE=4 SV=1	hypothetical protein DICSQDRAFT_172168 [Dichomitus squalens LYAD-421 SS1]
EVM0008843.2	Cellular Component: endoplasmic reticulum membrane (GO:0005789); Biological Process: GPI anchor biosynthetic process (GO:0006506); Cellular Component: integral component of membrane (GO:0016021); Biological Process: cell division (GO:0051301);	K05293|0|dsq:DICSQDRAFT_181053|PIG-U-domain-containing protein; K05293 phosphatidylinositol glycan, class U (A)	[R]	General function prediction only	GPI transamidase subunit PIG-U	GPI transamidase component GAB1 GN=L9122.2 OS=Saccharomyces cerevisiae (strain ATCC 204508 / S288c) PE=1 SV=1	PIG-U-domain-containing protein {ECO:0000313|EMBL:EJF61100.1} OS=Dichomitus squalens (strain LYAD-421) PE=4 SV=1	PIG-U-domain-containing protein [Dichomitus squalens LYAD-421 SS1]
EVM0011505.1	--	K15075|0|dsq:DICSQDRAFT_148678|ARM repeat-containing protein; K15075 DNA repair/transcription protein MET18/MMS19 (A)	[LK]	--	Dos2-interacting transcription regulator of RNA-Pol-II	DNA repair/transcription protein mms19 GN=mms19 OS=Schizosaccharomyces pombe (strain 972 / ATCC 24843) PE=3 SV=1	ARM repeat-containing protein {ECO:0000313|EMBL:EJF59029.1} OS=Dichomitus squalens (strain LYAD-421) PE=4 SV=1	ARM repeat-containing protein [Dichomitus squalens LYAD-421 SS1]
EVM0008004.1	Molecular Function: hydrolase activity (GO:0016787);	--	[I]	Lipid transport and metabolism	Phospholipase/Carboxylesterase	Uncharacterized hydrolase UM10204 GN=UM10204 OS=Ustilago maydis (strain 521 / FGSC 9021) PE=3 SV=1	Uncharacterized protein {ECO:0000313|EMBL:EJF60353.1} OS=Dichomitus squalens (strain LYAD-421) PE=4 SV=1	hypothetical protein DICSQDRAFT_147998 [Dichomitus squalens LYAD-421 SS1]
EVM0003978.1	Molecular Function: binding (GO:0005488); Molecular Function: oxidoreductase activity (GO:0016491);	--	[Q]	Secondary metabolites biosynthesis, transport and catabolism	Cytochrome P450	Cytochrome P450 52A1 GN=CYP52A1 OS=Candida tropicalis (Yeast) PE=1 SV=3	Cytochrome P450 {ECO:0000313|EMBL:EJF58010.1} OS=Dichomitus squalens (strain LYAD-421) PE=3 SV=1	cytochrome P450 [Dichomitus squalens LYAD-421 SS1]
EVM0004129.1	--	K00670|0|dsq:DICSQDRAFT_145365|N-terminal acetyltransferase A, auxiliary subunit; K00670 peptide alpha-N-acetyltransferase [EC:2.3.1.88] (A)	[B]	Chromatin structure and dynamics	NMDA receptor-regulated protein 1	N-terminal acetyltransferase A complex subunit nat1 GN=nat1 OS=Schizosaccharomyces pombe (strain 972 / ATCC 24843) PE=1 SV=1	Uncharacterized protein {ECO:0000313|EMBL:CDO77958.1} OS=Pycnoporus cinnabarinus (Cinnabar-red polypore) PE=4 SV=1	N-terminal acetyltransferase A, auxiliary subunit [Dichomitus squalens LYAD-421 SS1]
EVM0000989.1	--	--	--	--	--	--	Uncharacterized protein {ECO:0000313|EMBL:CDO78164.1} OS=Pycnoporus cinnabarinus (Cinnabar-red polypore) PE=4 SV=1	hypothetical protein DICSQDRAFT_51829 [Dichomitus squalens LYAD-421 SS1]
EVM0004865.1	Molecular Function: metalloendopeptidase activity (GO:0004222); Biological Process: proteolysis (GO:0006508); Cellular Component: membrane (GO:0016020); Biological Process: CAAX-box protein processing (GO:0071586);	K06013|0|dsq:DICSQDRAFT_180370|hypothetical protein; K06013 STE24 endopeptidase [EC:3.4.24.84] (A)	[R]	General function prediction only	Peptidase family M48	CAAX prenyl protease 1 GN=STE24 OS=Saccharomyces cerevisiae (strain ATCC 204508 / S288c) PE=1 SV=1	Uncharacterized protein {ECO:0000313|EMBL:EJF62033.1} OS=Dichomitus squalens (strain LYAD-421) PE=4 SV=1	hypothetical protein DICSQDRAFT_180370 [Dichomitus squalens LYAD-421 SS1]
EVM0003334.1	--	--	--	--	--	--	Uncharacterized protein {ECO:0000313|EMBL:EJF58956.1} OS=Dichomitus squalens (strain LYAD-421) PE=4 SV=1	hypothetical protein DICSQDRAFT_182205 [Dichomitus squalens LYAD-421 SS1]
EVM0007768.1	Molecular Function: sterol binding (GO:0032934);	--	--	--	SCP-2 sterol transfer family	Fatty acid-binding protein GN=SCP2 OS=Yarrowia lipolytica (strain CLIB 122 / E 150) PE=1 SV=4	Uncharacterized protein {ECO:0000313|EMBL:CDO75169.1} OS=Pycnoporus cinnabarinus (Cinnabar-red polypore) PE=4 SV=1	sterol-binding-like protein [Dichomitus squalens LYAD-421 SS1]
EVM0013060.1	--	--	--	--	--	--	Uncharacterized protein {ECO:0000313|EMBL:CDO69387.1} OS=Pycnoporus cinnabarinus (Cinnabar-red polypore) PE=4 SV=1	hypothetical protein DICSQDRAFT_168974 [Dichomitus squalens LYAD-421 SS1]
EVM0001542.1	--	--	--	--	--	--	Uncharacterized protein {ECO:0000313|EMBL:EMD37548.1} OS=Ceriporiopsis subvermispora (strain B) PE=4 SV=1	hypothetical protein CERSUDRAFT_94550 [Ceriporiopsis subvermispora B]
EVM0010242.1	--	--	--	--	--	--	Uncharacterized protein {ECO:0000313|EMBL:EPS96917.1} (Fragment) OS=Fomitopsis pinicola (strain FP-58527) PE=4 SV=1	hypothetical protein FOMPIDRAFT_1129521, partial [Fomitopsis pinicola FP-58527 SS1]
EVM0012465.1	Molecular Function: transcription factor activity, sequence-specific DNA binding (GO:0003700); Biological Process: regulation of transcription, DNA-templated (GO:0006355); Cellular Component: CCAAT-binding factor complex (GO:0016602); Molecular Function: sequence-specific DNA binding (GO:0043565); Molecular Function: protein heterodimerization activity (GO:0046982);	--	[K]	Transcription	Histone-like transcription factor (CBF/NF-Y) and archaeal histone	Transcriptional activator HAP5 GN=HAP5 OS=Saccharomyces cerevisiae (strain ATCC 204508 / S288c) PE=1 SV=1	Histone-fold-containing protein {ECO:0000313|EMBL:EJF60008.1} OS=Dichomitus squalens (strain LYAD-421) PE=4 SV=1	histone-fold-containing protein [Dichomitus squalens LYAD-421 SS1]
EVM0001932.1	--	--	--	--	--	--	Uncharacterized protein {ECO:0000313|EMBL:CDO68865.1} OS=Pycnoporus cinnabarinus (Cinnabar-red polypore) PE=4 SV=1	hypothetical protein TRAVEDRAFT_19366 [Trametes versicolor FP-101664 SS1]
EVM0011730.1	--	--	--	--	--	--	Uncharacterized protein {ECO:0000313|EMBL:EJF57978.1} OS=Dichomitus squalens (strain LYAD-421) PE=4 SV=1	hypothetical protein DICSQDRAFT_68006 [Dichomitus squalens LYAD-421 SS1]
EVM0008008.1	--	--	--	--	--	--	Uncharacterized protein {ECO:0000313|EMBL:EJF57037.1} (Fragment) OS=Dichomitus squalens (strain LYAD-421) PE=4 SV=1	hypothetical protein DICSQDRAFT_133371 [Dichomitus squalens LYAD-421 SS1]
EVM0000042.1	--	--	--	--	--	--	Uncharacterized protein {ECO:0000313|EMBL:CDO68789.1} OS=Pycnoporus cinnabarinus (Cinnabar-red polypore) PE=4 SV=1	hypothetical protein DICSQDRAFT_131762 [Dichomitus squalens LYAD-421 SS1]
EVM0006588.1	Molecular Function: hydrolase activity, hydrolyzing O-glycosyl compounds (GO:0004553); Cellular Component: extracellular region (GO:0005576); Biological Process: carbohydrate metabolic process (GO:0005975); Molecular Function: cellulose binding (GO:0030248);	K18578|0|dsq:DICSQDRAFT_130877|Oligoxyloglucan reducing end-specific cellobiohydrolase; K18578 xyloglucan-specific exo-beta-1,4-glucanase [EC:3.2.1.155] (A)	--	--	Fungal cellulose binding domain	Xyloglucanase {ECO:0000303|PubMed:15541296} (Precursor) OS=Hypocrea jecorina (strain QM6a) PE=1 SV=1	Glycoside Hydrolase Family 74 / Carbohydrate-Binding Module Family 1 protein {ECO:0000313|EMBL:CDO72307.1} OS=Pycnoporus cinnabarinus (Cinnabar-red polypore) PE=4 SV=1	hypothetical protein TRAVEDRAFT_55584 [Trametes versicolor FP-101664 SS1]
EVM0008361.1	--	--	--	--	--	--	Uncharacterized protein {ECO:0000313|EMBL:EPQ51994.1} OS=Gloeophyllum trabeum (strain ATCC 11539 / FP-39264 / Madison 617) PE=4 SV=1	hypothetical protein GLOTRDRAFT_140473 [Gloeophyllum trabeum ATCC 11539]
EVM0002859.1	--	--	--	--	--	--	Uncharacterized protein {ECO:0000313|EMBL:EJF60290.1} OS=Dichomitus squalens (strain LYAD-421) PE=4 SV=1	hypothetical protein TRAVEDRAFT_99981, partial [Trametes versicolor FP-101664 SS1]
EVM0010718.1	--	--	[R]	General function prediction only	Integrase core domain	Reverse transcriptase/ribonuclease H GN=J0780 OS=Saccharomyces cerevisiae (strain ATCC 204508 / S288c) PE=3 SV=3	Uncharacterized protein {ECO:0000313|EMBL:CDO74279.1} OS=Pycnoporus cinnabarinus (Cinnabar-red polypore) PE=4 SV=1	hypothetical protein BN946_scf184653.g3 [Trametes cinnabarina]
EVM0001408.1	--	--	--	--	--	--	Uncharacterized protein {ECO:0000313|EMBL:CDO69846.1} OS=Pycnoporus cinnabarinus (Cinnabar-red polypore) PE=4 SV=1	hypothetical protein TRAVEDRAFT_46569 [Trametes versicolor FP-101664 SS1]
EVM0010147.1	--	--	--	--	Alpha/beta hydrolase family	--	Uncharacterized protein {ECO:0000313|EMBL:EMD34962.1} OS=Ceriporiopsis subvermispora (strain B) PE=4 SV=1	proline iminopeptidase [Dichomitus squalens LYAD-421 SS1]
EVM0011605.1	--	--	[V]	Defense mechanisms	alpha/beta hydrolase fold	AB hydrolase superfamily protein B1A11.02 GN=SPAPB1A11.02 OS=Schizosaccharomyces pombe (strain 972 / ATCC 24843) PE=3 SV=1	Uncharacterized protein {ECO:0000313|EMBL:EJF61943.1} OS=Dichomitus squalens (strain LYAD-421) PE=4 SV=1	hypothetical protein DICSQDRAFT_105059 [Dichomitus squalens LYAD-421 SS1]
EVM0010246.1	--	--	[S]	Function unknown	NUDIX domain	--	Uncharacterized protein {ECO:0000313|EMBL:CDO73591.1} OS=Pycnoporus cinnabarinus (Cinnabar-red polypore) PE=4 SV=1	hypothetical protein DICSQDRAFT_132280 [Dichomitus squalens LYAD-421 SS1]
EVM0004353.1	Cellular Component: nucleus (GO:0005634);	K13119|0|dsq:DICSQDRAFT_50116|XAP5-domain-containing protein; K13119 protein FAM50 (A)	[S]	Function unknown	XAP5, circadian clock regulator	FAM50 family protein C1020.12c GN=xap5 OS=Schizosaccharomyces pombe (strain 972 / ATCC 24843) PE=3 SV=2	Uncharacterized protein {ECO:0000313|EMBL:EKM55147.1} OS=Phanerochaete carnosa (strain HHB-10118-sp) PE=4 SV=1	XAP5-domain-containing protein [Dichomitus squalens LYAD-421 SS1]
EVM0001984.1	--	--	--	--	Sucrase/ferredoxin-like	Altered inheritance of mitochondria protein 32 GN=AIM32 OS=Meyerozyma guilliermondii (strain ATCC 6260 / CBS 566 / DSM 6381 / JCM PE=3 SV=2	Uncharacterized protein {ECO:0000313|EMBL:CDO74769.1} OS=Pycnoporus cinnabarinus (Cinnabar-red polypore) PE=4 SV=1	hypothetical protein TRAVEDRAFT_129292 [Trametes versicolor FP-101664 SS1]
EVM0008867.1	--	--	[GO]	--	Domain of unknown function (DUF1996)	Putative fungistatic metabolite GN=CHGG_05463 OS=Chaetomium globosum (strain ATCC 6205 / CBS 148.51 / DSM 1962 / NBRC PE=1 SV=2	WSC-domain-containing protein {ECO:0000313|EMBL:EJF58372.1} OS=Dichomitus squalens (strain LYAD-421) PE=4 SV=1	WSC-domain-containing protein [Dichomitus squalens LYAD-421 SS1]
EVM0002967.1	--	--	--	--	--	--	Uncharacterized protein {ECO:0000313|EMBL:EJF55598.1} OS=Dichomitus squalens (strain LYAD-421) PE=4 SV=1	hypothetical protein DICSQDRAFT_73383 [Dichomitus squalens LYAD-421 SS1]
EVM0003440.1	--	K13628|1.18398e-88|pco:PHACADRAFT_246245|hypothetical protein; K13628 iron-sulfur cluster assembly protein (A)	[P]	Inorganic ion transport and metabolism	Iron-sulphur cluster biosynthesis	Iron-sulfur assembly protein 1 GN=ISA1 OS=Saccharomyces cerevisiae (strain ATCC 204508 / S288c) PE=1 SV=1	Uncharacterized protein {ECO:0000313|EMBL:CDO74775.1} OS=Pycnoporus cinnabarinus (Cinnabar-red polypore) PE=4 SV=1	hypothetical protein BN946_scf185001.g23 [Trametes cinnabarina]
EVM0011133.1	--	--	[TI]	--	Transmembrane adaptor Erv26	Protein SVP26 GN=SVP26 OS=Saccharomyces cerevisiae (strain ATCC 204508 / S288c) PE=1 SV=1	Uncharacterized protein {ECO:0000313|EMBL:EJF56617.1} OS=Dichomitus squalens (strain LYAD-421) PE=4 SV=1	hypothetical protein DICSQDRAFT_157844 [Dichomitus squalens LYAD-421 SS1]
EVM0012992.1	--	--	--	--	Domain of unknown function (DUF3506)	--	Uncharacterized protein {ECO:0000313|EMBL:EIW51796.1} OS=Trametes versicolor (strain FP-101664) PE=4 SV=1	hypothetical protein TRAVEDRAFT_175976 [Trametes versicolor FP-101664 SS1]
EVM0012107.1	Cellular Component: nucleus (GO:0005634);	K11339|0|dsq:DICSQDRAFT_92969|MRG-domain-containing protein; K11339 mortality factor 4-like protein 1 (A)	[BK]	--	MRG	Chromatin modification-related protein EAF3 GN=EAF3 OS=Cryptococcus neoformans var. neoformans serotype D (strain JEC21 / PE=3 SV=1	MRG-domain-containing protein {ECO:0000313|EMBL:EJF56966.1} OS=Dichomitus squalens (strain LYAD-421) PE=4 SV=1	MRG-domain-containing protein [Dichomitus squalens LYAD-421 SS1]
EVM0005259.1	Biological Process: amino acid transmembrane transport (GO:0003333); Molecular Function: amino acid transmembrane transporter activity (GO:0015171); Cellular Component: integral component of membrane (GO:0016021);	--	[E]	Amino acid transport and metabolism	Amino acid permease	Amino-acid permease inda1 GN=inda1 OS=Hypocrea atroviridis (Trichoderma atroviride) PE=2 SV=1	Uncharacterized protein {ECO:0000313|EMBL:EJF62145.1} OS=Dichomitus squalens (strain LYAD-421) PE=4 SV=1	hypothetical protein DICSQDRAFT_58932 [Dichomitus squalens LYAD-421 SS1]
EVM0010838.1	Molecular Function: organic cyclic compound binding (GO:0097159); Molecular Function: heterocyclic compound binding (GO:1901363);	K12881|6.74375e-99|dsq:DICSQDRAFT_88921|hypothetical protein; K12881 THO complex subunit 4 (A)	[A]	RNA processing and modification	RNA recognition motif. (a.k.a. RRM, RBD, or RNP domain)	mRNA export protein mlo3 GN=mlo3 OS=Schizosaccharomyces pombe (strain 972 / ATCC 24843) PE=1 SV=1	Uncharacterized protein {ECO:0000313|EMBL:EJF59807.1} OS=Dichomitus squalens (strain LYAD-421) PE=4 SV=1	hypothetical protein DICSQDRAFT_88921 [Dichomitus squalens LYAD-421 SS1]
EVM0011945.1	--	--	--	--	--	--	Uncharacterized protein {ECO:0000313|EMBL:CDO74153.1} OS=Pycnoporus cinnabarinus (Cinnabar-red polypore) PE=4 SV=1	hypothetical protein BN946_scf185043.g204 [Trametes cinnabarina]
EVM0008869.1	Molecular Function: binding (GO:0005488); Molecular Function: oxidoreductase activity (GO:0016491);	--	[QI]	--	Cytochrome P450	Cytochrome P450 52A3-B GN=CYP52A3-B OS=Candida maltosa (Yeast) PE=1 SV=1	Cytochrome P450 {ECO:0000313|EMBL:EJF57366.1} OS=Dichomitus squalens (strain LYAD-421) PE=3 SV=1	cytochrome P450 [Dichomitus squalens LYAD-421 SS1]
EVM0010644.1	Molecular Function: catalytic activity (GO:0003824);	--	--	--	Glycosyl hydrolase family 92	--	Glycoside hydrolase family 92 protein {ECO:0000313|EMBL:EJF59982.1} OS=Dichomitus squalens (strain LYAD-421) PE=4 SV=1	glycoside hydrolase family 92 protein [Dichomitus squalens LYAD-421 SS1]
EVM0011169.1	--	K13721|0|dsq:DICSQDRAFT_135524|hypothetical protein; K13721 aminopeptidase 2 [EC:3.4.11.-] (A)	[EO]	--	Peptidase family M1	Aminopeptidase 1 GN=ape1 OS=Schizosaccharomyces pombe (strain 972 / ATCC 24843) PE=3 SV=1	Uncharacterized protein {ECO:0000313|EMBL:CDO74865.1} OS=Pycnoporus cinnabarinus (Cinnabar-red polypore) PE=4 SV=1	hypothetical protein DICSQDRAFT_135524 [Dichomitus squalens LYAD-421 SS1]
EVM0009834.3	--	--	--	--	--	--	Predicted protein {ECO:0000313|EMBL:EED83366.1} OS=Postia placenta (strain ATCC 44394 / Madison 698-R) PE=4 SV=1	hypothetical protein TRAVEDRAFT_74247 [Trametes versicolor FP-101664 SS1]
EVM0007469.1	--	--	--	--	--	--	Uncharacterized protein {ECO:0000313|EMBL:EJF57148.1} OS=Dichomitus squalens (strain LYAD-421) PE=4 SV=1	hypothetical protein DICSQDRAFT_140593 [Dichomitus squalens LYAD-421 SS1]
EVM0003721.1	--	--	--	--	--	--	Uncharacterized protein {ECO:0000313|EMBL:EJF56888.1} OS=Dichomitus squalens (strain LYAD-421) PE=4 SV=1	hypothetical protein DICSQDRAFT_183536 [Dichomitus squalens LYAD-421 SS1]
EVM0013283.1	Biological Process: vesicle-mediated transport (GO:0016192);	--	[P]	Inorganic ion transport and metabolism	Got1/Sft2-like family	Protein transport protein GOT1 GN=GOT1 OS=Saccharomyces cerevisiae (strain ATCC 204508 / S288c) PE=1 SV=1	Uncharacterized protein {ECO:0000313|EMBL:EMD33603.1} OS=Ceriporiopsis subvermispora (strain B) PE=4 SV=1	Got1-domain-containing protein [Dichomitus squalens LYAD-421 SS1]
EVM0000975.2	--	--	[S]	Function unknown	Protein of unknown function (DUF563)	--	Uncharacterized protein {ECO:0000313|EMBL:EJF58222.1} OS=Dichomitus squalens (strain LYAD-421) PE=4 SV=1	hypothetical protein DICSQDRAFT_182702 [Dichomitus squalens LYAD-421 SS1]
EVM0004915.2	--	--	--	--	--	--	Uncharacterized protein {ECO:0000313|EMBL:EMD35867.1} OS=Ceriporiopsis subvermispora (strain B) PE=4 SV=1	hypothetical protein CERSUDRAFT_115786 [Ceriporiopsis subvermispora B]
EVM0007935.2	Molecular Function: binding (GO:0005488);	K14404|6.6966e-154|dsq:DICSQDRAFT_96073|hypothetical protein; K14404 cleavage and polyadenylation specificity factor subunit 4 (A)	[A]	RNA processing and modification	Zinc finger C-x8-C-x5-C-x3-H type (and similar)	mRNA 3&apos;-end-processing protein YTH1 GN=YTH1 OS=Cryptococcus neoformans var. neoformans serotype D (strain JEC21 / PE=3 SV=1	Uncharacterized protein {ECO:0000313|EMBL:EKM61146.1} OS=Phanerochaete carnosa (strain HHB-10118-sp) PE=4 SV=1	hypothetical protein DICSQDRAFT_96073 [Dichomitus squalens LYAD-421 SS1]
EVM0001708.1	--	--	[R]	General function prediction only	Reverse transcriptase (RNA-dependent DNA polymerase)	Transposon Tf2-9 polyprotein GN=Tf2-9 OS=Schizosaccharomyces pombe (strain 972 / ATCC 24843) PE=3 SV=1	Pro-pol protein {ECO:0000313|EMBL:BAF74362.1} (Fragment) OS=Lentinula edodes (Shiitake mushroom) PE=4 SV=1	pro-pol protein [Lentinula edodes]
EVM0008199.1	--	--	--	--	zinc finger of C3HC4-type, RING	--	Uncharacterized protein {ECO:0000313|EMBL:CDO75641.1} OS=Pycnoporus cinnabarinus (Cinnabar-red polypore) PE=4 SV=1	hypothetical protein DICSQDRAFT_78904 [Dichomitus squalens LYAD-421 SS1]
EVM0004824.1	--	K12603|0|dsq:DICSQDRAFT_72793|hypothetical protein; K12603 CCR4-NOT transcription complex subunit 6 [EC:3.1.13.4] (A)	[K]	Transcription	Endonuclease/Exonuclease/phosphatase family	Glucose-repressible alcohol dehydrogenase transcriptional effector GN=CCR4 OS=Ustilago maydis (strain 521 / FGSC 9021) PE=3 SV=1	Uncharacterized protein {ECO:0000313|EMBL:EJF55833.1} OS=Dichomitus squalens (strain LYAD-421) PE=4 SV=1	hypothetical protein DICSQDRAFT_72793 [Dichomitus squalens LYAD-421 SS1]
EVM0008983.1	--	--	--	--	--	--	Uncharacterized protein {ECO:0000313|EMBL:EJF62172.1} OS=Dichomitus squalens (strain LYAD-421) PE=4 SV=1	hypothetical protein DICSQDRAFT_104425 [Dichomitus squalens LYAD-421 SS1]
EVM0011108.1	--	--	--	--	Hsp20/alpha crystallin family	--	Uncharacterized protein {ECO:0000313|EMBL:CDO74963.1} OS=Pycnoporus cinnabarinus (Cinnabar-red polypore) PE=3 SV=1	hypothetical protein TRAVEDRAFT_48510 [Trametes versicolor FP-101664 SS1]
EVM0012344.1	--	--	--	--	--	--	Uncharacterized protein {ECO:0000313|EMBL:EJF58592.1} OS=Dichomitus squalens (strain LYAD-421) PE=4 SV=1	hypothetical protein DICSQDRAFT_90406 [Dichomitus squalens LYAD-421 SS1]
EVM0006128.1	--	--	--	--	DNA-directed RNA polymerase I subunit RPA34.5	--	Uncharacterized protein {ECO:0000313|EMBL:CDO71878.1} OS=Pycnoporus cinnabarinus (Cinnabar-red polypore) PE=4 SV=1	hypothetical protein DICSQDRAFT_169114 [Dichomitus squalens LYAD-421 SS1]
EVM0011892.1	--	--	--	--	--	--	Uncharacterized protein {ECO:0000313|EMBL:CDO74536.1} OS=Pycnoporus cinnabarinus (Cinnabar-red polypore) PE=4 SV=1	hypothetical protein BN946_scf184641.g2 [Trametes cinnabarina]
EVM0005452.1	--	--	[S]	Function unknown	NUC153 domain	Pre-rRNA-processing protein esf1 GN=esf1 OS=Schizosaccharomyces pombe (strain 972 / ATCC 24843) PE=1 SV=1	Uncharacterized protein {ECO:0000313|EMBL:CDO71641.1} OS=Pycnoporus cinnabarinus (Cinnabar-red polypore) PE=4 SV=1	hypothetical protein DICSQDRAFT_131053 [Dichomitus squalens LYAD-421 SS1]
EVM0007521.1	--	K13525|0|dsq:DICSQDRAFT_134067|AAA ATPase; K13525 transitional endoplasmic reticulum ATPase (A)	[O]	Posttranslational modification, protein turnover, chaperones	ATPase family associated with various cellular activities (AAA)	Cell division control protein 48 GN=CDC48 OS=Saccharomyces cerevisiae (strain ATCC 204508 / S288c) PE=1 SV=3	Putative uncharacterized protein {ECO:0000313|EMBL:EFI98034.1} OS=Schizophyllum commune (strain H4-8 / FGSC 9210) PE=3 SV=1	AAA ATPase [Dichomitus squalens LYAD-421 SS1]
EVM0006999.1	--	--	--	--	--	--	Uncharacterized protein {ECO:0000313|EMBL:EJF57436.1} OS=Dichomitus squalens (strain LYAD-421) PE=4 SV=1	hypothetical protein DICSQDRAFT_183223 [Dichomitus squalens LYAD-421 SS1]
EVM0000983.1	--	--	--	--	Nbl1 / Borealin N terminal	--	Uncharacterized protein {ECO:0000313|EMBL:CDO71699.1} OS=Pycnoporus cinnabarinus (Cinnabar-red polypore) PE=4 SV=1	hypothetical protein DICSQDRAFT_56096 [Dichomitus squalens LYAD-421 SS1]
EVM0009804.1	--	--	--	--	--	--	Uncharacterized protein {ECO:0000313|EMBL:EKM58311.1} OS=Phanerochaete carnosa (strain HHB-10118-sp) PE=4 SV=1	hypothetical protein PHACADRAFT_252528 [Phanerochaete carnosa HHB-10118-sp]
EVM0004715.1	Molecular Function: catalytic activity (GO:0003824);	--	--	--	Glycosyl hydrolase family 92	--	Glycoside hydrolase family 92 protein {ECO:0000313|EMBL:EJF58264.1} OS=Dichomitus squalens (strain LYAD-421) PE=4 SV=1	glycoside hydrolase family 92 protein [Dichomitus squalens LYAD-421 SS1]
EVM0012575.1	--	--	--	--	Fungal Zn(2)-Cys(6) binuclear cluster domain	Uncharacterized transcriptional regulatory protein C530.05 GN=SPBC530.05 OS=Schizosaccharomyces pombe (strain 972 / ATCC 24843) PE=3 SV=2	Uncharacterized protein {ECO:0000313|EMBL:EJF57821.1} OS=Dichomitus squalens (strain LYAD-421) PE=4 SV=1	hypothetical protein DICSQDRAFT_182959 [Dichomitus squalens LYAD-421 SS1]
EVM0002469.1	Biological Process: metabolic process (GO:0008152); Molecular Function: oxidoreductase activity (GO:0016491);	--	--	--	Mannitol dehydrogenase C-terminal domain	Mannitol-1-phosphate 5-dehydrogenase GN=mpdA OS=Emericella nidulans (strain FGSC A4 / ATCC 38163 / CBS 112.46 / NRRL PE=3 SV=1	Mannitol-1-phosphate 5-dehydrogenase {ECO:0000313|EMBL:EJF57108.1} OS=Dichomitus squalens (strain LYAD-421) PE=3 SV=1	mannitol-1-phosphate 5-dehydrogenase [Dichomitus squalens LYAD-421 SS1]
EVM0012224.1	--	--	--	--	--	--	Uncharacterized protein {ECO:0000313|EMBL:KDQ25283.1} OS=Pleurotus ostreatus PC15 PE=4 SV=1	hypothetical protein PLEOSDRAFT_1106223 [Pleurotus ostreatus PC15]
EVM0004981.1	--	K17878|4.40516e-100|dsq:DICSQDRAFT_68384|hypothetical protein; K17878 nicotinamide N-methyltransferase [EC:2.1.1.1] (A)	[R]	General function prediction only	Putative methyltransferase	Protein N-methyltransferase NNT1 {ECO:0000250|UniProtKB:Q05874} GN=NNT1 OS=Gibberella zeae (strain PH-1 / ATCC MYA-4620 / FGSC 9075 / NRRL 31084) PE=3 SV=2	Uncharacterized protein {ECO:0000313|EMBL:EJF57799.1} OS=Dichomitus squalens (strain LYAD-421) PE=4 SV=1	hypothetical protein DICSQDRAFT_68384 [Dichomitus squalens LYAD-421 SS1]
EVM0012228.1	--	--	--	--	--	--	Uncharacterized protein {ECO:0000313|EMBL:EJF58903.1} OS=Dichomitus squalens (strain LYAD-421) PE=4 SV=1	hypothetical protein DICSQDRAFT_182271 [Dichomitus squalens LYAD-421 SS1]
EVM0009338.1	--	--	[R]	General function prediction only	GMC oxidoreductase	Pyranose dehydrogenase {ECO:0000303|PubMed:24970179} (Precursor) OS=Agaricus campestris (Field mushroom) PE=1 SV=1	Aryl-alcohol oxidase-like protein {ECO:0000313|EMBL:EJF58133.1} OS=Dichomitus squalens (strain LYAD-421) PE=3 SV=1	aryl-alcohol oxidase-like protein [Dichomitus squalens LYAD-421 SS1]
EVM0003664.1	--	--	--	--	--	--	Predicted protein {ECO:0000313|EMBL:EDR15547.1} OS=Laccaria bicolor (strain S238N-H82 / ATCC MYA-4686) PE=4 SV=1	predicted protein [Laccaria bicolor S238N-H82]
EVM0002172.1	--	--	--	--	--	--	Uncharacterized protein {ECO:0000313|EMBL:EJF60205.1} OS=Dichomitus squalens (strain LYAD-421) PE=4 SV=1	hypothetical protein DICSQDRAFT_171430 [Dichomitus squalens LYAD-421 SS1]
EVM0012320.1	Molecular Function: NAD+ binding (GO:0070403);	K11121|1.13968e-34|psq:PUNSTDRAFT_141389|NAD-dependent deacetylase sirtuin-2; K11121 NAD-dependent histone deacetylase SIR2 [EC:3.5.1.-] (A)	[BK]	--	Sir2 family	NAD-dependent protein deacetylase hst2-1 GN=AN7461 OS=Emericella nidulans (strain FGSC A4 / ATCC 38163 / CBS 112.46 / NRRL PE=3 SV=1	Uncharacterized protein {ECO:0000313|EMBL:EMD39911.1} OS=Ceriporiopsis subvermispora (strain B) PE=4 SV=1	NAD-dependent deacetylase sirtuin-2, partial [Trametes versicolor FP-101664 SS1]
EVM0008830.2	--	K16794|0|dsq:DICSQDRAFT_68482|nuclear distribution protein PAC1; K16794 platelet-activating factor acetylhydrolase IB subunit alpha (A)	[S]	Function unknown	WD domain, G-beta repeat	Nuclear distribution protein PAC1 {ECO:0000255|HAMAP-Rule:MF_03141} OS=Ustilago maydis (strain 521 / FGSC 9021) PE=3 SV=1	Nuclear distribution protein PAC1 {ECO:0000256|HAMAP-Rule:MF_03141} OS=Dichomitus squalens (strain LYAD-421) PE=3 SV=1	nuclear distribution protein PAC1 [Dichomitus squalens LYAD-421 SS1]
EVM0005678.1	--	--	--	--	--	--	Barwin-like endoglucanase {ECO:0000313|EMBL:EJF58907.1} OS=Dichomitus squalens (strain LYAD-421) PE=4 SV=1	barwin-like endoglucanase [Dichomitus squalens LYAD-421 SS1]
EVM0012119.1	--	--	--	--	--	--	Uncharacterized protein {ECO:0000313|EMBL:EJF56354.1} OS=Dichomitus squalens (strain LYAD-421) PE=4 SV=1	hypothetical protein DICSQDRAFT_71665 [Dichomitus squalens LYAD-421 SS1]
EVM0000654.2	Molecular Function: hydrolase activity (GO:0016787);	--	--	--	GDSL-like Lipase/Acylhydrolase	--	GDSL lipase/acylhydrolase {ECO:0000313|EMBL:EJF59313.1} OS=Dichomitus squalens (strain LYAD-421) PE=4 SV=1	GDSL lipase/acylhydrolase [Dichomitus squalens LYAD-421 SS1]
EVM0003573.1	--	--	--	--	Peptidase family M20/M25/M40	--	Amidohydrolase {ECO:0000313|EMBL:EJF61923.1} OS=Dichomitus squalens (strain LYAD-421) PE=4 SV=1	amidohydrolase [Dichomitus squalens LYAD-421 SS1]
EVM0012506.1	Molecular Function: nucleic acid binding (GO:0003676); Molecular Function: zinc ion binding (GO:0008270);	K12848|8.70938e-156|dsq:DICSQDRAFT_143786|hypothetical protein; K12848 U4/U6.U5 tri-snRNP component SNU23 (A)	[R]	General function prediction only	Zinc-finger double-stranded RNA-binding	U4/U6.U5 small nuclear ribonucleoprotein component snu23 GN=snu23 OS=Schizosaccharomyces pombe (strain 972 / ATCC 24843) PE=3 SV=4	Uncharacterized protein {ECO:0000313|EMBL:CCM00061.1} OS=Fibroporia radiculosa (strain TFFH 294) PE=4 SV=1	hypothetical protein DICSQDRAFT_143786 [Dichomitus squalens LYAD-421 SS1]
EVM0008623.1	--	K00652|0|dsq:DICSQDRAFT_182103|PLP-dependent transferase; K00652 8-amino-7-oxononanoate synthase [EC:2.3.1.47] (A)	[E]	Amino acid transport and metabolism	Aminotransferase class I and II	Serine palmitoyltransferase 2 GN=lcb2 OS=Schizosaccharomyces pombe (strain 972 / ATCC 24843) PE=3 SV=1	PLP-dependent transferase {ECO:0000313|EMBL:EJF59162.1} OS=Dichomitus squalens (strain LYAD-421) PE=4 SV=1	PLP-dependent transferase [Dichomitus squalens LYAD-421 SS1]
EVM0002892.1	--	--	--	--	--	--	Uncharacterized protein {ECO:0000313|EMBL:EPS97623.1} OS=Fomitopsis pinicola (strain FP-58527) PE=4 SV=1	hypothetical protein FOMPIDRAFT_1052194 [Fomitopsis pinicola FP-58527 SS1]
EVM0004774.1	--	--	--	--	--	--	Uncharacterized protein {ECO:0000313|EMBL:EJF60248.1} OS=Dichomitus squalens (strain LYAD-421) PE=4 SV=1	hypothetical protein TRAVEDRAFT_151579 [Trametes versicolor FP-101664 SS1]
EVM0004097.2	--	K13113|1.88762e-43|mrr:Moror_17816|ubiquitin-like protein; K13113 ubiquitin-like protein 5 (A)	[O]	Posttranslational modification, protein turnover, chaperones	Ubiquitin family	Ubiquitin-like modifier hub1 GN=hub1 OS=Schizosaccharomyces pombe (strain 972 / ATCC 24843) PE=1 SV=1	Ubiquitin-like protein {ECO:0000313|EMBL:ESK97385.1} OS=Moniliophthora roreri (strain MCA 2997) PE=4 SV=1	ubiquitin-like protein [Moniliophthora roreri MCA 2997]
EVM0009759.1	--	--	--	--	--	--	Uncharacterized protein {ECO:0000313|EMBL:EJF60280.1} OS=Dichomitus squalens (strain LYAD-421) PE=4 SV=1	hypothetical protein DICSQDRAFT_147957 [Dichomitus squalens LYAD-421 SS1]
EVM0010935.1	Biological Process: protein folding (GO:0006457); Cellular Component: prefoldin complex (GO:0016272); Molecular Function: unfolded protein binding (GO:0051082);	K04797|2.74313e-104|dsq:DICSQDRAFT_174932|Prefoldin-domain-containing protein; K04797 prefoldin alpha subunit (A)	[O]	Posttranslational modification, protein turnover, chaperones	Prefoldin subunit	Probable prefoldin subunit 5 GN=bob1 OS=Schizosaccharomyces pombe (strain 972 / ATCC 24843) PE=1 SV=1	Prefoldin-domain-containing protein {ECO:0000313|EMBL:EJF56416.1} OS=Dichomitus squalens (strain LYAD-421) PE=3 SV=1	Prefoldin-domain-containing protein [Dichomitus squalens LYAD-421 SS1]
EVM0012744.3	Molecular Function: peptidase activity (GO:0008233);	--	--	--	--	--	Uncharacterized protein {ECO:0000313|EMBL:EJT97071.1} OS=Dacryopinax sp. (strain DJM 731) PE=4 SV=1	hypothetical protein DACRYDRAFT_25209 [Dacryopinax sp. DJM-731 SS1]
EVM0010178.1	Biological Process: protein peptidyl-prolyl isomerization (GO:0000413); Molecular Function: peptidyl-prolyl cis-trans isomerase activity (GO:0003755); Biological Process: protein folding (GO:0006457);	K10598|0|gtr:GLOTRDRAFT_124368|hypothetical protein; K10598 peptidyl-prolyl cis-trans isomerase-like 2 [EC:5.2.1.8] (A)	[O]	Posttranslational modification, protein turnover, chaperones	Cyclophilin type peptidyl-prolyl cis-trans isomerase/CLD	Peptidyl-prolyl cis-trans isomerase-like 2 {ECO:0000305} GN=CYP8 OS=Cryptococcus neoformans var. neoformans serotype D (strain JEC21 / PE=3 SV=1	Uncharacterized protein {ECO:0000313|EMBL:CDO73515.1} OS=Pycnoporus cinnabarinus (Cinnabar-red polypore) PE=4 SV=1	cyclophilin-like protein [Trametes versicolor FP-101664 SS1]
EVM0005886.1	Molecular Function: kinase activity (GO:0016301);	--	[T]	Signal transduction mechanisms	Protein kinase domain	Negative regulator of sexual conjugation and meiosis GN=ran1 OS=Schizosaccharomyces pombe (strain 972 / ATCC 24843) PE=1 SV=2	Uncharacterized protein {ECO:0000313|EMBL:CDO72454.1} OS=Pycnoporus cinnabarinus (Cinnabar-red polypore) PE=4 SV=1	kinase-like protein, partial [Dichomitus squalens LYAD-421 SS1]
EVM0000614.1	--	--	--	--	--	--	Uncharacterized protein {ECO:0000313|EMBL:CDO74731.1} OS=Pycnoporus cinnabarinus (Cinnabar-red polypore) PE=4 SV=1	hypothetical protein DICSQDRAFT_77263 [Dichomitus squalens LYAD-421 SS1]
EVM0000819.1	--	--	--	--	--	--	Cytochrome P450 {ECO:0000313|EMBL:EJF59591.1} OS=Dichomitus squalens (strain LYAD-421) PE=4 SV=1	cytochrome P450 [Dichomitus squalens LYAD-421 SS1]
EVM0003982.1	--	--	--	--	--	--	Uncharacterized protein {ECO:0000313|EMBL:CDO71064.1} OS=Pycnoporus cinnabarinus (Cinnabar-red polypore) PE=4 SV=1	hypothetical protein BN946_scf184844.g68 [Trametes cinnabarina]
EVM0006412.1	--	--	--	--	Mitochondrial ribosomal protein subunit	--	Uncharacterized protein {ECO:0000313|EMBL:CDO73658.1} OS=Pycnoporus cinnabarinus (Cinnabar-red polypore) PE=4 SV=1	hypothetical protein DICSQDRAFT_132337 [Dichomitus squalens LYAD-421 SS1]
EVM0012666.1	Molecular Function: oxidoreductase activity (GO:0016491); Biological Process: single-organism metabolic process (GO:0044710); Molecular Function: metal ion binding (GO:0046872);	--	[Q]	Secondary metabolites biosynthesis, transport and catabolism	Multicopper oxidase	Laccase-4 (Precursor) GN=LCC4 OS=Trametes versicolor (White-rot fungus) PE=3 SV=1	Laccase {ECO:0000313|EMBL:AHA83592.1} (Fragment) OS=Ganoderma lucidum (Ling zhi medicinal fungus) PE=4 SV=1	laccase, partial [Ganoderma lucidum]
EVM0009937.1	--	--	--	--	--	--	Uncharacterized protein {ECO:0000313|EMBL:CDO74131.1} OS=Pycnoporus cinnabarinus (Cinnabar-red polypore) PE=4 SV=1	hypothetical protein DICSQDRAFT_103540 [Dichomitus squalens LYAD-421 SS1]
EVM0002330.1	Molecular Function: ATP binding (GO:0005524); Cellular Component: nucleus (GO:0005634); Biological Process: obsolete ATP catabolic process (GO:0006200); Molecular Function: ATPase activity (GO:0016887);	K03235|0|dsq:DICSQDRAFT_98992|hypothetical protein; K03235 elongation factor 3 (A)	[EJ]	--	ABC transporter	mRNA export factor elf1 GN=elf1 OS=Schizosaccharomyces pombe (strain 972 / ATCC 24843) PE=1 SV=1	Uncharacterized protein {ECO:0000313|EMBL:CDO72527.1} OS=Pycnoporus cinnabarinus (Cinnabar-red polypore) PE=3 SV=1	hypothetical protein DICSQDRAFT_98992 [Dichomitus squalens LYAD-421 SS1]
EVM0003379.1	Molecular Function: electron carrier activity (GO:0009055); Molecular Function: protein disulfide oxidoreductase activity (GO:0015035); Biological Process: cell redox homeostasis (GO:0045454);	--	[O]	Posttranslational modification, protein turnover, chaperones	Thioredoxin	Monothiol glutaredoxin-4 GN=grx4 OS=Schizosaccharomyces pombe (strain 972 / ATCC 24843) PE=1 SV=1	Glutaredoxin {ECO:0000313|EMBL:EJF59136.1} OS=Dichomitus squalens (strain LYAD-421) PE=4 SV=1	glutaredoxin [Dichomitus squalens LYAD-421 SS1]
EVM0001526.1	--	K03124|1.99678e-116|dsq:DICSQDRAFT_92561|hypothetical protein; K03124 transcription initiation factor TFIIB (A)	[K]	Transcription	Transcription factor TFIIB repeat	Transcription initiation factor IIB GN=sua7 OS=Schizosaccharomyces pombe (strain 972 / ATCC 24843) PE=3 SV=1	Uncharacterized protein {ECO:0000313|EMBL:EJF57224.1} OS=Dichomitus squalens (strain LYAD-421) PE=4 SV=1	hypothetical protein DICSQDRAFT_92561 [Dichomitus squalens LYAD-421 SS1]
EVM0005897.1	--	--	--	--	MULE transposase domain	--	Predicted protein {ECO:0000313|EMBL:EED78067.1} OS=Postia placenta (strain ATCC 44394 / Madison 698-R) PE=4 SV=1	hypothetical protein TRAVEDRAFT_97696, partial [Trametes versicolor FP-101664 SS1]
EVM0004394.1	--	--	[T]	Signal transduction mechanisms	OPT oligopeptide transporter protein	Glutathione transporter 1 GN=pgt1 OS=Schizosaccharomyces pombe (strain 972 / ATCC 24843) PE=1 SV=1	Uncharacterized protein {ECO:0000313|EMBL:CDO75882.1} OS=Pycnoporus cinnabarinus (Cinnabar-red polypore) PE=4 SV=1	OPT oligopeptide transporter [Dichomitus squalens LYAD-421 SS1]
EVM0009116.1	--	--	--	--	--	--	Uncharacterized protein {ECO:0000313|EMBL:CDO76636.1} OS=Pycnoporus cinnabarinus (Cinnabar-red polypore) PE=4 SV=1	hypothetical protein DICSQDRAFT_38992, partial [Dichomitus squalens LYAD-421 SS1]
EVM0006229.1	--	--	--	--	--	--	Uncharacterized protein {ECO:0000313|EMBL:CDO72954.1} OS=Pycnoporus cinnabarinus (Cinnabar-red polypore) PE=4 SV=1	hypothetical protein DICSQDRAFT_176610 [Dichomitus squalens LYAD-421 SS1]
EVM0008017.2	--	--	[D]	Cell cycle control, cell division, chromosome partitioning	Fes/CIP4, and EFC/F-BAR homology domain	Cell division control protein 15 GN=cdc15 OS=Schizosaccharomyces pombe (strain 972 / ATCC 24843) PE=1 SV=2	Uncharacterized protein {ECO:0000313|EMBL:EJF60736.1} OS=Dichomitus squalens (strain LYAD-421) PE=4 SV=1	hypothetical protein DICSQDRAFT_87573 [Dichomitus squalens LYAD-421 SS1]
EVM0004611.1	Molecular Function: binding (GO:0005488); Cellular Component: intracellular organelle (GO:0043229);	K10402|0|dsq:DICSQDRAFT_123093|kinesin-domain-containing protein; K10402 kinesin family member 20 (A)	[Z]	Cytoskeleton	Kinesin motor domain	Kinesin-like motor protein 9 GN=klp9 OS=Schizosaccharomyces pombe (strain 972 / ATCC 24843) PE=1 SV=2	Kinesin-like protein {ECO:0000256|RuleBase:RU000394} OS=Pycnoporus cinnabarinus (Cinnabar-red polypore) PE=3 SV=1	kinesin-domain-containing protein [Dichomitus squalens LYAD-421 SS1]
EVM0000544.3	Cellular Component: membrane (GO:0016020); Biological Process: single-organism metabolic process (GO:0044710);	K00227|9.48411e-132|dsq:DICSQDRAFT_166781|hypothetical protein; K00227 lathosterol oxidase [EC:1.14.21.6] (A)	[I]	Lipid transport and metabolism	Fatty acid hydroxylase superfamily	C-5 sterol desaturase GN=ERG3 OS=Leptosphaeria maculans (Blackleg fungus) PE=3 SV=1	Uncharacterized protein {ECO:0000313|EMBL:CDO75791.1} OS=Pycnoporus cinnabarinus (Cinnabar-red polypore) PE=4 SV=1	hypothetical protein DICSQDRAFT_166781 [Dichomitus squalens LYAD-421 SS1]
EVM0010996.1	--	K11699|0|dsq:DICSQDRAFT_63701|RdRP-domain-containing protein; K11699 RNA-dependent RNA polymerase [EC:2.7.7.48] (A)	[A]	RNA processing and modification	RNA dependent RNA polymerase	RNA-dependent RNA polymerase 1 GN=rdr1 OS=Schizosaccharomyces pombe (strain 972 / ATCC 24843) PE=1 SV=1	RdRP-domain-containing protein {ECO:0000313|EMBL:EJF60041.1} OS=Dichomitus squalens (strain LYAD-421) PE=4 SV=1	RdRP-domain-containing protein [Dichomitus squalens LYAD-421 SS1]
EVM0011093.1	--	K00418|6.37831e-47|dsq:DICSQDRAFT_146974|hypothetical protein; K00418 ubiquinol-cytochrome c reductase subunit 8 (A)	[C]	Energy production and conversion	UcrQ family	Cytochrome b-c1 complex subunit 8 GN=qcr8 OS=Schizosaccharomyces pombe (strain 972 / ATCC 24843) PE=3 SV=1	Uncharacterized protein {ECO:0000313|EMBL:CDO75090.1} OS=Pycnoporus cinnabarinus (Cinnabar-red polypore) PE=4 SV=1	hypothetical protein TRAVEDRAFT_174352 [Trametes versicolor FP-101664 SS1]
EVM0009803.1	Biological Process: formation of translation preinitiation complex (GO:0001731); Molecular Function: translation initiation factor activity (GO:0003743); Cellular Component: eukaryotic translation initiation factor 3 complex (GO:0005852); Biological Process: regulation of translational initiation (GO:0006446); Cellular Component: eukaryotic 43S preinitiation complex (GO:0016282); Cellular Compone…	K15028|8.02474e-164|dsq:DICSQDRAFT_95194|initiation factor 3; K15028 translation initiation factor 3 subunit K (A)	[S]	Function unknown	SAC3/GANP/Nin1/mts3/eIF-3 p25 family	Eukaryotic translation initiation factor 3 subunit K {ECO:0000255|HAMAP-Rule:MF_03010} GN=UM04837 OS=Ustilago maydis (strain 521 / FGSC 9021) PE=3 SV=2	Eukaryotic translation initiation factor 3 subunit K {ECO:0000256|HAMAP-Rule:MF_03010} OS=Pycnoporus cinnabarinus (Cinnabar-red polypore) PE=3 SV=1	initiation factor 3 [Dichomitus squalens LYAD-421 SS1]
EVM0006096.1	--	--	[R]	General function prediction only	--	Midasin OS=Saccharomyces cerevisiae (strain ATCC 204508 / S288c) PE=1 SV=1	Uncharacterized protein {ECO:0000313|EMBL:EJF57562.1} OS=Dichomitus squalens (strain LYAD-421) PE=4 SV=1	hypothetical protein DICSQDRAFT_157273 [Dichomitus squalens LYAD-421 SS1]
EVM0009327.1	--	--	[C]	Energy production and conversion	WD domain, G-beta repeat	ATP synthase subunit delta, mitochondrial (Precursor) GN=atpD OS=Agaricus bisporus (White button mushroom) PE=2 SV=1	Uncharacterized protein {ECO:0000313|EMBL:CDO69228.1} OS=Pycnoporus cinnabarinus (Cinnabar-red polypore) PE=3 SV=1	hypothetical protein TRAVEDRAFT_43851 [Trametes versicolor FP-101664 SS1]
EVM0004753.1	--	--	--	--	DDE superfamily endonuclease	--	Uncharacterized protein {ECO:0000313|EMBL:EJF58572.1} OS=Dichomitus squalens (strain LYAD-421) PE=4 SV=1	hypothetical protein DICSQDRAFT_66655 [Dichomitus squalens LYAD-421 SS1]
EVM0007336.1	--	--	--	--	--	--	Uncharacterized protein {ECO:0000313|EMBL:EIW51425.1} OS=Trametes versicolor (strain FP-101664) PE=4 SV=1	hypothetical protein TRAVEDRAFT_47609 [Trametes versicolor FP-101664 SS1]
EVM0006133.1	--	--	--	--	--	--	Uncharacterized protein {ECO:0000313|EMBL:CDO70569.1} OS=Pycnoporus cinnabarinus (Cinnabar-red polypore) PE=4 SV=1	hypothetical protein DICSQDRAFT_179846 [Dichomitus squalens LYAD-421 SS1]
EVM0009792.3	Molecular Function: nucleotide binding (GO:0000166); Biological Process: cellular process (GO:0009987);	--	[DT]	--	G-protein alpha subunit	Guanine nucleotide-binding protein alpha-4 subunit GN=GPA4 OS=Ustilago maydis (strain 521 / FGSC 9021) PE=3 SV=1	Uncharacterized protein {ECO:0000313|EMBL:CDO77298.1} OS=Pycnoporus cinnabarinus (Cinnabar-red polypore) PE=4 SV=1	G-alpha-domain-containing protein [Dichomitus squalens LYAD-421 SS1]
EVM0010733.1	--	K08495|1.84995e-152|dsq:DICSQDRAFT_131435|V-snare-domain-containing protein; K08495 golgi SNAP receptor complex member 1 (A)	[U]	Intracellular trafficking, secretion, and vesicular transport	Snare region anchored in the vesicle membrane C-terminus	Golgi SNAP receptor complex member 1 GN=GOS1 OS=Saccharomyces cerevisiae (strain ATCC 204508 / S288c) PE=1 SV=1	Golgi SNAP receptor complex member 1 {ECO:0000256|PIRNR:PIRNR027109} OS=Fomitopsis pinicola (strain FP-58527) PE=3 SV=1	V-snare-domain-containing protein [Dichomitus squalens LYAD-421 SS1]
EVM0010073.1	--	--	--	--	bZIP transcription factor	--	Uncharacterized protein {ECO:0000313|EMBL:EJF56557.1} OS=Dichomitus squalens (strain LYAD-421) PE=4 SV=1	hypothetical protein DICSQDRAFT_157861 [Dichomitus squalens LYAD-421 SS1]
EVM0012906.1	Molecular Function: organic cyclic compound binding (GO:0097159); Molecular Function: heterocyclic compound binding (GO:1901363);	--	[L]	Replication, recombination and repair	SNF2 family N-terminal domain	DNA repair protein RAD5 GN=RAD5 OS=Yarrowia lipolytica (strain CLIB 122 / E 150) PE=3 SV=1	Uncharacterized protein {ECO:0000313|EMBL:EJF57190.1} OS=Dichomitus squalens (strain LYAD-421) PE=4 SV=1	hypothetical protein DICSQDRAFT_183319 [Dichomitus squalens LYAD-421 SS1]
EVM0002087.1	--	--	--	--	--	--	Uncharacterized protein {ECO:0000313|EMBL:EMD38920.1} OS=Ceriporiopsis subvermispora (strain B) PE=4 SV=1	hypothetical protein DICSQDRAFT_125191 [Dichomitus squalens LYAD-421 SS1]
EVM0003543.1	--	--	--	--	Rare lipoprotein A (RlpA)-like double-psi beta-barrel	--	Barwin-like endoglucanase {ECO:0000313|EMBL:EJF58907.1} OS=Dichomitus squalens (strain LYAD-421) PE=4 SV=1	barwin-like endoglucanase [Dichomitus squalens LYAD-421 SS1]
EVM0008858.1	Biological Process: metabolic process (GO:0008152); Molecular Function: oxidoreductase activity (GO:0016491); Molecular Function: metal ion binding (GO:0046872);	K00276|0|dsq:DICSQDRAFT_85414|peroxisomal copper amine oxidase; K00276 primary-amine oxidase [EC:1.4.3.21] (A)	[Q]	Secondary metabolites biosynthesis, transport and catabolism	Copper amine oxidase, enzyme domain	Copper amine oxidase 1 GN=cao1 OS=Schizosaccharomyces pombe (strain 972 / ATCC 24843) PE=1 SV=1	Amine oxidase {ECO:0000256|RuleBase:RU000672} OS=Dichomitus squalens (strain LYAD-421) PE=3 SV=1	peroxisomal copper amine oxidase [Dichomitus squalens LYAD-421 SS1]
EVM0011922.1	--	--	--	--	--	--	Uncharacterized protein {ECO:0000313|EMBL:EJF56461.1} OS=Dichomitus squalens (strain LYAD-421) PE=4 SV=1	hypothetical protein TRAVEDRAFT_24525 [Trametes versicolor FP-101664 SS1]
EVM0010904.1	Biological Process: sodium ion transport (GO:0006814); Biological Process: regulation of pH (GO:0006885); Molecular Function: sodium:proton antiporter activity (GO:0015385); Cellular Component: integral component of membrane (GO:0016021); Biological Process: transmembrane transport (GO:0055085);	K12041|0|dsq:DICSQDRAFT_107884|sodium/hydrogen exchanger; K12041 solute carrier family 9 (sodium/hydrogen exchanger), member 6/7 (A)	[P]	Inorganic ion transport and metabolism	Sodium/hydrogen exchanger family	Endosomal/prevacuolar sodium/hydrogen exchanger (Precursor) GN=D9461.40 OS=Saccharomyces cerevisiae (strain ATCC 204508 / S288c) PE=1 SV=1	Sodium/hydrogen exchanger {ECO:0000256|RuleBase:RU003722} OS=Dichomitus squalens (strain LYAD-421) PE=3 SV=1	sodium/hydrogen exchanger [Dichomitus squalens LYAD-421 SS1]
EVM0012062.1	Molecular Function: translation initiation factor activity (GO:0003743); Biological Process: translational initiation (GO:0006413);	K03236|4.16057e-97|cci:CC1G_06281|eukaryotic translation initiation factor 1A; K03236 translation initiation factor 1A (A)	[J]	Translation, ribosomal structure and biogenesis	Translation initiation factor 1A / IF-1	Eukaryotic translation initiation factor 1A GN=tif11 OS=Schizosaccharomyces pombe (strain 972 / ATCC 24843) PE=2 SV=2	Uncharacterized protein {ECO:0000313|EMBL:CDO74476.1} OS=Pycnoporus cinnabarinus (Cinnabar-red polypore) PE=3 SV=1	hypothetical protein BN946_scf184979.g31 [Trametes cinnabarina]
EVM0000452.1	--	--	--	--	--	--	Uncharacterized protein {ECO:0000313|EMBL:EJF59935.1} OS=Dichomitus squalens (strain LYAD-421) PE=4 SV=1	hypothetical protein DICSQDRAFT_138149 [Dichomitus squalens LYAD-421 SS1]
EVM0010292.1	--	--	--	--	Ring finger domain	--	Uncharacterized protein {ECO:0000313|EMBL:CDO69859.1} OS=Pycnoporus cinnabarinus (Cinnabar-red polypore) PE=4 SV=1	hypothetical protein DICSQDRAFT_160511 [Dichomitus squalens LYAD-421 SS1]
EVM0001709.1	--	--	--	--	--	--	Uncharacterized protein {ECO:0000313|EMBL:EPS97209.1} OS=Fomitopsis pinicola (strain FP-58527) PE=4 SV=1	hypothetical protein DICSQDRAFT_178131 [Dichomitus squalens LYAD-421 SS1]
EVM0001860.1	--	K14311|0|dsq:DICSQDRAFT_58800|hypothetical protein; K14311 nuclear pore complex protein Nup188 (A)	--	--	Nucleoporin subcomplex protein binding to Pom34	Nucleoporin nup184 GN=nup184 OS=Schizosaccharomyces pombe (strain 972 / ATCC 24843) PE=4 SV=1	Uncharacterized protein {ECO:0000313|EMBL:EJF62178.1} OS=Dichomitus squalens (strain LYAD-421) PE=4 SV=1	hypothetical protein DICSQDRAFT_58800 [Dichomitus squalens LYAD-421 SS1]
EVM0006349.1	--	--	[R]	General function prediction only	NIF3 (NGG1p interacting factor 3)	Putative GTP cyclohydrolase 1 type 2 GN=SPCC126.12 OS=Schizosaccharomyces pombe (strain 972 / ATCC 24843) PE=3 SV=1	Putative GTP cyclohydrolase 1 type 2 {ECO:0000256|RuleBase:RU004385} OS=Pycnoporus cinnabarinus (Cinnabar-red polypore) PE=3 SV=1	NIF3-like protein-like protein [Dichomitus squalens LYAD-421 SS1]
EVM0009950.1	--	--	--	--	Isochorismatase family	--	YcaC protein {ECO:0000313|EMBL:EJF59217.1} OS=Dichomitus squalens (strain LYAD-421) PE=4 SV=1	ycaC protein [Dichomitus squalens LYAD-421 SS1]
EVM0012431.1	--	K15303|0|dsq:DICSQDRAFT_49120|Aldo/keto reductase; K15303 aflatoxin B1 aldehyde reductase (A)	--	--	Aldo/keto reductase family	Putative voltage-gated potassium channel subunit beta GN=SPCC965.06 OS=Schizosaccharomyces pombe (strain 972 / ATCC 24843) PE=3 SV=1	Uncharacterized protein {ECO:0000313|EMBL:CDO68345.1} OS=Pycnoporus cinnabarinus (Cinnabar-red polypore) PE=4 SV=1	Aldo/keto reductase [Dichomitus squalens LYAD-421 SS1]
EVM0006857.1	Cellular Component: endoplasmic reticulum (GO:0005783); Biological Process: protein retention in ER lumen (GO:0006621); Biological Process: protein transport (GO:0015031); Cellular Component: integral component of membrane (GO:0016021); Molecular Function: ER retention sequence binding (GO:0046923);	K10949|2.32525e-123|dsq:DICSQDRAFT_137320|ER lumen protein retaining receptor; K10949 ER lumen protein retaining receptor (A)	[U]	Intracellular trafficking, secretion, and vesicular transport	ER lumen protein retaining receptor	ER lumen protein-retaining receptor GN=erd2 OS=Schizosaccharomyces pombe (strain 972 / ATCC 24843) PE=3 SV=1	ER lumen protein-retaining receptor {ECO:0000256|RuleBase:RU000634} OS=Pycnoporus cinnabarinus (Cinnabar-red polypore) PE=3 SV=1	ER lumen protein retaining receptor [Trametes versicolor FP-101664 SS1]
EVM0000094.1	--	--	--	--	Fungal specific transcription factor domain	Nitrogen assimilation transcription factor nirA GN=nirA OS=Emericella nidulans (strain FGSC A4 / ATCC 38163 / CBS 112.46 / NRRL PE=3 SV=1	Uncharacterized protein {ECO:0000313|EMBL:CDO75511.1} OS=Pycnoporus cinnabarinus (Cinnabar-red polypore) PE=4 SV=1	hypothetical protein DICSQDRAFT_151251 [Dichomitus squalens LYAD-421 SS1]
EVM0003238.1	Molecular Function: polygalacturonase activity (GO:0004650); Cellular Component: extracellular region (GO:0005576); Biological Process: carbohydrate metabolic process (GO:0005975);	--	--	--	Glycosyl hydrolases family 28	Exopolygalacturonase X (Precursor) GN=pgaX OS=Aspergillus niger PE=3 SV=1	Pectin lyase-like protein {ECO:0000313|EMBL:EJF55753.1} OS=Dichomitus squalens (strain LYAD-421) PE=3 SV=1	pectin lyase-like protein [Dichomitus squalens LYAD-421 SS1]
EVM0010653.1	--	--	[R]	General function prediction only	Major Facilitator Superfamily	Quinidine resistance protein 1 GN=QDR1 OS=Saccharomyces cerevisiae (strain ATCC 204508 / S288c) PE=1 SV=1	Uncharacterized protein {ECO:0000313|EMBL:CDO75510.1} OS=Pycnoporus cinnabarinus (Cinnabar-red polypore) PE=4 SV=1	MFS general substrate transporter [Trametes versicolor FP-101664 SS1]
EVM0012537.1	Molecular Function: transferase activity, transferring acyl groups (GO:0016746);	K00671|0|dsq:DICSQDRAFT_49258|N-myristoyl transferase; K00671 glycylpeptide N-tetradecanoyltransferase [EC:2.3.1.97] (A)	[I]	Lipid transport and metabolism	Myristoyl-CoA:protein N-myristoyltransferase, N-terminal domain	Glycylpeptide N-tetradecanoyltransferase OS=Cryptococcus neoformans (Filobasidiella neoformans) PE=1 SV=3	Glycylpeptide N-tetradecanoyltransferase {ECO:0000256|RuleBase:RU000586} OS=Pycnoporus cinnabarinus (Cinnabar-red polypore) PE=3 SV=1	N-myristoyl transferase [Dichomitus squalens LYAD-421 SS1]
EVM0005708.1	Cellular Component: nucleus (GO:0005634); Biological Process: regulation of transcription, DNA-templated (GO:0006355); Molecular Function: NAD-dependent histone deacetylase activity (H3-K14 specific) (GO:0032041); Molecular Function: NAD-dependent histone deacetylase activity (H3-K9 specific) (GO:0046969); Molecular Function: NAD-dependent histone deacetylase activity (H4-K16 specific) (GO:004697…	K06067|0|dsq:DICSQDRAFT_130738|histone deacetylase; K06067 histone deacetylase 1/2 [EC:3.5.1.98] (A)	[B]	Chromatin structure and dynamics	Histone deacetylase domain	Histone deacetylase RPD3 GN=N0305 OS=Saccharomyces cerevisiae (strain ATCC 204508 / S288c) PE=1 SV=1	Histone deacetylase {ECO:0000256|PIRNR:PIRNR037913} OS=Ceriporiopsis subvermispora (strain B) PE=3 SV=1	histone deacetylase [Dichomitus squalens LYAD-421 SS1]
EVM0007849.1	--	--	--	--	Thaumatin family	--	Osmotin, thaumatin-like protein {ECO:0000313|EMBL:EPQ60063.1} OS=Gloeophyllum trabeum (strain ATCC 11539 / FP-39264 / Madison 617) PE=4 SV=1	Osmotin thaumatin-like protein [Dichomitus squalens LYAD-421 SS1]
EVM0004685.1	--	--	--	--	--	--	Uncharacterized protein {ECO:0000313|EMBL:EJF56069.1} OS=Dichomitus squalens (strain LYAD-421) PE=4 SV=1	hypothetical protein DICSQDRAFT_175265 [Dichomitus squalens LYAD-421 SS1]
EVM0001636.1	--	K15278|9.9338e-132|pco:PHACADRAFT_157946|hypothetical protein; K15278 solute carrier family 35 (UDP-xylose/UDP-N-acetylglucosamine transporter), member B4 (A)	[G]	Carbohydrate transport and metabolism	UAA transporter family	UDP-N-acetylglucosamine transporter yea4 GN=yea4 OS=Schizosaccharomyces pombe (strain 972 / ATCC 24843) PE=3 SV=1	Uncharacterized protein {ECO:0000313|EMBL:EKM59548.1} OS=Phanerochaete carnosa (strain HHB-10118-sp) PE=4 SV=1	UAA transporter [Trametes versicolor FP-101664 SS1]
EVM0011722.1	--	--	[G]	Carbohydrate transport and metabolism	Major Facilitator Superfamily	Uncharacterized transporter ESBP6 OS=Saccharomyces cerevisiae (strain ATCC 204508 / S288c) PE=1 SV=1	MFS general substrate transporter {ECO:0000313|EMBL:EJF60969.1} OS=Dichomitus squalens (strain LYAD-421) PE=4 SV=1	MFS general substrate transporter [Dichomitus squalens LYAD-421 SS1]
EVM0007684.1	--	--	--	--	--	--	Uncharacterized protein {ECO:0000313|EMBL:CDO73142.1} OS=Pycnoporus cinnabarinus (Cinnabar-red polypore) PE=4 SV=1	hypothetical protein DICSQDRAFT_46885 [Dichomitus squalens LYAD-421 SS1]
EVM0013263.1	Molecular Function: signal transducer activity (GO:0004871); Cellular Component: heterotrimeric G-protein complex (GO:0005834); Biological Process: G-protein coupled receptor signaling pathway (GO:0007186);	K07973|1.2353e-47|dsq:DICSQDRAFT_49286|G-protein gamma subunit; K07973 guanine nucleotide-binding protein subunit gamma, other (A)	--	--	GGL domain	Guanine nucleotide-binding protein subunit gamma (Precursor) GN=gg1 OS=Lentinula edodes (Shiitake mushroom) PE=3 SV=1	G-protein gamma subunit {ECO:0000313|EMBL:EIW51820.1} OS=Trametes versicolor (strain FP-101664) PE=4 SV=1	G-protein gamma subunit [Dichomitus squalens LYAD-421 SS1]
EVM0005739.1	--	--	--	--	ACT domain	--	Uncharacterized protein {ECO:0000313|EMBL:EJF57340.1} OS=Dichomitus squalens (strain LYAD-421) PE=4 SV=1	hypothetical protein DICSQDRAFT_69696 [Dichomitus squalens LYAD-421 SS1]
EVM0006043.3	--	--	[CR]	--	FAD binding domain	Kynurenine 3-monooxygenase {ECO:0000255|HAMAP-Rule:MF_03018} OS=Chaetomium globosum (strain ATCC 6205 / CBS 148.51 / DSM 1962 / NBRC PE=3 SV=1	FAD/NAD(P)-binding domain-containing protein {ECO:0000313|EMBL:EJF59080.1} OS=Dichomitus squalens (strain LYAD-421) PE=4 SV=1	FAD/NAD(P)-binding domain-containing protein [Dichomitus squalens LYAD-421 SS1]
EVM0001751.1	--	--	[Q]	Secondary metabolites biosynthesis, transport and catabolism	Cytochrome P450	O-methylsterigmatocystin oxidoreductase GN=ordA OS=Aspergillus flavus (strain ATCC 200026 / FGSC A1120 / NRRL 3357 / JCM PE=2 SV=1	Uncharacterized protein {ECO:0000313|EMBL:CDO78260.1} OS=Pycnoporus cinnabarinus (Cinnabar-red polypore) PE=3 SV=1	CyP450 monooxygenase [Trametes versicolor FP-101664 SS1]
EVM0011411.1	--	--	[S]	Function unknown	Uncharacterised conserved protein (DUF2361)	rRNA-processing protein EFG1 GN=EFG1 OS=Coprinopsis cinerea (strain Okayama-7 / 130 / ATCC MYA-4618 / FGSC PE=3 SV=1	Uncharacterized protein {ECO:0000313|EMBL:EJF60693.1} OS=Dichomitus squalens (strain LYAD-421) PE=4 SV=1	hypothetical protein DICSQDRAFT_107108 [Dichomitus squalens LYAD-421 SS1]
EVM0009637.1	Molecular Function: structural constituent of ribosome (GO:0003735); Cellular Component: ribosome (GO:0005840); Biological Process: translation (GO:0006412);	K02891|1.39005e-73|dsq:DICSQDRAFT_142155|ribosomal protein L22; K02891 large subunit ribosomal protein L22e (A)	[J]	Translation, ribosomal structure and biogenesis	Ribosomal L22e protein family	60S ribosomal protein L22 GN=rpl22 OS=Schizosaccharomyces pombe (strain 972 / ATCC 24843) PE=1 SV=3	Uncharacterized protein {ECO:0000313|EMBL:CCM00898.1} OS=Fibroporia radiculosa (strain TFFH 294) PE=4 SV=1	ribosomal protein L22 [Dichomitus squalens LYAD-421 SS1]
EVM0005799.1	--	--	--	--	--	--	Uncharacterized protein {ECO:0000313|EMBL:EJF57076.1} OS=Dichomitus squalens (strain LYAD-421) PE=4 SV=1	hypothetical protein DICSQDRAFT_92661 [Dichomitus squalens LYAD-421 SS1]
EVM0011443.1	--	--	--	--	--	--	Uncharacterized protein {ECO:0000313|EMBL:EJF58166.1} OS=Dichomitus squalens (strain LYAD-421) PE=4 SV=1	hypothetical protein DICSQDRAFT_129072 [Dichomitus squalens LYAD-421 SS1]
EVM0012049.1	--	--	[B]	Chromatin structure and dynamics	Helicase conserved C-terminal domain	ATP-dependent helicase fft3 GN=fft3 OS=Schizosaccharomyces pombe (strain 972 / ATCC 24843) PE=1 SV=1	Uncharacterized protein {ECO:0000313|EMBL:EJF58185.1} (Fragment) OS=Dichomitus squalens (strain LYAD-421) PE=4 SV=1	hypothetical protein DICSQDRAFT_67720, partial [Dichomitus squalens LYAD-421 SS1]
EVM0002956.1	--	--	[G]	Carbohydrate transport and metabolism	Major Facilitator Superfamily	Riboflavin transporter MCH5 GN=MCH5 OS=Saccharomyces cerevisiae (strain ATCC 204508 / S288c) PE=1 SV=2	MFS general substrate transporter {ECO:0000313|EMBL:EJF60553.1} OS=Dichomitus squalens (strain LYAD-421) PE=4 SV=1	MFS general substrate transporter [Dichomitus squalens LYAD-421 SS1]
EVM0007949.1	--	--	--	--	--	--	Uncharacterized protein {ECO:0000313|EMBL:EMD32350.1} OS=Ceriporiopsis subvermispora (strain B) PE=4 SV=1	hypothetical protein CERSUDRAFT_58618 [Ceriporiopsis subvermispora B]
EVM0005864.1	--	--	--	--	Erythromycin esterase	--	Uncharacterized protein {ECO:0000313|EMBL:CDO72391.1} OS=Pycnoporus cinnabarinus (Cinnabar-red polypore) PE=4 SV=1	hypothetical protein DICSQDRAFT_45785 [Dichomitus squalens LYAD-421 SS1]
EVM0001079.1	--	--	--	--	--	--	Uncharacterized protein {ECO:0000313|EMBL:CDO75189.1} OS=Pycnoporus cinnabarinus (Cinnabar-red polypore) PE=4 SV=1	hypothetical protein DICSQDRAFT_80562 [Dichomitus squalens LYAD-421 SS1]
EVM0008114.1	--	--	--	--	--	--	Uncharacterized protein {ECO:0000313|EMBL:CDO68145.1} OS=Pycnoporus cinnabarinus (Cinnabar-red polypore) PE=3 SV=1	hypothetical protein DICSQDRAFT_160677 [Dichomitus squalens LYAD-421 SS1]
EVM0012563.3	--	--	--	--	--	--	Uncharacterized protein {ECO:0000313|EMBL:EJF56657.1} OS=Dichomitus squalens (strain LYAD-421) PE=4 SV=1	hypothetical protein DICSQDRAFT_141101 [Dichomitus squalens LYAD-421 SS1]
EVM0009710.1	--	--	--	--	Senescence-associated protein	--	Uncharacterized protein {ECO:0000313|EMBL:CDO68917.1} OS=Pycnoporus cinnabarinus (Cinnabar-red polypore) PE=4 SV=1	hypothetical protein DICSQDRAFT_84580 [Dichomitus squalens LYAD-421 SS1]
EVM0003271.1	Molecular Function: catalytic activity (GO:0003824); Biological Process: metabolic process (GO:0008152);	K01469|0|dsq:DICSQDRAFT_153553|cytoplasmic protein; K01469 5-oxoprolinase (ATP-hydrolysing) [EC:3.5.2.9] (A)	[E]	Amino acid transport and metabolism	Hydantoinase B/oxoprolinase	Uncharacterized protein C11D3.14c GN=SPAC11D3.14c OS=Schizosaccharomyces pombe (strain 972 / ATCC 24843) PE=3 SV=1	Uncharacterized protein {ECO:0000313|EMBL:CDO70103.1} OS=Pycnoporus cinnabarinus (Cinnabar-red polypore) PE=4 SV=1	cytoplasmic protein [Dichomitus squalens LYAD-421 SS1]
EVM0002584.1	--	--	--	--	--	--	Uncharacterized protein {ECO:0000313|EMBL:EJF56003.1} OS=Dichomitus squalens (strain LYAD-421) PE=4 SV=1	hypothetical protein DICSQDRAFT_158072 [Dichomitus squalens LYAD-421 SS1]
EVM0004716.1	--	--	[R]	General function prediction only	Thioesterase superfamily	--	Uncharacterized protein {ECO:0000313|EMBL:EJF59679.1} OS=Dichomitus squalens (strain LYAD-421) PE=4 SV=1	hypothetical protein DICSQDRAFT_89055 [Dichomitus squalens LYAD-421 SS1]
EVM0000684.1	--	--	[R]	General function prediction only	Sds3-like	Midasin GN=mdn1 OS=Schizosaccharomyces pombe (strain 972 / ATCC 24843) PE=1 SV=1	Uncharacterized protein {ECO:0000313|EMBL:EJF56103.1} OS=Dichomitus squalens (strain LYAD-421) PE=4 SV=1	hypothetical protein DICSQDRAFT_164003 [Dichomitus squalens LYAD-421 SS1]
EVM0006189.1	Biological Process: transcription, DNA-templated (GO:0006351);	--	--	--	Fungal specific transcription factor domain	Nitrogen assimilation transcription factor nit-4 GN=nit-4 OS=Neurospora crassa (strain ATCC 24698 / 74-OR23-1A / CBS 708.71 / DSM PE=3 SV=2	Uncharacterized protein {ECO:0000313|EMBL:EJF62146.1} OS=Dichomitus squalens (strain LYAD-421) PE=4 SV=1	hypothetical protein DICSQDRAFT_180038 [Dichomitus squalens LYAD-421 SS1]
EVM0011845.1	Molecular Function: nucleotide binding (GO:0000166); Molecular Function: nucleic acid binding (GO:0003676);	--	[O]	Posttranslational modification, protein turnover, chaperones	RNA recognition motif. (a.k.a. RRM, RBD, or RNP domain)	Peptidyl-prolyl cis-trans isomerase E GN=cyp10 OS=Rhizopus delemar (strain RA 99-880 / ATCC MYA-4621 / FGSC 9543 / NRRL PE=3 SV=1	Uncharacterized protein {ECO:0000313|EMBL:CCM02375.1} OS=Fibroporia radiculosa (strain TFFH 294) PE=4 SV=1	RNA-binding domain-containing protein [Dichomitus squalens LYAD-421 SS1]
EVM0007648.1	--	--	--	--	--	--	Uncharacterized protein {ECO:0000313|EMBL:EJF58552.1} OS=Dichomitus squalens (strain LYAD-421) PE=4 SV=1	hypothetical protein DICSQDRAFT_172903 [Dichomitus squalens LYAD-421 SS1]
EVM0011562.1	--	--	[S]	Function unknown	Family of unknown function (DUF500)	SH3 domain-containing protein PJ696.02 GN=SPAPJ696.02 OS=Schizosaccharomyces pombe (strain 972 / ATCC 24843) PE=1 SV=1	Uncharacterized protein {ECO:0000313|EMBL:CDO71202.1} OS=Pycnoporus cinnabarinus (Cinnabar-red polypore) PE=4 SV=1	hypothetical protein DICSQDRAFT_82430 [Dichomitus squalens LYAD-421 SS1]
EVM0012473.1	--	K00997|2.32382e-77|dsq:DICSQDRAFT_57108|4'-phosphopantetheinyl transferase; K00997 holo-[acyl-carrier protein] synthase [EC:2.7.8.7] (A)	--	--	4'-phosphopantetheinyl transferase superfamily	Putative holo-[acyl-carrier-protein] synthase GN=new8 OS=Schizosaccharomyces pombe (strain 972 / ATCC 24843) PE=2 SV=1	Uncharacterized protein {ECO:0000313|EMBL:EPT02854.1} OS=Fomitopsis pinicola (strain FP-58527) PE=3 SV=1	4&apos;-phosphopantetheinyl transferase [Dichomitus squalens LYAD-421 SS1]
EVM0007313.1	--	K10251|1.91799e-174|dsq:DICSQDRAFT_157890|NAD(P)-binding protein; K10251 17beta-estradiol 17-dehydrogenase / very-long-chain 3-oxoacyl-CoA reductase [EC:1.1.1.62 1.1.1.330] (A)	[I]	Lipid transport and metabolism	short chain dehydrogenase	Very-long-chain 3-oxoacyl-CoA reductase {ECO:0000255|HAMAP-Rule:MF_03107} GN=SPAC4G9.15 OS=Schizosaccharomyces pombe (strain 972 / ATCC 24843) PE=3 SV=1	NAD(P)-binding protein {ECO:0000313|EMBL:EJF56521.1} OS=Dichomitus squalens (strain LYAD-421) PE=4 SV=1	NAD(P)-binding protein [Dichomitus squalens LYAD-421 SS1]
EVM0004864.1	--	K05658|0|dsq:DICSQDRAFT_105392|P-loop containing nucleoside triphosphate hydrolase protein; K05658 ATP-binding cassette, subfamily B (MDR/TAP), member 1 [EC:3.6.3.44] (A)	[Q]	Secondary metabolites biosynthesis, transport and catabolism	ABC transporter transmembrane region	Alpha-factor-transporting ATPase GN=STE6 OS=Saccharomyces cerevisiae (strain ATCC 204508 / S288c) PE=1 SV=1	P-loop containing nucleoside triphosphate hydrolase protein {ECO:0000313|EMBL:EJF61731.1} OS=Dichomitus squalens (strain LYAD-421) PE=3 SV=1	P-loop containing nucleoside triphosphate hydrolase protein [Dichomitus squalens LYAD-421 SS1]
EVM0002704.1	--	K03024|9.04002e-92|dsq:DICSQDRAFT_138268|hypothetical protein; K03024 DNA-directed RNA polymerase III subunit RPC7 (A)	--	--	DNA-directed RNA polymerase III subunit Rpc31	--	Uncharacterized protein {ECO:0000313|EMBL:EJF59806.1} OS=Dichomitus squalens (strain LYAD-421) PE=4 SV=1	hypothetical protein DICSQDRAFT_138268 [Dichomitus squalens LYAD-421 SS1]
EVM0007601.1	--	--	--	--	--	--	Uncharacterized protein {ECO:0000313|EMBL:CDO71227.1} OS=Pycnoporus cinnabarinus (Cinnabar-red polypore) PE=4 SV=1	hypothetical protein TRAVEDRAFT_63721 [Trametes versicolor FP-101664 SS1]
EVM0001404.1	--	--	--	--	Endonuclease/Exonuclease/phosphatase family	--	Uncharacterized protein {ECO:0000313|EMBL:CDO71547.1} OS=Pycnoporus cinnabarinus (Cinnabar-red polypore) PE=4 SV=1	hypothetical protein BN946_scf184911.g17 [Trametes cinnabarina]
EVM0001109.1	--	--	--	--	Ankyrin repeats (3 copies)	--	Predicted protein {ECO:0000313|EMBL:EED77701.1} (Fragment) OS=Postia placenta (strain ATCC 44394 / Madison 698-R) PE=4 SV=1	ankyrin [Trametes versicolor FP-101664 SS1]
EVM0004870.1	--	--	--	--	--	--	Uncharacterized protein {ECO:0000313|EMBL:EJF58164.1} OS=Dichomitus squalens (strain LYAD-421) PE=4 SV=1	hypothetical protein DICSQDRAFT_163071 [Dichomitus squalens LYAD-421 SS1]
EVM0010989.1	--	--	--	--	--	--	Uncharacterized protein {ECO:0000313|EMBL:CDO77580.1} OS=Pycnoporus cinnabarinus (Cinnabar-red polypore) PE=4 SV=1	hypothetical protein TRAVEDRAFT_66660 [Trametes versicolor FP-101664 SS1]
EVM0001696.1	--	--	[R]	General function prediction only	Major Facilitator Superfamily	MFS antiporter QDR3 {ECO:0000305} OS=Candida albicans (strain SC5314 / ATCC MYA-2876) PE=2 SV=1	Vacuolar DHA amino acid exporter {ECO:0000313|EMBL:EJF61025.1} OS=Dichomitus squalens (strain LYAD-421) PE=4 SV=1	vacuolar DHA amino acid exporter [Dichomitus squalens LYAD-421 SS1]
EVM0005201.1	--	--	[R]	General function prediction only	Histidine phosphatase superfamily (branch 2)	3-phytase A (Precursor) GN=phyA OS=Aspergillus oryzae (strain ATCC 42149 / RIB 40) PE=2 SV=1	Uncharacterized protein {ECO:0000313|EMBL:CDO72281.1} OS=Pycnoporus cinnabarinus (Cinnabar-red polypore) PE=4 SV=1	hypothetical protein BN946_scf184970.g133 [Trametes cinnabarina]
EVM0008871.1	--	--	--	--	Cupin	--	RmlC-like cupin {ECO:0000313|EMBL:EJF61214.1} OS=Dichomitus squalens (strain LYAD-421) PE=4 SV=1	RmlC-like cupin [Dichomitus squalens LYAD-421 SS1]
EVM0004847.1	Molecular Function: catalytic activity (GO:0003824); Biological Process: metabolic process (GO:0008152);	K00988|0|dsq:DICSQDRAFT_79827|HIT-like protein; K00988 ATP adenylyltransferase [EC:2.7.7.53] (A)	--	--	ATP adenylyltransferase	5&apos;,5&apos;&apos;&apos;-P-1,P-4-tetraphosphate phosphorylase 2 GN=APA2 OS=Kluyveromyces lactis (strain ATCC 8585 / CBS 2359 / DSM 70799 / NBRC PE=3 SV=1	Uncharacterized protein {ECO:0000313|EMBL:CCM01925.1} OS=Fibroporia radiculosa (strain TFFH 294) PE=4 SV=1	HIT-like protein [Dichomitus squalens LYAD-421 SS1]
EVM0005487.1	--	--	--	--	--	--	Uncharacterized protein {ECO:0000313|EMBL:EJF56306.1} OS=Dichomitus squalens (strain LYAD-421) PE=4 SV=1	hypothetical protein DICSQDRAFT_175043 [Dichomitus squalens LYAD-421 SS1]
EVM0007470.1	--	--	--	--	--	--	Uncharacterized protein {ECO:0000313|EMBL:EIW51771.1} OS=Trametes versicolor (strain FP-101664) PE=4 SV=1	hypothetical protein DICSQDRAFT_166003 [Dichomitus squalens LYAD-421 SS1]
EVM0013188.1	Cellular Component: membrane (GO:0016020);	--	[S]	Function unknown	Integral membrane protein DUF106	ER membrane protein complex subunit 3 GN=SPBC1711.03 OS=Schizosaccharomyces pombe (strain 972 / ATCC 24843) PE=3 SV=1	Uncharacterized protein {ECO:0000313|EMBL:EMD40634.1} OS=Ceriporiopsis subvermispora (strain B) PE=4 SV=1	transmembrane protein [Trametes versicolor FP-101664 SS1]
EVM0010832.1	--	K03136|0|dsq:DICSQDRAFT_112614|hypothetical protein; K03136 transcription initiation factor TFIIE subunit alpha (A)	[K]	Transcription	TFIIE alpha subunit	Transcription initiation factor IIE subunit alpha GN=tfa1 OS=Schizosaccharomyces pombe (strain 972 / ATCC 24843) PE=1 SV=3	Uncharacterized protein {ECO:0000313|EMBL:EJF56810.1} OS=Dichomitus squalens (strain LYAD-421) PE=4 SV=1	hypothetical protein DICSQDRAFT_112614 [Dichomitus squalens LYAD-421 SS1]
EVM0012263.1	--	--	--	--	Membrane-associating domain	--	Uncharacterized protein {ECO:0000313|EMBL:CDO74249.1} OS=Pycnoporus cinnabarinus (Cinnabar-red polypore) PE=4 SV=1	hypothetical protein DICSQDRAFT_52495 [Dichomitus squalens LYAD-421 SS1]
EVM0008967.2	--	--	--	--	BNR repeat-like domain	--	Glycoside hydrolase family 93 protein {ECO:0000313|EMBL:EFI93195.1} OS=Schizophyllum commune (strain H4-8 / FGSC 9210) PE=4 SV=1	neuraminidase [Dichomitus squalens LYAD-421 SS1]
EVM0008400.1	--	--	--	--	--	--	Uncharacterized protein {ECO:0000313|EMBL:CDO71406.1} OS=Pycnoporus cinnabarinus (Cinnabar-red polypore) PE=4 SV=1	--
EVM0002139.1	--	--	--	--	F-box-like	Antagonist of mitotic exit network protein 1 GN=AMN1 OS=Kluyveromyces lactis (strain ATCC 8585 / CBS 2359 / DSM 70799 / NBRC PE=3 SV=1	Uncharacterized protein {ECO:0000313|EMBL:EJF56102.1} OS=Dichomitus squalens (strain LYAD-421) PE=4 SV=1	hypothetical protein DICSQDRAFT_72184 [Dichomitus squalens LYAD-421 SS1]
EVM0008367.1	Molecular Function: ATP binding (GO:0005524); Biological Process: response to stress (GO:0006950);	K03283|0|dsq:DICSQDRAFT_96981|heat shock protein; K03283 heat shock 70kDa protein 1/8 (A)	[O]	Posttranslational modification, protein turnover, chaperones	Hsp70 protein	Heat shock protein SSB GN=SSB OS=Kluyveromyces lactis (strain ATCC 8585 / CBS 2359 / DSM 70799 / NBRC PE=3 SV=3	Uncharacterized protein {ECO:0000313|EMBL:CDO70718.1} OS=Pycnoporus cinnabarinus (Cinnabar-red polypore) PE=3 SV=1	heat shock protein [Dichomitus squalens LYAD-421 SS1]
EVM0005002.1	--	--	--	--	NADH(P)-binding	--	Uncharacterized protein {ECO:0000313|EMBL:CDO76593.1} OS=Pycnoporus cinnabarinus (Cinnabar-red polypore) PE=4 SV=1	hypothetical protein BN946_scf184868.g7 [Trametes cinnabarina]
EVM0007428.1	--	K11771|0|dsq:DICSQDRAFT_46065|hypothetical protein; K11771 SWI/SNF chromatin-remodeling complex subunit SWI1 (A)	--	--	ARID/BRIGHT DNA binding domain	--	Uncharacterized protein {ECO:0000313|EMBL:EKM60949.1} OS=Phanerochaete carnosa (strain HHB-10118-sp) PE=4 SV=1	hypothetical protein DICSQDRAFT_46065 [Dichomitus squalens LYAD-421 SS1]
EVM0007268.1	--	--	--	--	--	--	Uncharacterized protein {ECO:0000313|EMBL:CDO72298.1} OS=Pycnoporus cinnabarinus (Cinnabar-red polypore) PE=4 SV=1	hypothetical protein DICSQDRAFT_150988 [Dichomitus squalens LYAD-421 SS1]
EVM0003536.1	Molecular Function: oxidoreductase activity (GO:0016491);	--	[Q]	Secondary metabolites biosynthesis, transport and catabolism	Flavin-binding monooxygenase-like	Thiol-specific monooxygenase GN=fmo1 OS=Schizosaccharomyces pombe (strain 972 / ATCC 24843) PE=1 SV=1	FAD/NAD(P)-binding domain-containing protein {ECO:0000313|EMBL:EJF61004.1} OS=Dichomitus squalens (strain LYAD-421) PE=4 SV=1	FAD/NAD(P)-binding domain-containing protein [Dichomitus squalens LYAD-421 SS1]
EVM0003035.1	--	--	[G]	Carbohydrate transport and metabolism	GMC oxidoreductase	Uncharacterized transporter C11D3.18C GN=SPAC11D3.18c OS=Schizosaccharomyces pombe (strain 972 / ATCC 24843) PE=3 SV=1	Alcohol oxidase {ECO:0000313|EMBL:EJF60344.1} OS=Dichomitus squalens (strain LYAD-421) PE=3 SV=1	alcohol oxidase [Dichomitus squalens LYAD-421 SS1]
EVM0008203.1	--	K11407|0|dsq:DICSQDRAFT_179735|histone deacetylase complex protein; K11407 histone deacetylase 6 [EC:3.5.1.98] (A)	[B]	Chromatin structure and dynamics	Histone deacetylase domain	Histone deacetylase clr3 GN=clr3 OS=Schizosaccharomyces pombe (strain 972 / ATCC 24843) PE=1 SV=1	Uncharacterized protein {ECO:0000313|EMBL:CDO76009.1} OS=Pycnoporus cinnabarinus (Cinnabar-red polypore) PE=4 SV=1	histone deacetylase complex protein [Dichomitus squalens LYAD-421 SS1]
EVM0003879.1	--	--	--	--	--	--	Predicted protein {ECO:0000313|EMBL:EDR00963.1} OS=Laccaria bicolor (strain S238N-H82 / ATCC MYA-4686) PE=4 SV=1	hypothetical protein STEHIDRAFT_164937 [Stereum hirsutum FP-91666 SS1]
EVM0000221.1	--	K02429|0|dsq:DICSQDRAFT_159500|MFS general substrate transporter; K02429 MFS transporter, FHS family, L-fucose permease (A)	--	--	Major Facilitator Superfamily	--	Uncharacterized protein {ECO:0000313|EMBL:EMD37869.1} OS=Ceriporiopsis subvermispora (strain B) PE=4 SV=1	MFS general substrate transporter [Dichomitus squalens LYAD-421 SS1]
EVM0011713.1	Molecular Function: actin binding (GO:0003779); Cellular Component: intracellular (GO:0005622);	--	[Z]	Cytoskeleton	Cofilin/tropomyosin-type actin-binding protein	Protein app1 GN=app1 OS=Schizosaccharomyces pombe (strain 972 / ATCC 24843) PE=2 SV=1	Actin depolymerizing protein {ECO:0000313|EMBL:EJF55893.1} OS=Dichomitus squalens (strain LYAD-421) PE=4 SV=1	actin depolymerizing protein [Dichomitus squalens LYAD-421 SS1]
EVM0000410.1	--	--	[R]	General function prediction only	Histidine phosphatase superfamily (branch 2)	Acid phosphatase PHO1 (Precursor) GN=PHO1 OS=Komagataella pastoris (Yeast) PE=2 SV=1	Uncharacterized protein {ECO:0000313|EMBL:EKM53795.1} OS=Phanerochaete carnosa (strain HHB-10118-sp) PE=4 SV=1	phosphoglycerate mutase-like protein [Dichomitus squalens LYAD-421 SS1]
EVM0010205.1	Molecular Function: structural constituent of ribosome (GO:0003735); Cellular Component: ribosome (GO:0005840); Biological Process: translation (GO:0006412);	K02908|1.18809e-75|dsq:DICSQDRAFT_100824|60S ribosomal protein L30; K02908 large subunit ribosomal protein L30e (A)	[J]	Translation, ribosomal structure and biogenesis	Ribosomal protein L7Ae/L30e/S12e/Gadd45 family	60S ribosomal protein L30-1 GN=rpl30a OS=Schizosaccharomyces pombe (strain 972 / ATCC 24843) PE=3 SV=2	Uncharacterized protein {ECO:0000313|EMBL:CCM00368.1} OS=Fibroporia radiculosa (strain TFFH 294) PE=4 SV=1	60S ribosomal protein L30 [Dichomitus squalens LYAD-421 SS1]
EVM0006693.1	Molecular Function: nucleotide binding (GO:0000166); Biological Process: transport (GO:0006810); Biological Process: cellular process (GO:0009987); Molecular Function: ATPase activity (GO:0016887);	--	[Q]	Secondary metabolites biosynthesis, transport and catabolism	ABC transporter	ATP-dependent bile acid permease GN=YBT1 OS=Saccharomyces cerevisiae (strain ATCC 204508 / S288c) PE=1 SV=2	Uncharacterized protein {ECO:0000313|EMBL:CCL99292.1} OS=Fibroporia radiculosa (strain TFFH 294) PE=3 SV=1	P-loop containing nucleoside triphosphate hydrolase protein [Dichomitus squalens LYAD-421 SS1]
EVM0007389.1	Molecular Function: protein serine/threonine kinase activity (GO:0004674); Molecular Function: ATP binding (GO:0005524); Biological Process: protein phosphorylation (GO:0006468);	K13303|0|dsq:DICSQDRAFT_81901|Pkinase-domain-containing protein; K13303 serum/glucocorticoid-regulated kinase 2 [EC:2.7.11.1] (A)	[RT]	--	Protein kinase domain	Serine/threonine-protein kinase gad8 GN=gad8 OS=Schizosaccharomyces pombe (strain 972 / ATCC 24843) PE=1 SV=1	Uncharacterized protein {ECO:0000313|EMBL:EMD36513.1} OS=Ceriporiopsis subvermispora (strain B) PE=4 SV=1	Pkinase-domain-containing protein [Dichomitus squalens LYAD-421 SS1]
EVM0006811.1	Biological Process: metabolic process (GO:0008152); Molecular Function: oxidoreductase activity (GO:0016491);	--	--	--	Pyridoxamine 5'-phosphate oxidase	Protein bli-3 GN=bli-3 OS=Neurospora crassa (strain ATCC 24698 / 74-OR23-1A / CBS 708.71 / DSM PE=2 SV=1	Uncharacterized protein {ECO:0000313|EMBL:CDO69229.1} OS=Pycnoporus cinnabarinus (Cinnabar-red polypore) PE=4 SV=1	hypothetical protein BN946_scf185042.g131 [Trametes cinnabarina]
EVM0006198.1	Molecular Function: binding (GO:0005488); Molecular Function: oxidoreductase activity (GO:0016491);	--	[Q]	Secondary metabolites biosynthesis, transport and catabolism	Cytochrome P450	Cytochrome P450 52A11 GN=CYP52A11 OS=Candida maltosa (Yeast) PE=2 SV=1	Cytochrome P450 {ECO:0000313|EMBL:EJF55944.1} OS=Dichomitus squalens (strain LYAD-421) PE=3 SV=1	cytochrome P450 [Dichomitus squalens LYAD-421 SS1]
EVM0001219.1	--	--	[CR]	--	NADH:flavin oxidoreductase / NADH oxidase family	NADPH dehydrogenase 3 GN=OYE3 OS=Saccharomyces cerevisiae (strain ATCC 204508 / S288c) PE=1 SV=2	FMN-linked oxidoreductase {ECO:0000313|EMBL:EJF61469.1} OS=Dichomitus squalens (strain LYAD-421) PE=4 SV=1	FMN-linked oxidoreductase [Dichomitus squalens LYAD-421 SS1]
EVM0007808.1	--	--	--	--	Domain of unknown function (DUF1917)	--	Uncharacterized protein {ECO:0000313|EMBL:EJF57513.1} OS=Dichomitus squalens (strain LYAD-421) PE=4 SV=1	hypothetical protein DICSQDRAFT_163352 [Dichomitus squalens LYAD-421 SS1]
EVM0004112.1	Molecular Function: structural constituent of ribosome (GO:0003735); Cellular Component: ribosome (GO:0005840); Biological Process: translation (GO:0006412);	K02871|6.39193e-111|dsq:DICSQDRAFT_58271|60S ribosomal protein L23; K02871 large subunit ribosomal protein L13 (A)	[J]	Translation, ribosomal structure and biogenesis	Ribosomal protein L13	54S ribosomal protein L23, mitochondrial (Precursor) GN=MRPL23 OS=Saccharomyces cerevisiae (strain ATCC 204508 / S288c) PE=1 SV=1	60S ribosomal protein L23 {ECO:0000313|EMBL:EJF62179.1} OS=Dichomitus squalens (strain LYAD-421) PE=3 SV=1	60S ribosomal protein L23 [Dichomitus squalens LYAD-421 SS1]
EVM0011475.1	--	--	--	--	--	--	Uncharacterized protein {ECO:0000313|EMBL:EIW51632.1} (Fragment) OS=Trametes versicolor (strain FP-101664) PE=4 SV=1	hypothetical protein CY34DRAFT_94561 [Suillus luteus UH-Slu-Lm8-n1]
EVM0002677.1	--	--	[T]	Signal transduction mechanisms	Endonuclease/Exonuclease/phosphatase family	--	Uncharacterized protein {ECO:0000313|EMBL:CDO75556.1} OS=Pycnoporus cinnabarinus (Cinnabar-red polypore) PE=4 SV=1	hypothetical protein DICSQDRAFT_153137 [Dichomitus squalens LYAD-421 SS1]
EVM0009153.1	Biological Process: cellular metabolic process (GO:0044237); Biological Process: primary metabolic process (GO:0044238); Biological Process: organic substance metabolic process (GO:0071704);	K00921|0|dsq:DICSQDRAFT_104978|hypothetical protein; K00921 1-phosphatidylinositol-3-phosphate 5-kinase [EC:2.7.1.150] (A)	[T]	Signal transduction mechanisms	Phosphatidylinositol-4-phosphate 5-Kinase	1-phosphatidylinositol 3-phosphate 5-kinase FAB1 GN=FAB1 OS=Saccharomyces cerevisiae (strain ATCC 204508 / S288c) PE=1 SV=3	Uncharacterized protein {ECO:0000313|EMBL:EJF61887.1} OS=Dichomitus squalens (strain LYAD-421) PE=4 SV=1	hypothetical protein DICSQDRAFT_104978 [Dichomitus squalens LYAD-421 SS1]
EVM0005286.1	--	K02427|1.73521e-151|dsq:DICSQDRAFT_149599|S-adenosyl-L-methionine-dependent methyltransferase; K02427 23S rRNA (uridine2552-2'-O)-methyltransferase [EC:2.1.1.166] (A)	[D]	Cell cycle control, cell division, chromosome partitioning	FtsJ-like methyltransferase	rRNA methyltransferase 2, mitochondrial {ECO:0000303|PubMed:11867542} (Precursor) GN=G2830 OS=Saccharomyces cerevisiae (strain ATCC 204508 / S288c) PE=1 SV=1	S-adenosyl-L-methionine-dependent methyltransferase {ECO:0000313|EMBL:EJF57691.1} OS=Dichomitus squalens (strain LYAD-421) PE=3 SV=1	S-adenosyl-L-methionine-dependent methyltransferase [Dichomitus squalens LYAD-421 SS1]
EVM0010902.1	--	--	[S]	Function unknown	Protein of unknown function (DUF1649)	Meiotically up-regulated gene 66 protein GN=mug66 OS=Schizosaccharomyces pombe (strain 972 / ATCC 24843) PE=1 SV=1	Uncharacterized protein {ECO:0000313|EMBL:EMD32500.1} OS=Ceriporiopsis subvermispora (strain B) PE=4 SV=1	hypothetical protein DICSQDRAFT_131783 [Dichomitus squalens LYAD-421 SS1]
EVM0008288.1	--	K09528|5.89654e-127|dsq:DICSQDRAFT_159911|DnaJ-domain-containing protein; K09528 DnaJ homolog subfamily C member 8 (A)	[O]	Posttranslational modification, protein turnover, chaperones	DnaJ domain	J domain-containing protein spf31 GN=spf31 OS=Schizosaccharomyces pombe (strain 972 / ATCC 24843) PE=3 SV=1	Uncharacterized protein {ECO:0000313|EMBL:CCM01394.1} OS=Fibroporia radiculosa (strain TFFH 294) PE=4 SV=1	DnaJ-domain-containing protein [Dichomitus squalens LYAD-421 SS1]
EVM0002886.1	Molecular Function: ATP binding (GO:0005524); Biological Process: obsolete ATP catabolic process (GO:0006200); Cellular Component: integral component of membrane (GO:0016021); Molecular Function: ATPase activity, coupled to transmembrane movement of substances (GO:0042626); Biological Process: transmembrane transport (GO:0055085);	--	[Q]	Secondary metabolites biosynthesis, transport and catabolism	ABC transporter transmembrane region	Oligomycin resistance ATP-dependent permease YOR1 GN=YOR1 OS=Saccharomyces cerevisiae (strain ATCC 204508 / S288c) PE=1 SV=1	Uncharacterized protein {ECO:0000313|EMBL:CDO74908.1} OS=Pycnoporus cinnabarinus (Cinnabar-red polypore) PE=3 SV=1	P-loop containing nucleoside triphosphate hydrolase protein [Dichomitus squalens LYAD-421 SS1]
EVM0011441.1	--	--	--	--	--	--	Uncharacterized protein {ECO:0000313|EMBL:CDO72752.1} OS=Pycnoporus cinnabarinus (Cinnabar-red polypore) PE=4 SV=1	hypothetical protein DICSQDRAFT_99501 [Dichomitus squalens LYAD-421 SS1]
EVM0003954.1	--	K14284|0|dsq:DICSQDRAFT_133364|NTF2-like protein; K14284 nuclear RNA export factor (A)	[A]	RNA processing and modification	TAP C-terminal domain	mRNA export factor mex67 GN=mex67 OS=Schizosaccharomyces pombe (strain 972 / ATCC 24843) PE=1 SV=1	Uncharacterized protein {ECO:0000313|EMBL:CDO77394.1} OS=Pycnoporus cinnabarinus (Cinnabar-red polypore) PE=4 SV=1	NTF2-like protein [Dichomitus squalens LYAD-421 SS1]
EVM0005557.1	--	--	--	--	Spt20 family	SAGA complex subunit spt20 GN=spt20 OS=Schizosaccharomyces pombe (strain 972 / ATCC 24843) PE=1 SV=1	Putative uncharacterized protein {ECO:0000313|EMBL:EGN95119.1} OS=Serpula lacrymans var. lacrymans (strain S7.3) PE=4 SV=1	hypothetical protein DICSQDRAFT_81015, partial [Dichomitus squalens LYAD-421 SS1]
EVM0006243.1	--	--	--	--	--	--	--	hypothetical protein DICSQDRAFT_168980 [Dichomitus squalens LYAD-421 SS1]
EVM0010813.1	Molecular Function: protoheme IX farnesyltransferase activity (GO:0008495); Cellular Component: integral component of membrane (GO:0016021); Biological Process: heme O biosynthetic process (GO:0048034);	K02257|0|dsq:DICSQDRAFT_72742|protoheme IX farnesyltransferase; K02257 protoheme IX farnesyltransferase [EC:2.5.1.-] (A)	[H]	Coenzyme transport and metabolism	UbiA prenyltransferase family	Protoheme IX farnesyltransferase, mitochondrial (Precursor) GN=COX10 OS=Yarrowia lipolytica (strain CLIB 122 / E 150) PE=3 SV=1	Protoheme IX farnesyltransferase {ECO:0000313|EMBL:EJF55849.1} OS=Dichomitus squalens (strain LYAD-421) PE=3 SV=1	protoheme IX farnesyltransferase [Dichomitus squalens LYAD-421 SS1]
EVM0002377.1	--	--	--	--	--	--	Uncharacterized protein {ECO:0000313|EMBL:EMD41006.1} OS=Ceriporiopsis subvermispora (strain B) PE=4 SV=1	hypothetical protein DICSQDRAFT_56357 [Dichomitus squalens LYAD-421 SS1]
EVM0004879.1	--	--	--	--	--	--	Uncharacterized protein {ECO:0000313|EMBL:CDO74933.1} OS=Pycnoporus cinnabarinus (Cinnabar-red polypore) PE=4 SV=1	hypothetical protein DICSQDRAFT_152954 [Dichomitus squalens LYAD-421 SS1]
EVM0004702.1	--	K08288|0|dsq:DICSQDRAFT_103611|endoplasmic reticulum protein; K08288 protein kinase C substrate 80K-H (A)	[T]	Signal transduction mechanisms	Glucosidase II beta subunit-like	Glucosidase 2 subunit beta (Precursor) GN=UM12045 OS=Ustilago maydis (strain 521 / FGSC 9021) PE=3 SV=1	Uncharacterized protein {ECO:0000313|EMBL:CDO74169.1} OS=Pycnoporus cinnabarinus (Cinnabar-red polypore) PE=4 SV=1	endoplasmic reticulum protein [Dichomitus squalens LYAD-421 SS1]
EVM0000971.1	--	--	--	--	--	--	Uncharacterized protein {ECO:0000313|EMBL:CDO75043.1} OS=Pycnoporus cinnabarinus (Cinnabar-red polypore) PE=4 SV=1	hypothetical protein BN946_scf184640.g18 [Trametes cinnabarina]
EVM0007380.1	--	--	--	--	MYND finger	SET domain and MYND-type zinc finger protein 6 GN=set6 OS=Schizosaccharomyces pombe (strain 972 / ATCC 24843) PE=3 SV=1	Uncharacterized protein {ECO:0000313|EMBL:EJF59854.1} OS=Dichomitus squalens (strain LYAD-421) PE=4 SV=1	hypothetical protein DICSQDRAFT_137978 [Dichomitus squalens LYAD-421 SS1]
EVM0002068.1	--	--	--	--	Elongator subunit Iki1	--	Uncharacterized protein {ECO:0000313|EMBL:CDO75260.1} OS=Pycnoporus cinnabarinus (Cinnabar-red polypore) PE=4 SV=1	hypothetical protein DICSQDRAFT_75550 [Dichomitus squalens LYAD-421 SS1]
EVM0002562.1	--	--	--	--	--	--	Uncharacterized protein {ECO:0000313|EMBL:EJF60205.1} OS=Dichomitus squalens (strain LYAD-421) PE=4 SV=1	hypothetical protein DICSQDRAFT_171430 [Dichomitus squalens LYAD-421 SS1]
EVM0002000.5	--	--	--	--	--	--	Uncharacterized protein {ECO:0000313|EMBL:CDO77277.1} OS=Pycnoporus cinnabarinus (Cinnabar-red polypore) PE=4 SV=1	hypothetical protein DICSQDRAFT_151718 [Dichomitus squalens LYAD-421 SS1]
EVM0008769.1	--	--	--	--	--	--	Uncharacterized protein {ECO:0000313|EMBL:EJF62244.1} OS=Dichomitus squalens (strain LYAD-421) PE=4 SV=1	hypothetical protein DICSQDRAFT_180122 [Dichomitus squalens LYAD-421 SS1]
EVM0012279.1	--	--	--	--	Protein of unknown function (DUF3421)	--	Uncharacterized protein {ECO:0000313|EMBL:ESK88785.1} OS=Moniliophthora roreri (strain MCA 2997) PE=4 SV=1	hypothetical protein DICSQDRAFT_98301 [Dichomitus squalens LYAD-421 SS1]
EVM0010112.1	--	K03843|0|dsq:DICSQDRAFT_146404|mannosyltransferase; K03843 alpha-1,3/alpha-1,6-mannosyltransferase [EC:2.4.1.132 2.4.1.257] (A)	[M]	Cell wall/membrane/envelope biogenesis	Glycosyl transferases group 1	Alpha-1,3/1,6-mannosyltransferase ALG2 GN=ALG2 OS=Rhizomucor pusillus PE=1 SV=1	Uncharacterized protein {ECO:0000313|EMBL:CCM04521.1} OS=Fibroporia radiculosa (strain TFFH 294) PE=4 SV=1	mannosyltransferase [Dichomitus squalens LYAD-421 SS1]
EVM0008438.1	Biological Process: cyclic nucleotide biosynthetic process (GO:0009190); Molecular Function: phosphorus-oxygen lyase activity (GO:0016849); Biological Process: intracellular signal transduction (GO:0035556);	--	[T]	Signal transduction mechanisms	Leucine Rich repeats (2 copies)	Adenylate cyclase GN=UAC1 OS=Ustilago maydis (strain 521 / FGSC 9021) PE=3 SV=1	Uncharacterized protein {ECO:0000313|EMBL:EMD33719.1} OS=Ceriporiopsis subvermispora (strain B) PE=4 SV=1	adenylate cyclase-like protein [Dichomitus squalens LYAD-421 SS1]
EVM0004377.1	--	--	[Q]	Secondary metabolites biosynthesis, transport and catabolism	Cytochrome P450	O-methylsterigmatocystin oxidoreductase GN=ordA OS=Aspergillus flavus (strain ATCC 200026 / FGSC A1120 / NRRL 3357 / JCM PE=2 SV=1	Cytochrome P450 98A3 {ECO:0000313|EMBL:EJF59323.1} OS=Dichomitus squalens (strain LYAD-421) PE=3 SV=1	cytochrome P450 98A3 [Dichomitus squalens LYAD-421 SS1]
EVM0005017.2	--	--	--	--	BTB/POZ domain	--	Uncharacterized protein {ECO:0000313|EMBL:CDO73343.1} OS=Pycnoporus cinnabarinus (Cinnabar-red polypore) PE=4 SV=1	hypothetical protein DICSQDRAFT_160095 [Dichomitus squalens LYAD-421 SS1]
EVM0008468.1	--	--	[UZ]	--	Vps52 / Sac2 family	Vacuolar protein sorting-associated protein 52 GN=vps52 OS=Schizosaccharomyces pombe (strain 972 / ATCC 24843) PE=3 SV=1	Vacuolar sorting protein {ECO:0000313|EMBL:EJF61135.1} OS=Dichomitus squalens (strain LYAD-421) PE=4 SV=1	vacuolar sorting protein [Dichomitus squalens LYAD-421 SS1]
EVM0000766.3	--	--	--	--	--	--	Uncharacterized protein {ECO:0000313|EMBL:EJF58585.1} OS=Dichomitus squalens (strain LYAD-421) PE=4 SV=1	hypothetical protein DICSQDRAFT_156664 [Dichomitus squalens LYAD-421 SS1]
EVM0007820.1	--	--	--	--	--	Protein priA (Precursor) GN=priA OS=Lentinula edodes (Shiitake mushroom) PE=2 SV=1	Uncharacterized protein {ECO:0000313|EMBL:EKM61501.1} OS=Phanerochaete carnosa (strain HHB-10118-sp) PE=4 SV=1	hypothetical protein DICSQDRAFT_48215 [Dichomitus squalens LYAD-421 SS1]
EVM0012968.1	--	--	--	--	--	--	Uncharacterized protein {ECO:0000313|EMBL:EIW51425.1} OS=Trametes versicolor (strain FP-101664) PE=4 SV=1	hypothetical protein TRAVEDRAFT_25088 [Trametes versicolor FP-101664 SS1]
EVM0009141.1	--	--	--	--	--	--	Uncharacterized protein {ECO:0000313|EMBL:CDO69900.1} OS=Pycnoporus cinnabarinus (Cinnabar-red polypore) PE=4 SV=1	hypothetical protein BN946_scf184884.g59 [Trametes cinnabarina]
EVM0000969.1	--	K12200|0|dsq:DICSQDRAFT_52996|pH-response regulator; K12200 programmed cell death 6-interacting protein (A)	[R]	General function prediction only	BRO1-like domain	pH-response regulator protein palA/RIM20 GN=RIM20 OS=Cryptococcus neoformans var. neoformans serotype D (strain JEC21 / PE=3 SV=1	Uncharacterized protein {ECO:0000313|EMBL:EPS94476.1} OS=Fomitopsis pinicola (strain FP-58527) PE=4 SV=1	pH-response regulator [Dichomitus squalens LYAD-421 SS1]
EVM0003339.1	Biological Process: tRNA dihydrouridine synthesis (GO:0002943); Molecular Function: tRNA dihydrouridine synthase activity (GO:0017150); Molecular Function: flavin adenine dinucleotide binding (GO:0050660); Biological Process: oxidation-reduction process (GO:0055114);	K05543|0|dsq:DICSQDRAFT_131815|FMN-linked oxidoreductase; K05543 tRNA-dihydrouridine synthase 2 [EC:1.3.1.91] (A)	[J]	Translation, ribosomal structure and biogenesis	Dihydrouridine synthase (Dus)	tRNA-dihydrouridine(20) synthase [NAD(P)+] GN=dus2 OS=Schizosaccharomyces pombe (strain 972 / ATCC 24843) PE=3 SV=1	Uncharacterized protein {ECO:0000313|EMBL:CDO77279.1} OS=Pycnoporus cinnabarinus (Cinnabar-red polypore) PE=4 SV=1	FMN-linked oxidoreductase [Dichomitus squalens LYAD-421 SS1]
EVM0003902.1	Molecular Function: iron ion binding (GO:0005506); Molecular Function: electron carrier activity (GO:0009055); Molecular Function: oxidoreductase activity, acting on paired donors, with incorporation or reduction of molecular oxygen (GO:0016705); Molecular Function: heme binding (GO:0020037); Biological Process: oxidation-reduction process (GO:0055114);	--	[QI]	--	Cytochrome P450	Cytochrome P450 52A10 GN=CYP52A10 OS=Candida maltosa (Yeast) PE=2 SV=1	Putative uncharacterized protein {ECO:0000313|EMBL:EEU35227.1} OS=Nectria haematococca (strain 77-13-4 / ATCC MYA-4622 / FGSC 9596 / PE=4 SV=1	hypothetical protein NECHADRAFT_97937 [Nectria haematococca mpVI 77-13-4]
EVM0002272.4	--	--	[J]	Translation, ribosomal structure and biogenesis	Amidase	Putative amidase C869.01 (Precursor) GN=SPAC869.01 OS=Schizosaccharomyces pombe (strain 972 / ATCC 24843) PE=3 SV=1	Amidase signature enzyme {ECO:0000313|EMBL:EJF59888.1} OS=Dichomitus squalens (strain LYAD-421) PE=4 SV=1	amidase signature enzyme [Dichomitus squalens LYAD-421 SS1]
EVM0006019.1	--	--	--	--	--	--	Uncharacterized protein {ECO:0000313|EMBL:CDO75544.1} OS=Pycnoporus cinnabarinus (Cinnabar-red polypore) PE=4 SV=1	hypothetical protein DICSQDRAFT_125082 [Dichomitus squalens LYAD-421 SS1]
EVM0003303.2	--	--	[I]	Lipid transport and metabolism	PAP2 superfamily	Dihydrosphingosine 1-phosphate phosphatase C823.11 GN=SPAC823.11 OS=Schizosaccharomyces pombe (strain 972 / ATCC 24843) PE=3 SV=1	Uncharacterized protein {ECO:0000313|EMBL:EJF56556.1} OS=Dichomitus squalens (strain LYAD-421) PE=4 SV=1	hypothetical protein DICSQDRAFT_71301 [Dichomitus squalens LYAD-421 SS1]
EVM0006525.1	Biological Process: drug transmembrane transport (GO:0006855); Molecular Function: drug transmembrane transporter activity (GO:0015238); Molecular Function: antiporter activity (GO:0015297); Cellular Component: membrane (GO:0016020);	K03327|0|dsq:DICSQDRAFT_93347|MOP flippase; K03327 multidrug resistance protein, MATE family (A)	[R]	General function prediction only	MatE	Uncharacterized transporter C11D3.06 GN=SPAC11D3.06 OS=Schizosaccharomyces pombe (strain 972 / ATCC 24843) PE=3 SV=1	MATE efflux family protein {ECO:0000313|EMBL:EIW51519.1} OS=Trametes versicolor (strain FP-101664) PE=4 SV=1	MATE efflux family protein [Trametes versicolor FP-101664 SS1]
EVM0002831.1	--	--	[S]	Function unknown	Vitamin B6 photo-protection and homoeostasis	--	Uncharacterized protein {ECO:0000313|EMBL:CDO71835.1} OS=Pycnoporus cinnabarinus (Cinnabar-red polypore) PE=4 SV=1	hypothetical protein DICSQDRAFT_80493 [Dichomitus squalens LYAD-421 SS1]
EVM0003622.1	Molecular Function: lyase activity (GO:0016829); Molecular Function: nutrient reservoir activity (GO:0045735);	--	--	--	Cupin domain	--	Oxalate decarboxylase {ECO:0000313|EMBL:EJF57579.1} OS=Dichomitus squalens (strain LYAD-421) PE=4 SV=1	oxalate decarboxylase [Dichomitus squalens LYAD-421 SS1]
EVM0011456.1	--	K14963|3.4112e-17|sla:SERLADRAFT_469850|hypothetical protein; K14963 COMPASS component SWD3 (A)	--	--	--	--	Uncharacterized protein {ECO:0000313|EMBL:CDO72145.1} OS=Pycnoporus cinnabarinus (Cinnabar-red polypore) PE=4 SV=1	hypothetical protein BN946_scf184962.g88 [Trametes cinnabarina]
EVM0012296.1	--	--	--	--	--	--	--	MFS general substrate transporter [Trametes versicolor FP-101664 SS1]
EVM0008575.1	Biological Process: regulation of cyclin-dependent protein serine/threonine kinase activity (GO:0000079); Cellular Component: nucleus (GO:0005634); Molecular Function: protein kinase binding (GO:0019901); Biological Process: cell division (GO:0051301);	--	[D]	Cell cycle control, cell division, chromosome partitioning	Cyclin, N-terminal domain	G2/mitotic-specific cyclin cdc13 GN=cdc13 OS=Schizosaccharomyces pombe (strain 972 / ATCC 24843) PE=1 SV=1	Uncharacterized protein {ECO:0000313|EMBL:CDO77384.1} OS=Pycnoporus cinnabarinus (Cinnabar-red polypore) PE=3 SV=1	hypothetical protein DICSQDRAFT_52549 [Dichomitus squalens LYAD-421 SS1]
EVM0002897.1	--	--	--	--	--	--	Uncharacterized protein {ECO:0000313|EMBL:EJF58592.1} OS=Dichomitus squalens (strain LYAD-421) PE=4 SV=1	hypothetical protein DICSQDRAFT_90406 [Dichomitus squalens LYAD-421 SS1]
EVM0004939.1	Biological Process: chromatin remodeling (GO:0006338); Cellular Component: Ino80 complex (GO:0031011);	K11673|0|dsq:DICSQDRAFT_153422|actin-like ATPase domain-containing protein; K11673 actin-related protein 8 (A)	[Z]	Cytoskeleton	Actin	Actin-like protein ARP8 GN=ARP8 OS=Saccharomyces cerevisiae (strain ATCC 204508 / S288c) PE=1 SV=1	Uncharacterized protein {ECO:0000313|EMBL:EPT01141.1} OS=Fomitopsis pinicola (strain FP-58527) PE=3 SV=1	actin-like ATPase domain-containing protein [Dichomitus squalens LYAD-421 SS1]
EVM0004412.1	--	--	--	--	--	--	Uncharacterized protein {ECO:0000313|EMBL:CDO75432.1} OS=Pycnoporus cinnabarinus (Cinnabar-red polypore) PE=4 SV=1	hypothetical protein DICSQDRAFT_134464 [Dichomitus squalens LYAD-421 SS1]
EVM0003213.1	--	--	--	--	--	--	Uncharacterized protein {ECO:0000313|EMBL:EJF62050.1} OS=Dichomitus squalens (strain LYAD-421) PE=4 SV=1	hypothetical protein DICSQDRAFT_169628 [Dichomitus squalens LYAD-421 SS1]
EVM0001029.1	--	--	--	--	--	--	Uncharacterized protein {ECO:0000313|EMBL:CDO70811.1} OS=Pycnoporus cinnabarinus (Cinnabar-red polypore) PE=4 SV=1	hypothetical protein BN946_scf184801.g2 [Trametes cinnabarina]
EVM0013333.1	--	--	[U]	Intracellular trafficking, secretion, and vesicular transport	Endonuclease/Exonuclease/phosphatase family	Probable inositol polyphosphate 5-phosphatase C9G1.10c GN=SPAC9G1.10c OS=Schizosaccharomyces pombe (strain 972 / ATCC 24843) PE=1 SV=2	DNase I-like protein {ECO:0000313|EMBL:EJF55840.1} OS=Dichomitus squalens (strain LYAD-421) PE=4 SV=1	DNase I-like protein [Dichomitus squalens LYAD-421 SS1]
EVM0012786.1	--	--	--	--	--	--	Uncharacterized protein {ECO:0000313|EMBL:EJF56088.1} OS=Dichomitus squalens (strain LYAD-421) PE=4 SV=1	hypothetical protein DICSQDRAFT_130284 [Dichomitus squalens LYAD-421 SS1]
EVM0008162.3	Molecular Function: zinc ion binding (GO:0008270);	K13127|0|dsq:DICSQDRAFT_132536|hypothetical protein; K13127 RING finger protein 113A (A)	[O]	Posttranslational modification, protein turnover, chaperones	Zinc finger C-x8-C-x5-C-x3-H type (and similar)	Pre-mRNA-splicing factor CWC24 GN=CWC24 OS=Cryptococcus neoformans var. neoformans serotype D (strain JEC21 / PE=3 SV=1	Uncharacterized protein {ECO:0000313|EMBL:CDO69178.1} OS=Pycnoporus cinnabarinus (Cinnabar-red polypore) PE=4 SV=1	hypothetical protein DICSQDRAFT_132536 [Dichomitus squalens LYAD-421 SS1]
EVM0009446.1	--	--	--	--	--	--	Uncharacterized protein {ECO:0000313|EMBL:CDO69486.1} OS=Pycnoporus cinnabarinus (Cinnabar-red polypore) PE=4 SV=1	hypothetical protein BN946_scf184662.g6 [Trametes cinnabarina]
EVM0002875.1	--	K03847|4.89206e-159|sla:SERLADRAFT_467450|glycosyltransferase family 22 protein; K03847 alpha-1,6-mannosyltransferase [EC:2.4.1.260] (A)	[MU]	--	Alg9-like mannosyltransferase family	Dol-P-Man:Man(7)GlcNAc(2)-PP-Dol alpha-1,6-mannosyltransferase GN=ALG12 OS=Saccharomyces cerevisiae (strain ATCC 204508 / S288c) PE=1 SV=1	Glycosyltransferase Family 22 protein {ECO:0000313|EMBL:CDO71804.1} OS=Pycnoporus cinnabarinus (Cinnabar-red polypore) PE=4 SV=1	hypothetical protein TRAVEDRAFT_126346 [Trametes versicolor FP-101664 SS1]
EVM0006545.1	--	K03133|1.93215e-100|gtr:GLOTRDRAFT_90972|TFIID-domain-containing protein; K03133 transcription initiation factor TFIID subunit 9B (A)	[K]	Transcription	Transcription initiation factor IID, 31kD subunit	Transcription initiation factor TFIID subunit 9 GN=YM9959.18 OS=Saccharomyces cerevisiae (strain ATCC 204508 / S288c) PE=1 SV=1	Uncharacterized protein {ECO:0000313|EMBL:CCM03378.1} OS=Fibroporia radiculosa (strain TFFH 294) PE=4 SV=1	predicted protein [Fibroporia radiculosa]
EVM0012528.1	--	--	--	--	--	--	Uncharacterized protein {ECO:0000313|EMBL:EJF56995.1} OS=Dichomitus squalens (strain LYAD-421) PE=4 SV=1	hypothetical protein DICSQDRAFT_183476 [Dichomitus squalens LYAD-421 SS1]
EVM0011914.1	--	--	--	--	Cortical protein marker for cell polarity	Polarized growth protein rax2 (Precursor) GN=rax2 OS=Schizosaccharomyces pombe (strain 972 / ATCC 24843) PE=1 SV=1	Uncharacterized protein {ECO:0000313|EMBL:CDO76716.1} OS=Pycnoporus cinnabarinus (Cinnabar-red polypore) PE=4 SV=1	hypothetical protein DICSQDRAFT_124409 [Dichomitus squalens LYAD-421 SS1]
EVM0007518.1	Molecular Function: DNA binding (GO:0003677); Molecular Function: DNA-directed DNA polymerase activity (GO:0003887); Cellular Component: nucleus (GO:0005634); Biological Process: DNA-dependent DNA replication (GO:0006261);	K02325|0|dsq:DICSQDRAFT_180809|epsilon DNA polymerase; K02325 DNA polymerase epsilon subunit 2 [EC:2.7.7.7] (A)	[L]	Replication, recombination and repair	DNA polymerase alpha/epsilon subunit B	DNA polymerase epsilon subunit B GN=DPB2 OS=Cryptococcus neoformans var. neoformans serotype D (strain JEC21 / PE=3 SV=1	Epsilon DNA polymerase {ECO:0000313|EMBL:EJF61186.1} OS=Dichomitus squalens (strain LYAD-421) PE=4 SV=1	epsilon DNA polymerase [Dichomitus squalens LYAD-421 SS1]
EVM0004504.1	--	--	--	--	--	--	Uncharacterized protein {ECO:0000313|EMBL:CDO68350.1} OS=Pycnoporus cinnabarinus (Cinnabar-red polypore) PE=4 SV=1	hypothetical protein DICSQDRAFT_177223 [Dichomitus squalens LYAD-421 SS1]
EVM0010910.1	--	--	--	--	--	--	Uncharacterized protein {ECO:0000313|EMBL:EIW51425.1} OS=Trametes versicolor (strain FP-101664) PE=4 SV=1	hypothetical protein TRAVEDRAFT_25088 [Trametes versicolor FP-101664 SS1]
EVM0005361.1	--	--	--	--	Cell division control protein 14, SIN component	Cell division control protein 14 GN=cdc14 OS=Schizosaccharomyces pombe (strain 972 / ATCC 24843) PE=1 SV=1	Uncharacterized protein {ECO:0000313|EMBL:EJF62149.1} OS=Dichomitus squalens (strain LYAD-421) PE=4 SV=1	hypothetical protein DICSQDRAFT_104373 [Dichomitus squalens LYAD-421 SS1]
EVM0007087.1	Cellular Component: integral component of membrane (GO:0016021); Biological Process: transmembrane transport (GO:0055085);	--	[G]	Carbohydrate transport and metabolism	Major Facilitator Superfamily	Uncharacterized transporter C1683.12 GN=SPBC1683.12 OS=Schizosaccharomyces pombe (strain 972 / ATCC 24843) PE=3 SV=1	Uncharacterized protein {ECO:0000313|EMBL:CDO73522.1} OS=Pycnoporus cinnabarinus (Cinnabar-red polypore) PE=4 SV=1	MFS general substrate transporter [Dichomitus squalens LYAD-421 SS1]
EVM0010171.1	Molecular Function: organic cyclic compound binding (GO:0097159); Molecular Function: heterocyclic compound binding (GO:1901363);	--	[K]	Transcription	RNA recognition motif. (a.k.a. RRM, RBD, or RNP domain)	Uncharacterized RNA-binding protein C25G10.01 OS=Schizosaccharomyces pombe (strain 972 / ATCC 24843) PE=1 SV=1	Putative uncharacterized protein {ECO:0000313|EMBL:EGO31235.1} OS=Serpula lacrymans var. lacrymans (strain S7.9) PE=4 SV=1	hypothetical protein SERLADRAFT_412645 [Serpula lacrymans var. lacrymans S7.9]
EVM0012590.1	--	--	--	--	--	--	Uncharacterized protein {ECO:0000313|EMBL:EPS92583.1} OS=Fomitopsis pinicola (strain FP-58527) PE=4 SV=1	hypothetical protein FOMPIDRAFT_1056731 [Fomitopsis pinicola FP-58527 SS1]
EVM0005146.1	Molecular Function: magnesium ion binding (GO:0000287); Molecular Function: phosphoacetylglucosamine mutase activity (GO:0004610); Biological Process: carbohydrate metabolic process (GO:0005975);	K01836|0|dsq:DICSQDRAFT_131042|phosphoacetylglucosamine mutase; K01836 phosphoacetylglucosamine mutase [EC:5.4.2.3] (A)	[G]	Carbohydrate transport and metabolism	Phosphoglucomutase/phosphomannomutase, alpha/beta/alpha domain I	Phosphoacetylglucosamine mutase {ECO:0000303|PubMed:11004509} OS=Candida albicans (Yeast) PE=1 SV=1	Uncharacterized protein {ECO:0000313|EMBL:CDO71629.1} OS=Pycnoporus cinnabarinus (Cinnabar-red polypore) PE=3 SV=1	phosphoacetylglucosamine mutase [Dichomitus squalens LYAD-421 SS1]
EVM0011029.1	Molecular Function: structural constituent of ribosome (GO:0003735); Cellular Component: ribosome (GO:0005840); Biological Process: translation (GO:0006412);	K02949|4.7447e-103|dsq:DICSQDRAFT_164575|hypothetical protein; K02949 small subunit ribosomal protein S11e (A)	[J]	Translation, ribosomal structure and biogenesis	Ribosomal protein S17	40S ribosomal protein S11 GN=rps11b OS=Schizosaccharomyces pombe (strain 972 / ATCC 24843) PE=2 SV=2	Uncharacterized protein {ECO:0000313|EMBL:EKM61068.1} OS=Phanerochaete carnosa (strain HHB-10118-sp) PE=3 SV=1	hypothetical protein TRAVEDRAFT_159130 [Trametes versicolor FP-101664 SS1]
EVM0011334.1	--	--	--	--	--	--	Uncharacterized protein {ECO:0000313|EMBL:EJF60135.1} OS=Dichomitus squalens (strain LYAD-421) PE=4 SV=1	hypothetical protein DICSQDRAFT_171363 [Dichomitus squalens LYAD-421 SS1]
EVM0002434.1	--	--	[G]	Carbohydrate transport and metabolism	Major Facilitator Superfamily	Riboflavin transporter MCH5 GN=MCH5 OS=Saccharomyces cerevisiae (strain ATCC 204508 / S288c) PE=1 SV=2	MFS general substrate transporter {ECO:0000313|EMBL:EJF56356.1} OS=Dichomitus squalens (strain LYAD-421) PE=4 SV=1	MFS general substrate transporter [Dichomitus squalens LYAD-421 SS1]
EVM0007132.1	--	--	--	--	Transposase family tnp2	--	Uncharacterized protein {ECO:0000313|EMBL:KDQ28554.1} (Fragment) OS=Pleurotus ostreatus PC15 PE=4 SV=1	hypothetical protein TRAVEDRAFT_132588, partial [Trametes versicolor FP-101664 SS1]
EVM0011703.1	--	--	--	--	--	--	Uncharacterized protein {ECO:0000313|EMBL:CDO72616.1} OS=Pycnoporus cinnabarinus (Cinnabar-red polypore) PE=4 SV=1	hypothetical protein TRAVEDRAFT_24251 [Trametes versicolor FP-101664 SS1]
EVM0011819.2	--	--	--	--	--	--	Uncharacterized protein {ECO:0000313|EMBL:CDO74880.1} OS=Pycnoporus cinnabarinus (Cinnabar-red polypore) PE=4 SV=1	hypothetical protein DICSQDRAFT_179910 [Dichomitus squalens LYAD-421 SS1]
EVM0011588.1	Cellular Component: intracellular (GO:0005622); Biological Process: RNA processing (GO:0006396);	K12867|0|dsq:DICSQDRAFT_158933|protein prenylyltransferase; K12867 pre-mRNA-splicing factor SYF1 (A)	[A]	RNA processing and modification	Tetratricopeptide repeat	Pre-mRNA-splicing factor SYF1 GN=SYF1 OS=Cryptococcus neoformans var. neoformans serotype D (strain JEC21 / PE=3 SV=1	Uncharacterized protein {ECO:0000313|EMBL:CCM02931.1} OS=Fibroporia radiculosa (strain TFFH 294) PE=4 SV=1	protein prenylyltransferase [Dichomitus squalens LYAD-421 SS1]
EVM0009089.1	--	--	--	--	Transposase family tnp2	--	Uncharacterized protein {ECO:0000313|EMBL:CDO68218.1} OS=Pycnoporus cinnabarinus (Cinnabar-red polypore) PE=4 SV=1	hypothetical protein BN946_scf184913.g8 [Trametes cinnabarina]
EVM0010479.1	--	--	--	--	--	--	Uncharacterized protein {ECO:0000313|EMBL:CDO74393.1} OS=Pycnoporus cinnabarinus (Cinnabar-red polypore) PE=4 SV=1	hypothetical protein DICSQDRAFT_54464 [Dichomitus squalens LYAD-421 SS1]
EVM0006567.1	--	--	--	--	--	--	Uncharacterized protein {ECO:0000313|EMBL:EJF61042.1} OS=Dichomitus squalens (strain LYAD-421) PE=4 SV=1	hypothetical protein DICSQDRAFT_106701 [Dichomitus squalens LYAD-421 SS1]
EVM0005529.2	--	--	--	--	--	--	Uncharacterized protein {ECO:0000313|EMBL:EIW51724.1} OS=Trametes versicolor (strain FP-101664) PE=4 SV=1	hypothetical protein DICSQDRAFT_135321 [Dichomitus squalens LYAD-421 SS1]
EVM0002225.1	Molecular Function: nucleotide binding (GO:0000166); Molecular Function: nucleic acid binding (GO:0003676);	K14411|7.04069e-104|dsq:DICSQDRAFT_63556|hypothetical protein; K14411 RNA-binding protein Musashi (A)	[A]	RNA processing and modification	RNA recognition motif. (a.k.a. RRM, RBD, or RNP domain)	Uncharacterized RNA-binding protein C660.15 GN=SPBC660.15 OS=Schizosaccharomyces pombe (strain 972 / ATCC 24843) PE=3 SV=1	Uncharacterized protein {ECO:0000313|EMBL:CCM02124.1} OS=Fibroporia radiculosa (strain TFFH 294) PE=4 SV=1	predicted protein [Fibroporia radiculosa]
EVM0004697.1	--	--	[A]	RNA processing and modification	--	--	Uncharacterized protein {ECO:0000313|EMBL:CDO70886.1} OS=Pycnoporus cinnabarinus (Cinnabar-red polypore) PE=4 SV=1	hypothetical protein DICSQDRAFT_166787 [Dichomitus squalens LYAD-421 SS1]
EVM0008856.1	--	--	--	--	--	--	Uncharacterized protein {ECO:0000313|EMBL:EJF62144.1} OS=Dichomitus squalens (strain LYAD-421) PE=4 SV=1	hypothetical protein DICSQDRAFT_104355 [Dichomitus squalens LYAD-421 SS1]
EVM0008109.1	--	--	[R]	General function prediction only	Integrase core domain	Transposon Tf2-9 polyprotein GN=Tf2-9 OS=Schizosaccharomyces pombe (strain 972 / ATCC 24843) PE=3 SV=1	Uncharacterized protein {ECO:0000313|EnsemblFungi:PTTG_04279P0} OS=Puccinia triticina (isolate 1-1 / race 1 (BBBD) PE=4 SV=1	hypothetical protein M378DRAFT_15858 [Amanita muscaria Koide BX008]
EVM0004438.1	--	--	[V]	Defense mechanisms	alpha/beta hydrolase fold	AB hydrolase superfamily protein C4A8.06c GN=SPAC4A8.06c OS=Schizosaccharomyces pombe (strain 972 / ATCC 24843) PE=3 SV=1	Uncharacterized protein {ECO:0000313|EMBL:CDO73086.1} OS=Pycnoporus cinnabarinus (Cinnabar-red polypore) PE=4 SV=1	hypothetical protein DICSQDRAFT_96349 [Dichomitus squalens LYAD-421 SS1]
EVM0006853.1	Molecular Function: microtubule motor activity (GO:0003777); Biological Process: microtubule-based movement (GO:0007018);	K10413|0|dsq:DICSQDRAFT_172670|dynein heavy chain; K10413 dynein heavy chain 1, cytosolic (A)	[Z]	Cytoskeleton	Dynein heavy chain, N-terminal region 1	Dynein heavy chain, cytoplasmic GN=ro-1 OS=Neurospora crassa (strain ATCC 24698 / 74-OR23-1A / CBS 708.71 / DSM PE=3 SV=1	Dynein heavy chain {ECO:0000313|EMBL:EJF58846.1} OS=Dichomitus squalens (strain LYAD-421) PE=4 SV=1	dynein heavy chain [Dichomitus squalens LYAD-421 SS1]
EVM0001380.1	--	K14649|2.07465e-167|dsq:DICSQDRAFT_168582|hypothetical protein; K14649 transcription initiation factor TFIID subunit 8 (A)	[K]	Transcription	Bromodomain associated	--	Uncharacterized protein {ECO:0000313|EMBL:CDO74002.1} OS=Pycnoporus cinnabarinus (Cinnabar-red polypore) PE=4 SV=1	hypothetical protein DICSQDRAFT_168582 [Dichomitus squalens LYAD-421 SS1]
EVM0010925.1	--	--	--	--	--	--	Uncharacterized protein {ECO:0000313|EMBL:EIW51428.1} OS=Trametes versicolor (strain FP-101664) PE=4 SV=1	hypothetical protein TRAVEDRAFT_20793 [Trametes versicolor FP-101664 SS1]
EVM0001435.1	--	--	[BK]	--	Sir2 family	NAD-dependent protein deacetylase hst4 GN=hst4 OS=Schizosaccharomyces pombe (strain 972 / ATCC 24843) PE=2 SV=1	Uncharacterized protein {ECO:0000313|EMBL:CDO75794.1} OS=Pycnoporus cinnabarinus (Cinnabar-red polypore) PE=4 SV=1	DHS-like NAD/FAD-binding domain-containing protein [Dichomitus squalens LYAD-421 SS1]
EVM0005520.1	--	--	--	--	--	--	--	hypothetical protein TRAVEDRAFT_23775 [Trametes versicolor FP-101664 SS1]
EVM0012377.1	--	--	[OE]	--	Serine carboxypeptidase	Carboxypeptidase Y homolog A (Precursor) GN=CPYA OS=Leptosphaeria maculans (strain JN3 / isolate v23.1.3 / race PE=3 SV=1	Carboxypeptidase {ECO:0000256|RuleBase:RU361156} OS=Dichomitus squalens (strain LYAD-421) PE=3 SV=1	serine carboxypeptidase [Dichomitus squalens LYAD-421 SS1]
EVM0009252.1	Biological Process: amino acid transport (GO:0006865); Cellular Component: membrane (GO:0016020); Biological Process: transmembrane transport (GO:0055085);	K16261|6.65386e-63|pco:PHACADRAFT_214364|hypothetical protein; K16261 yeast amino acid transporter (A)	[E]	Amino acid transport and metabolism	Amino acid permease	Lysine-specific permease GN=LYP1 OS=Saccharomyces cerevisiae (strain ATCC 204508 / S288c) PE=1 SV=2	Uncharacterized protein {ECO:0000313|EMBL:EKM49844.1} OS=Phanerochaete carnosa (strain HHB-10118-sp) PE=4 SV=1	hypothetical protein TRAVEDRAFT_75343 [Trametes versicolor FP-101664 SS1]
EVM0005086.1	--	K12177|0|dsq:DICSQDRAFT_60545|hypothetical protein; K12177 COP9 signalosome complex subunit 3 (A)	[OT]	--	--	COP9 signalosome complex subunit 3 GN=csnC OS=Emericella nidulans (strain FGSC A4 / ATCC 38163 / CBS 112.46 / NRRL PE=1 SV=2	Uncharacterized protein {ECO:0000313|EMBL:EJF61415.1} OS=Dichomitus squalens (strain LYAD-421) PE=4 SV=1	hypothetical protein DICSQDRAFT_60545 [Dichomitus squalens LYAD-421 SS1]
EVM0002412.1	--	--	--	--	--	--	Uncharacterized protein {ECO:0000313|EMBL:EJF57617.1} OS=Dichomitus squalens (strain LYAD-421) PE=4 SV=1	hypothetical protein DICSQDRAFT_183042 [Dichomitus squalens LYAD-421 SS1]
EVM0011203.1	--	--	--	--	--	--	Uncharacterized protein {ECO:0000313|EMBL:EIW51496.1} OS=Trametes versicolor (strain FP-101664) PE=4 SV=1	hypothetical protein TRAVEDRAFT_120276 [Trametes versicolor FP-101664 SS1]
EVM0007278.1	--	--	--	--	MYND finger	--	Uncharacterized protein {ECO:0000313|EMBL:CDO69713.1} OS=Pycnoporus cinnabarinus (Cinnabar-red polypore) PE=4 SV=1	hypothetical protein TRAVEDRAFT_64702 [Trametes versicolor FP-101664 SS1]
EVM0006220.1	--	--	[D]	Cell cycle control, cell division, chromosome partitioning	Sad1 / UNC-like C-terminal	Spindle pole body-associated protein sad1 GN=sad1 OS=Schizosaccharomyces pombe (strain 972 / ATCC 24843) PE=1 SV=1	Uncharacterized protein {ECO:0000313|EMBL:CDO74267.1} OS=Pycnoporus cinnabarinus (Cinnabar-red polypore) PE=4 SV=1	hypothetical protein BN946_scf184646.g1 [Trametes cinnabarina]
EVM0008225.1	--	--	[R]	General function prediction only	Protein kinase domain	Serine/threonine-protein kinase SMU1 GN=SMU1 OS=Ustilago maydis (strain 521 / FGSC 9021) PE=3 SV=1	Uncharacterized protein {ECO:0000313|EMBL:EJF57683.1} OS=Dichomitus squalens (strain LYAD-421) PE=4 SV=1	hypothetical protein PAXINDRAFT_97244 [Paxillus involutus ATCC 200175]
EVM0004810.1	--	--	[R]	General function prediction only	Zinc finger, C2H2 type	INO80 complex subunit 1 GN=iec1 OS=Schizosaccharomyces pombe (strain 972 / ATCC 24843) PE=1 SV=1	Uncharacterized protein {ECO:0000313|EMBL:EJF60853.1} OS=Dichomitus squalens (strain LYAD-421) PE=4 SV=1	hypothetical protein DICSQDRAFT_137077 [Dichomitus squalens LYAD-421 SS1]
EVM0009202.2	--	--	--	--	--	--	Uncharacterized protein {ECO:0000313|EMBL:EPT05294.1} OS=Fomitopsis pinicola (strain FP-58527) PE=4 SV=1	hypothetical protein DICSQDRAFT_179407 [Dichomitus squalens LYAD-421 SS1]
EVM0004834.1	--	--	[K]	Transcription	bZIP transcription factor	Transcriptional activator hac1 GN=hac1 OS=Hypocrea jecorina (Trichoderma reesei) PE=2 SV=1	Uncharacterized protein {ECO:0000313|EMBL:EJF57640.1} (Fragment) OS=Dichomitus squalens (strain LYAD-421) PE=4 SV=1	hypothetical protein DICSQDRAFT_15489, partial [Dichomitus squalens LYAD-421 SS1]
EVM0007304.1	--	--	--	--	--	--	Uncharacterized protein {ECO:0000313|EMBL:EMD32350.1} OS=Ceriporiopsis subvermispora (strain B) PE=4 SV=1	hypothetical protein CERSUDRAFT_58618 [Ceriporiopsis subvermispora B]
EVM0000887.1	--	--	--	--	CS domain	--	Uncharacterized protein {ECO:0000313|EMBL:CCM04311.1} OS=Fibroporia radiculosa (strain TFFH 294) PE=4 SV=1	hypothetical protein DICSQDRAFT_178276 [Dichomitus squalens LYAD-421 SS1]
EVM0005607.1	--	--	--	--	Putative S-adenosyl-L-methionine-dependent methyltransferase	NADH dehydrogenase [ubiquinone] complex I, assembly factor 7 homolog OS=Schizosaccharomyces pombe (strain 972 / ATCC 24843) PE=3 SV=2	Uncharacterized protein {ECO:0000313|EMBL:EJF59031.1} OS=Dichomitus squalens (strain LYAD-421) PE=4 SV=1	hypothetical protein DICSQDRAFT_182131 [Dichomitus squalens LYAD-421 SS1]
EVM0001745.1	--	--	--	--	--	--	Uncharacterized protein {ECO:0000313|EMBL:EJF60075.1} OS=Dichomitus squalens (strain LYAD-421) PE=4 SV=1	hypothetical protein DICSQDRAFT_171559 [Dichomitus squalens LYAD-421 SS1]
EVM0006579.1	Biological Process: transport (GO:0006810); Cellular Component: integral component of membrane (GO:0016021);	--	[C]	Energy production and conversion	Mitochondrial carrier protein	Uncharacterized mitochondrial carrier C1682.09c GN=SPCC1682.09c OS=Schizosaccharomyces pombe (strain 972 / ATCC 24843) PE=3 SV=1	Uncharacterized protein {ECO:0000313|EMBL:CCM03200.1} OS=Fibroporia radiculosa (strain TFFH 294) PE=3 SV=1	predicted protein [Fibroporia radiculosa]
EVM0012335.2	--	K14801|0|dsq:DICSQDRAFT_153270|hypothetical protein; K14801 pre-rRNA-processing protein TSR4 (A)	[R]	General function prediction only	Programmed cell death protein 2, C-terminal putative domain	Probable 20S rRNA accumulation protein 4 GN=SPBC25H2.15 OS=Schizosaccharomyces pombe (strain 972 / ATCC 24843) PE=3 SV=1	Uncharacterized protein {ECO:0000313|EMBL:CDO73246.1} OS=Pycnoporus cinnabarinus (Cinnabar-red polypore) PE=4 SV=1	hypothetical protein DICSQDRAFT_153270 [Dichomitus squalens LYAD-421 SS1]
EVM0009517.1	--	--	--	--	--	--	Uncharacterized protein {ECO:0000313|EMBL:EJF60314.1} OS=Dichomitus squalens (strain LYAD-421) PE=4 SV=1	hypothetical protein DICSQDRAFT_127807 [Dichomitus squalens LYAD-421 SS1]
EVM0006764.1	--	--	--	--	--	--	Uncharacterized protein {ECO:0000313|EMBL:EIW51397.1} (Fragment) OS=Trametes versicolor (strain FP-101664) PE=4 SV=1	hypothetical protein TRAVEDRAFT_126184, partial [Trametes versicolor FP-101664 SS1]
EVM0003674.1	--	--	--	--	--	--	Uncharacterized protein {ECO:0000313|EMBL:EJF56626.1} OS=Dichomitus squalens (strain LYAD-421) PE=4 SV=1	hypothetical protein DICSQDRAFT_56288 [Dichomitus squalens LYAD-421 SS1]
EVM0010547.1	Molecular Function: farnesyl-diphosphate farnesyltransferase activity (GO:0004310); Biological Process: lipid biosynthetic process (GO:0008610); Cellular Component: integral component of membrane (GO:0016021); Molecular Function: squalene synthase activity (GO:0051996);	K00801|0|dsq:DICSQDRAFT_125356|squalene synthase; K00801 farnesyl-diphosphate farnesyltransferase [EC:2.5.1.21] (A)	[I]	Lipid transport and metabolism	Squalene/phytoene synthase	Squalene synthase GN=ERG9 OS=Ustilago maydis (strain 521 / FGSC 9021) PE=3 SV=2	Squalene synthase {ECO:0000313|EMBL:ABF57213.1} OS=Ganoderma lucidum (Ling zhi medicinal fungus) PE=2 SV=1	squalene synthase [Ganoderma lucidum]
EVM0002770.1	--	--	--	--	--	--	Uncharacterized protein {ECO:0000313|EMBL:CDO70052.1} OS=Pycnoporus cinnabarinus (Cinnabar-red polypore) PE=4 SV=1	TT1751-like protein [Trametes versicolor FP-101664 SS1]
EVM0005761.1	Molecular Function: methylenetetrahydrofolate reductase (NAD(P)H) activity (GO:0004489); Biological Process: methionine metabolic process (GO:0006555); Biological Process: tetrahydrofolate interconversion (GO:0035999); Biological Process: oxidation-reduction process (GO:0055114);	K00297|0|dsq:DICSQDRAFT_177540|MTHFR-domain-containing protein; K00297 methylenetetrahydrofolate reductase (NADPH) [EC:1.5.1.20] (A)	[E]	Amino acid transport and metabolism	Methylenetetrahydrofolate reductase	Methylenetetrahydrofolate reductase 2 GN=met11 OS=Schizosaccharomyces pombe (strain 972 / ATCC 24843) PE=1 SV=2	Methylenetetrahydrofolate reductase {ECO:0000256|RuleBase:RU003862} OS=Pycnoporus cinnabarinus (Cinnabar-red polypore) PE=3 SV=1	MTHFR-domain-containing protein [Dichomitus squalens LYAD-421 SS1]
EVM0001031.1	--	--	--	--	--	--	Uncharacterized protein {ECO:0000313|EMBL:CDO70764.1} OS=Pycnoporus cinnabarinus (Cinnabar-red polypore) PE=4 SV=1	hypothetical protein DICSQDRAFT_151813 [Dichomitus squalens LYAD-421 SS1]
EVM0008719.1	Molecular Function: nucleic acid binding (GO:0003676); Molecular Function: ATP binding (GO:0005524); Molecular Function: ATP-dependent helicase activity (GO:0008026);	K12823|0|dsq:DICSQDRAFT_150401|DEAD-domain-containing protein; K12823 ATP-dependent RNA helicase DDX5/DBP2 [EC:3.6.4.13] (A)	[A]	RNA processing and modification	DEAD/DEAH box helicase	ATP-dependent RNA helicase DBP2-A GN=DBP2 OS=Cryptococcus neoformans var. neoformans serotype D (strain JEC21 / PE=3 SV=1	DEAD-domain-containing protein {ECO:0000313|EMBL:EJF56503.1} OS=Dichomitus squalens (strain LYAD-421) PE=3 SV=1	DEAD-domain-containing protein [Dichomitus squalens LYAD-421 SS1]
EVM0007510.1	--	--	--	--	--	--	Uncharacterized protein {ECO:0000313|EMBL:EPS94247.1} OS=Fomitopsis pinicola (strain FP-58527) PE=4 SV=1	hypothetical protein TRAVEDRAFT_148998 [Trametes versicolor FP-101664 SS1]
EVM0010059.1	--	--	[H]	Coenzyme transport and metabolism	Protein of unknown function (DUF2419)	UPF0553 protein C589.05c GN=SPAC589.05c OS=Schizosaccharomyces pombe (strain 972 / ATCC 24843) PE=3 SV=1	Uncharacterized protein {ECO:0000313|EMBL:EJF57176.1} OS=Dichomitus squalens (strain LYAD-421) PE=4 SV=1	hypothetical protein DICSQDRAFT_112117 [Dichomitus squalens LYAD-421 SS1]
EVM0000233.1	--	--	--	--	--	--	--	hypothetical protein TRAVEDRAFT_125252 [Trametes versicolor FP-101664 SS1]
EVM0001450.1	--	--	--	--	Sulfatase-modifying factor enzyme 1	Meiotically up-regulated gene 158 protein GN=mug158 OS=Schizosaccharomyces pombe (strain 972 / ATCC 24843) PE=1 SV=4	Uncharacterized protein {ECO:0000313|EMBL:CDO76366.1} OS=Pycnoporus cinnabarinus (Cinnabar-red polypore) PE=4 SV=1	hypothetical protein BN946_scf185011.g30 [Trametes cinnabarina]
EVM0004062.1	--	--	[O]	Posttranslational modification, protein turnover, chaperones	Zinc finger, C3HC4 type (RING finger)	--	Uncharacterized protein {ECO:0000313|EMBL:EJF57371.1} OS=Dichomitus squalens (strain LYAD-421) PE=4 SV=1	hypothetical protein DICSQDRAFT_163437 [Dichomitus squalens LYAD-421 SS1]
EVM0006481.1	Biological Process: dephosphorylation (GO:0016311); Molecular Function: phosphatase activity (GO:0016791);	--	[V]	Defense mechanisms	Dual specificity phosphatase, catalytic domain	Tyrosine-protein phosphatase YVH1 GN=YVH1 OS=Saccharomyces cerevisiae (strain ATCC 204508 / S288c) PE=1 SV=1	DSPc-domain-containing protein {ECO:0000313|EMBL:EJF56347.1} OS=Dichomitus squalens (strain LYAD-421) PE=4 SV=1	DSPc-domain-containing protein [Dichomitus squalens LYAD-421 SS1]
EVM0010853.1	--	K04708|0|dsq:DICSQDRAFT_141226|oxidoreductase; K04708 3-dehydrosphinganine reductase [EC:1.1.1.102] (A)	[Q]	Secondary metabolites biosynthesis, transport and catabolism	short chain dehydrogenase	3-ketodihydrosphingosine reductase TSC10 GN=TSC10 OS=Cryptococcus neoformans var. neoformans serotype D (strain B-3501A) PE=3 SV=1	Oxidoreductase {ECO:0000313|EMBL:EJF56529.1} OS=Dichomitus squalens (strain LYAD-421) PE=4 SV=1	oxidoreductase [Dichomitus squalens LYAD-421 SS1]
EVM0002224.1	--	--	--	--	--	--	Uncharacterized protein {ECO:0000313|EMBL:CDO76980.1} OS=Pycnoporus cinnabarinus (Cinnabar-red polypore) PE=4 SV=1	hypothetical protein DICSQDRAFT_166855 [Dichomitus squalens LYAD-421 SS1]
EVM0011060.1	--	--	--	--	--	--	Uncharacterized protein {ECO:0000313|EMBL:EJF60445.1} OS=Dichomitus squalens (strain LYAD-421) PE=4 SV=1	hypothetical protein DICSQDRAFT_155774 [Dichomitus squalens LYAD-421 SS1]
EVM0004750.1	Cellular Component: integral component of membrane (GO:0016021); Biological Process: transmembrane transport (GO:0055085);	--	[R]	General function prediction only	Major Facilitator Superfamily	Drug resistance protein YOR378W GN=YOR378W OS=Saccharomyces cerevisiae (strain ATCC 204508 / S288c) PE=1 SV=1	MFS general substrate transporter {ECO:0000313|EMBL:EJF60820.1} OS=Dichomitus squalens (strain LYAD-421) PE=4 SV=1	MFS general substrate transporter [Dichomitus squalens LYAD-421 SS1]
EVM0005111.1	Molecular Function: magnesium ion binding (GO:0000287); Molecular Function: phospholipid-translocating ATPase activity (GO:0004012); Molecular Function: ATP binding (GO:0005524); Biological Process: cation transport (GO:0006812); Biological Process: phospholipid transport (GO:0015914); Cellular Component: integral component of membrane (GO:0016021); Molecular Function: cation-transporting ATPase …	K01530|0|dsq:DICSQDRAFT_86233|phospholipid-transporting ATPase 1; K01530 phospholipid-translocating ATPase [EC:3.6.3.1] (A)	[R]	General function prediction only	E1-E2 ATPase	Phospholipid-transporting ATPase DNF1 GN=DNF1 OS=Saccharomyces cerevisiae (strain ATCC 204508 / S288c) PE=1 SV=2	Phospholipid-transporting ATPase 1 {ECO:0000313|EMBL:EJF61625.1} OS=Dichomitus squalens (strain LYAD-421) PE=4 SV=1	phospholipid-transporting ATPase 1 [Dichomitus squalens LYAD-421 SS1]
EVM0001787.1	--	--	--	--	Protein of unknown function (DUF1308)	--	Uncharacterized protein {ECO:0000313|EMBL:EJF56476.1} OS=Dichomitus squalens (strain LYAD-421) PE=4 SV=1	hypothetical protein DICSQDRAFT_130080 [Dichomitus squalens LYAD-421 SS1]
EVM0003364.1	Biological Process: Mo-molybdopterin cofactor biosynthetic process (GO:0006777);	--	[EH]	--	Probable molybdopterin binding domain	Uncharacterized protein YMR178W GN=YMR178W OS=Saccharomyces cerevisiae (strain ATCC 204508 / S288c) PE=1 SV=1	Molybdopterin binding protein {ECO:0000313|EMBL:EJF61805.1} OS=Dichomitus squalens (strain LYAD-421) PE=4 SV=1	Molybdopterin binding protein [Dichomitus squalens LYAD-421 SS1]
EVM0011640.1	--	--	--	--	Protein of unknown function (DUF1115)	--	Uncharacterized protein {ECO:0000313|EMBL:CDO73388.1} OS=Pycnoporus cinnabarinus (Cinnabar-red polypore) PE=4 SV=1	hypothetical protein DICSQDRAFT_165165 [Dichomitus squalens LYAD-421 SS1]
EVM0003498.1	Molecular Function: catalase activity (GO:0004096); Molecular Function: heme binding (GO:0020037); Biological Process: hydrogen peroxide catabolic process (GO:0042744); Molecular Function: metal ion binding (GO:0046872); Biological Process: oxidation-reduction process (GO:0055114);	K03781|0|dsq:DICSQDRAFT_82531|catalase; K03781 catalase [EC:1.11.1.6] (A)	[P]	Inorganic ion transport and metabolism	Catalase	Catalase GN=cta1 OS=Schizosaccharomyces pombe (strain 972 / ATCC 24843) PE=1 SV=1	Catalase {ECO:0000256|RuleBase:RU000498} OS=Pycnoporus cinnabarinus (Cinnabar-red polypore) PE=3 SV=1	catalase [Dichomitus squalens LYAD-421 SS1]
EVM0003803.1	--	--	--	--	Protein of unknown function DUF262	--	Uncharacterized protein {ECO:0000313|EMBL:EJF60922.1} OS=Dichomitus squalens (strain LYAD-421) PE=4 SV=1	hypothetical protein DICSQDRAFT_170779 [Dichomitus squalens LYAD-421 SS1]
EVM0001963.1	--	K01873|0|dsq:DICSQDRAFT_183510|hypothetical protein; K01873 valyl-tRNA synthetase [EC:6.1.1.9] (A)	[J]	Translation, ribosomal structure and biogenesis	tRNA synthetases class I (I, L, M and V)	Valine--tRNA ligase, mitochondrial (Precursor) GN=VAS1 OS=Saccharomyces cerevisiae (strain ATCC 204508 / S288c) PE=1 SV=2	Uncharacterized protein {ECO:0000313|EMBL:EJF56939.1} OS=Dichomitus squalens (strain LYAD-421) PE=3 SV=1	hypothetical protein DICSQDRAFT_183510 [Dichomitus squalens LYAD-421 SS1]
EVM0001456.1	--	--	--	--	--	--	Uncharacterized protein {ECO:0000313|EMBL:EJF56995.1} OS=Dichomitus squalens (strain LYAD-421) PE=4 SV=1	hypothetical protein DICSQDRAFT_183476 [Dichomitus squalens LYAD-421 SS1]
EVM0003062.4	--	--	--	--	--	--	Uncharacterized protein {ECO:0000313|EMBL:EJF60256.1} OS=Dichomitus squalens (strain LYAD-421) PE=4 SV=1	hypothetical protein DICSQDRAFT_137595 [Dichomitus squalens LYAD-421 SS1]
EVM0012278.1	Molecular Function: aminoacyl-tRNA editing activity (GO:0002161); Molecular Function: leucine-tRNA ligase activity (GO:0004823); Molecular Function: ATP binding (GO:0005524); Cellular Component: cytoplasm (GO:0005737); Biological Process: leucyl-tRNA aminoacylation (GO:0006429); Biological Process: regulation of translational fidelity (GO:0006450);	K01869|0|dsq:DICSQDRAFT_138696|leucine-tRNA ligase; K01869 leucyl-tRNA synthetase [EC:6.1.1.4] (A)	[J]	Translation, ribosomal structure and biogenesis	tRNA synthetases class I (I, L, M and V)	Putative leucine--tRNA ligase, cytoplasmic GN=lrs1 OS=Schizosaccharomyces pombe (strain 972 / ATCC 24843) PE=1 SV=1	Leucine-tRNA ligase {ECO:0000313|EMBL:EJF59260.1} OS=Dichomitus squalens (strain LYAD-421) PE=4 SV=1	leucine-tRNA ligase [Dichomitus squalens LYAD-421 SS1]
EVM0005337.1	--	K15165|0|dsq:DICSQDRAFT_179767|hypothetical protein; K15165 mediator of RNA polymerase II transcription subunit 13, fungi type (A)	--	--	Mediator complex subunit 13 C-terminal	Mediator of RNA polymerase II transcription subunit 13 GN=SSN2 OS=Phaeosphaeria nodorum (strain SN15 / ATCC MYA-4574 / FGSC 10173) PE=3 SV=2	Uncharacterized protein {ECO:0000313|EMBL:CDO74204.1} OS=Pycnoporus cinnabarinus (Cinnabar-red polypore) PE=4 SV=1	hypothetical protein DICSQDRAFT_179767 [Dichomitus squalens LYAD-421 SS1]
EVM0002868.1	--	--	[D]	Cell cycle control, cell division, chromosome partitioning	Sad1 / UNC-like C-terminal	Spindle pole body-associated protein sad1 GN=sad1 OS=Schizosaccharomyces pombe (strain 972 / ATCC 24843) PE=1 SV=1	Uncharacterized protein {ECO:0000313|EMBL:CDO77466.1} OS=Pycnoporus cinnabarinus (Cinnabar-red polypore) PE=4 SV=1	hypothetical protein BN946_scf184881.g10 [Trametes cinnabarina]
EVM0012146.1	--	--	--	--	--	--	--	hypothetical protein DICSQDRAFT_166078 [Dichomitus squalens LYAD-421 SS1]
EVM0001889.1	--	K13346|0|dsq:DICSQDRAFT_110114|hypothetical protein; K13346 peroxin-10 (A)	[O]	Posttranslational modification, protein turnover, chaperones	Pex2 / Pex12 amino terminal region	Peroxisome biogenesis factor 10 GN=PEX10 OS=Pichia angusta (Yeast) PE=3 SV=1	Uncharacterized protein {ECO:0000313|EMBL:EJF58420.1} OS=Dichomitus squalens (strain LYAD-421) PE=4 SV=1	hypothetical protein DICSQDRAFT_110114 [Dichomitus squalens LYAD-421 SS1]
EVM0001718.1	--	--	--	--	Ferritin-like domain	Protein rds1 GN=rds1 OS=Schizosaccharomyces pombe (strain 972 / ATCC 24843) PE=2 SV=2	Uncharacterized protein {ECO:0000313|EMBL:KDR71779.1} OS=Galerina marginata CBS 339.88 PE=4 SV=1	hypothetical protein DICSQDRAFT_51824 [Dichomitus squalens LYAD-421 SS1]
EVM0001625.1	--	--	--	--	--	--	Uncharacterized protein {ECO:0000313|EMBL:EMD34252.1} OS=Ceriporiopsis subvermispora (strain B) PE=4 SV=1	hypothetical protein TRAVEDRAFT_99981, partial [Trametes versicolor FP-101664 SS1]
EVM0010790.2	--	--	[UR]	--	Dynamin family	Vacuolar protein sorting-associated protein 1 GN=VPS1 OS=Saccharomyces cerevisiae (strain ATCC 204508 / S288c) PE=1 SV=2	Uncharacterized protein {ECO:0000313|EMBL:EJF57284.1} OS=Dichomitus squalens (strain LYAD-421) PE=4 SV=1	hypothetical protein DICSQDRAFT_111979 [Dichomitus squalens LYAD-421 SS1]
EVM0011657.4	--	--	[R]	General function prediction only	--	--	Uncharacterized protein {ECO:0000313|EMBL:EPS39302.1} OS=Dactylellina haptotyla (strain CBS 200.50) PE=4 SV=1	hypothetical protein OIDMADRAFT_175056 [Oidiodendron maius Zn]
EVM0008744.1	--	--	--	--	--	--	Uncharacterized protein {ECO:0000313|EMBL:EJF61820.1} OS=Dichomitus squalens (strain LYAD-421) PE=4 SV=1	hypothetical protein DICSQDRAFT_59510 [Dichomitus squalens LYAD-421 SS1]
EVM0008620.1	--	K08736|0|shs:STEHIDRAFT_145410|DNA mismatch repair protein MSH3; K08736 DNA mismatch repair protein MSH3 (A)	[L]	Replication, recombination and repair	MutS domain V	DNA mismatch repair protein MSH3 GN=MSH3 OS=Cryptococcus neoformans var. neoformans serotype D (strain JEC21 / PE=3 SV=1	Uncharacterized protein {ECO:0000313|EMBL:CDO74876.1} OS=Pycnoporus cinnabarinus (Cinnabar-red polypore) PE=3 SV=1	hypothetical protein TRAVEDRAFT_57899 [Trametes versicolor FP-101664 SS1]
EVM0011551.1	--	--	--	--	Fungal protein of unknown function (DUF2015)	UPF0357 protein C1687.07 (Precursor) GN=SPAC1687.07 OS=Schizosaccharomyces pombe (strain 972 / ATCC 24843) PE=3 SV=1	Uncharacterized protein {ECO:0000313|EMBL:CCM02574.1} OS=Fibroporia radiculosa (strain TFFH 294) PE=4 SV=1	hypothetical protein DICSQDRAFT_133791 [Dichomitus squalens LYAD-421 SS1]
EVM0004105.1	--	--	--	--	--	--	Uncharacterized protein {ECO:0000313|EMBL:CDO74269.1} OS=Pycnoporus cinnabarinus (Cinnabar-red polypore) PE=4 SV=1	hypothetical protein BN946_scf184646.g3 [Trametes cinnabarina]
EVM0009648.1	Molecular Function: 5-methyltetrahydropteroyltriglutamate-homocysteine S-methyltransferase activity (GO:0003871); Molecular Function: zinc ion binding (GO:0008270); Biological Process: methionine biosynthetic process (GO:0009086); Biological Process: methylation (GO:0032259);	K00549|0|shs:STEHIDRAFT_146356|cobalamin-independent methionine synthase; K00549 5-methyltetrahydropteroyltriglutamate--homocysteine methyltransferase [EC:2.1.1.14] (A)	[E]	Amino acid transport and metabolism	Cobalamin-independent synthase, Catalytic domain	Probable 5-methyltetrahydropteroyltriglutamate--homocysteine methyltransferase GN=met26 OS=Schizosaccharomyces pombe (strain 972 / ATCC 24843) PE=1 SV=1	Uncharacterized protein {ECO:0000313|EMBL:CDO71280.1} OS=Pycnoporus cinnabarinus (Cinnabar-red polypore) PE=3 SV=1	hypothetical protein BN946_scf184908.g37 [Trametes cinnabarina]
EVM0004527.1	Molecular Function: FMN binding (GO:0010181); Molecular Function: oxidoreductase activity (GO:0016491); Molecular Function: heme binding (GO:0020037); Molecular Function: metal ion binding (GO:0046872); Biological Process: oxidation-reduction process (GO:0055114);	K00101|0|dsq:DICSQDRAFT_158371|hypothetical protein; K00101 L-lactate dehydrogenase (cytochrome) [EC:1.1.2.3] (A)	[C]	Energy production and conversion	FMN-dependent dehydrogenase	Cytochrome b2, mitochondrial (Precursor) GN=CYB2 OS=Hansenula anomala (Yeast) PE=1 SV=2	Uncharacterized protein {ECO:0000313|EMBL:CCL99735.1} OS=Fibroporia radiculosa (strain TFFH 294) PE=4 SV=1	hypothetical protein DICSQDRAFT_158371 [Dichomitus squalens LYAD-421 SS1]
EVM0005175.1	Molecular Function: triglyceride lipase activity (GO:0004806); Biological Process: lipid metabolic process (GO:0006629);	--	[I]	Lipid transport and metabolism	Lipase (class 3)	Lipase (Precursor) OS=Rhizopus oryzae (Mucormycosis agent) PE=1 SV=1	Lipase {ECO:0000313|EMBL:EJF56532.1} OS=Dichomitus squalens (strain LYAD-421) PE=4 SV=1	lipase [Dichomitus squalens LYAD-421 SS1]
EVM0001739.1	--	--	--	--	Double-stranded RNA binding motif	--	Uncharacterized protein {ECO:0000313|EMBL:CDO72993.1} OS=Pycnoporus cinnabarinus (Cinnabar-red polypore) PE=4 SV=1	hypothetical protein DICSQDRAFT_47065 [Dichomitus squalens LYAD-421 SS1]
EVM0006654.1	--	--	--	--	--	--	Uncharacterized protein {ECO:0000313|EMBL:EJF56745.1} OS=Dichomitus squalens (strain LYAD-421) PE=4 SV=1	hypothetical protein DICSQDRAFT_70920 [Dichomitus squalens LYAD-421 SS1]
EVM0000183.1	--	--	--	--	--	--	Uncharacterized protein {ECO:0000313|EMBL:KDR79747.1} OS=Galerina marginata CBS 339.88 PE=4 SV=1	hypothetical protein TRAVEDRAFT_124826 [Trametes versicolor FP-101664 SS1]
EVM0004717.4	--	--	--	--	--	--	Uncharacterized protein {ECO:0000313|EMBL:EMD31346.1} OS=Ceriporiopsis subvermispora (strain B) PE=4 SV=1	hypothetical protein DICSQDRAFT_179606 [Dichomitus squalens LYAD-421 SS1]
EVM0009877.1	--	--	--	--	--	--	Uncharacterized protein {ECO:0000313|EMBL:CDO73912.1} OS=Pycnoporus cinnabarinus (Cinnabar-red polypore) PE=4 SV=1	hypothetical protein TRAVEDRAFT_73696 [Trametes versicolor FP-101664 SS1]
EVM0007326.1	--	--	[V]	Defense mechanisms	Dual specificity phosphatase, catalytic domain	Tyrosine-protein phosphatase yvh1 GN=yvh1 OS=Schizosaccharomyces pombe (strain 972 / ATCC 24843) PE=3 SV=1	Uncharacterized protein {ECO:0000313|EMBL:EJF60097.1} OS=Dichomitus squalens (strain LYAD-421) PE=4 SV=1	hypothetical protein DICSQDRAFT_88187 [Dichomitus squalens LYAD-421 SS1]
EVM0006635.1	--	--	[T]	Signal transduction mechanisms	RasGEF domain	Cell division control protein 25 GN=CDC25 OS=Candida albicans (strain SC5314 / ATCC MYA-2876) PE=3 SV=1	Uncharacterized protein {ECO:0000313|EMBL:CDO76099.1} OS=Pycnoporus cinnabarinus (Cinnabar-red polypore) PE=4 SV=1	ras GEF [Dichomitus squalens LYAD-421 SS1]
EVM0005050.1	--	--	--	--	--	Uncharacterized WD repeat-containing protein C4F10.18 GN=SPAC4F10.18 OS=Schizosaccharomyces pombe (strain 972 / ATCC 24843) PE=1 SV=1	Uncharacterized protein {ECO:0000313|EMBL:CDO70585.1} OS=Pycnoporus cinnabarinus (Cinnabar-red polypore) PE=4 SV=1	hypothetical protein DICSQDRAFT_103927 [Dichomitus squalens LYAD-421 SS1]
EVM0002980.1	Molecular Function: peptidase activity (GO:0008233);	--	[O]	Posttranslational modification, protein turnover, chaperones	Peptidase family M48	Mitochondrial metalloendopeptidase OMA1 GN=oma1 OS=Schizosaccharomyces pombe (strain 972 / ATCC 24843) PE=3 SV=1	Uncharacterized protein {ECO:0000313|EMBL:EJF60883.1} OS=Dichomitus squalens (strain LYAD-421) PE=3 SV=1	hypothetical protein DICSQDRAFT_87372 [Dichomitus squalens LYAD-421 SS1]
EVM0001752.1	Molecular Function: structural constituent of ribosome (GO:0003735); Biological Process: translation (GO:0006412); Cellular Component: small ribosomal subunit (GO:0015935);	K02969|2.2238e-83|dsq:DICSQDRAFT_141732|40S ribosomal protein S20; K02969 small subunit ribosomal protein S20e (A)	[J]	Translation, ribosomal structure and biogenesis	Ribosomal protein S10p/S20e	40S ribosomal protein S20 GN=rps20 OS=Schizosaccharomyces pombe (strain 972 / ATCC 24843) PE=1 SV=1	Uncharacterized protein {ECO:0000313|EMBL:CDO76502.1} OS=Pycnoporus cinnabarinus (Cinnabar-red polypore) PE=3 SV=1	40S ribosomal protein S20 [Trametes versicolor FP-101664 SS1]
EVM0004661.2	--	--	[IQ]	--	--	Acyl-coenzyme A oxidase GN=POX1 OS=Ashbya gossypii (strain ATCC 10895 / CBS 109.51 / FGSC 9923 / NRRL PE=3 SV=2	Acyl-CoA dehydrogenase NM domain-like protein {ECO:0000313|EMBL:EJF57783.1} OS=Dichomitus squalens (strain LYAD-421) PE=4 SV=1	acyl-CoA dehydrogenase NM domain-like protein [Dichomitus squalens LYAD-421 SS1]
EVM0004826.1	--	--	--	--	--	--	Uncharacterized protein {ECO:0000313|EMBL:EJF58938.1} (Fragment) OS=Dichomitus squalens (strain LYAD-421) PE=4 SV=1	hypothetical protein TRAVEDRAFT_64792 [Trametes versicolor FP-101664 SS1]
EVM0004790.1	--	--	--	--	F-box-like	--	Uncharacterized protein {ECO:0000313|EMBL:EJF61807.1} OS=Dichomitus squalens (strain LYAD-421) PE=4 SV=1	hypothetical protein DICSQDRAFT_169818 [Dichomitus squalens LYAD-421 SS1]
EVM0010165.1	--	--	--	--	BTB/POZ domain	--	Uncharacterized protein {ECO:0000313|EMBL:EJF58276.1} (Fragment) OS=Dichomitus squalens (strain LYAD-421) PE=4 SV=1	hypothetical protein DICSQDRAFT_17217, partial [Dichomitus squalens LYAD-421 SS1]
EVM0000177.1	--	--	[A]	RNA processing and modification	--	Guanine nucleotide-binding protein subunit beta GN=GB-1 OS=Cryphonectria parasitica (Chesnut blight fungus) PE=3 SV=1	Uncharacterized protein {ECO:0000313|EMBL:CDO74500.1} OS=Pycnoporus cinnabarinus (Cinnabar-red polypore) PE=4 SV=1	hypothetical protein DICSQDRAFT_100114 [Dichomitus squalens LYAD-421 SS1]
EVM0011765.1	--	K03353|0|dsq:DICSQDRAFT_133413|TPR-like protein; K03353 anaphase-promoting complex subunit 6 (A)	[DO]	--	Tetratricopeptide repeat	Anaphase-promoting complex subunit cut9 GN=cut9 OS=Schizosaccharomyces pombe (strain 972 / ATCC 24843) PE=1 SV=2	Uncharacterized protein {ECO:0000313|EMBL:CDO75164.1} OS=Pycnoporus cinnabarinus (Cinnabar-red polypore) PE=4 SV=1	TPR-like protein [Dichomitus squalens LYAD-421 SS1]
EVM0006170.1	Molecular Function: peptidase activity (GO:0008233);	--	--	--	Subtilase family	Subtilisin-like protease 10 (Precursor) GN=SUB10 OS=Arthroderma benhamiae (strain ATCC MYA-4681 / CBS 112371) PE=3 SV=2	Subtilisin-like protease {ECO:0000313|EMBL:EJF57652.1} OS=Dichomitus squalens (strain LYAD-421) PE=3 SV=1	subtilisin-like protease [Dichomitus squalens LYAD-421 SS1]
EVM0002983.1	--	--	--	--	--	--	Uncharacterized protein {ECO:0000313|EMBL:CDO76890.1} OS=Pycnoporus cinnabarinus (Cinnabar-red polypore) PE=4 SV=1	hypothetical protein BN946_scf184903.g11 [Trametes cinnabarina]
EVM0000741.1	--	--	--	--	--	--	Uncharacterized protein {ECO:0000313|EMBL:EJF59441.1} OS=Dichomitus squalens (strain LYAD-421) PE=4 SV=1	hypothetical protein DICSQDRAFT_138570 [Dichomitus squalens LYAD-421 SS1]
EVM0007337.1	Molecular Function: metal ion binding (GO:0046872);	K18932|0|dsq:DICSQDRAFT_139252|hypothetical protein; K18932 palmitoyltransferase [EC:2.3.1.225] (A)	[R]	General function prediction only	DHHC palmitoyltransferase	Palmitoyltransferase pfa3 GN=ptr-3 OS=Neurospora crassa (strain ATCC 24698 / 74-OR23-1A / CBS 708.71 / DSM PE=3 SV=3	Palmitoyltransferase {ECO:0000256|RuleBase:RU079119} OS=Dichomitus squalens (strain LYAD-421) PE=3 SV=1	hypothetical protein DICSQDRAFT_139252 [Dichomitus squalens LYAD-421 SS1]
EVM0013146.2	--	K01539|0|dsq:DICSQDRAFT_161018|aminophospholipid-transporting P-type ATPase; K01539 sodium/potassium-transporting ATPase subunit alpha [EC:3.6.3.9] (A)	[P]	Inorganic ion transport and metabolism	E1-E2 ATPase	Calcium-transporting ATPase 1 GN=G1666 OS=Saccharomyces cerevisiae (strain ATCC 204508 / S288c) PE=1 SV=1	Uncharacterized protein {ECO:0000313|EMBL:CDO71883.1} OS=Pycnoporus cinnabarinus (Cinnabar-red polypore) PE=4 SV=1	aminophospholipid-transporting P-type ATPase [Dichomitus squalens LYAD-421 SS1]
EVM0011863.1	Molecular Function: binding (GO:0005488); Molecular Function: oxidoreductase activity (GO:0016491);	--	[QI]	--	Cytochrome P450	Cytochrome P450 52A11 GN=CYP52A11 OS=Candida maltosa (Yeast) PE=2 SV=1	Cytochrome P450 {ECO:0000313|EMBL:EJF60062.1} OS=Dichomitus squalens (strain LYAD-421) PE=3 SV=1	cytochrome P450 [Trametes versicolor FP-101664 SS1]
EVM0011568.1	--	--	--	--	--	--	Uncharacterized protein {ECO:0000313|EMBL:EIW51828.1} OS=Trametes versicolor (strain FP-101664) PE=4 SV=1	hypothetical protein TRAVEDRAFT_49590 [Trametes versicolor FP-101664 SS1]
EVM0006484.1	--	--	--	--	--	--	Uncharacterized protein {ECO:0000313|EMBL:EMD38190.1} OS=Ceriporiopsis subvermispora (strain B) PE=4 SV=1	hypothetical protein DICSQDRAFT_98049 [Dichomitus squalens LYAD-421 SS1]
EVM0009654.1	Biological Process: DNA replication initiation (GO:0006270);	K06628|0|dsq:DICSQDRAFT_50152|CDC45-like protein; K06628 cell division control protein 45 (A)	[L]	Replication, recombination and repair	CDC45-like protein	Protein TSD2 GN=TSD2 OS=Ustilago maydis (strain 521 / FGSC 9021) PE=2 SV=1	Uncharacterized protein {ECO:0000313|EMBL:CDO72870.1} OS=Pycnoporus cinnabarinus (Cinnabar-red polypore) PE=4 SV=1	CDC45-like protein [Dichomitus squalens LYAD-421 SS1]
EVM0008932.1	--	--	[L]	Replication, recombination and repair	--	DNA repair protein rhp9 GN=rhp9 OS=Schizosaccharomyces pombe (strain 972 / ATCC 24843) PE=1 SV=1	Uncharacterized protein {ECO:0000313|EMBL:CDO68291.1} OS=Pycnoporus cinnabarinus (Cinnabar-red polypore) PE=4 SV=1	hypothetical protein DICSQDRAFT_77708 [Dichomitus squalens LYAD-421 SS1]
EVM0003907.1	--	--	--	--	--	--	Uncharacterized protein {ECO:0000313|EMBL:CDO77543.1} OS=Pycnoporus cinnabarinus (Cinnabar-red polypore) PE=4 SV=1	hypothetical protein DICSQDRAFT_132050 [Dichomitus squalens LYAD-421 SS1]
EVM0011386.1	--	--	[I]	Lipid transport and metabolism	Alpha/beta hydrolase family	Uncharacterized hydrolase YNR064C GN=YNR064C OS=Saccharomyces cerevisiae (strain ATCC 204508 / S288c) PE=3 SV=1	Uncharacterized protein {ECO:0000313|EMBL:CDO71496.1} OS=Pycnoporus cinnabarinus (Cinnabar-red polypore) PE=4 SV=1	alpha/beta-hydrolase [Dichomitus squalens LYAD-421 SS1]
EVM0007422.1	--	--	--	--	--	--	Uncharacterized protein {ECO:0000313|EMBL:EJF59649.1} OS=Dichomitus squalens (strain LYAD-421) PE=4 SV=1	hypothetical protein DICSQDRAFT_148366 [Dichomitus squalens LYAD-421 SS1]
EVM0005912.1	--	--	--	--	F-box-like	--	Uncharacterized protein {ECO:0000313|EMBL:EJF61080.1} OS=Dichomitus squalens (strain LYAD-421) PE=4 SV=1	hypothetical protein DICSQDRAFT_181036 [Dichomitus squalens LYAD-421 SS1]
EVM0005338.1	--	--	--	--	--	--	Predicted protein {ECO:0000313|EMBL:EDR05516.1} OS=Laccaria bicolor (strain S238N-H82 / ATCC MYA-4686) PE=4 SV=1	hypothetical protein TRAVEDRAFT_45119 [Trametes versicolor FP-101664 SS1]
EVM0000673.1	--	K01279|0|dsq:DICSQDRAFT_93881|subtilisin-like protein; K01279 tripeptidyl-peptidase I [EC:3.4.14.9] (A)	--	--	Pro-kumamolisin, activation domain	Tripeptidyl-peptidase sed3 (Precursor) GN=sed3 OS=Neosartorya fumigata (strain ATCC MYA-4609 / Af293 / CBS 101355 / FGSC PE=1 SV=1	Subtilisin-like protein {ECO:0000313|EMBL:EJF56247.1} OS=Dichomitus squalens (strain LYAD-421) PE=4 SV=1	subtilisin-like protein [Dichomitus squalens LYAD-421 SS1]
EVM0004809.3	--	--	[DO]	--	Caspase domain	Metacaspase-1 (Precursor) GN=MCA1 OS=Ustilago maydis (strain 521 / FGSC 9021) PE=3 SV=1	Uncharacterized protein {ECO:0000313|EMBL:CDO69207.1} OS=Pycnoporus cinnabarinus (Cinnabar-red polypore) PE=4 SV=1	hypothetical protein DICSQDRAFT_178067 [Dichomitus squalens LYAD-421 SS1]
EVM0009761.1	--	--	--	--	Peptide N-acetyl-beta-D-glucosaminyl asparaginase amidase A	--	Uncharacterized protein {ECO:0000313|EMBL:CDO72908.1} OS=Pycnoporus cinnabarinus (Cinnabar-red polypore) PE=4 SV=1	hypothetical protein DICSQDRAFT_177432 [Dichomitus squalens LYAD-421 SS1]
EVM0001767.1	--	--	--	--	--	--	Predicted protein {ECO:0000313|EMBL:EED84591.1} OS=Postia placenta (strain ATCC 44394 / Madison 698-R) PE=4 SV=1	hypothetical protein TRAVEDRAFT_51822 [Trametes versicolor FP-101664 SS1]
EVM0011351.1	--	--	--	--	--	--	Uncharacterized protein {ECO:0000313|EMBL:EJF56835.1} OS=Dichomitus squalens (strain LYAD-421) PE=4 SV=1	hypothetical protein DICSQDRAFT_112506 [Dichomitus squalens LYAD-421 SS1]
EVM0008358.1	Molecular Function: hydrolase activity (GO:0016787);	K01187|1.21653e-165|dsq:DICSQDRAFT_110931|alpha-glucosidase; K01187 alpha-glucosidase [EC:3.2.1.20] (A)	[G]	Carbohydrate transport and metabolism	Glycosyl hydrolases family 31	Probable alpha/beta-glucosidase agdC (Precursor) GN=agdC OS=Aspergillus clavatus (strain ATCC 1007 / CBS 513.65 / DSM 816 / NCTC PE=3 SV=1	Alpha-glucosidase {ECO:0000313|EMBL:EJF58019.1} OS=Dichomitus squalens (strain LYAD-421) PE=3 SV=1	alpha-glucosidase [Dichomitus squalens LYAD-421 SS1]
EVM0004710.1	--	--	--	--	--	--	Uncharacterized protein {ECO:0000313|EMBL:EJF59126.1} (Fragment) OS=Dichomitus squalens (strain LYAD-421) PE=4 SV=1	hypothetical protein DICSQDRAFT_65575, partial [Dichomitus squalens LYAD-421 SS1]
EVM0010475.1	--	--	--	--	--	--	Uncharacterized protein {ECO:0000313|EMBL:EJF57602.1} OS=Dichomitus squalens (strain LYAD-421) PE=4 SV=1	hypothetical protein DICSQDRAFT_183125 [Dichomitus squalens LYAD-421 SS1]
EVM0009115.2	Molecular Function: binding (GO:0005488);	--	[R]	General function prediction only	--	Metallothionein expression activator GN=ACE2 OS=Saccharomyces cerevisiae (strain ATCC 204508 / S288c) PE=1 SV=1	Uncharacterized protein {ECO:0000313|EMBL:EJF55799.1} OS=Dichomitus squalens (strain LYAD-421) PE=4 SV=1	hypothetical protein DICSQDRAFT_164134 [Dichomitus squalens LYAD-421 SS1]
EVM0007866.1	--	K07359|0|dsq:DICSQDRAFT_53075|kinase-like protein; K07359 calcium/calmodulin-dependent protein kinase kinase [EC:2.7.11.17] (A)	[T]	Signal transduction mechanisms	Protein kinase domain	Serine/threonine-protein kinase ssp1 GN=ssp1 OS=Schizosaccharomyces pombe (strain 972 / ATCC 24843) PE=1 SV=1	Uncharacterized protein {ECO:0000313|EMBL:CDO70636.1} OS=Pycnoporus cinnabarinus (Cinnabar-red polypore) PE=4 SV=1	hypothetical protein BN946_scf184756.g2 [Trametes cinnabarina]
EVM0013027.2	--	--	[QI]	--	Cytochrome P450	Cytochrome P450 67 (Fragment) GN=CYP67 OS=Uromyces fabae (Rust fungus) PE=2 SV=1	Cytochrome P450 {ECO:0000313|EMBL:EJF56531.1} OS=Dichomitus squalens (strain LYAD-421) PE=3 SV=1	cytochrome P450 [Dichomitus squalens LYAD-421 SS1]
EVM0004470.1	--	--	[R]	General function prediction only	Integrase core domain	Integrase p49 GN=TY3B-I OS=Saccharomyces cerevisiae (strain ATCC 204508 / S288c) PE=3 SV=2	Putative Ty3/Gypsy polyprotein/retrotransposon {ECO:0000313|EMBL:KEP46697.1} OS=Rhizoctonia solani 123E PE=4 SV=1	hypothetical protein PISMIDRAFT_17126 [Pisolithus microcarpus 441]
EVM0000144.1	--	--	[OT]	--	Ankyrin repeats (3 copies)	Palmitoyltransferase akr1 GN=ptr-1 OS=Neurospora crassa (strain ATCC 24698 / 74-OR23-1A / CBS 708.71 / DSM PE=3 SV=2	Uncharacterized protein {ECO:0000313|EMBL:EJF57863.1} OS=Dichomitus squalens (strain LYAD-421) PE=4 SV=1	hypothetical protein DICSQDRAFT_149470 [Dichomitus squalens LYAD-421 SS1]
EVM0003349.1	--	--	--	--	--	--	Uncharacterized protein {ECO:0000313|EMBL:EJF55559.1} OS=Dichomitus squalens (strain LYAD-421) PE=4 SV=1	hypothetical protein DICSQDRAFT_130562 [Dichomitus squalens LYAD-421 SS1]
EVM0012186.1	--	K00773|0|dsq:DICSQDRAFT_154354|tRNA-guanine transglycosylase; K00773 queuine tRNA-ribosyltransferase [EC:2.4.2.29] (A)	[A]	RNA processing and modification	Queuine tRNA-ribosyltransferase	Queuine tRNA-ribosyltransferase-like protein GN=SPAC2F3.13c OS=Schizosaccharomyces pombe (strain 972 / ATCC 24843) PE=3 SV=4	Uncharacterized protein {ECO:0000313|EMBL:CDO69005.1} OS=Pycnoporus cinnabarinus (Cinnabar-red polypore) PE=4 SV=1	hypothetical protein TRAVEDRAFT_118499 [Trametes versicolor FP-101664 SS1]
EVM0001827.1	--	--	--	--	--	--	Uncharacterized protein {ECO:0000313|EMBL:KDQ29793.1} OS=Pleurotus ostreatus PC15 PE=4 SV=1	hypothetical protein K443DRAFT_13876, partial [Laccaria amethystina LaAM-08-1]
EVM0005696.1	Molecular Function: ion channel activity (GO:0005216); Biological Process: ion transport (GO:0006811); Cellular Component: integral component of membrane (GO:0016021); Biological Process: transmembrane transport (GO:0055085);	--	--	--	Ion transport protein	--	Uncharacterized protein {ECO:0000313|EMBL:EMD41892.1} (Fragment) OS=Ceriporiopsis subvermispora (strain B) PE=4 SV=1	hypothetical protein DICSQDRAFT_46431 [Dichomitus squalens LYAD-421 SS1]
EVM0002231.1	--	--	--	--	RNA polymerase II transcription elongation factor	Ell1-associated factor 1 GN=eaf1 OS=Schizosaccharomyces pombe (strain 972 / ATCC 24843) PE=1 SV=1	Uncharacterized protein {ECO:0000313|EMBL:CDO74118.1} OS=Pycnoporus cinnabarinus (Cinnabar-red polypore) PE=4 SV=1	hypothetical protein DICSQDRAFT_154241 [Dichomitus squalens LYAD-421 SS1]
EVM0000370.1	--	--	--	--	Eukaryotic aspartyl protease	Rhizopuspepsin-1 (Precursor) GN=RNAP OS=Rhizopus niveus PE=1 SV=1	Uncharacterized protein {ECO:0000313|EMBL:CDO77331.1} OS=Pycnoporus cinnabarinus (Cinnabar-red polypore) PE=3 SV=1	acid protease [Dichomitus squalens LYAD-421 SS1]
EVM0001216.1	--	--	[S]	Function unknown	SNARE associated Golgi protein	Golgi apparatus membrane protein TVP38 GN=TVP38 OS=Podospora anserina (strain S / ATCC MYA-4624 / DSM 980 / FGSC 10383) PE=3 SV=1	Uncharacterized protein {ECO:0000313|EMBL:EJF56011.1} OS=Dichomitus squalens (strain LYAD-421) PE=4 SV=1	hypothetical protein DICSQDRAFT_164046 [Dichomitus squalens LYAD-421 SS1]
EVM0010787.1	Molecular Function: catalytic activity (GO:0003824); Biological Process: metabolic process (GO:0008152);	K09704|0|dsq:DICSQDRAFT_168647|hypothetical protein; K09704 hypothetical protein (A)	--	--	Protein of unknown function (DUF1237)	Meiotically up-regulated gene 157 protein GN=mug157 OS=Schizosaccharomyces pombe (strain 972 / ATCC 24843) PE=1 SV=1	Duf1237 domain protein {ECO:0000313|EMBL:ESK97428.1} OS=Moniliophthora roreri (strain MCA 2997) PE=4 SV=1	hypothetical protein DICSQDRAFT_168647 [Dichomitus squalens LYAD-421 SS1]
EVM0010324.1	Cellular Component: integral component of membrane (GO:0016021); Molecular Function: substrate-specific transmembrane transporter activity (GO:0022891); Biological Process: transmembrane transport (GO:0055085);	--	[R]	General function prediction only	Sugar (and other) transporter	Sugar transporter STL1 GN=STL1 OS=Saccharomyces cerevisiae (strain ATCC 204508 / S288c) PE=1 SV=2	Uncharacterized protein {ECO:0000313|EMBL:EKV51641.1} OS=Agaricus bisporus var. bisporus (strain H97 / ATCC MYA-4626 / FGSC PE=3 SV=1	hypothetical protein AGABI2DRAFT_197967 [Agaricus bisporus var. bisporus H97]
EVM0001142.1	--	K14800|7.97225e-57|psq:PUNSTDRAFT_108435|hypothetical protein; K14800 pre-rRNA-processing protein TSR2 (A)	[S]	Function unknown	Pre-rRNA-processing protein TSR2	Pre-rRNA-processing protein TSR2 OS=Saccharomyces cerevisiae (strain ATCC 204508 / S288c) PE=1 SV=2	Uncharacterized protein {ECO:0000313|EMBL:CDO70311.1} OS=Pycnoporus cinnabarinus (Cinnabar-red polypore) PE=4 SV=1	hypothetical protein BN946_scf184370.g12 [Trametes cinnabarina]
EVM0010284.5	--	--	--	--	HPC2 and ubinuclein domain	Histone promoter control protein 2 GN=hpc2 OS=Schizosaccharomyces pombe (strain 972 / ATCC 24843) PE=1 SV=1	Uncharacterized protein {ECO:0000313|EMBL:EJF61353.1} OS=Dichomitus squalens (strain LYAD-421) PE=4 SV=1	hypothetical protein DICSQDRAFT_180666 [Dichomitus squalens LYAD-421 SS1]
EVM0006725.1	Molecular Function: ATP binding (GO:0005524); Cellular Component: cytoplasm (GO:0005737); Molecular Function: nucleoside-triphosphatase activity (GO:0017111); Biological Process: protein catabolic process (GO:0030163);	K03061|0|dsq:DICSQDRAFT_179837|26S proteasome subunit P45; K03061 26S proteasome regulatory subunit T1 (A)	[O]	Posttranslational modification, protein turnover, chaperones	ATPase family associated with various cellular activities (AAA)	26S protease regulatory subunit 7 homolog GN=rpt1 OS=Schizosaccharomyces pombe (strain 972 / ATCC 24843) PE=1 SV=2	Uncharacterized protein {ECO:0000313|EMBL:EMD38696.1} OS=Ceriporiopsis subvermispora (strain B) PE=3 SV=1	26S proteasome subunit P45 [Dichomitus squalens LYAD-421 SS1]
EVM0012342.1	--	--	--	--	--	--	Uncharacterized protein {ECO:0000313|EMBL:EJF61979.1} OS=Dichomitus squalens (strain LYAD-421) PE=4 SV=1	hypothetical protein DICSQDRAFT_180335 [Dichomitus squalens LYAD-421 SS1]
EVM0007205.1	--	--	--	--	--	--	Uncharacterized protein {ECO:0000313|EMBL:EJF59376.1} (Fragment) OS=Dichomitus squalens (strain LYAD-421) PE=4 SV=1	hypothetical protein DICSQDRAFT_89496, partial [Dichomitus squalens LYAD-421 SS1]
EVM0008968.1	--	--	--	--	--	--	Uncharacterized protein {ECO:0000313|EMBL:CDO70790.1} OS=Pycnoporus cinnabarinus (Cinnabar-red polypore) PE=4 SV=1	hypothetical protein DICSQDRAFT_131973 [Dichomitus squalens LYAD-421 SS1]
EVM0003647.1	Biological Process: dephosphorylation (GO:0016311); Molecular Function: phosphatase activity (GO:0016791);	--	[T]	Signal transduction mechanisms	Protein-tyrosine phosphatase	Tyrosine-protein phosphatase 2 GN=pyp2 OS=Schizosaccharomyces pombe (strain 972 / ATCC 24843) PE=1 SV=1	Uncharacterized protein {ECO:0000313|EMBL:CDO69835.1} OS=Pycnoporus cinnabarinus (Cinnabar-red polypore) PE=4 SV=1	hypothetical protein BN946_scf184803.g33 [Trametes cinnabarina]
EVM0008713.1	Molecular Function: ATPase activator activity (GO:0001671); Biological Process: response to stress (GO:0006950); Biological Process: positive regulation of ATPase activity (GO:0032781); Molecular Function: chaperone binding (GO:0051087);	--	[S]	Function unknown	Activator of Hsp90 ATPase, N-terminal	Uncharacterized protein C1711.08 GN=SPBC1711.08 OS=Schizosaccharomyces pombe (strain 972 / ATCC 24843) PE=2 SV=1	Uncharacterized protein {ECO:0000313|EMBL:CDO70015.1} OS=Pycnoporus cinnabarinus (Cinnabar-red polypore) PE=4 SV=1	hypothetical protein DICSQDRAFT_78669 [Dichomitus squalens LYAD-421 SS1]
EVM0002560.1	Cellular Component: ribosome (GO:0005840);	--	--	--	Mitochondrial ribosomal protein L31	54S ribosomal protein L31, mitochondrial (Precursor) GN=mrpl31 OS=Schizosaccharomyces pombe (strain 972 / ATCC 24843) PE=3 SV=1	Uncharacterized protein {ECO:0000313|EMBL:CDO70701.1} OS=Pycnoporus cinnabarinus (Cinnabar-red polypore) PE=4 SV=1	mitochondrial ribosomal protein L31 [Dichomitus squalens LYAD-421 SS1]
EVM0002211.1	--	--	[O]	Posttranslational modification, protein turnover, chaperones	Gamma interferon inducible lysosomal thiol reductase (GILT)	--	Uncharacterized protein {ECO:0000313|EMBL:EJF61129.1} OS=Dichomitus squalens (strain LYAD-421) PE=4 SV=1	hypothetical protein DICSQDRAFT_106087 [Dichomitus squalens LYAD-421 SS1]
EVM0006404.2	--	--	--	--	--	--	Uncharacterized protein {ECO:0000313|EMBL:EJF56656.1} OS=Dichomitus squalens (strain LYAD-421) PE=4 SV=1	hypothetical protein DICSQDRAFT_183699 [Dichomitus squalens LYAD-421 SS1]
EVM0003285.1	Biological Process: cellulose catabolic process (GO:0030245); Molecular Function: cellobiose glucosidase activity (GO:0080079);	K01188|0|dsq:DICSQDRAFT_64087|beta-glucosidase; K01188 beta-glucosidase [EC:3.2.1.21] (A)	[G]	Carbohydrate transport and metabolism	Glycosyl hydrolase family 1	Beta-glucosidase 1B {ECO:0000303|PubMed:16896601, ECO:0000312|EMBL:BAE87009.1} OS=Phanerochaete chrysosporium (White-rot fungus) PE=1 SV=1	Beta-glucosidase {ECO:0000313|EMBL:EJF59931.1} OS=Dichomitus squalens (strain LYAD-421) PE=3 SV=1	beta-glucosidase [Dichomitus squalens LYAD-421 SS1]
EVM0013325.1	Molecular Function: glycine hydroxymethyltransferase activity (GO:0004372); Biological Process: glycine metabolic process (GO:0006544); Biological Process: L-serine metabolic process (GO:0006563); Molecular Function: pyridoxal phosphate binding (GO:0030170); Biological Process: tetrahydrofolate interconversion (GO:0035999);	K00600|0|dsq:DICSQDRAFT_178906|SHMT-domain-containing protein; K00600 glycine hydroxymethyltransferase [EC:2.1.2.1] (A)	[E]	Amino acid transport and metabolism	Serine hydroxymethyltransferase	Serine hydroxymethyltransferase, cytosolic GN=SHM2 OS=Ashbya gossypii (strain ATCC 10895 / CBS 109.51 / FGSC 9923 / NRRL PE=3 SV=2	Serine hydroxymethyltransferase {ECO:0000256|RuleBase:RU000585} OS=Pycnoporus cinnabarinus (Cinnabar-red polypore) PE=3 SV=1	SHMT-domain-containing protein, partial [Dichomitus squalens LYAD-421 SS1]
EVM0005808.1	--	K17989|0|dsq:DICSQDRAFT_77355|tryptophan synthase beta subunit-like PLP-dependent enzyme; K17989 L-serine/L-threonine ammonia-lyase [EC:4.3.1.17 4.3.1.19] (A)	[E]	Amino acid transport and metabolism	Pyridoxal-phosphate dependent enzyme	L-threonine dehydratase GN=CHA1 OS=Saccharomyces cerevisiae (strain ATCC 204508 / S288c) PE=1 SV=2	Uncharacterized protein {ECO:0000313|EMBL:CDO70689.1} OS=Pycnoporus cinnabarinus (Cinnabar-red polypore) PE=4 SV=1	tryptophan synthase beta subunit-like PLP-dependent enzyme [Dichomitus squalens LYAD-421 SS1]
EVM0011142.1	Molecular Function: binding (GO:0005488);	K10403|0|dsq:DICSQDRAFT_158066|kinesin-domain-containing protein; K10403 kinesin family member 22 (A)	[Z]	Cytoskeleton	Kinesin motor domain	Kinesin heavy chain GN=kin OS=Neurospora crassa (strain ATCC 24698 / 74-OR23-1A / CBS 708.71 / DSM PE=1 SV=2	Kinesin-like protein {ECO:0000256|RuleBase:RU000394} OS=Dichomitus squalens (strain LYAD-421) PE=3 SV=1	kinesin-domain-containing protein [Dichomitus squalens LYAD-421 SS1]
EVM0007848.1	Molecular Function: transferase activity, transferring glycosyl groups (GO:0016757);	K00729|0|dsq:DICSQDRAFT_139671|glycosyltransferase family 2 protein; K00729 dolichyl-phosphate beta-glucosyltransferase [EC:2.4.1.117] (A)	[R]	General function prediction only	Glycosyl transferase family 2	Dolichyl-phosphate beta-glucosyltransferase GN=alg5 OS=Schizosaccharomyces pombe (strain 972 / ATCC 24843) PE=3 SV=1	Glycosyltransferase family 2 protein {ECO:0000313|EMBL:EJF58047.1} OS=Dichomitus squalens (strain LYAD-421) PE=4 SV=1	glycosyltransferase family 2 protein [Dichomitus squalens LYAD-421 SS1]
EVM0004773.2	--	--	--	--	--	--	Uncharacterized protein {ECO:0000313|EMBL:CCM03780.1} OS=Fibroporia radiculosa (strain TFFH 294) PE=4 SV=1	hypothetical protein DICSQDRAFT_164934 [Dichomitus squalens LYAD-421 SS1]
EVM0008293.1	Molecular Function: ligase activity (GO:0016874);	K10583|1.09015e-164|dsq:DICSQDRAFT_90253|hypothetical protein; K10583 ubiquitin-conjugating enzyme E2 S [EC:6.3.2.19] (A)	[O]	Posttranslational modification, protein turnover, chaperones	Ubiquitin-conjugating enzyme	Ubiquitin-conjugating enzyme E2 2 GN=UBC2 OS=Yarrowia lipolytica (strain CLIB 122 / E 150) PE=3 SV=1	Uncharacterized protein {ECO:0000313|EMBL:EJF58669.1} OS=Dichomitus squalens (strain LYAD-421) PE=3 SV=1	hypothetical protein DICSQDRAFT_90253 [Dichomitus squalens LYAD-421 SS1]
EVM0012363.1	--	K00480|0|dsq:DICSQDRAFT_56941|FAD/NAD(P)-binding domain-containing protein; K00480 salicylate hydroxylase [EC:1.14.13.1] (A)	[CR]	--	FAD binding domain	--	Uncharacterized protein {ECO:0000313|EMBL:CDO74180.1} OS=Pycnoporus cinnabarinus (Cinnabar-red polypore) PE=4 SV=1	FAD/NAD(P)-binding domain-containing protein [Dichomitus squalens LYAD-421 SS1]
EVM0006248.1	--	--	--	--	--	--	Uncharacterized protein {ECO:0000313|EMBL:KDQ63889.1} OS=Jaapia argillacea MUCL 33604 PE=4 SV=1	hypothetical protein JAAARDRAFT_43187 [Jaapia argillacea MUCL 33604]
EVM0004283.1	--	--	[T]	Signal transduction mechanisms	Protein kinase domain	Casein kinase I homolog 2 GN=cki2 OS=Schizosaccharomyces pombe (strain 972 / ATCC 24843) PE=1 SV=2	Putative uncharacterized protein {ECO:0000313|EMBL:EFJ01358.1} (Fragment) OS=Schizophyllum commune (strain H4-8 / FGSC 9210) PE=4 SV=1	hypothetical protein SCHCODRAFT_106159 [Schizophyllum commune H4-8]
EVM0010797.1	--	K17362|1.54279e-57|dsq:DICSQDRAFT_78749|hypothetical protein; K17362 acyl-coenzyme A thioesterase 13 [EC:3.1.2.-] (A)	[R]	General function prediction only	Thioesterase superfamily	--	Uncharacterized protein {ECO:0000313|EMBL:CDO68680.1} OS=Pycnoporus cinnabarinus (Cinnabar-red polypore) PE=4 SV=1	hypothetical protein TRAVEDRAFT_117358 [Trametes versicolor FP-101664 SS1]
EVM0000760.2	--	--	--	--	--	--	Uncharacterized protein {ECO:0000313|EMBL:EJF57354.1} OS=Dichomitus squalens (strain LYAD-421) PE=4 SV=1	hypothetical protein DICSQDRAFT_92317 [Dichomitus squalens LYAD-421 SS1]
EVM0010083.1	Molecular Function: nucleotide binding (GO:0000166); Biological Process: transport (GO:0006810); Biological Process: cellular process (GO:0009987); Molecular Function: ATPase activity (GO:0016887);	--	[Q]	Secondary metabolites biosynthesis, transport and catabolism	ABC transporter	ATP-dependent bile acid permease GN=YBT1 OS=Saccharomyces cerevisiae (strain ATCC 204508 / S288c) PE=1 SV=2	Multidrug resistance-associated ABC transporter {ECO:0000313|EMBL:EJF59299.1} OS=Dichomitus squalens (strain LYAD-421) PE=3 SV=1	multidrug resistance-associated ABC transporter [Dichomitus squalens LYAD-421 SS1]
EVM0006877.1	Molecular Function: nucleotide binding (GO:0000166);	K14328|6.68066e-156|dsq:DICSQDRAFT_136334|hypothetical protein; K14328 regulator of nonsense transcripts 3 (A)	[A]	RNA processing and modification	Smg-4/UPF3 family	Nonsense-mediated mRNA decay protein 3 GN=upf3 OS=Schizosaccharomyces pombe (strain 972 / ATCC 24843) PE=3 SV=1	Uncharacterized protein {ECO:0000313|EMBL:EJF61829.1} OS=Dichomitus squalens (strain LYAD-421) PE=4 SV=1	hypothetical protein DICSQDRAFT_136334 [Dichomitus squalens LYAD-421 SS1]
EVM0003511.1	--	--	--	--	--	Calcium channel YVC1 {ECO:0000305} OS=Candida albicans (strain SC5314 / ATCC MYA-2876) PE=2 SV=1	Calcium activated cation channel {ECO:0000313|EMBL:EJF62394.1} OS=Dichomitus squalens (strain LYAD-421) PE=4 SV=1	calcium activated cation channel [Dichomitus squalens LYAD-421 SS1]
EVM0009455.1	--	--	--	--	--	--	Uncharacterized protein {ECO:0000313|EMBL:CDO73268.1} OS=Pycnoporus cinnabarinus (Cinnabar-red polypore) PE=4 SV=1	hypothetical protein DICSQDRAFT_32336, partial [Dichomitus squalens LYAD-421 SS1]
EVM0008706.1	--	--	--	--	--	--	Uncharacterized protein {ECO:0000313|EMBL:EPQ50156.1} OS=Gloeophyllum trabeum (strain ATCC 11539 / FP-39264 / Madison 617) PE=4 SV=1	hypothetical protein TRAVEDRAFT_24525 [Trametes versicolor FP-101664 SS1]
EVM0009275.1	Biological Process: nuclear-transcribed mRNA catabolic process (GO:0000956); Molecular Function: nucleic acid binding (GO:0003676); Cellular Component: intracellular (GO:0005622); Molecular Function: 5'-3' exonuclease activity (GO:0008409);	K12618|0|cci:CC1G_11892|exonuclease II; K12618 5'-3' exoribonuclease 1 [EC:3.1.13.-] (A)	[LD]	--	XRN 5'-3' exonuclease N-terminus	5&apos;-3&apos; exoribonuclease 1 GN=exo2 OS=Schizosaccharomyces pombe (strain 972 / ATCC 24843) PE=1 SV=1	5&apos;-3&apos; exoribonuclease 1 {ECO:0000256|PIRNR:PIRNR006743} OS=Pycnoporus cinnabarinus (Cinnabar-red polypore) PE=3 SV=1	hypothetical protein BN946_scf184828.g6 [Trametes cinnabarina]
EVM0010940.1	--	--	--	--	Terpene synthase family, metal binding domain	Delta(6)-protoilludene synthase GN=PRO1 OS=Armillaria gallica (Bulbous honey fungus) PE=1 SV=1	Terpenoid synthase {ECO:0000313|EMBL:EPQ52430.1} OS=Gloeophyllum trabeum (strain ATCC 11539 / FP-39264 / Madison 617) PE=4 SV=1	hypothetical protein HYDPIDRAFT_90513 [Hydnomerulius pinastri MD-312]
EVM0010826.1	--	--	--	--	Arrestin (or S-antigen), N-terminal domain	--	Uncharacterized protein {ECO:0000313|EMBL:EJF59893.1} OS=Dichomitus squalens (strain LYAD-421) PE=4 SV=1	hypothetical protein DICSQDRAFT_64042 [Dichomitus squalens LYAD-421 SS1]
EVM0005231.1	--	K11375|0|dsq:DICSQDRAFT_95998|PAXNEB-domain-containing protein; K11375 elongator complex protein 4 (A)	[BK]	--	PAXNEB protein	Elongator complex protein 4 GN=elp4 OS=Schizosaccharomyces pombe (strain 972 / ATCC 24843) PE=3 SV=1	Uncharacterized protein {ECO:0000313|EMBL:CDO76630.1} OS=Pycnoporus cinnabarinus (Cinnabar-red polypore) PE=4 SV=1	PAXNEB-domain-containing protein [Dichomitus squalens LYAD-421 SS1]
EVM0011005.1	--	--	--	--	Ring finger domain	--	Uncharacterized protein {ECO:0000313|EMBL:EIW51818.1} OS=Trametes versicolor (strain FP-101664) PE=4 SV=1	hypothetical protein DICSQDRAFT_132462 [Dichomitus squalens LYAD-421 SS1]
EVM0001488.1	--	--	[S]	Function unknown	Transport protein Avl9	Late secretory pathway protein AVL9 GN=AVL9 OS=Saccharomyces cerevisiae (strain ATCC 204508 / S288c) PE=1 SV=1	Uncharacterized protein {ECO:0000313|EMBL:CDO69895.1} OS=Pycnoporus cinnabarinus (Cinnabar-red polypore) PE=4 SV=1	hypothetical protein DICSQDRAFT_82734 [Dichomitus squalens LYAD-421 SS1]
EVM0000717.1	--	--	--	--	LIM domain	--	Uncharacterized protein {ECO:0000313|EMBL:CDO72364.1} OS=Pycnoporus cinnabarinus (Cinnabar-red polypore) PE=4 SV=1	hypothetical protein DICSQDRAFT_151054 [Dichomitus squalens LYAD-421 SS1]
EVM0010678.1	--	--	--	--	--	--	Uncharacterized protein {ECO:0000313|EMBL:EJF59761.1} OS=Dichomitus squalens (strain LYAD-421) PE=4 SV=1	hypothetical protein DICSQDRAFT_181736 [Dichomitus squalens LYAD-421 SS1]
EVM0003891.1	--	--	--	--	--	--	Uncharacterized protein {ECO:0000313|EMBL:CDO74426.1} OS=Pycnoporus cinnabarinus (Cinnabar-red polypore) PE=4 SV=1	hypothetical protein BN946_scf184764.g2 [Trametes cinnabarina]
EVM0009475.2	--	K02884|1.77895e-99|dsq:DICSQDRAFT_103317|hypothetical protein; K02884 large subunit ribosomal protein L19 (A)	[J]	Translation, ribosomal structure and biogenesis	Ribosomal protein L19	54S ribosomal protein subunit img1, mitochondrial GN=img1 OS=Schizosaccharomyces pombe (strain 972 / ATCC 24843) PE=3 SV=1	Uncharacterized protein {ECO:0000313|EMBL:EPT02868.1} OS=Fomitopsis pinicola (strain FP-58527) PE=4 SV=1	hypothetical protein DICSQDRAFT_103317 [Dichomitus squalens LYAD-421 SS1]
EVM0004393.2	Cellular Component: integral component of membrane (GO:0016021); Biological Process: transmembrane transport (GO:0055085);	--	[G]	Carbohydrate transport and metabolism	Major Facilitator Superfamily	Uncharacterized transporter C1002.16c GN=SPAC1002.16c OS=Schizosaccharomyces pombe (strain 972 / ATCC 24843) PE=3 SV=1	Uncharacterized protein {ECO:0000313|EMBL:CDO73597.1} OS=Pycnoporus cinnabarinus (Cinnabar-red polypore) PE=4 SV=1	MFS general substrate transporter [Dichomitus squalens LYAD-421 SS1]
EVM0010129.1	Molecular Function: oxidoreductase activity, acting on CH-OH group of donors (GO:0016614); Biological Process: single-organism metabolic process (GO:0044710);	--	[R]	General function prediction only	GMC oxidoreductase	Pyranose dehydrogenase 3 {ECO:0000303|PubMed:18097667} (Precursor) OS=Leucoagaricus meleagris (Western flat-topped agaric) PE=2 SV=1	Alcohol oxidase {ECO:0000313|EMBL:EJF56945.1} OS=Dichomitus squalens (strain LYAD-421) PE=3 SV=1	alcohol oxidase [Dichomitus squalens LYAD-421 SS1]
EVM0013051.1	--	--	[R]	General function prediction only	Major Facilitator Superfamily	--	MFS general substrate transporter {ECO:0000313|EMBL:EJF59261.1} OS=Dichomitus squalens (strain LYAD-421) PE=4 SV=1	MFS general substrate transporter [Dichomitus squalens LYAD-421 SS1]
EVM0011449.1	Molecular Function: nucleotide binding (GO:0000166);	K06883|0|dsq:DICSQDRAFT_160765|hypothetical protein; K06883 (A)	[K]	Transcription	Conserved hypothetical ATP binding protein	GPN-loop GTPase 3 {ECO:0000250|UniProtKB:Q06543} GN=CNB04680 OS=Cryptococcus neoformans var. neoformans serotype D (strain JEC21 / PE=3 SV=1	Uncharacterized protein {ECO:0000313|EMBL:EKM59655.1} OS=Phanerochaete carnosa (strain HHB-10118-sp) PE=4 SV=1	hypothetical protein DICSQDRAFT_160765 [Dichomitus squalens LYAD-421 SS1]
EVM0009956.1	Cellular Component: membrane (GO:0016020); Biological Process: metal ion transport (GO:0030001); Molecular Function: metal ion transmembrane transporter activity (GO:0046873); Biological Process: transmembrane transport (GO:0055085);	K14709|0|dsq:DICSQDRAFT_65286|ZIP-like iron-zinc transporter; K14709 solute carrier family 39 (zinc transporter), member 1/2/3 (A)	[P]	Inorganic ion transport and metabolism	ZIP Zinc transporter	Zinc-regulated transporter 1 GN=ZRT1 OS=Saccharomyces cerevisiae (strain ATCC 204508 / S288c) PE=1 SV=1	ZIP-like iron-zinc transporter {ECO:0000313|EMBL:EJF59373.1} OS=Dichomitus squalens (strain LYAD-421) PE=4 SV=1	ZIP-like iron-zinc transporter [Dichomitus squalens LYAD-421 SS1]
EVM0002205.1	--	--	--	--	--	--	Uncharacterized protein {ECO:0000313|EMBL:CDO77956.1} OS=Pycnoporus cinnabarinus (Cinnabar-red polypore) PE=4 SV=1	hypothetical protein DICSQDRAFT_179128 [Dichomitus squalens LYAD-421 SS1]
EVM0007978.1	--	--	[R]	General function prediction only	Putative serine esterase (DUF676)	Putative lipase YOR059C GN=YOR059C OS=Saccharomyces cerevisiae (strain ATCC 204508 / S288c) PE=1 SV=1	Uncharacterized protein {ECO:0000313|EMBL:EMD39209.1} OS=Ceriporiopsis subvermispora (strain B) PE=4 SV=1	hypothetical protein DICSQDRAFT_153185 [Dichomitus squalens LYAD-421 SS1]
EVM0002306.3	--	--	[Q]	Secondary metabolites biosynthesis, transport and catabolism	short chain dehydrogenase	Uncharacterized oxidoreductase C736.13 GN=SPCC736.13 OS=Schizosaccharomyces pombe (strain 972 / ATCC 24843) PE=3 SV=1	Uncharacterized protein {ECO:0000313|EMBL:CDO73677.1} OS=Pycnoporus cinnabarinus (Cinnabar-red polypore) PE=4 SV=1	NAD(P)-binding protein [Dichomitus squalens LYAD-421 SS1]
EVM0000045.1	--	K11270|1.30932e-46|dsq:DICSQDRAFT_108000|hypothetical protein; K11270 chromosome transmission fidelity protein 8 (A)	--	--	Ctf8	Chromosome transmission fidelity protein 8 GN=ctf8 OS=Schizosaccharomyces pombe (strain 972 / ATCC 24843) PE=1 SV=1	Uncharacterized protein {ECO:0000313|EMBL:EJF59996.1} OS=Dichomitus squalens (strain LYAD-421) PE=4 SV=1	hypothetical protein TRAVEDRAFT_118314 [Trametes versicolor FP-101664 SS1]
EVM0012868.1	--	--	--	--	--	--	Uncharacterized protein {ECO:0000313|EMBL:EJF58706.1} OS=Dichomitus squalens (strain LYAD-421) PE=4 SV=1	hypothetical protein TRAVEDRAFT_127290 [Trametes versicolor FP-101664 SS1]
EVM0012304.1	--	--	--	--	RhoGEF domain	--	Uncharacterized protein {ECO:0000313|EMBL:EJF62299.1} OS=Dichomitus squalens (strain LYAD-421) PE=4 SV=1	hypothetical protein DICSQDRAFT_180170 [Dichomitus squalens LYAD-421 SS1]
EVM0012902.1	--	K14554|7.45167e-41|ppl:POSPLDRAFT_106769|hypothetical protein; K14554 U3 small nucleolar RNA-associated protein 21 (A)	--	--	F-box-like	--	Uncharacterized protein {ECO:0000313|EMBL:CDO73538.1} OS=Pycnoporus cinnabarinus (Cinnabar-red polypore) PE=4 SV=1	hypothetical protein TRAVEDRAFT_57489 [Trametes versicolor FP-101664 SS1]
EVM0003841.1	--	--	--	--	--	--	Uncharacterized protein {ECO:0000313|EMBL:EPQ57296.1} OS=Gloeophyllum trabeum (strain ATCC 11539 / FP-39264 / Madison 617) PE=4 SV=1	hypothetical protein DICSQDRAFT_152589 [Dichomitus squalens LYAD-421 SS1]
EVM0006177.1	Biological Process: metabolic process (GO:0008152); Molecular Function: hydrolase activity, acting on glycosyl bonds (GO:0016798);	--	[G]	Carbohydrate transport and metabolism	Glycosyl hydrolases family 35	Probable beta-galactosidase C (Precursor) GN=lacC OS=Aspergillus niger (strain CBS 513.88 / FGSC A1513) PE=3 SV=1	Uncharacterized protein {ECO:0000313|EMBL:EJF56355.1} OS=Dichomitus squalens (strain LYAD-421) PE=3 SV=1	hypothetical protein DICSQDRAFT_183873 [Dichomitus squalens LYAD-421 SS1]
EVM0007119.1	--	--	[U]	Intracellular trafficking, secretion, and vesicular transport	ABC transporter	Iron-sulfur clusters transporter ATM1, mitochondrial (Precursor) GN=ATM1 OS=Cryptococcus neoformans var. neoformans serotype D (strain JEC21 / PE=3 SV=1	HlyB/MsbA family ABC transporter {ECO:0000313|EMBL:EJF56134.1} OS=Dichomitus squalens (strain LYAD-421) PE=3 SV=1	HlyB/MsbA family ABC transporter [Dichomitus squalens LYAD-421 SS1]
EVM0000161.1	--	--	[F]	Nucleotide transport and metabolism	Putative methyltransferase	Diaminohydroxyphosphoribosylamino-pyrimidine deaminase OS=Schizosaccharomyces pombe (strain 972 / ATCC 24843) PE=3 SV=1	Uncharacterized protein {ECO:0000313|EMBL:EJF58229.1} OS=Dichomitus squalens (strain LYAD-421) PE=4 SV=1	hypothetical protein DICSQDRAFT_110557 [Dichomitus squalens LYAD-421 SS1]
EVM0002944.1	Molecular Function: hydrolase activity (GO:0016787);	K01230|0|dsq:DICSQDRAFT_110961|glycoside hydrolase family 47 protein; K01230 mannosyl-oligosaccharide alpha-1,2-mannosidase [EC:3.2.1.113] (A)	[G]	Carbohydrate transport and metabolism	Glycosyl hydrolase family 47	Probable mannosyl-oligosaccharide alpha-1,2-mannosidase 1B (Precursor) GN=mns1B OS=Aspergillus terreus (strain NIH 2624 / FGSC A1156) PE=3 SV=1	alpha-1,2-Mannosidase {ECO:0000256|RuleBase:RU361193} OS=Dichomitus squalens (strain LYAD-421) PE=3 SV=1	glycoside hydrolase family 47 protein [Dichomitus squalens LYAD-421 SS1]
EVM0011190.1	--	--	[K]	Transcription	Transcriptional Coactivator p15 (PC4)	RNA polymerase II transcriptional coactivator SUB1 GN=YM9532.04C OS=Saccharomyces cerevisiae (strain ATCC 204508 / S288c) PE=1 SV=1	Uncharacterized protein {ECO:0000313|EMBL:CDO77711.1} OS=Pycnoporus cinnabarinus (Cinnabar-red polypore) PE=4 SV=1	hypothetical protein BN946_scf184969.g62 [Trametes cinnabarina]
EVM0010422.1	--	--	--	--	--	--	Uncharacterized protein {ECO:0000313|EMBL:EJF60060.1} OS=Dichomitus squalens (strain LYAD-421) PE=4 SV=1	hypothetical protein DICSQDRAFT_127968 [Dichomitus squalens LYAD-421 SS1]
EVM0003119.1	--	K17906|0|dsq:DICSQDRAFT_143230|hypothetical protein; K17906 autophagy-related protein 2 (A)	[U]	Intracellular trafficking, secretion, and vesicular transport	ATG C terminal domain	Autophagy-related protein 2 GN=ATG2 OS=Cryptococcus neoformans var. neoformans serotype D (strain JEC21 / PE=3 SV=1	Uncharacterized protein {ECO:0000313|EMBL:CDO68278.1} OS=Pycnoporus cinnabarinus (Cinnabar-red polypore) PE=4 SV=1	hypothetical protein DICSQDRAFT_143230 [Dichomitus squalens LYAD-421 SS1]
EVM0000735.1	--	--	--	--	--	--	Uncharacterized protein {ECO:0000313|EMBL:CDO68868.1} OS=Pycnoporus cinnabarinus (Cinnabar-red polypore) PE=4 SV=1	hypothetical protein BN946_scf185000.g11 [Trametes cinnabarina]
EVM0004617.1	Molecular Function: nucleotide binding (GO:0000166); Cellular Component: membrane (GO:0016020); Molecular Function: hydrolase activity (GO:0016787); Molecular Function: ion binding (GO:0043167);	K01539|0|dsq:DICSQDRAFT_47382|sodium-potassium ATPase; K01539 sodium/potassium-transporting ATPase subunit alpha [EC:3.6.3.9] (A)	[P]	Inorganic ion transport and metabolism	E1-E2 ATPase	Calcium-transporting ATPase 1 GN=PMR1 OS=Yarrowia lipolytica (strain CLIB 122 / E 150) PE=3 SV=1	Sodium-potassium ATPase {ECO:0000313|EMBL:EJF58252.1} OS=Dichomitus squalens (strain LYAD-421) PE=3 SV=1	sodium-potassium ATPase [Dichomitus squalens LYAD-421 SS1]
EVM0010888.1	--	--	[S]	Function unknown	C3HC zinc finger-like	mRNA export factor rsm1 GN=rsm1 OS=Schizosaccharomyces pombe (strain 972 / ATCC 24843) PE=4 SV=1	Uncharacterized protein {ECO:0000313|EMBL:CDO74994.1} OS=Pycnoporus cinnabarinus (Cinnabar-red polypore) PE=4 SV=1	zf-C3HC-domain-containing protein [Dichomitus squalens LYAD-421 SS1]
EVM0006145.1	Molecular Function: nucleotide binding (GO:0000166); Molecular Function: DNA binding (GO:0003677); Molecular Function: DNA-directed DNA polymerase activity (GO:0003887); Biological Process: DNA replication (GO:0006260);	K02327|0|dsq:DICSQDRAFT_81194|hypothetical protein; K02327 DNA polymerase delta subunit 1 [EC:2.7.7.7] (A)	[L]	Replication, recombination and repair	DNA polymerase family B	DNA polymerase delta catalytic subunit GN=pol3 OS=Schizosaccharomyces pombe (strain 972 / ATCC 24843) PE=1 SV=2	DNA polymerase {ECO:0000256|RuleBase:RU000442} OS=Pycnoporus cinnabarinus (Cinnabar-red polypore) PE=3 SV=1	hypothetical protein DICSQDRAFT_81194 [Dichomitus squalens LYAD-421 SS1]
EVM0001864.1	Molecular Function: isocitrate lyase activity (GO:0004451); Biological Process: carboxylic acid metabolic process (GO:0019752);	K01637|0|dsq:DICSQDRAFT_112226|isocitrate lyase; K01637 isocitrate lyase [EC:4.1.3.1] (A)	[C]	Energy production and conversion	Isocitrate lyase family	Isocitrate lyase GN=ACU-7 OS=Coprinopsis cinerea (strain Okayama-7 / 130 / ATCC MYA-4618 / FGSC PE=3 SV=1	Isocitrate lyase {ECO:0000256|PIRNR:PIRNR001362} OS=Pycnoporus cinnabarinus (Cinnabar-red polypore) PE=3 SV=1	hypothetical protein BN946_scf184801.g51 [Trametes cinnabarina]
EVM0001487.1	--	--	--	--	Domain of unknown function (DUF3415)	Versatile peroxidase VPL2 (Precursor) GN=vpl2 OS=Pleurotus eryngii (Boletus of the steppes) PE=1 SV=1	Manganese peroxidase isozyme {ECO:0000313|EMBL:EJF56126.1} OS=Dichomitus squalens (strain LYAD-421) PE=3 SV=1	manganese peroxidase isozyme precursor [Dichomitus squalens LYAD-421 SS1]
EVM0011339.1	Biological Process: metabolic process (GO:0008152); Molecular Function: transferase activity, transferring acyl groups other than amino-acyl groups (GO:0016747);	K08764|0|dsq:DICSQDRAFT_182527|thiolase-like protein; K08764 sterol carrier protein 2 [EC:2.3.1.176] (A)	[I]	Lipid transport and metabolism	Thiolase, C-terminal domain	--	Thiolase-like protein {ECO:0000313|EMBL:EJF58428.1} OS=Dichomitus squalens (strain LYAD-421) PE=3 SV=1	thiolase-like protein [Dichomitus squalens LYAD-421 SS1]
EVM0005101.1	--	K00480|3.1789e-175|dsq:DICSQDRAFT_180399|FAD/NAD(P)-binding domain-containing protein; K00480 salicylate hydroxylase [EC:1.14.13.1] (A)	[CR]	--	FAD binding domain	Kynurenine 3-monooxygenase {ECO:0000255|HAMAP-Rule:MF_03018} OS=Ustilago maydis (strain 521 / FGSC 9021) PE=3 SV=2	FAD/NAD(P)-binding domain-containing protein {ECO:0000313|EMBL:EJF62079.1} OS=Dichomitus squalens (strain LYAD-421) PE=4 SV=1	FAD/NAD(P)-binding domain-containing protein [Dichomitus squalens LYAD-421 SS1]
EVM0012481.1	--	--	--	--	--	--	Uncharacterized protein {ECO:0000313|EMBL:EJF60059.1} OS=Dichomitus squalens (strain LYAD-421) PE=4 SV=1	hypothetical protein DICSQDRAFT_171544 [Dichomitus squalens LYAD-421 SS1]
EVM0005224.2	--	--	--	--	--	--	Uncharacterized protein {ECO:0000313|EMBL:EJF56603.1} OS=Dichomitus squalens (strain LYAD-421) PE=4 SV=1	hypothetical protein DICSQDRAFT_183737 [Dichomitus squalens LYAD-421 SS1]
EVM0005094.1	--	--	--	--	--	--	Uncharacterized protein {ECO:0000313|EMBL:EJF61438.1} OS=Dichomitus squalens (strain LYAD-421) PE=4 SV=1	hypothetical protein TRAVEDRAFT_117289 [Trametes versicolor FP-101664 SS1]
EVM0006431.3	--	--	[G]	Carbohydrate transport and metabolism	Major Facilitator Superfamily	Uncharacterized transporter C11D3.18C GN=SPAC11D3.18c OS=Schizosaccharomyces pombe (strain 972 / ATCC 24843) PE=3 SV=1	Uncharacterized protein {ECO:0000313|EMBL:CDO69415.1} OS=Pycnoporus cinnabarinus (Cinnabar-red polypore) PE=4 SV=1	hypothetical protein BN946_scf184791.g10 [Trametes cinnabarina]
EVM0008735.1	--	--	--	--	--	--	Uncharacterized protein {ECO:0000313|EMBL:CDO75680.1} OS=Pycnoporus cinnabarinus (Cinnabar-red polypore) PE=4 SV=1	hypothetical protein DICSQDRAFT_166310 [Dichomitus squalens LYAD-421 SS1]
EVM0003794.1	--	--	--	--	--	--	Uncharacterized protein {ECO:0000313|EMBL:EJF59406.1} OS=Dichomitus squalens (strain LYAD-421) PE=4 SV=1	hypothetical protein DICSQDRAFT_123728 [Dichomitus squalens LYAD-421 SS1]
EVM0011409.2	--	K18327|1.00349e-125|dsq:DICSQDRAFT_46863|hypothetical protein; K18327 RNA exonuclease 4 [EC:3.1.-.-] (A)	[L]	Replication, recombination and repair	Exonuclease	RNA exonuclease 4 GN=REX4 OS=Cryptococcus neoformans var. neoformans serotype D (strain JEC21 / PE=3 SV=1	Uncharacterized protein {ECO:0000313|EMBL:EMD41973.1} OS=Ceriporiopsis subvermispora (strain B) PE=4 SV=1	hypothetical protein DICSQDRAFT_46863 [Dichomitus squalens LYAD-421 SS1]
EVM0013096.1	--	--	--	--	--	--	Uncharacterized protein {ECO:0000313|EMBL:EJF57268.1} OS=Dichomitus squalens (strain LYAD-421) PE=4 SV=1	hypothetical protein DICSQDRAFT_69817 [Dichomitus squalens LYAD-421 SS1]
EVM0003999.1	--	K17408|0|dsq:DICSQDRAFT_53564|hypothetical protein; K17408 small subunit ribosomal protein S29 (A)	[J]	Translation, ribosomal structure and biogenesis	Mitochondrial ribosomal death-associated protein 3	37S ribosomal protein S23, mitochondrial (Precursor) GN=RSM23 OS=Saccharomyces cerevisiae (strain ATCC 204508 / S288c) PE=1 SV=3	Uncharacterized protein {ECO:0000313|EMBL:CDO72071.1} OS=Pycnoporus cinnabarinus (Cinnabar-red polypore) PE=4 SV=1	hypothetical protein DICSQDRAFT_53564 [Dichomitus squalens LYAD-421 SS1]
EVM0002076.1	--	--	--	--	--	--	Uncharacterized protein {ECO:0000313|EMBL:EJF60372.1} (Fragment) OS=Dichomitus squalens (strain LYAD-421) PE=4 SV=1	hypothetical protein DICSQDRAFT_62834, partial [Dichomitus squalens LYAD-421 SS1]
EVM0001351.1	Molecular Function: metal ion binding (GO:0046872);	--	[R]	General function prediction only	PHD-zinc-finger like domain	NuA3 HAT complex component NTO1 GN=NTO1 OS=Saccharomyces cerevisiae (strain ATCC 204508 / S288c) PE=1 SV=1	Uncharacterized protein {ECO:0000313|EMBL:EJF58070.1} OS=Dichomitus squalens (strain LYAD-421) PE=4 SV=1	hypothetical protein DICSQDRAFT_182787 [Dichomitus squalens LYAD-421 SS1]
EVM0005552.4	--	--	--	--	--	--	Uncharacterized protein {ECO:0000313|EMBL:CCL98358.1} OS=Fibroporia radiculosa (strain TFFH 294) PE=4 SV=1	predicted protein [Fibroporia radiculosa]
EVM0004607.1	Biological Process: mRNA splicing, via spliceosome (GO:0000398); Cellular Component: spliceosomal complex (GO:0005681);	K11097|4.38246e-53|dsq:DICSQDRAFT_156754|Sm-like ribonucleo protein; K11097 small nuclear ribonucleoprotein E (A)	[A]	RNA processing and modification	LSM domain	Small nuclear ribonucleoprotein E {ECO:0000250|UniProtKB:Q12330} OS=Schizosaccharomyces pombe (strain 972 / ATCC 24843) PE=1 SV=1	Uncharacterized protein {ECO:0000313|EMBL:CDO72725.1} OS=Pycnoporus cinnabarinus (Cinnabar-red polypore) PE=4 SV=1	hypothetical protein BN946_scf184990.g8 [Trametes cinnabarina]
EVM0007303.1	Molecular Function: catalytic activity (GO:0003824);	--	[CR]	--	NADH:flavin oxidoreductase / NADH oxidase family	Probable inactive dehydrogenase EasA GN=easA OS=Claviceps purpurea (Ergot fungus) PE=3 SV=2	Uncharacterized protein {ECO:0000313|EMBL:CDO72487.1} OS=Pycnoporus cinnabarinus (Cinnabar-red polypore) PE=4 SV=1	NADH:flavin oxidoreductase/NADH oxidase [Dichomitus squalens LYAD-421 SS1]
EVM0003692.1	--	--	--	--	Centromere protein Scm3	--	Uncharacterized protein {ECO:0000313|EMBL:KDQ62415.1} OS=Jaapia argillacea MUCL 33604 PE=4 SV=1	hypothetical protein TRAVEDRAFT_71528, partial [Trametes versicolor FP-101664 SS1]
EVM0012002.1	--	K01537|1.71324e-41|dsq:DICSQDRAFT_52747|calcium-translocating P-type ATPase; K01537 Ca2+-transporting ATPase [EC:3.6.3.8] (A)	--	--	Putative hydrolase of sodium-potassium ATPase alpha subunit	--	Calcium-transporting ATPase {ECO:0000256|RuleBase:RU361146} OS=Pycnoporus cinnabarinus (Cinnabar-red polypore) PE=3 SV=1	calcium-translocating P-type ATPase [Dichomitus squalens LYAD-421 SS1]
EVM0000293.1	--	K18624|0|dsq:DICSQDRAFT_140404|hypothetical protein; K18624 macrophage erythroblast attacher (A)	[S]	Function unknown	CTLH/CRA C-terminal to LisH motif domain	Protein fyv10 GN=fyv10 OS=Aspergillus clavatus (strain ATCC 1007 / CBS 513.65 / DSM 816 / NCTC PE=3 SV=1	Uncharacterized protein {ECO:0000313|EMBL:EJF57375.1} OS=Dichomitus squalens (strain LYAD-421) PE=4 SV=1	hypothetical protein DICSQDRAFT_140404 [Dichomitus squalens LYAD-421 SS1]
EVM0006359.1	--	--	--	--	Heterokaryon incompatibility protein (HET)	Vegetative incompatibility protein HET-E-1 GN=HET-E1 OS=Podospora anserina (Pleurage anserina) PE=3 SV=1	HET-domain-containing protein {ECO:0000313|EMBL:EJF56991.1} (Fragment) OS=Dichomitus squalens (strain LYAD-421) PE=4 SV=1	HET-domain-containing protein, partial [Trametes versicolor FP-101664 SS1]
[truncated: 11,627 more rows]

## Sheet: GO.anno.stat
#GO_Function	Unigene_number	Unigene_ID
Biological Process	2781
Biological Process: 'de novo' AMP biosynthetic process (GO:0044208);	1	EVM0003184.1
[truncated: 1,361 more rows]

## Sheet: Kegg.pathway
#pathway	pathway_id	Gene_number	Gene_id	KOs
[truncated: 109 more rows]

## Sheet: Kegg.ko
#Gene_id	KO|e_value|Database_Genes|Anno
[truncated: 3,401 more rows]

[truncated: 6 more sheets: Swiss-Prot.anno.list, TrEMBL.anno.list, Pfam.anno.list, CAZymes.anno.list, Transport protein.anno.list, PHI.anno.list]
